# Supplementary material for: TBAB-catalyzed cascade reactions: facile synthesis of 1-trifluoromethyl-3-alkylidene-1,3-dihydrofuro[3,4-b]quinolines via 5-exo-dig cyclization of o-arylalkynylquinoline aldehydes
Source: Royal Society of Chemistry journal article supplement (doi:10.1039/c7qo00273d), 2017-01-01

## Supporting Information

### **TBAB-Catalyzed Cascade Reactions: Facile Synthesis of 1-Trifluoromethyl-3-alkylidene-1,3-dihydro-furo[3,4-*b*]quinolines *via* 5-*exo*-dig Cyclization of *o*-Arylalkynylquinoline Aldehydes**

Kalpana Mishra, Jay bahadur Singh, Tanu Gupta and Radhey M. Singh\*

\*Department of Chemistry, Center of Advanced study, Institute of Science, Banaras Hindu University, Varanasi, 221005, India. Email: rmohan@bhu.ac.in

| <b>Contents</b>                                                                                                                      | <b>Page no</b> |
|--------------------------------------------------------------------------------------------------------------------------------------|----------------|
| General introduction                                                                                                                 | 2              |
| Experimental procedure for synthesis of starting materials <b>4</b> and their corresponding data                                     | 2-4            |
| Representative procedure for the synthesis of 1,3-dihydrofuroquinolines <b>5</b> and their corresponding data                        | 5-10           |
| X-ray crystallography Data of <b>5i</b>                                                                                              | 10-13          |
| References                                                                                                                           | 13             |
| <sup>1</sup> H NMR (500 MHz), <sup>13</sup> C NMR (125 MHz) and <sup>19</sup> F NMR (500 MHz) spectra of starting materials <b>4</b> | 14-39          |
| <sup>1</sup> H NMR (500 MHz), <sup>13</sup> C NMR (125 MHz) and <sup>19</sup> F NMR (500 MHz) spectra of cyclized product <b>5</b>   | 40-111         |

## General introduction

$^1\text{H}$  NMR,  $^{19}\text{F}$  NMR and  $^{13}\text{C}$  NMR spectra were recorded at ambient temperature using JEOL at 500 MHz and 125 MHz spectrometer respectively. The data are reported as follows: chemical shift in ppm from internal tetramethylsilane (TMS) on the  $\delta$  scale, multiplicity (s = singlet, d = doublet, t = triplet, q = quartet, m = multiplet), coupling constants (Hz) and integration. Melting points were measured using Buchi melting-point apparatus in an open capillary tube. IR spectra were recorded on VARIAN 3300 FTIR spectrophotometers in  $\text{cm}^{-1}$  units. High resolution mass spectra (HRMS) were obtained on TOF/6500 SRIES QTOF B.05.00 (B5042.0).  $\text{TMSCF}_3$ , and TBAB are commercially available. Solvents were purified according to standard procedures. The developed chromatogram was analyzed by UV light. Column chromatography was performed using flash silica gel.

## General procedure for synthesis of starting materials 4:

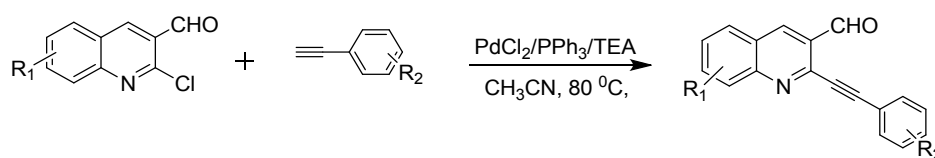

Solution of 2-chloroquinoline-3-carbaldehyde (0.25 mmol), phenyl acetylene (0.26 mmol),  $\text{PdCl}_2$  (4 mol %),  $\text{PPh}_3$  (8 mol %),  $\text{CH}_3\text{CN}$  (4 mL) and TEA (0.5 mmol) was stirred under  $\text{N}_2$  at  $80^\circ\text{C}$  for 1.5–6 h (as monitored by TLC). The reaction mixture was concentrated in vacuo and residue obtained was purified by column chromatography hexane: ethyl acetate to afford 4 (a–z). Data of compounds 4a<sup>1a</sup>, 4k-p<sup>1a</sup>, 4x<sup>1a</sup>, 4e-f,<sup>1b</sup> 4h<sup>1b</sup>, 4v<sup>1b</sup>, 4z<sup>1b</sup>, 4u<sup>1c</sup> and 4y<sup>1d</sup> is reported in the literature.

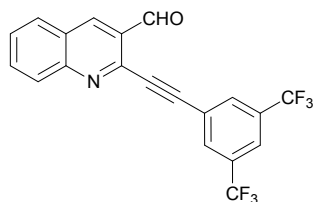

### 2-((3,5-bis(trifluoromethyl)phenyl)ethynyl)quinoline-3-carbaldehyde (4b):

2-chloroquinoline-3-carbaldehyde (0.09 g, 0.50 mmol), 1-ethynyl-3,5-bis(trifluoromethyl)benzene (0.52 mmol), TEA (1.0 mmol), Reaction time: 2 h, yield: 0.17 g, 88%, yellow solid, mp:  $155^\circ\text{C}$ , IR (KBr):  $\nu$  2230, 1697  $\text{cm}^{-1}$ ,  $^1\text{H}$  NMR (500 MHz,  $\text{CDCl}_3$ ):  $\delta$  10.74 (s, 1H), 8.79 (s, 1H), 8.20 (d,  $J = 8.5$  Hz, 1H), 8.15 (s, 2H), 8.01 (d,  $J = 7.0$  Hz, 1H), 7.93 (s, 2H), 7.70 (t,  $J = 7.5$  Hz, 1H),  $^{13}\text{C}$  NMR (125 MHz,  $\text{CDCl}_3$ ):  $\delta$  189.90, 150.18, 142.33, 138.11, 133.47, 132.83,

132.27 (q,  $J = 34.00$  Hz), 129.73, 129.56, 129.03, 128.94, 126.79, 123.91, 123.18, 121.75, 91.04, 88.50,  $^{19}\text{F}$  NMR (500 MHz,  $\text{CDCl}_3$ ):  $\delta$  -63.02, HRMS (ESI) exact mass calcd. for  $\text{C}_{20}\text{H}_9\text{F}_6\text{NOH}$ : 394.0667 (M+H)<sup>+</sup>, found: 394.0683 (M+H)<sup>+</sup>.

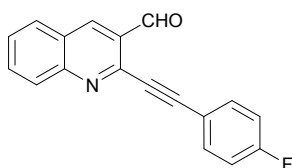

### 2-((4-fluorophenyl)ethynyl)quinoline-3-carbaldehyde (4c):

2-chloroquinoline-3-carbaldehyde (0.09 g, 0.50 mmol), 1-ethynyl-4-fluorobenzene (0.52 mmol), TEA (1.0 mmol), Reaction time: 2 h, yield: 0.12 g, 87%, yellow solid, mp:  $160^\circ\text{C}$ , IR (KBr):  $\nu$  2207, 1693  $\text{cm}^{-1}$ ,  $^1\text{H}$  NMR (500 MHz,  $\text{CDCl}_3$ ):  $\delta$  10.77 (s, 1H), 8.75 (s, 1H), 8.17 (d,  $J = 8.5$  Hz, 1H), 7.97 (d,  $J = 8.5$  Hz, 1H), 7.88 (t,  $J = 8.0$  Hz, 1H), 7.70 (t,  $J = 8.0$  Hz, 2H), 7.65 (t,  $J = 7.0$  Hz, 1H), 7.12 (t,  $J = 8.5$  Hz, 2H),  $^{13}\text{C}$  NMR (125

MHz,  $\text{CDCl}_3$ ):  $\delta$  190.72, 161.80 (d,  $J = 250.62$  Hz), 150.23, 143.75, 137.44, 134.50 (d,  $J = 8.75$  Hz), 133.21, 129.75, 129.39, 128.88, 128.40, 126.52, 117.56 (d,  $J = 13.5$  Hz), 116.16 (d,  $J = 21.87$  Hz), 94.45, 85.47,  $^{19}\text{F}$  NMR (500 MHz,  $\text{CDCl}_3$ ):  $\delta$  -107.79, HRMS (ESI) exact mass calcd. for  $\text{C}_{18}\text{H}_{10}\text{FNOH}$ : 276.0825 (M+H)<sup>+</sup>, found: 276.0819 (M+H)<sup>+</sup>.

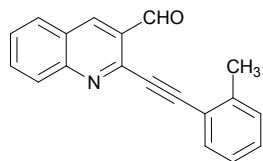

**2-(o-tolylethynyl)quinoline-3-carbaldehyde (4d):** 2-chloroquinoline-3-carbaldehyde (0.09 g, 0.50 mmol), 1-ethynyl-2-methylbenzene (0.52 mmol), TEA (1.0 mmol), Reaction time: 3 h, yield: 0.12 g, 88 %, yellow solid, mp: 146 °C, IR (KBr):  $\nu$  2200, 1691  $\text{cm}^{-1}$ ,  $^1\text{H}$  NMR (500 MHz,  $\text{CDCl}_3$ ):  $\delta$  10.76 (s, 1H), 8.68 (s, 1H), 8.10 (d,  $J$  = 8.5 Hz, 1H), 7.90 (d,  $J$  = 7.5 Hz, 1H), 7.80 (t,  $J$  = 8.5 Hz, 1H), 7.66 (d,  $J$  = 7.5 Hz, 1H), 7.56 (t,  $J$  = 8.0 Hz, 1H), 7.28-7.15 (m, 3H), 2.54 (s, 3H),  $^{13}\text{C}$  NMR (125 MHz,  $\text{CDCl}_3$ ):  $\delta$  190.94, 150.35, 144.18, 141.17, 137.20, 133.09, 133.01, 129.92, 129.84, 129.73, 129.43, 128.92, 128.26, 126.48, 125.92, 121.32, 94.62, 89.39, 21.16, HRMS (ESI) exact mass calcd. for  $\text{C}_{19}\text{H}_{13}\text{NOH}$ : 272.1075 (M+H)<sup>+</sup>, found 272.1086 (M+H)<sup>+</sup>.

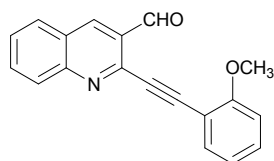

**2-(2-methoxyphenyl)ethynylquinoline-3-carbaldehyde (4g):** 2-chloroquinoline-3-carbaldehyde (0.09 g, 0.50 mmol), 1-ethynyl-2-methoxybenzene (0.52 mmol), TEA (1.0 mmol), Reaction time: 2 h, yield: 0.12 g, 85 %, yellow solid, mp: 158 °C, IR (KBr):  $\nu$  2206, 1689  $\text{cm}^{-1}$ ,  $^1\text{H}$  NMR (500 MHz,  $\text{CDCl}_3$ ):  $\delta$  10.93 (s, 1H), 8.73 (s, 1H), 8.16 (d,  $J$  = 8.5 Hz, 1H), 7.94 (d,  $J$  = 7.5 Hz, 1H), 7.85 (t,  $J$  = 7.0 Hz, 1H), 7.65 (d,  $J$  = 7.5 Hz, 1H), 7.61 (d,  $J$  = 7.0 Hz, 1H), 7.40 (t,  $J$  = 7.5 Hz, 1H), 7.00-6.94 (m, 2H), 3.96 (s, 3H),  $^{13}\text{C}$  NMR (125 MHz,  $\text{CDCl}_3$ ):  $\delta$  192.12, 161.20, 150.19, 144.51, 136.61, 133.88, 132.88, 131.48, 129.71, 129.33, 129.01, 128.03, 126.40, 120.65, 110.67, 110.64, 92.80, 89.86, 55.88, HRMS (ESI) exact mass calcd. for  $\text{C}_{19}\text{H}_{13}\text{NO}_2\text{H}$ : 288.1025 (M+H)<sup>+</sup>, found 288.1048 (M+H)<sup>+</sup>.

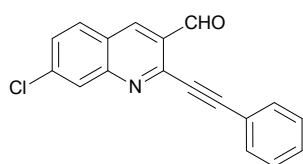

**7-chloro-2-(phenylethynyl)quinoline-3-carbaldehyde (4i):** 2,7-dichloroquinoline-3-carbaldehyde (0.11 g, 0.50 mmol), ethynylbenzene (0.52 mmol), TEA (1.0 mmol), Reaction time: 3 h, yield: 0.13 g, 86 %, white solid, mp: 150 °C, IR (KBr):  $\nu$  2210, 1698  $\text{cm}^{-1}$ ,  $^1\text{H}$  NMR (500 MHz,  $\text{CDCl}_3$ ):  $\delta$  10.78 (s, 1H), 8.72 (s, 1H), 8.16 (s, 1H), 7.90 (d,  $J$  = 8.5 Hz, 1H), 7.70 (d,  $J$  = 6.0 Hz, 2H), 7.59-7.57 (m, 1H), 7.46-7.41 (m, 3H),  $^{13}\text{C}$  NMR (125 MHz,  $\text{CDCl}_3$ ):  $\delta$  190.48, 150.47, 145.038, 139.461, 136.961, 134.56, 132.45, 130.82, 130.15, 129.44, 128.73, 128.39, 124.87, 121.18, 96.44, 85.34, HRMS (ESI) exact mass calcd. for  $\text{C}_{18}\text{H}_{10}\text{ClNOH}$ : 292.0529 (M+H)<sup>+</sup>, found 292.0538 (M+H)<sup>+</sup>.

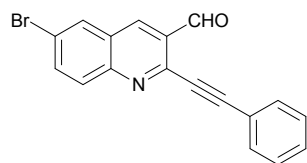

**6-bromo-2-(phenylethynyl)quinoline-3-carbaldehyde (4j):** 6-bromo-2-(phenylethynyl)quinoline-3-carbaldehyde (0.14 g, 0.50 mmol), ethynylbenzene (0.52 mmol), TEA (1.0 mmol), Reaction time 2 h, yield: 0.14 g, 84%, yellow solid, mp: 160 °C, IR (KBr):  $\nu$  2211, 1693  $\text{cm}^{-1}$ ,  $^1\text{H}$  NMR (500 MHz,  $\text{CDCl}_3$ ):  $\delta$  10.80 (s, 1H), 8.69 (s, 1H), 8.13 (d,  $J$  = 9.0 Hz, 1H), 7.94 (d,  $J$  = 9.0 Hz, 1H), 7.70 (d,  $J$  = 7.5 Hz, 1H), 7.60-7.58 (m, 1H), 7.46-7.38 (m, 4H),  $^{13}\text{C}$  NMR (125 MHz,  $\text{CDCl}_3$ ):  $\delta$  190.84, 150.24, 143.96, 137.22, 133.10, 132.38, 129.93, 129.72, 129.39, 128.91, 128.66, 128.29, 126.50, 121.42, 95.60, 85.61, HRMS (ESI) exact mass calcd. for  $\text{C}_{18}\text{H}_{10}\text{BrNOH}$ : 336.0024 (M+H)<sup>+</sup>, found 336.0033 (M+H)<sup>+</sup>.

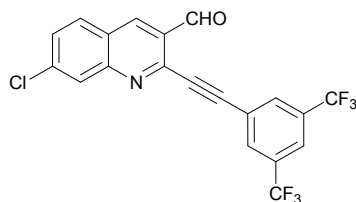

**2-((3,5-bis(trifluoromethyl)phenyl)ethynyl)-7-chloroquinoline-3-carbaldehyde (4q):** 2,7-dichloroquinoline-3-carbaldehyde (0.11 g, 0.50 mmol), 1-ethynyl-3,5-bis(trifluoromethyl)benzene (0.52 mmol), TEA (1.0 mmol), Reaction time: 2 h, yield: 0.19 g, 89%, yellow solid, mp: 170°C, IR (KBr):  $\nu$  2230, 1697  $\text{cm}^{-1}$ ,  $^1\text{H}$  NMR (500 MHz,  $\text{CDCl}_3$ ):  $\delta$  10.72 (s, 1H), 8.76 (s, 1H), 8.19 (s, 1H), 8.15 (s, 2H), 7.95 (d,  $J$  = 8.5 Hz, 2H), 7.65-7.63 (m, 1H),  $^{13}\text{C}$  NMR (125 MHz,  $\text{CDCl}_3$ ):  $\delta$  189.51, 150.39, 148.43, 139.87, 137.79, 132.33 (q,  $J$  = 32.87 Hz), 130.80, 130.08, 129.08, 128.55, 125.15, 123.90, 123.68, 123.38, 121.72, 91.75, 88.12,  $^{19}\text{F}$  NMR (500 MHz,  $\text{CDCl}_3$ ):  $\delta$  -63.03, HRMS (ESI) exact mass calcd. for

$C_{20}H_8ClF_6NOH$ : 428.0277 (M+H)<sup>+</sup>, found 428.0260 (M+H)<sup>+</sup>.

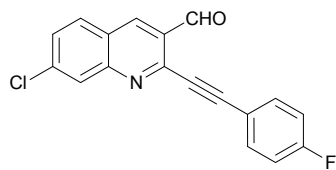

**7-chloro-2-((4-fluorophenyl)ethynyl)quinoline-3-carbaldehyde (4r):** 2,7-dichloroquinoline-3-carbaldehyde (0.11 g 0.50 mmol), 1-ethynyl-4-fluorobenzene (0.52 mmol), TEA (1.0 mmol), Reaction time: 2 h, Yield: 0.13 g, 87 %, brown solid, mp: 178 °C, IR (KBr):  $\nu$  2230, 1697  $cm^{-1}$ ,  $^1H$  NMR (500 MHz,  $CDCl_3$ ):  $\delta$  10.75 (s, 1H), 8.72 (s, 1H), 8.16 (s, 1H), 7.92 (d,  $J$  = 9.0 Hz, 1H), 7.70 (t,  $J$  = 8.5 Hz, 1H), 7.60-7.58 (m, 1H), 7.13 (t,  $J$  = 8.5 Hz, 3H),  $^{13}C$  NMR (125 MHz,  $CDCl_3$ ):  $\delta$  190.07, 163.52 (d,  $J$  = 251.12 Hz), 150.49 (d,  $J$  = 39.75 Hz), 144.24, 139.41, 137.01, 134.49 (d,  $J$  = 8.5 Hz), 133.43, 132.66, 130.70, 129.39, 128.25 (d,  $J$  = 7.75 Hz), 128.80 (d,  $J$  = 12.75 Hz), 117.21, 116.11 (d,  $J$  = 21.87 Hz), 95.26, 85.10,  $^{19}F$  NMR (500 MHz,  $CDCl_3$ ):  $\delta$  -107.30, HRMS (ESI) exact mass calcd. for  $C_{18}H_9ClFNOH$  310.0435 (M+H)<sup>+</sup>, found: 310.0494 (M+H)<sup>+</sup>.

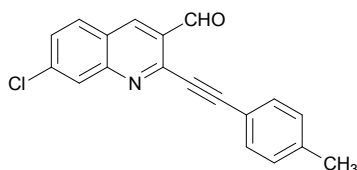

**7-chloro-2-(p-tolyethynyl)quinoline-3-carbaldehyde (4s):** 2,7-dichloroquinoline-3-carbaldehyde (0.11 g, 0.50 mmol), 1-ethynyl-4-methylbenzene (0.52 mmol), TEA (1.0 mmol), Reaction time: 3 h, yield: 0.13 g, 84%, white solid, mp: 150 °C, IR (KBr):  $\nu$  2209, 1680  $cm^{-1}$ ,  $^1H$  NMR (500 MHz,  $CDCl_3$ ):  $\delta$  10.78 (s, 1H), 8.70 (s, 1H), 8.16 (s, 1H), 7.89 (d,  $J$  = 9.0 Hz, 1H), 7.60-7.56 (m, 3H), 7.23 (d,  $J$  = 7.5 Hz, 2H), 2.41 (s, 3H),  $^{13}C$  NMR (125 MHz,  $CDCl_3$ ):  $\delta$  190.50, 150.44, 145.18, 140.60, 139.30, 136.77, 132.30, 130.70, 129.42, 129.22, 128.86, 128.29, 124.72, 118.02, 96.88, 84.89, 21.69, HRMS (ESI) exact mass calcd. for  $C_{19}H_{12}ClNOH$ : 306.0686 (M+H)<sup>+</sup>, found 306.0698 (M+H)<sup>+</sup>.

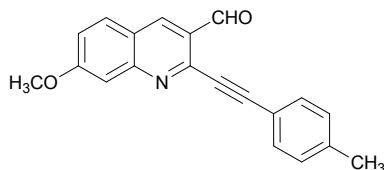

**7-methoxy-2-(p-tolyethynyl)quinoline-3-carbaldehyde (4t):** 2-chloro-7-methoxyquinoline-3-carbaldehyde (0.11 g, 0.50 mmol), 1-ethynyl-4-methylbenzene (0.52 mmol), TEA (1.0 mmol), Reaction time: 3 h, yield: 0.13 g, 85%, white solid, mp: 178 °C, IR (KBr):  $\nu$  2211, 1691  $cm^{-1}$ ,  $^1H$  NMR (500 MHz,  $CDCl_3$ ):  $\delta$  10.74 (s, 1H), 8.64 (s, 1H), 7.82 (d,  $J$  = 9.0, 1H), 7.58 (d,  $J$  = 8.0 Hz, 2H), 7.46 (s, 1H), 7.26-7.21 (m, 3H), 3.98 (s, 3H), 2.40 (s, 3H),  $^{13}C$  NMR (125 MHz,  $CDCl_3$ ):  $\delta$  190.86, 163.74, 152.46, 144.86, 140.33, 136.40, 132.30, 130.81, 130.80, 129.44, 127.36, 121.83, 118.44, 107.15, 95.84, 85.25, 55.90, 21.75, HRMS (ESI) exact mass calcd. for  $C_{20}H_{15}NO_2H$ : 302.1181 (M+H)<sup>+</sup>, found 302.1171 (M+H)<sup>+</sup>.

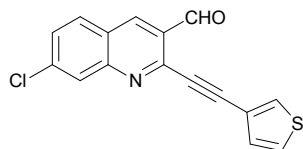

**7-chloro-2-(thiophen-3-ylethynyl)quinoline-3-carbaldehyde (4w):** 2,7-dichloroquinoline-3-carbaldehyde (0.11 g, 0.50 mmol), 3-ethynylthiophene (0.52 mmol), TEA (1.0 mmol), Reaction time: 3 h, yield: 0.12 g, 83%, white solid, mp: 156 °C, IR (KBr):  $\nu$  2218, 1680  $cm^{-1}$ ,  $^1H$  NMR (500 MHz,  $CDCl_3$ ):  $\delta$  10.75 (s, 1H), 8.71 (s, 1H), 8.15 (s, 1H), 7.90 (d,  $J$  = 9.0 Hz, 1H), 7.80 (s, 1H), 7.59-7.56 (m, 1H), 7.39-7.34 (m, 2H),  $^{13}C$  NMR (125 MHz,  $CDCl_3$ ):  $\delta$  190.46, 150.49, 145.06, 139.47, 136.96, 132.00, 130.81, 130.04, 129.40, 128.87, 128.36, 126.16, 124.83, 120.34, 91.75, 85.21, HRMS (ESI) exact mass calcd. for  $C_{16}H_8ClNOSH$ : 298.0093 (M+H)<sup>+</sup>, found 298.0101 (M+H)<sup>+</sup>.



## Representative procedure for the synthesis of 1-trifluoromethyl-1,3-dihydro-furo[3,4-b]quinolines

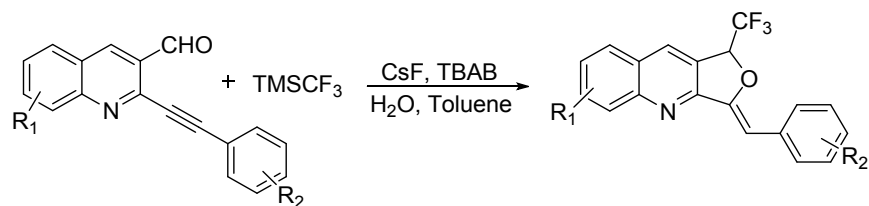

Solution of 2-arylquinoline-3-carbaldehyde (0.25 mmol),  $\text{TMSCF}_3$  (0.30 mmol), cesium fluoride (0.25 mmol), TBAB (10 mol%) and Toluene (2 mL) was stirred at 0°C for 1-2 h (as monitored by TLC).  $\text{H}_2\text{O}$  (0.50 mmol) was added and mixture was stirred at rt for 1 h. The mixture was then extracted with EtOAc. Organic phase was washed with water, brine and dried over  $\text{Na}_2\text{SO}_4$ . Solvent was then removed under reduced pressure and the residue obtained was purified by column chromatography (hexane: ethyl acetate (18:2) to afford 5(a-x).

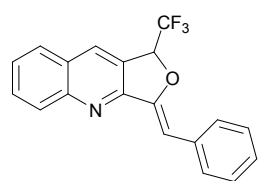

**3-Benzylidene-1-trifluoromethyl-1,3-dihydro-furo[3,4-b]quinoline (5a):** 2-(phenylethynyl)quinoline-3-carbaldehyde (0.06 g, 0.25 mmol),  $\text{TMSCF}_3$  (0.30 mmol), CsF (0.04 g, 0.25 mmol) Reaction time: 2 h, yield: 0.07 g, 88%, yellow solid, mp: 158 °C, IR (KBr):  $\nu$  1618, 1275, 1133, 1051, 751  $\text{cm}^{-1}$ ,  $^1\text{H}$  NMR (500 MHz,  $\text{CDCl}_3$ ):  $\delta$  8.18 (s, 1H), 8.10 (d,  $J$  = 8.0 Hz, 1H), 7.82-7.78 (m, 3H), 7.74 (t,  $J$  = 7.5 Hz, 1H), 7.53 (t,  $J$  = 7.0 Hz, 1H), 7.34 (t,  $J$  = 7.0 Hz, 1H), 7.20 (t,  $J$  = 7.0 Hz, 2H),

6.74 (s, 1H), 5.94 (q,  $J$  = 6.0 Hz, 1H),  $^{13}\text{C}$  NMR (125 MHz,  $\text{CDCl}_3$ ):  $\delta$  154.16, 151.03, 150.04, 134.49, 131.29, 131.20, 129.57, 129.43, 128.67, 128.47, 127.46, 127.34, 124.45, 124.07, 121.84, 102.51, 79.31 (q,  $J$  = 35.12 Hz),  $^{19}\text{F}$  NMR (500 MHz,  $\text{CDCl}_3$ ):  $\delta$  -77.92, HRMS (ESI) exact mass calcd. for  $\text{C}_{19}\text{H}_{12}\text{F}_3\text{NOH}$ : 328.0949 (M+H) $^+$ , found: 328.0957 (M+H) $^+$ .

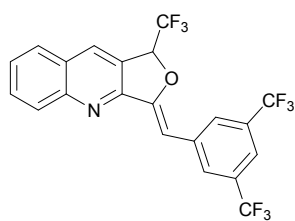

**3-(3,5-Bis-trifluoromethyl-benzylidene)-1-trifluoromethyl-1,3-dihydro-furo[3,4-b]quinoline (5b):**

2-((3,5-bis(trifluoromethyl)phenyl)ethynyl)quinoline-3-carbaldehyde (0.09 g, 0.25 mmol),  $\text{TMSCF}_3$  (0.30 mmol), CsF (0.04 g, 0.25 mmol), Reaction time: 2 h, yield: 0.10 g, 90%, yellow solid, mp: 200 °C, IR (KBr):  $\nu$  1618, 1287, 1130, 1052, 895  $\text{cm}^{-1}$ ,  $^1\text{H}$  NMR (500 MHz,  $\text{CDCl}_3$ ):  $\delta$  8.31 (s, 1H), 8.26 (s, 2H), 8.19 (d,  $J$  = 8.5 Hz, 1H), 7.92 (d,  $J$  = 7.5 Hz, 1H), 7.86-7.83 (m, 1H), 7.73 (s, 1H), 7.65 (t,  $J$  = 8.5 Hz, 1H), 6.85 (s, 1H), 6.08 (q,  $J$  = 5.5 Hz, 1H),

$^{13}\text{C}$  NMR (125 MHz,  $\text{CDCl}_3$ ):  $\delta$  153.64, 153.02, 150.11, 136.59, 131.92 (q,  $J$  = 32.87 Hz), 129.80, 128.64, 128.52, 127.96, 127.74, 124.37, 123.83, 122.42, 120.25, 120.22, 120.19, 99.34, 79.91 (q,  $J$  = 35.62 Hz),  $^{19}\text{F}$  NMR (500 MHz,  $\text{CDCl}_3$ ):  $\delta$  -62.99, -77.95, HRMS (ESI) exact mass calcd. for  $\text{C}_{21}\text{H}_{10}\text{F}_9\text{NOH}$ : 464.0697 (M+H) $^+$ , found: 464.0710 (M+H) $^+$ .

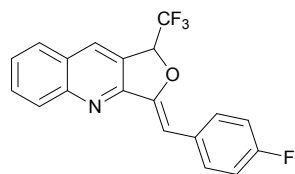

**3-(4-Fluoro-benzylidene)-1-trifluoromethyl-1,3-dihydro-furo[3,4-b]quinoline (5c):**

2-((4-fluorophenyl)ethynyl)quinoline-3-carbaldehyde (0.06 g, 0.25 mmol),  $\text{TMSCF}_3$  (0.30 mmol), CsF (0.04 g, 0.25 mmol), Reaction time: 2 h, yield: 0.07 g, 89%, yellow solid, mp: 128°C, IR (KBr):  $\nu$  1618, 1275, 1133, 751  $\text{cm}^{-1}$ ,  $^1\text{H}$  NMR (500 MHz,  $\text{CDCl}_3$ ):  $\delta$  8.24 (s, 1H), 8.16 (d,  $J$  = 8.5 Hz, 1H), 7.88 (d,

$J$  = 8.0 Hz, 1H), 7.84-7.79 (m, 3H), 7.60 (t,  $J$  = 7.0 Hz, 1H), 7.09 (t,  $J$  = 8.5 Hz, 2H), 6.78 (s, 1H), 6.00 (q,  $J$  = 6.0 Hz, 1H),  $^{13}\text{C}$  NMR (125 MHz,  $\text{CDCl}_3$ ):  $\delta$  161.80 (d,  $J$  = 246.25 Hz), 153.90, 150.50 (d,  $J$  = 2.00 Hz), 149.94, 131.17 (d,  $J$  = 9.50 Hz), 130.95 (d,  $J$  = 7.87 Hz), 130.61 (d,  $J$  = 3.00 Hz), 129.44, 128.38, 127.37, 127.26, 124.26, 123.96, 121.72, 115.54 (d,  $J$  = 21.25 Hz), 101.31, 79.23 (q,  $J$  = 35.12 Hz),  $^{19}\text{F}$  NMR (500 MHz,  $\text{CDCl}_3$ ):  $\delta$  -77.95, -113.51, HRMS (ESI) exact mass calcd. for  $\text{C}_{19}\text{H}_{11}\text{F}_4\text{NOH}$ : 346.0855 (M+H) $^+$ , found:

346.0865 (M+H)<sup>+</sup>.

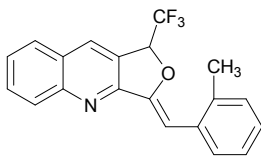

**3-(2-methylbenzylidene)-1-(trifluoromethyl)-1,3-dihydrofuro[3,4-b]quinoline (5d):** 2-(o-tolyethynyl)quinoline-3-carbaldehyde (0.13 g, 0.50 mmol), TMSF<sub>3</sub> (0.60 mmol), CsF (0.08 g, 0.50 mmol), Reaction time: 3 h, yield: 0.12 g, 75%, light green solid, mp: 98 °C, IR (KBr):  $\nu$  1620, 1258, 1138, 1041, 710 cm<sup>-1</sup>, <sup>1</sup>H NMR (500 MHz, CDCl<sub>3</sub>):  $\delta$  8.23 (s, 1H), 8.18 (d, *J* = 8.0 Hz, 2H), 7.87 (d, *J* = 8.0 Hz, 1H), 7.80 (t, *J* = 7.0 Hz, 1H), 7.58 (t, *J* = 8.5 Hz, 2H), 7.29-7.16 (m, 3H), 6.99 (s, 1H), 5.97 (q, *J* = 6.0 Hz, 1H), 2.54 (s, 3H), <sup>13</sup>C NMR (125 MHz, CDCl<sub>3</sub>):  $\delta$  154.21, 151.11, 150.07, 136.72, 132.90, 131.23, 131.08, 130.33, 129.64, 129.39, 128.43, 127.37, 127.27, 126.16, 124.43, 124.11, 121.87, 99.32, 79.15 (q, *J* = 34.87 Hz), 20.57, <sup>19</sup>F NMR (500 MHz, CDCl<sub>3</sub>):  $\delta$  -77.86, HRMS (ESI) exact mass calcd. for C<sub>20</sub>H<sub>14</sub>F<sub>3</sub>NOH: 342.1106 (M+H)<sup>+</sup>, found 342.1116 (M+H)<sup>+</sup>.

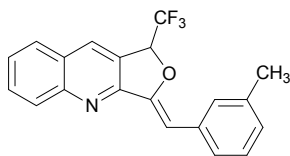

**3-(3-Methyl-benzylidene)-1-trifluoromethyl-1,3-dihydro-furo[3,4-b]quinoline (5e):** 2-(m-tolyethynyl)quinoline-3-carbaldehyde (0.13 g, 0.50 mmol), TMSF<sub>3</sub> (0.60 mmol), CsF (0.08 g, 0.50 mmol), Reaction time: 3 h, yield: 0.12 g, 74%, yellow solid, mp: 95 °C, IR (KBr):  $\nu$  1618, 1272, 1141, 1052, 693 cm<sup>-1</sup>, <sup>1</sup>H NMR (500 MHz, CDCl<sub>3</sub>):  $\delta$  8.24 (s, 1H), 8.17 (d, *J* = 8.5 Hz, 1H), 7.88 (d, *J* = 8.0 Hz, 1H), 7.80 (t, *J* = 8.0 Hz, 1H), 7.67 (t, *J* = 8.0 Hz, 2H), 7.59 (t, *J* = 8.0 Hz, 1H), 7.30 (t, *J* = 7.5 Hz, 1H), 7.09 (d, *J* = 7.5 Hz, 1H), 6.79 (s, 1H), 6.01 (q, *J* = 5.5 Hz, 1H), 2.40 (s, 3H), <sup>13</sup>C NMR (125 MHz, CDCl<sub>3</sub>):  $\delta$  154.23, 150.89, 150.05, 138.13, 134.40, 131.25, 131.15, 130.12, 129.57, 128.56, 128.46, 128.23, 127.28, 126.59, 124.47, 124.09, 121.85, 102.67, 79.26 (q, *J* = 35.00 Hz), 21.65, <sup>19</sup>F NMR (500 MHz, CDCl<sub>3</sub>):  $\delta$  -77.93, HRMS (ESI) exact mass calcd. for C<sub>20</sub>H<sub>14</sub>F<sub>3</sub>NOH: 342.1106 (M+H)<sup>+</sup>, found 342.1114 (M+H)<sup>+</sup>.

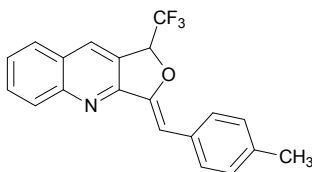

**3-(4-Methyl-benzylidene)-1-trifluoromethyl-1,3-dihydro-furo[3,4-b]quinoline (5f):** 2-(p-tolyethynyl)quinoline-3-carbaldehyde (0.13 g, 0.50 mmol), TMSF<sub>3</sub> (0.60 mmol), CsF (0.08 g, 0.50 mmol), Reaction time: 3 h, yield: 0.11 g, 70 %, yellow solid, mp: 138 °C, IR (KBr):  $\nu$  1615, 1175, 1043, 753 cm<sup>-1</sup>, <sup>1</sup>H NMR (500 MHz, CDCl<sub>3</sub>):  $\delta$  8.22 (s, 1H), 8.16 (d, *J* = 8.5 Hz, 1H), 7.87 (d, *J* = 8.0 Hz, 1H), 7.80 (t, *J* = 7.5 Hz, 1H), 7.75 (d, *J* = 8.0 Hz, 2H), 7.58 (t, *J* = 7.0 Hz, 1H), 7.22 (d, *J* = 8.0 Hz, 2H), 6.79 (s, 1H), 5.99 (q, *J* = 5.5 Hz, 1H), 2.38 (s, 3H), <sup>13</sup>C NMR (125 MHz, CDCl<sub>3</sub>):  $\delta$  154.29, 150.41, 150.03, 137.24, 131.66, 131.20, 131.11, 129.51, 129.39, 128.44, 127.39, 127.18, 124.46, 124.10, 121.87, 102.61, 79.21 (q, *J* = 35.00 Hz), 21.48, <sup>19</sup>F NMR (500 MHz, CDCl<sub>3</sub>):  $\delta$  -77.94, HRMS (ESI) exact mass calcd. for C<sub>20</sub>H<sub>14</sub>F<sub>3</sub>NOH: 342.1106 (M+H)<sup>+</sup>, found 342.1113 (M+H)<sup>+</sup>.

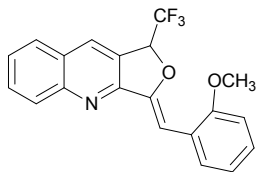

**3-(2-methoxybenzylidene)-1-(trifluoromethyl)-1,3-dihydrofuro[3,4-b]quinoline (5g):** 2-((2-methoxyphenyl)ethynyl)quinoline-3-carbaldehyde (0.07 g, 0.25 mmol), TMSF<sub>3</sub> (0.30 mmol), CsF (0.04 g, 0.25 mmol), Reaction time 2 h, yield: 0.06 g, 73%, yellow solid, mp: 120 °C, IR (KBr):  $\nu$  1514, 1233, 1160, 1049, 724 cm<sup>-1</sup>, <sup>1</sup>H NMR (500 MHz, CDCl<sub>3</sub>):  $\delta$  8.26-8.23 (m, 1H), 8.19 (d, *J* = 8.5 Hz, 1H), 7.87 (d, *J* = 8.0 Hz, 1H), 7.81-7.78 (m, 1H), 7.58 (t, *J* = 7.0 Hz, 1H), 7.30 (s, 1H), 7.27-7.24 (m, 2H), 7.04 (t, *J* = 7.5 Hz, 1H), 6.92 (d, *J* = 8.5 Hz, 1H), 5.99 (q, *J* = 5.5 Hz, 1H), 3.93 (s, 3H), <sup>13</sup>C NMR (125 MHz, CDCl<sub>3</sub>):  $\delta$  157.04, 154.44, 151.03, 150.12, 131.11, 131.00, 130.14, 129.70, 128.57, 128.39, 127.37, 127.14, 124.44, 124.12, 123.44, 120.73, 110.47, 96.22, 79.16 (q, *J* = 35.12 Hz), 55.63, <sup>19</sup>F NMR (500 MHz, CDCl<sub>3</sub>):  $\delta$  -77.93, HRMS (ESI) exact mass calcd. for C<sub>20</sub>H<sub>14</sub>F<sub>3</sub>NO<sub>2</sub>H: 358.1055 (M+H)<sup>+</sup>, found 358.1081 (M+H)<sup>+</sup>.

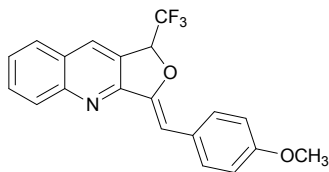

**3-(4-Methoxy-benzylidene)-1-trifluoromethyl-1,3-dihydro-furo[3,4-b]quinoline (5h):**

2-((4-methoxyphenyl)ethynyl)quinoline-3-carbaldehyde (0.07 g, 0.25 mmol),  $\text{TMSCF}_3$  (0.30 mmol), CsF (0.04 g, 0.25 mmol), Reaction time 2 h, yield: 0.07 g, 76%, light green solid, mp: 154 °C, IR (KBr):  $\nu$  1514, 1239, 1177, 1052, 751  $\text{cm}^{-1}$ ,  $^1\text{H}$  NMR (500 MHz,  $\text{CDCl}_3$ ):  $\delta$  8.14 (s, 1H), 8.08 (d,  $J$  = 8.5 Hz, 1H), 7.79 (d,  $J$  = 8.0 Hz, 1H), 7.74-7.70 (m, 3H), 7.50 (t,  $J$  = 7.0 Hz, 1H), 6.88 (d,  $J$  = 9.0 Hz, 2H), 6.70 (s, 1H), 5.92 (q,  $J$  = 5.5 Hz, 1H), 3.77 (s, 3H),  $^{13}\text{C}$  NMR (125 MHz,  $\text{CDCl}_3$ ):  $\delta$  158.96, 154.36, 150.02, 149.53, 131.20, 131.11, 130.85, 129.43, 128.46, 127.32, 127.09, 124.40, 124.11, 121.88, 114.17, 102.36, 79.13 (q,  $J$  = 35.00 Hz), 55.39,  $^{19}\text{F}$  NMR (500 MHz,  $\text{CDCl}_3$ ):  $\delta$  -77.01, HRMS (ESI) exact mass calcd. for  $\text{C}_{20}\text{H}_{14}\text{F}_3\text{NO}_2\text{H}$ : 358.1055 (M+H)<sup>+</sup>, found 358.1063 (M+H)<sup>+</sup>.

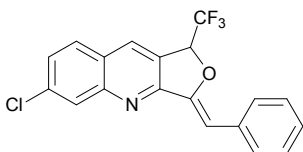

**3-Benzylidene-6-chloro-1-trifluoromethyl-1,3-dihydro-furo[3,4-b]quinoline**

**(5i):** 7-chloro-2-(phenylethynyl)quinoline-3-carbaldehyde (0.07 g, 0.25 mmol),  $\text{TMSCF}_3$  (0.30 mmol), CsF (0.04 g, 0.25 mmol), Reaction time: 2 h, Yield: 0.08 g, 87 %, yellow solid, mp: 145 °C, IR (KBr):  $\nu$  1600, 1218, 1170, 1051, 849  $\text{cm}^{-1}$ ,  $^1\text{H}$  NMR (500 MHz,  $\text{CDCl}_3$ ):  $\delta$  8.17 (s, 1H), 8.14 (s, 1H), 7.83 (d,  $J$  = 8.0 Hz, 2H), 7.77 (d,  $J$  = 8.5 Hz, 1H), 7.51 (d,  $J$  = 8.5 Hz, 1H), 7.39 (t,  $J$  = 7.5 Hz, 2H), 7.28-7.24 (m, 1H), 6.78 (s, 1H), 5.95 (q,  $J$  = 5.0 Hz, 1H),  $^{13}\text{C}$  NMR (125 MHz,  $\text{CDCl}_3$ ):  $\delta$  155.00, 150.55, 150.28, 137.12, 134.16, 130.99, 129.41, 128.58, 128.41, 128.19, 127.45, 125.68, 124.59, 123.86, 121.62, 103.13, 79.18 (q,  $J$  = 35.12 Hz),  $^{19}\text{F}$  NMR (500 MHz,  $\text{CDCl}_3$ ):  $\delta$  -77.87, HRMS (ESI) exact mass calcd. for  $\text{C}_{19}\text{H}_{11}\text{ClF}_3\text{NOH}$  362.0560 (M+H)<sup>+</sup>, found: 362.0567 (M+H)<sup>+</sup>.

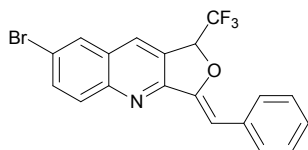

**3-Benzylidene-7-bromo-1-trifluoromethyl-1,3-dihydro-furo[3,4-b]quinoline**

**(5j):** 6-bromo-2-(phenylethynyl)quinoline-3-carbaldehyde (0.08 g, 0.25 mmol),  $\text{TMSCF}_3$  (0.30 mmol), CsF (0.04 g, 0.25 mmol), Reaction time: 2 h, yield: 0.08 g, 82%, yellow solid, mp: 156 °C, IR (KBr):  $\nu$  1619, 1264, 1174, 1050, 846  $\text{cm}^{-1}$ ,  $^1\text{H}$  NMR (500 MHz,  $\text{CDCl}_3$ ):  $\delta$  8.13 (s, 1H), 8.03 (d,  $J$  = 9.0, 2H), 7.86-7.82 (m, 3H), 7.40 (t,  $J$  = 7.0 Hz, 2H), 7.27 (t,  $J$  = 7.5 Hz, 1H), 6.79 (s, 1H), 6.00 (q,  $J$  = 6.0 Hz, 1H),  $^{13}\text{C}$  NMR (125 MHz,  $\text{CDCl}_3$ ):  $\delta$  154.55, 150.67, 148.66, 134.63, 134.29, 131.09, 130.46, 130.21, 129.49, 128.70, 128.46, 127.55, 125.37, 123.96, 121.28, 103.12, 79.11 (q,  $J$  = 35.00 Hz),  $^{19}\text{F}$  NMR (500 MHz,  $\text{CDCl}_3$ ):  $\delta$  -77.87, HRMS (ESI) exact mass calcd. for  $\text{C}_{19}\text{H}_{11}\text{BrF}_3\text{NOH}$ : 406.0054 (M+H)<sup>+</sup>, found 406.0062 (M+H)<sup>+</sup>.

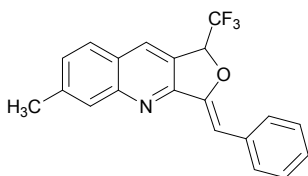

**3-Benzylidene-6-methyl-1-trifluoromethyl-1,3-dihydro-furo[3,4-b]quinoline**

**(5k) :** 7-methyl-2-(phenylethynyl)quinoline-3-carbaldehyde (0.13 g, 0.50 mmol),  $\text{TMSCF}_3$  (0.60 mmol), CsF (0.08 g, 0.50 mmol), Reaction time: 3 h, yield: 0.13 g, 75%, yellow solid, mp: 130 °C, IR (KBr):  $\nu$  1614, 1261, 1176, 1048, 851  $\text{cm}^{-1}$ ,  $^1\text{H}$  NMR (500 MHz,  $\text{CDCl}_3$ ):  $\delta$  8.18 (s, 1H), 7.95 (s, 1H), 7.84 (d,  $J$  = 7.5, 2H), 7.76 (d,  $J$  = 8.5, 1H), 7.43-7.38 (m, 3H), 7.26 (t,  $J$  = 7.5 Hz, 1H), 6.78 (s, 1H), 5.97 (q,  $J$  = 5.5 Hz, 1H), 2.59 (s, 3H),  $^{13}\text{C}$  NMR (125 MHz,  $\text{CDCl}_3$ ):  $\delta$  154.06, 151.21, 150.30, 141.83, 134.60, 130.90, 129.64, 129.38, 128.64, 128.02, 127.24, 125.60, 124.12, 123.64, 121.89, 102.20, 79.33 (q,  $J$  = 35.00 Hz), 22.03,  $^{19}\text{F}$  NMR (500 MHz,  $\text{CDCl}_3$ ):  $\delta$  -77.98, HRMS (ESI) exact mass calcd. for  $\text{C}_{20}\text{H}_{14}\text{F}_3\text{NOH}$ : 342.1106 (M+H)<sup>+</sup>, found 342.1121 (M+H)<sup>+</sup>.

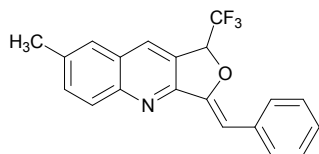

### 3-Benzylidene-7-methyl-1-trifluoromethyl-1,3-dihydro-furo[3,4-b]quinoline

**(5l):** 6-methyl-2-(phenylethynyl)quinoline-3-carbaldehyde (0.13 g, 0.50 mmol),  $\text{TMSCF}_3$  (0.60 mmol), CsF (0.08 g, 0.50 mmol), Reaction time: 3 h, Yield: 0.13 g, 77 %, yellow solid, mp: 155 °C, IR (KBr):  $\nu$  1622, 1275, 1127, 1047, 826  $\text{cm}^{-1}$ ,  $^1\text{H}$  NMR (500 MHz,  $\text{CDCl}_3$ ):  $\delta$  8.10 (s, 1H), 8.04 (d,  $J = 8.5$ , 1H), 7.83 (d,  $J = 7.5$  Hz,

2H), 7.61 (d,  $J = 8.5$  Hz, 2H), 7.39 (t,  $J = 7.5$  Hz, 2H), 7.25 (t,  $J = 7.0$  Hz, 1H), 6.75 (s, 1H), 5.94 (q,  $J = 6.0$  Hz, 1H), 2.53 (s, 3H),  $^{13}\text{C}$  NMR (125 MHz,  $\text{CDCl}_3$ ):  $\delta$  153.26, 151.19, 148.62, 137.52, 134.62, 133.53, 130.50, 129.35, 129.14, 128.66, 127.34, 127.21, 124.43, 124.11, 121.87, 101.96, 79.30 (q,  $J = 34.87$  Hz), 21.68,  $^{19}\text{F}$  NMR (500 MHz,  $\text{CDCl}_3$ ):  $\delta$  -77.94, HRMS (ESI) exact mass calcd. for  $\text{C}_{20}\text{H}_{14}\text{F}_3\text{NOH}$ : 342.1106 (M+H)<sup>+</sup>, found 342.1121 (M+H)<sup>+</sup>.

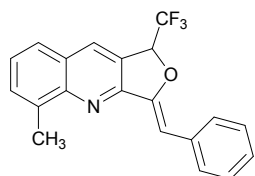

### 3-Benzylidene-5-methyl-1-trifluoromethyl-1,3-dihydro-furo[3,4-b]quinoline

**(5m):** 8-methyl-2-(phenylethynyl)quinoline-3-carbaldehyde (0.07 g, 0.25 mmol),  $\text{TMSCF}_3$  (0.30 mmol), CsF (0.04 g, 0.25 mmol), Reaction time: 3 h, yield: 0.06 g, 72%, yellow solid, mp: 110 °C, IR (KBr):  $\nu$  1619, 1272, 1130, 1057, 847  $\text{cm}^{-1}$ ,  $^1\text{H}$  NMR (500 MHz,  $\text{CDCl}_3$ ):  $\delta$  8.21 (s, 1H), 7.86 (d,  $J = 7.5$ , 2H), 7.70 (d,  $J = 8.5$  Hz, 1H), 7.64 (d,  $J = 7.0$  Hz, 1H), 7.48 (t,  $J = 7.5$  Hz, 1H), 7.41 (t,  $J = 7.5$  Hz, 2H), 7.27 (t,  $J =$

7.0 Hz, 1H), 6.82 (s, 1H), 6.01 (q,  $J = 5.5$  Hz, 1H), 2.89 (s, 3H),  $^{13}\text{C}$  NMR (125 MHz,  $\text{CDCl}_3$ ):  $\delta$  152.95, 151.50, 149.13, 137.81, 134.67, 131.33, 131.12, 129.35, 128.64, 127.42, 127.15, 127.05, 126.35, 123.95, 121.90, 101.84, 79.36 (q,  $J = 34.75$  Hz), 18.10,  $^{19}\text{F}$  NMR (500 MHz,  $\text{CDCl}_3$ ):  $\delta$  -77.93, HRMS (ESI) exact mass calcd. for  $\text{C}_{20}\text{H}_{14}\text{F}_3\text{NOH}$ : 342.1106 (M+H)<sup>+</sup>, found 342.1119 (M+H)<sup>+</sup>.

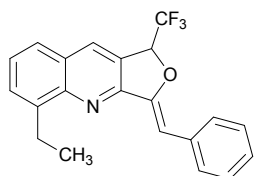

### 3-Benzylidene-5-ethyl-1-trifluoromethyl-1,3-dihydro-furo[3,4-b]quinoline (5n):

8-ethyl-2-(phenylethynyl)quinoline-3-carbaldehyde (0.07 g, 0.25 mmol),  $\text{TMSCF}_3$  (0.30 mmol), CsF (0.04 g, 0.25 mmol), Reaction time: 4 h, yield: 0.06 g, 70%, yellow solid, mp: 85 °C, IR (KBr):  $\nu$  1621, 1273, 1135, 1047, 690  $\text{cm}^{-1}$ ,  $^1\text{H}$  NMR (500 MHz,  $\text{CDCl}_3$ ):  $\delta$  8.19 (s, 1H), 7.86 (d,  $J = 8.0$  Hz, 2H), 7.70 (d,  $J = 8.0$  Hz, 1H), 7.64 (d,  $J = 7.0$  Hz, 1H), 7.50 (t,  $J = 7.5$  Hz, 1H), 7.40 (t,  $J = 7.5$  Hz, 2H), 7.26 (t,  $J = 8.0$  Hz,

1H), 6.79 (s, 1H), 5.99 (q,  $J = 5.5$  Hz, 1H), 3.39 (q,  $J = 7.5$  Hz, 2H), 1.43 (t,  $J = 7.5$  Hz, 3H),  $^{13}\text{C}$  NMR (125 MHz,  $\text{CDCl}_3$ ):  $\delta$  152.77, 151.48, 148.45, 143.50, 134.62, 131.25, 129.39, 129.24, 128.52, 127.40, 127.02, 126.20, 124.06, 123.80, 121.83, 101.64, 79.28 (q,  $J = 34.87$  Hz), 24.54, 15.09,  $^{19}\text{F}$  NMR (500 MHz,  $\text{CDCl}_3$ ):  $\delta$  -77.91, HRMS (ESI) exact mass calcd. for  $\text{C}_{21}\text{H}_{16}\text{F}_3\text{NOH}$ : 356.1262 (M+H)<sup>+</sup>, found 356.1277 (M+H)<sup>+</sup>.

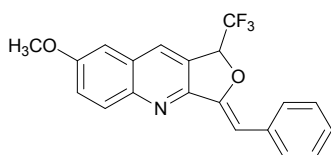

### 3-Benzylidene-7-methoxy-1-trifluoromethyl-1,3-dihydro-furo[3,4-b]quinoline

**(5o):** 6-methoxy-2-(phenylethynyl)quinoline-3-carbaldehyde (0.07 g, 0.25 mmol),  $\text{TMSCF}_3$  (0.30 mmol), CsF (0.04 g, 0.25 mmol), Reaction time: 2 h, Yield: 0.07 g, 76%, yellow solid, mp: 160 °C, IR (KBr):  $\nu$  1625, 1223, 1168, 1036, 836  $\text{cm}^{-1}$ ,  $^1\text{H}$  NMR (500 MHz,  $\text{CDCl}_3$ ):  $\delta$  8.06 (s, 1H), 7.99 (d,  $J = 9.0$ , 1H), 7.76 (d,  $J =$

7.5, 2 H), 7.40-7.37 (m, 1H), 7.32 (t,  $J = 7.5$  Hz, 2H), 7.18 (t,  $J = 7.5$  Hz, 1H), 7.06 (s, 1H), 6.65 (s, 1H), 5.91 (q,  $J = 6.0$  Hz, 1H) 3.94 (s, 3H),  $^{13}\text{C}$  NMR (125 MHz,  $\text{CDCl}_3$ ):  $\delta$  158.50, 151.90, 151.23, 146.20, 134.70, 130.88, 129.66, 129.26, 128.72, 128.62, 127.07, 124.85, 124.11, 121.88, 105.88, 101.42, 79.32 (q,  $J = 35.12$  Hz), 55.76,  $^{19}\text{F}$  NMR (500 MHz,  $\text{CDCl}_3$ ):  $\delta$  -77.88, HRMS (ESI) exact mass calcd. for  $\text{C}_{20}\text{H}_{14}\text{F}_3\text{NO}_2\text{H}$ : 358.1055 (M+H)<sup>+</sup>, found 358.1069 (M+H)<sup>+</sup>.

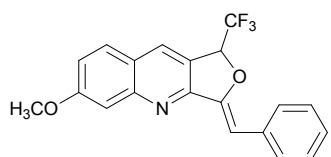

### 3-Benzylidene-6-methoxy-1-trifluoromethyl-1,3-dihydro-furo[3,4-b]quinoline

**(5p):** 7-methoxy-2-(phenylethynyl)quinoline-3-carbaldehyde (0.07 g, 0.25 mmol),  $\text{TMSCF}_3$  (0.30 mmol), CsF (0.04 g, 0.25 mmol), Reaction time: 2 h, Yield: 0.07 g, 74%, yellow solid, mp: 140 °C, IR (KBr):  $\nu$  1615, 1268, 1175, 1043, 849, 753  $\text{cm}^{-1}$ ,

$^1\text{H}$  NMR (500 MHz,  $\text{CDCl}_3$ ):  $\delta$  8.16 (s, 1H), 7.85 (d,  $J$  = 8.0 Hz, 2H), 7.76 (d,  $J$  = 9.5 Hz, 1H), 7.48 (s, 1H), 7.40 (t,  $J$  = 8.0 Hz, 2H), 7.28-7.24 (m, 2H), 6.76 (s, 1H), 5.98 (q,  $J$  = 6.0 Hz, 1H), 3.99 (s, 3H),  $^{13}\text{C}$  NMR (125 MHz,  $\text{CDCl}_3$ ):  $\delta$  162.13, 154.30, 152.03, 151.31, 134.58, 130.90, 129.35, 129.32, 128.65, 127.24, 124.13, 122.86, 122.39, 120.82, 107.28, 102.07, 79.38 (q,  $J$  = 35.12 Hz), 55.83,  $^{19}\text{F}$  NMR (500 MHz,  $\text{CDCl}_3$ ):  $\delta$  -78.06, HRMS (ESI) exact mass calcd. for  $\text{C}_{20}\text{H}_{14}\text{F}_3\text{NO}_2\text{H}$ : 358.1055 (M+H) $^+$ , found 358.1069 (M+H) $^+$ .

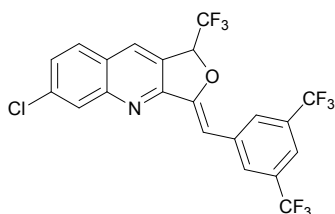

**3-(3,5-Bis-trifluoromethyl-benzylidene)-6-chloro-1-trifluoromethyl-1,3-dihydro-furo[3,4-b]quinoline (5q):** 2-((3,5-bis(trifluoromethyl)phenyl)ethynyl)-7-chloroquinoline-3-carbaldehyde (0.11 g, 0.25 mmol),  $\text{TMSCF}_3$  (0.30 mmol),  $\text{CsF}$  (0.04 g, 0.25 mmol), Reaction time: 2 h, yield: 0.01 g, 92%, yellow solid, mp: 160  $^\circ\text{C}$ , IR (KBr):  $\nu$  1608, 1291, 1175, 1051, 892  $\text{cm}^{-1}$ ,  $^1\text{H}$  NMR (500 MHz,  $\text{CDCl}_3$ ):  $\delta$  8.29 (s, 1H), 8.26(s, 2H), 8.19(s, 1H), 7.86(d,  $J$  = 9.0 Hz, 1H), 7.74 (s, 1H), 7.61-7.59 (m, 1H), 6.85 (s, 1H), 6.09 (q,  $J$  = 5.5 Hz, 1H),  $^{13}\text{C}$  NMR (125 MHz,  $\text{CDCl}_3$ ):  $\delta$  153.96, 153.17, 150.37, 137.60, 136.27, 131.89, (q,  $J$  = 33.00 Hz), 131.32, 129.46, 128.94, 128.66, 125.99, 124.54, 124.47, 123.63, 122.30, 120.37, 99.94, 79.78 (q,  $J$  = 35.00 Hz),  $^{19}\text{F}$  NMR (500 MHz,  $\text{CDCl}_3$ ):  $\delta$  -63.00, -77.92, HRMS (ESI) exact mass calcd. for  $\text{C}_{21}\text{H}_9\text{ClF}_9\text{NOH}$ : 498.0307 (M+H) $^+$ , found: 498.0319 (M+H) $^+$ .

$^1\text{H}$  NMR (500 MHz,  $\text{CDCl}_3$ ):  $\delta$  8.19 (s, 1H), 8.15 (s, 1H), 7.80 (t,  $J$  = 7.5 Hz, 3H), 7.53 (d,  $J$  = 10.0 Hz, 1H), 7.08 (t,  $J$  = 8.5 Hz, 2H), 6.75 (s, 1H), 5.98 (q,  $J$  = 5.0 Hz, 1H),  $^{13}\text{C}$  NMR (125 MHz,  $\text{CDCl}_3$ ):  $\delta$  161.93 (d,  $J$  = 246.62 Hz), 154.88, 150.28, 150.14, 137.20, 131.07 (d,  $J$  = 7.75 Hz), 130.38 (d,  $J$  = 3.12 Hz), 129.38, 128.33 (d,  $J$  = 17.5 Hz), 125.69, 124.50, 123.84, 121.80, 115.58 (d,  $J$  = 21.37 Hz), 102.02, 79.18 (q,  $J$  = 35.25 Hz),  $^{19}\text{F}$  NMR (500 MHz,  $\text{CDCl}_3$ ):  $\delta$  -77.92, -113.09, HRMS (ESI) exact mass calcd. for  $\text{C}_{19}\text{H}_{10}\text{ClF}_4\text{NOH}$ : 380.0465 (M+H) $^+$ , found: 380.0481(M+H) $^+$ .

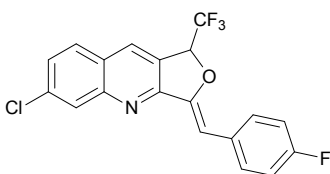

**6-Chloro-3-(4-fluoro-benzylidene)-1-trifluoromethyl-1,3-dihydro-furo[3,4-b]quinoline (5r):** 7-chloro-2-((4-fluorophenyl)ethynyl)quinoline-3-carbaldehyde (0.08 g, 0.25 mmol),  $\text{TMSCF}_3$  (0.30 mmol),  $\text{CsF}$  (0.04 g, 0.25 mmol), Reaction time: 2 h, yield: 0.08 g, 90 %, yellow solid, mp: 110  $^\circ\text{C}$ , IR (KBr):  $\nu$  1600, 1218, 1170, 1051, 849  $\text{cm}^{-1}$ ,  $^1\text{H}$  NMR (500 MHz,  $\text{CDCl}_3$ ):  $\delta$  8.19 (s, 1H), 8.15 (s, 1H), 7.80 (t,  $J$  = 7.5 Hz, 3H), 7.53 (d,  $J$  = 10.0

Hz, 1H), 7.08 (t,  $J$  = 8.5 Hz, 2H), 6.75 (s, 1H), 5.98 (q,  $J$  = 5.0 Hz, 1H),  $^{13}\text{C}$  NMR (125 MHz,  $\text{CDCl}_3$ ):  $\delta$  161.93 (d,  $J$  = 246.62 Hz), 154.88, 150.28, 150.14, 137.20, 131.07 (d,  $J$  = 7.75 Hz), 130.38 (d,  $J$  = 3.12 Hz), 129.38, 128.33 (d,  $J$  = 17.5 Hz), 125.69, 124.50, 123.84, 121.80, 115.58 (d,  $J$  = 21.37 Hz), 102.02, 79.18 (q,  $J$  = 35.25 Hz),  $^{19}\text{F}$  NMR (500 MHz,  $\text{CDCl}_3$ ):  $\delta$  -77.92, -113.09, HRMS (ESI) exact mass calcd. for  $\text{C}_{19}\text{H}_{10}\text{ClF}_4\text{NOH}$ : 380.0465 (M+H) $^+$ , found: 380.0481(M+H) $^+$ .

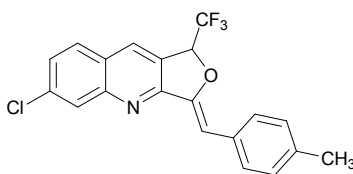

**6-Chloro-3-(4-methyl-benzylidene)-1-trifluoromethyl-1,3-dihydro-furo[3,4-b]quinoline (5s):** 7-chloro-2-(p-tolyethynyl)quinoline-3-carbaldehyde (0.08 g, 0.25 mmol),  $\text{TMSCF}_3$  (0.30 mmol),  $\text{CsF}$  (0.04 g, 0.25 mmol), Reaction time: 3 h, yield: 0.07 g, 80 %, yellow solid, mp: 135  $^\circ\text{C}$  IR (KBr):  $\nu$  1605, 1273, 1140, 1048, 849  $\text{cm}^{-1}$ ,  $^1\text{H}$  NMR (500 MHz,  $\text{CDCl}_3$ ):  $\delta$  8.18 (s, 1H), 8.15 (s, 1H), 7.78 (d,  $J$  = 8.5 Hz, 1H), 7.73 (d,  $J$  = 7.5 Hz, 2H),

7.53-7.51 (m, 1H), 7.21 (d,  $J$  = 8.0 Hz, 2H), 6.77 (s, 1H), 5.96 (q,  $J$  = 5.5 Hz, 1H) 2.38 (s, 3H),  $^{13}\text{C}$  NMR (125 MHz,  $\text{CDCl}_3$ ):  $\delta$  155.28, 150.41, 150.06, 137.62, 137.17, 131.43, 131.04, 129.48, 129.44, 128.49, 128.18, 125.73, 124.71, 123.99, 121.75, 103.35, 79.17 (q,  $J$  = 34.87 Hz), 21.50,  $^{19}\text{F}$  NMR (500 MHz,  $\text{CDCl}_3$ ):  $\delta$  -77.94, HRMS (ESI) exact mass calcd. for  $\text{C}_{20}\text{H}_{13}\text{ClF}_3\text{NOH}$ : 376.0716 (M+H) $^+$ , found 376.0724 (M+H) $^+$ .

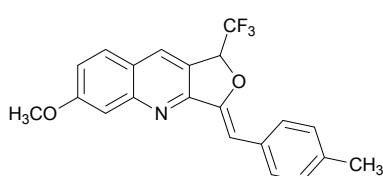

**6-Methoxy-3-(4-methyl-benzylidene)-1-trifluoromethyl-1,3-dihydro-furo[3,4-b]quinoline (5t):** 7-methoxy-2-(p-tolyethynyl)quinoline-3-carbaldehyde (0.07 g, 0.25 mmol),  $\text{TMSCF}_3$  (0.30 mmol),  $\text{CsF}$  (0.04 g, 0.25 mmol), Reaction time: 3 h; yield: 0.07 g, 73%, yellow solid, mp: 140 $^\circ\text{C}$ , IR (KBr):  $\nu$  1611, 1262, 1132, 1022, 853  $\text{cm}^{-1}$ ,  $^1\text{H}$  NMR (500 MHz,  $\text{CDCl}_3$ ):  $\delta$  8.13 (s, 1H), 7.75-7.72 (m, 3H), 7.46 (s, 1H), 7.17-7.12 (m, 3H),

6.73 (s, 1H), 5.95 (q,  $J$  = 5.5 Hz, 1H), 3.98 (s, 3H), 2.37 (s, 3H),  $^{13}\text{C}$  NMR (125 MHz,  $\text{CDCl}_3$ ):  $\delta$  162.09,

154.44, 152.02, 150.71, 137.22, 131.75, 130.81, 129.38, 129.30, 124.16, 122.78, 122.39, 121.92, 120.63, 107.22, 102.15, 79.29 (q,  $J = 34.87$  Hz), 55.79, 21.47,  $^{19}\text{F}$  NMR (500 MHz,  $\text{CDCl}_3$ ):  $\delta$  -78.15, HRMS (ESI) exact mass calcd. for  $\text{C}_{21}\text{H}_{16}\text{F}_3\text{NO}_2\text{H}$ : 372.1211 (M+H) $^+$ , found 372.1226 (M+H) $^+$

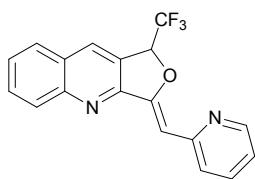

**3-(pyridin-2-ylmethylene)-1-(trifluoromethyl)-1,3-dihydrofuro[3,4-b]quinoline**

**(5u):** 2-(pyridin-2-ylethynyl)quinoline-3-carbaldehyde (0.13 g, 0.50 mmol),  $\text{TMSCF}_3$  (0.60 mmol), CsF (0.08 g, 0.50 mmol), Reaction time: 3 h, yield: 0.12 g 79%, brown solid, mp: 150°C, IR (KBr):  $\nu$  1668, 1268, 1132, 1050, 756  $\text{cm}^{-1}$ ,  $^1\text{H}$  NMR (500 MHz,  $\text{CDCl}_3$ ):  $\delta$  8.65 (s, 1H), 8.27 (s, 1H), 8.18 (d,  $J = 8.5$  Hz, 1H), 8.11 (d,  $J = 7.5$  Hz, 1H), 7.90 (d,  $J = 8.5$  Hz, 1H), 7.82 (t,  $J = 8.5$  Hz, 1H), 7.72 (t,  $J = 7.5$  Hz, 1H), 7.62 (t,  $J = 7.0$

Hz, 1H), 7.13 (t,  $J = 10.0$  Hz, 1H), 7.06 (s, 1H), 6.05 (q,  $J = 6.0$  Hz, 1H),  $^{13}\text{C}$  NMR (125 MHz,  $\text{CDCl}_3$ ):  $\delta$  153.99, 153.51, 153.42, 150.11, 149.66, 136.17, 131.84, 131.09, 129.98, 128.55, 128.28, 127.59, 127.55, 124.28, 121.29, 115.61, 103.13, 79.63 (q,  $J = 34.75$  Hz),  $^{19}\text{F}$  NMR (500 MHz,  $\text{CDCl}_3$ ):  $\delta$  -77.76, HRMS (ESI) exact mass calcd. for  $\text{C}_{18}\text{H}_{11}\text{F}_3\text{N}_2\text{OH}$ : 329.0902 (M+H) $^+$ , found 329.0915 (M+H) $^+$ .

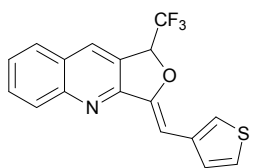

**3-(thiophen-3-ylmethylene)-1-(trifluoromethyl)-1,3-dihydrofuro[3,4-b]quinoline**

**(5v):** 2-(thiophen-3-ylethynyl)quinoline-3-carbaldehyde (0.06 g 0.25 mmol),  $\text{TMSCF}_3$  (0.30 mmol), CsF (0.04 g, 0.25 mmol), Reaction time: 3 h, yield: 0.06 g, 69%, yellow solid, mp: 140°C, IR (KBr):  $\nu$  1617, 1278, 1134, 1051, 758  $\text{cm}^{-1}$ ,  $^1\text{H}$  NMR (500 MHz,  $\text{CDCl}_3$ ):  $\delta$  8.16 (s, 1H), 8.08 (d,  $J = 8.5$  Hz, 1H), 7.80 (d,  $J = 8.0$  Hz, 1H), 7.72 (t,  $J = 8.0$

Hz, 1H), 7.63 (s, 1H), 7.51 (t,  $J = 7.5$  Hz, 1H), 7.45-7.44 (m, 1H), 7.28-7.26 (m, 1H), 6.82 (s, 1H), 5.92 (q,  $J = 5.5$  Hz, 1H),  $^{13}\text{C}$  NMR (125 MHz,  $\text{CDCl}_3$ ):  $\delta$  153.94, 150.23, 150.04, 135.35, 131.22, 131.16, 129.50, 128.81, 128.46, 127.39, 127.23, 125.35, 124.59, 124.07, 121.83, 97.15, 79.18 (q,  $J = 34.87$  Hz),  $^{19}\text{F}$  NMR (500 MHz,  $\text{CDCl}_3$ ):  $\delta$  -77.98, HRMS (ESI) exact mass calcd. for  $\text{C}_{17}\text{H}_{10}\text{F}_3\text{NOSH}$ : 334.0513 (M+H) $^+$ , found 334.0523 (M+H) $^+$ .

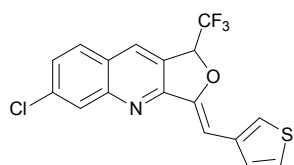

**6-Chloro-3-(thiophen-2-ylmethylene)-1-(trifluoromethyl)-1,3-dihydro-furo[3,4-b]quinoline**

**(5w):** 7-chloro-2-(thiophen-2-ylethynyl)quinoline-3-carbaldehyde (0.07 g, 0.25 mmol),  $\text{TMSCF}_3$  (0.30 mmol), CsF (0.04 g, 0.25 mmol), Reaction time: 2 h, yield: 0.06 g, 70%, yellow solid, mp: 120 °C, IR (KBr):  $\nu$  1618, 1271, 1140, 1048, 842  $\text{cm}^{-1}$ ,  $^1\text{H}$  NMR (500 MHz,  $\text{CDCl}_3$ ):  $\delta$  8.19 (s, 1H), 8.14 (s, 1H), 7.80 (d,  $J = 8.5$  Hz, 1H), 7.70 (s, 1H), 7.54-7.50 (m, 2H), 7.35-7.34 (m, 1H), 6.87 (s, 1H), 5.98 (q,  $J = 5.5$  Hz, 1H),  $^{13}\text{C}$  NMR (125 MHz,  $\text{CDCl}_3$ ):  $\delta$  154.85, 150.34, 149.80, 137.13, 135.09, 130.96, 129.38, 128.72, 128.41, 128.14, 125.64, 125.37, 124.90, 123.87, 121.64, 97.76, 79.04 (q,  $J = 34.87$  Hz),  $^{19}\text{F}$  NMR (500 MHz,  $\text{CDCl}_3$ ):  $\delta$  -78.01, HRMS (ESI) exact mass calcd. for  $\text{C}_{17}\text{H}_9\text{ClF}_3\text{NOSH}$ : 368.0124 (M+H) $^+$ , found: 368.0131(M+H) $^+$ .

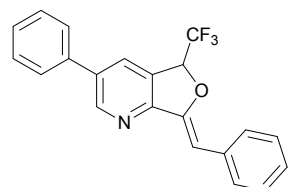

**(7-Benzylidene-3-phenyl-5-(trifluoromethyl)-5,7-dihydro-furo[3,4-b]pyridine**

**(5x):** 5-phenyl-2-(phenylethynyl)nicotinaldehyde (0.07 g, 0.25 mmol),  $\text{TMSCF}_3$  (0.30 mmol), CsF (0.04 g, 0.25 mmol), Reaction time: 2h, yield: 0.07 g, 84%, white solid, mp: 145 °C, IR (KBr):  $\nu$  1671, 1272, 1132, 1058, 854  $\text{cm}^{-1}$ ,  $^1\text{H}$  NMR (500 MHz,  $\text{CDCl}_3$ ):  $\delta$  8.86 (s, 1H), 7.88 (s, 1H), 7.74 (d,  $J = 8.0$  Hz, 1H), 7.54 (d,  $J = 7.5$  Hz, 2H), 7.45 (t,  $J = 7.0$  Hz, 2H), 7.39 (t,  $J = 7.5$  Hz, 1H), 7.32 (t,  $J = 8.0$  Hz, 2H), 7.18 (t,  $J =$

7.5 Hz, 2H), 6.51 (s, 1H), 5.87 (q,  $J = 6.0$  Hz, 1H),  $^{13}\text{C}$  NMR (125 MHz,  $\text{CDCl}_3$ ):  $\delta$  153.15, 151.50, 151.33, 136.92, 136.86, 134.52, 129.43, 129.16, 128.82, 128.64, 127.37, 127.13, 126.99, 123.96, 121.72, 101.34, 79.83 (q,  $J = 35.37$  Hz),  $^{19}\text{F}$  NMR (500 MHz,  $\text{CDCl}_3$ ):  $\delta$  -77.70, HRMS (ESI) exact mass calcd. for  $\text{C}_{21}\text{H}_{14}\text{F}_3\text{NOH}$ : 354.1106 (M+H) $^+$ , found 354.1123 (M+H) $^+$ .

## X-Ray Crystallography of compound **5i**:

X-ray single crystal structural data of compounds **5i** is collected on Agilent Xcalibur, Eos diffractometer equipped with Enhance (Mo) X-ray source and graphite monochromated Mo-K $\alpha$  radiation ( $\lambda = 0.71073$  Å). The program CrysAlis PRO (Agilent, 2012) was used for integration of diffraction profiles and absorption correction was made with SCALE3 ABSPACK scaling algorithm.<sup>2</sup> Structures is solved by SIR 92<sup>3</sup> and refined by full matrix least square method using SHELXL-2014/7<sup>4</sup> and WinGX version 2014.1.<sup>5</sup> All the non-hydrogen atoms were located from the difference Fourier map and refined anisotropically. The crystallographic and structure refinement data of **5i** is summarized in Table 1. Selected bond lengths and angles are given in Table 2.

Image of **5i** in mercury

CCDC is **1516018**, Ellipsoid probability = 30%

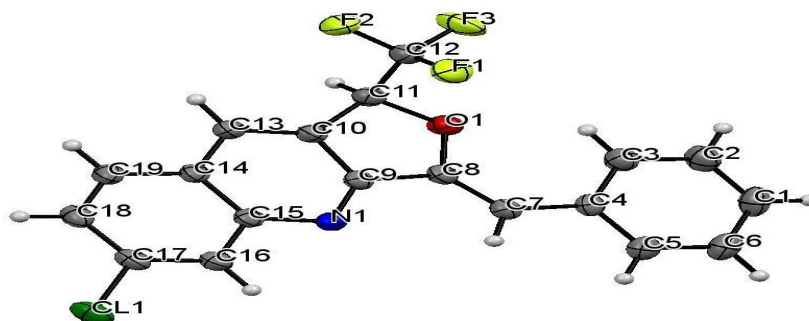

Oak Ridge Thermal-Ellipsoid Plot (ORTEP) of **5i**  
Ellipsoid probability = 30%, Bond line width = 2

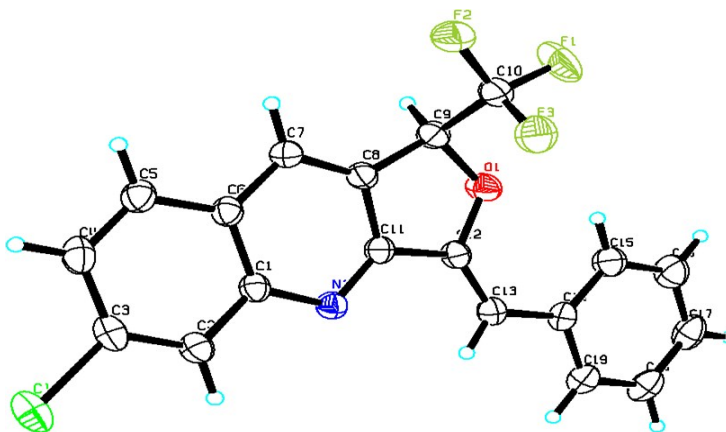

**Table 1.** Crystal data and structure refinement of **5i**.

| Parameters        | Molecule <b>5i</b>                                |
|-------------------|---------------------------------------------------|
| CCDC No.          | 1516018                                           |
| Empirical formula | C <sub>19</sub> H <sub>11</sub> F <sub>3</sub> NO |
| Formula Weight    | 361.74                                            |
| Crystal system    | monoclinic                                        |

|                                      |                    |
|--------------------------------------|--------------------|
| Space group                          | C2/c               |
| a (Å)                                | 17.5265(8)         |
| b (Å)                                | 18.9585(9)         |
| c (Å)                                | 11.1154(5)         |
| $\alpha$ (°)                         | 90                 |
| $\beta$ (°)                          | 120.995(2)         |
| $\gamma$ (°)                         | 90                 |
| V (Å <sup>3</sup> )                  | 3166.0(3)          |
| Z                                    | 8                  |
| D <sub>c</sub> (g cm <sup>-3</sup> ) | 1.518              |
| $\mu$ (mm <sup>-1</sup> )            | 0.280              |
| F (000)                              | 1472               |
| T (K)                                | 298                |
| $\lambda$ (Mo K $\alpha$ )(Å)        | 0.71073            |
| Crystal size (mm)                    | 0.13 x 0.22 x 0.32 |
| $\Theta_{\min}$ (°)                  | 2.7                |
| $\Theta_{\max}$ (°)                  | 28.3               |
| Total data                           | 51891              |
| Unique data                          | 3960               |
| R <sub>int</sub>                     | 0.037              |
| Data [ $I > 2\sigma(I)$ ]            | 3027               |
| R <sup>a</sup>                       | 0.0439             |
| R <sub>w</sub> <sup>b</sup>          | 0.1244             |
| S                                    | 1.03               |

**Table 2.** Selected bond distance (Å) and angles (°) in **5i**.

|        |            |          |          |
|--------|------------|----------|----------|
| C11-C3 | 1.7365(18) | C12-C13  | 1.329(3) |
| F1-C10 | 1.324(2)   | C13-C14  | 1.457(3) |
| F2-C10 | 1.329(2)   | C14 -C15 | 1.399(3) |
| F3-C10 | 1.323(3)   | C14 -C19 | 1.390(3) |
| O1-C9  | 1.435(2)   | C15-C16  | 1.378(3) |
| O1-C19 | 1.308(5)   | C13-C14  | 1.497(3) |
| O -C12 | 1.390(2)   | C16-C17  | 1.377(4) |
| N1 -C1 | 1.367(2)   | C17-C18  | 1.377(3) |
| N1-C11 | 1.316(2)   | C18-C19  | 1.380(3) |
| C1-C2  | 1.412(2)   | C2 -H2   | 0.9300   |
| C1-C6  | 1.425(2)   | C4-H4    | 0.9300   |
| C2-C3  | 1.360(3)   | C5-H5    | 0.9300   |
| C3-C4  | 1.407(3)   | C7 -H7   | 0.9300   |
| C4-C5  | 1.357(3)   | C9-H9    | 0.9800   |
| C5-C6  | 1.413(3)   | C13-H13  | 0.92(2)  |
| C6 -C7 | 1.412(2)   | C15-H15  | 0.9300   |
| C7-C8  | 1.356(2)   | C16-H16  | 0.9300   |
| C8-C9  | 1.495(2)   | C17-H17  | 0.9300   |
| C8-C11 | 1.407(2)   | C18-H18  | 0.9300   |



|            |            |               |            |
|------------|------------|---------------|------------|
| C9 -C10    | 1.508(3)   | C19 -H19      | 0.9300     |
| C11 -C12   | 1.459(2)   |               |            |
| C9 -O1-C12 | 110.44(12) | N1 -C11-C12   | 125.97(14) |
| C1-N1-C11  | 115.27(14) | C8 -C11 -C12  | 108.47(13) |
| N1-C1-C2   | 118.11(15) | O1-C12 -C11   | 107.89(13) |
| N1-C1 -C6  | 123.12(14) | O1-C12-C13    | 123.63(15) |
| C2 -C1-C6  | 118.77(15) | C11-C12-C13   | 128.48(15) |
| C1-C2-C3   | 119.95(16) | C12 -C13 -C14 | 130.17(17) |
| C1-C3-C2   | 119.62(15) | C13-C14-C15   | 123.52(17) |
| C1 -C3-C4  | 118.28(14) | C13 -C14-C19  | 118.80(16) |
| C2 -C3-C4  | 122.10(17) | C15-C14-C19   | 117.66(17) |
| C3-C4-C5   | 118.71(17) | C14-C15-C16   | 120.37(19) |
| C4-C5-C6   | 121.77(17) | C15-C16-C17   | 121.1(2)   |
| C1-C6-C5   | 118.65(15) | C16-C17-C18   | 119.2(2)   |
| C1-C6-C7   | 118.67(15) | C17-C18-C19   | 120.1(2)   |
| C5-C6-C7   | 122.68(16) | C14-C19-C18   | 121.52(18) |
| C6 -C7-C8  | 117.37(16) | C1-C2-H2      | 120.00     |
| C7-C8 -C9  | 132.56(16) | C3-C2-H2      | 120.00     |
| C7-C8-C11  | 119.90(15) | C3-C4-H4      | 121.00     |
| C9-C8-C11  | 107.52(14) | C5 -C4-H4     | 121.00     |
| O1-C9-C8   | 105.47(13) | C4-C5-H5      | 119.00     |
| O1-C9-C10  | 107.27(15) | C6-C5-H5      | 119.00     |
| C8-C9-C10  | 113.68(18) | C6-C7-H7      | 121.00     |
| F1-C10-F2  | 106.83(16) | C8-C7-H7      | 121.00     |
| F1-C10-F3  | 107.56(18) | O1-C9-H9      | 110.00     |
| F1-C10-C9  | 111.8(2)   | C8-C9-H9      | 110.00     |
| F2-C10-F3  | 106.6(2)   | C10-C9-H9     | 110.00     |
| F2-C10-C9  | 111.41(17) | C12-C13-H13   | 113.4(12)  |
| F3-C10-C9  | 112.37(15) | C14-C13-H13   | 116.4(12)  |
| N1-C11-C8  | 125.55(14) | C14-C14-H15   | 120.00     |

## References

1. a) R. M Singh, A. Chandra, B. Singh, S. Upadhyay, *Tetrahedron* 2008, **64**, 11680; b) A. K. Verma, T. Aggarwal, V. Rustagia and R. C. Larock, *Chem. Commun.*, 2010, **46**, 4064; c) P. Belmont and T. Belhadj, *Org. Lett.*, 2005, **7**, 1793; d) A. B. G. Mariaulea, S. D.-Fincka, P. Helisseya, S. G.-Renaulta, V. Michelet, P. Belmont *Synthesis*, **47**, 2015, A.
2. Agilent, (2012) *CrysAlis PRO* Agilent Technologies, Yarnton, England.
3. a) A. Altomare, G. Cascarano, C. Giacovazzo, and A. Gualaradi, *J. Appl. Cryst.* 1993, **26**, 343; b) A. Altomare, M. C. Burla, G. Camalli, G. Cascarano, C. Giacovazzo, A. Gualardi and G. Polidori, *J. Appl. Cryst.* 1994, **27**, 435.
4. G. M. Sheldrick, *Acta Cryst.*, 2008, **A64**, 112-122.
5. L. J. Farrugia, WinGX-A Windows Program for Crystal Structure Analysis, *J. Appl. Cryst.*, 2012, **45**, 849-854.

<sup>1</sup>H NMR (500 MHz), <sup>13</sup>C NMR (125 MHz) and <sup>19</sup>F NMR (500 MHz) spectra of starting materials

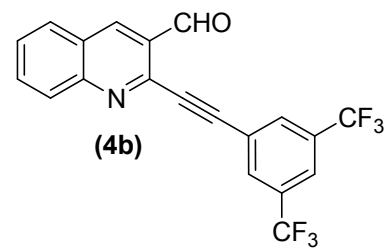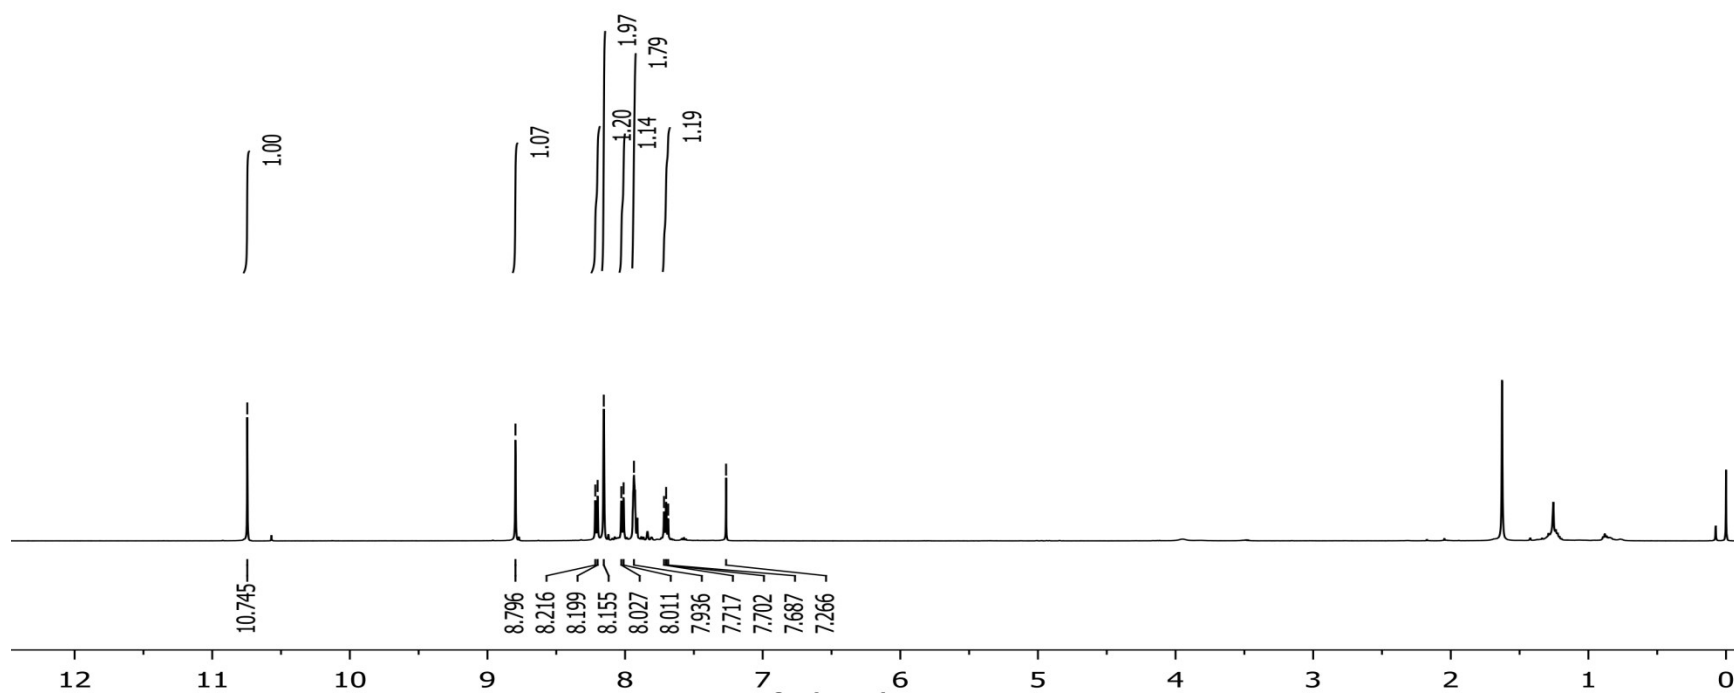

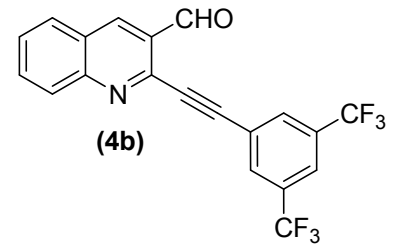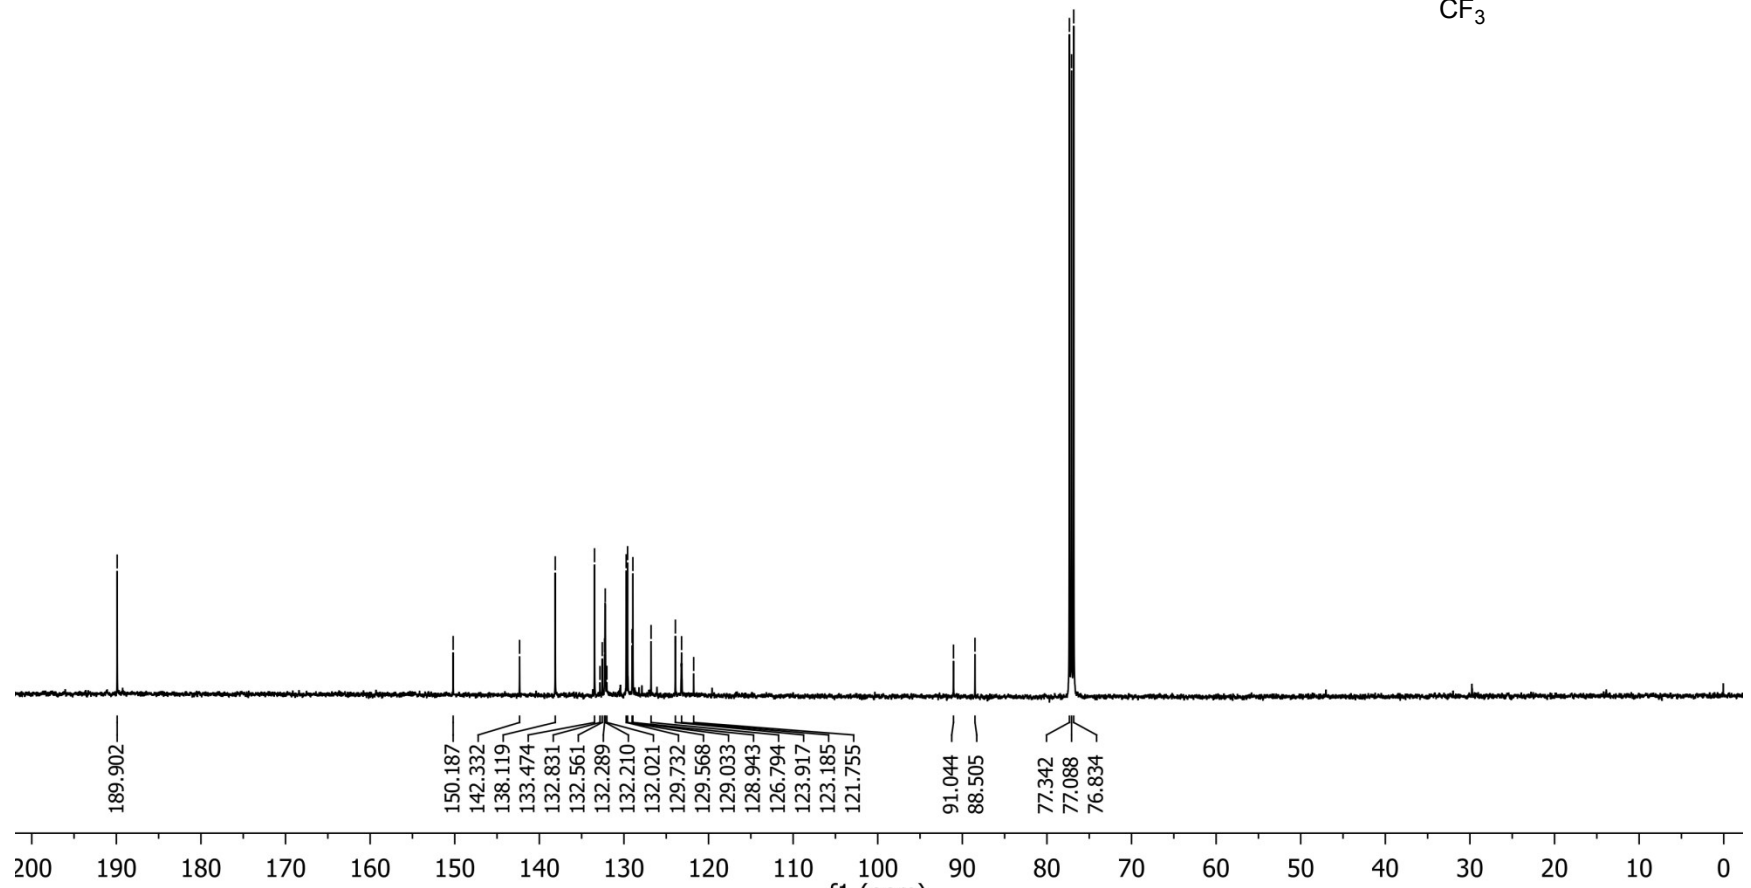

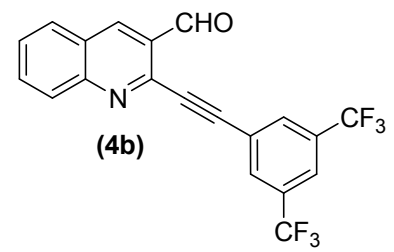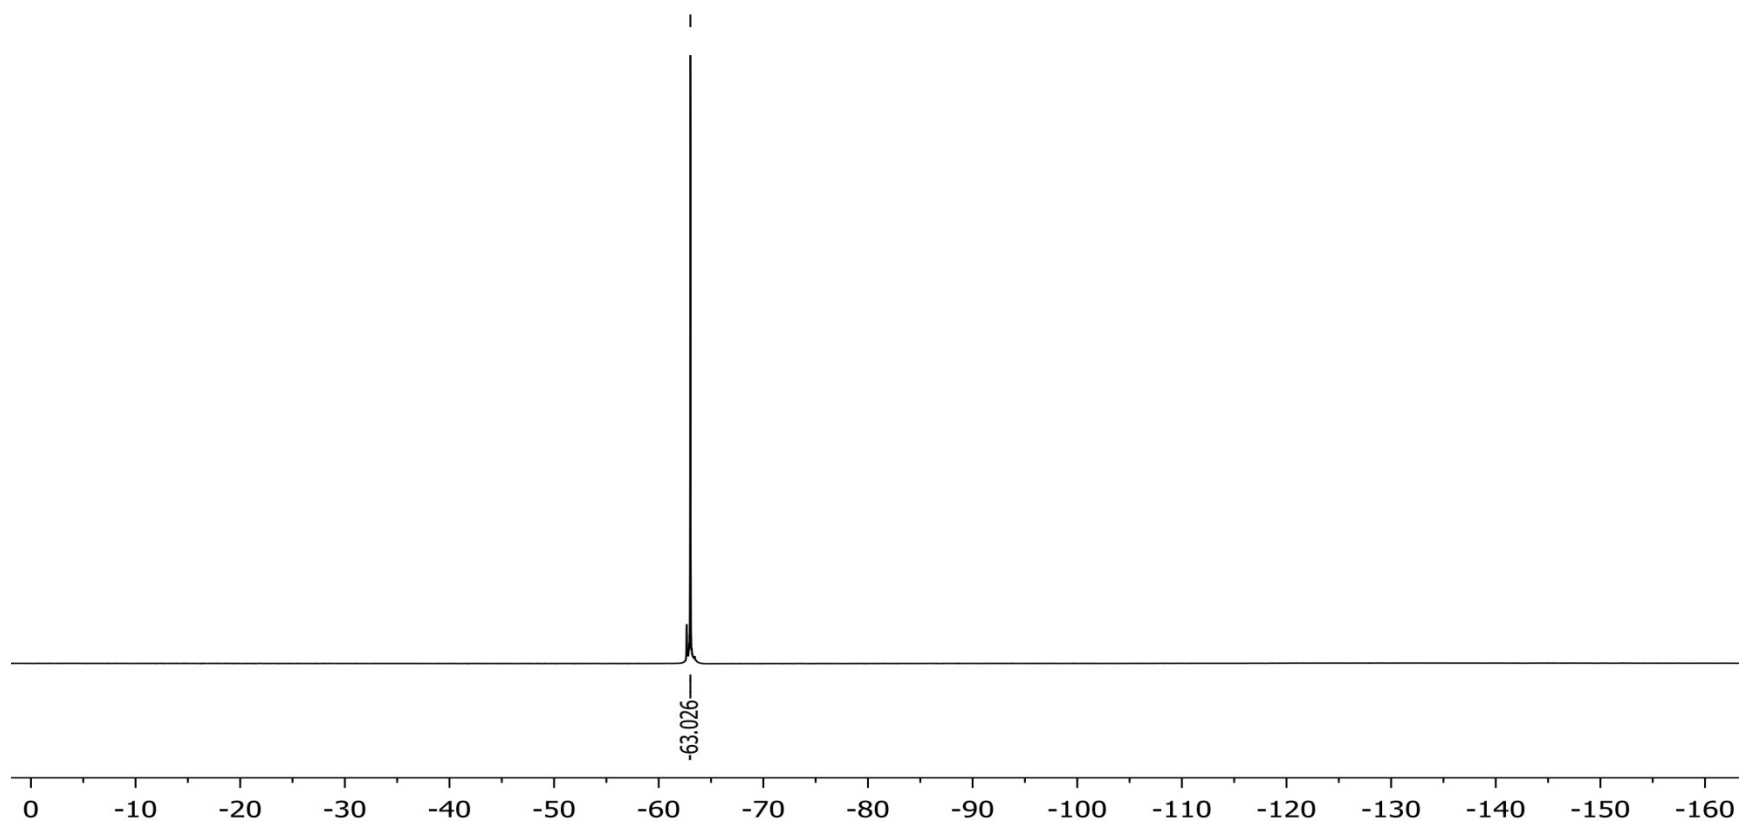

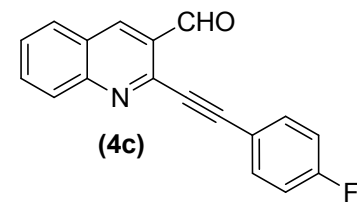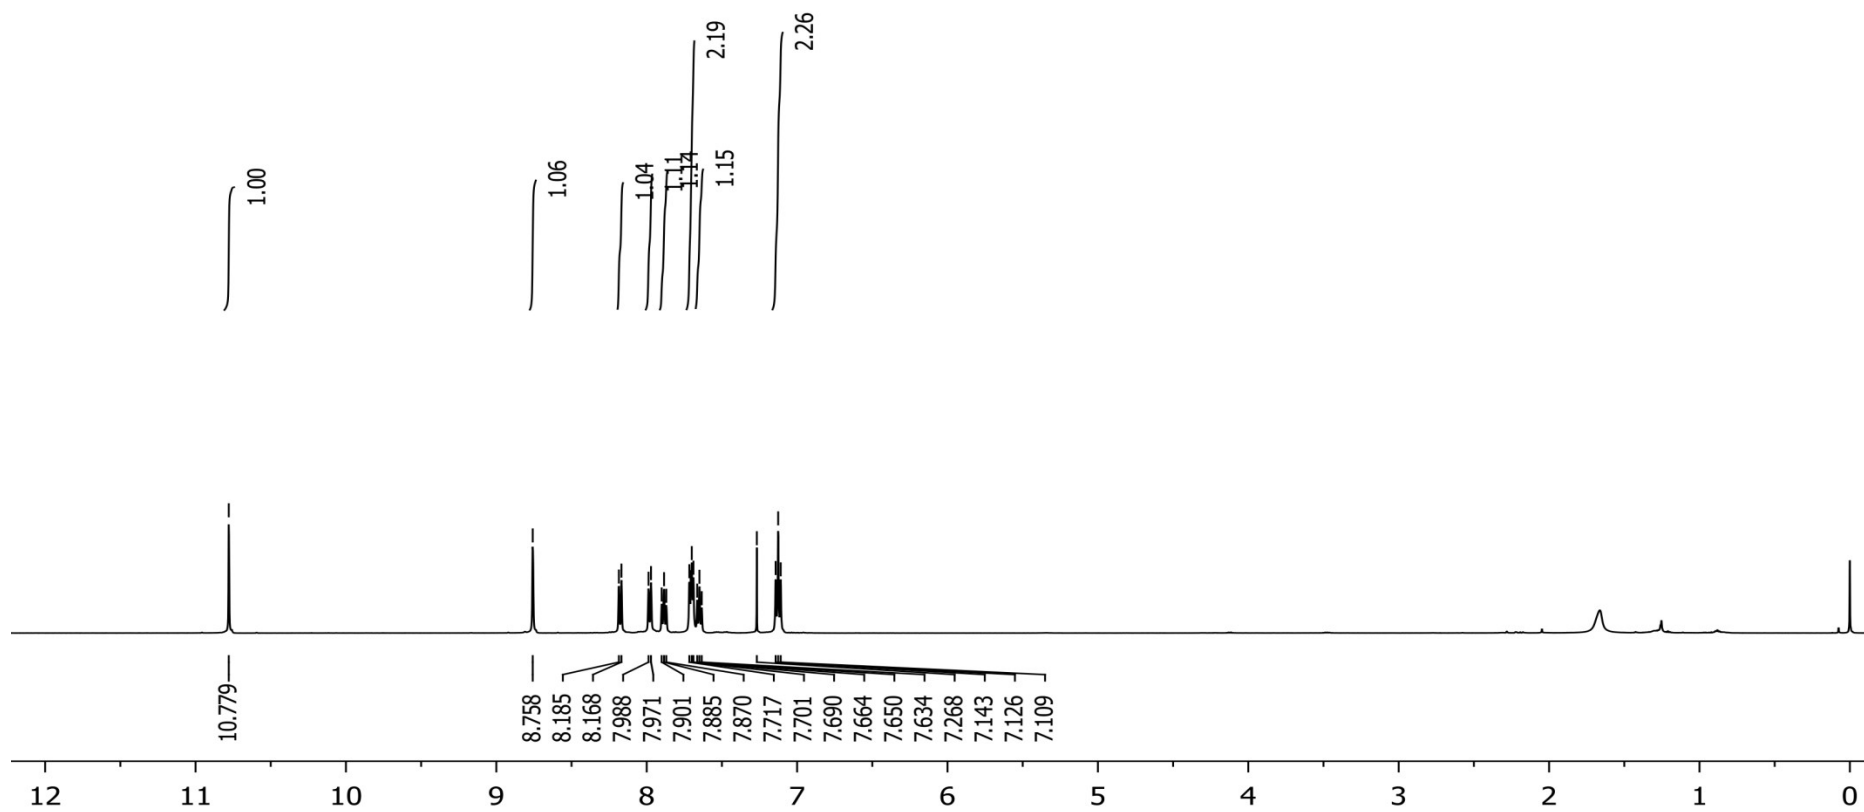

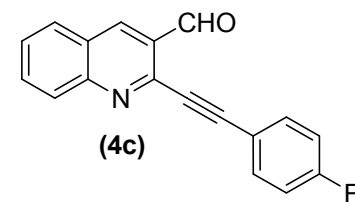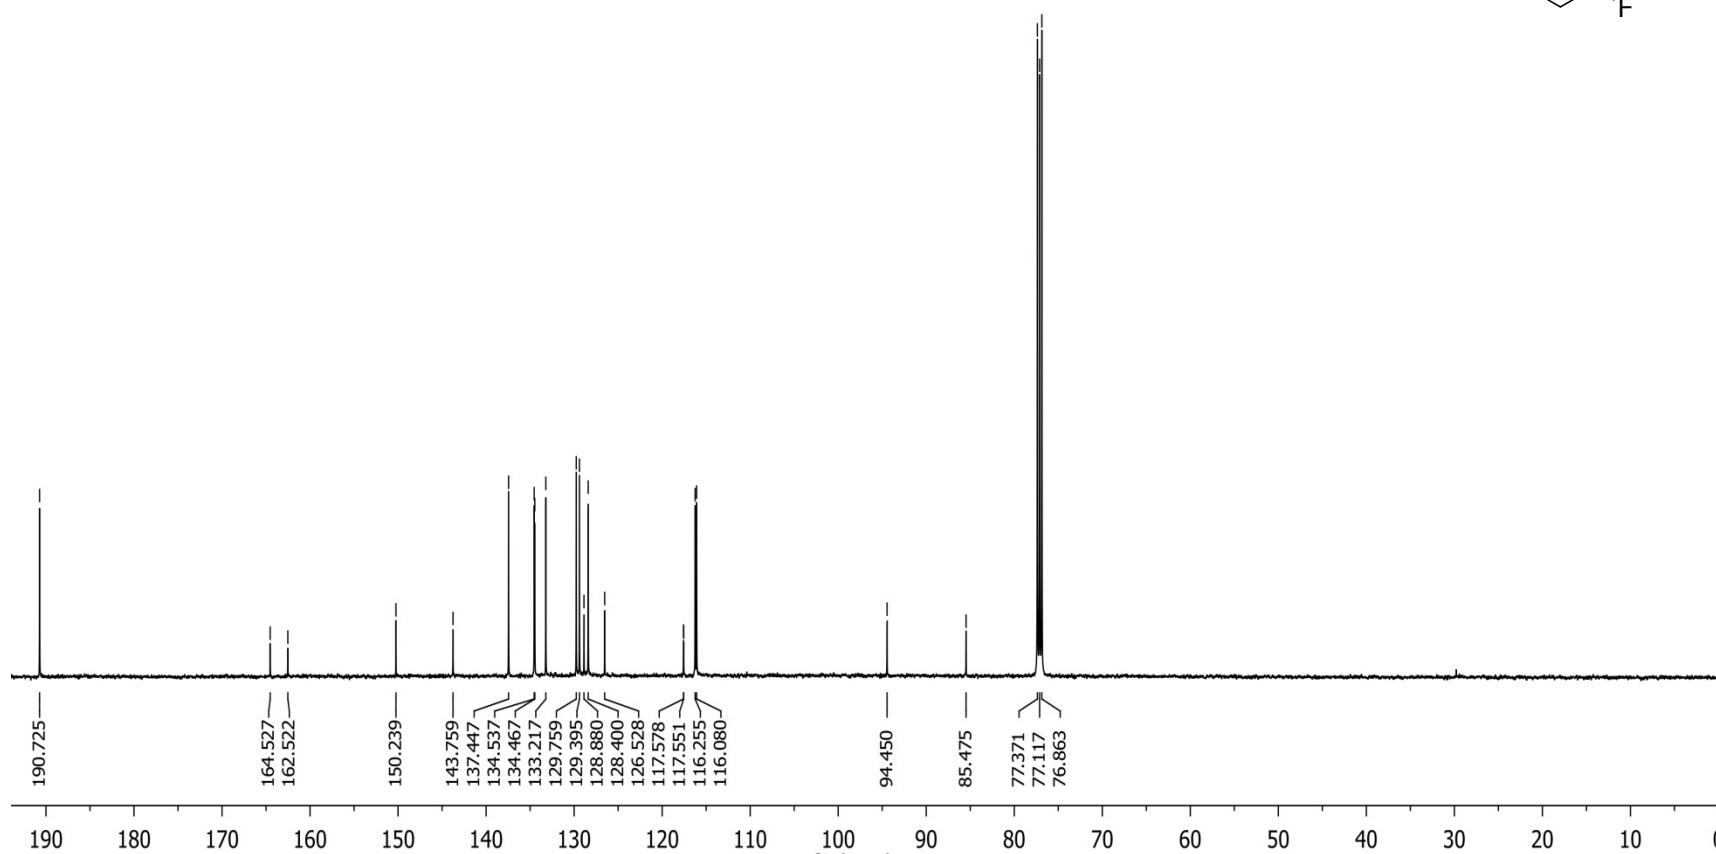

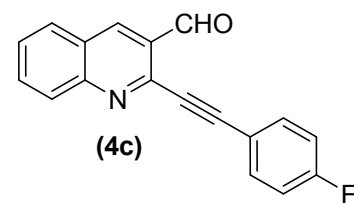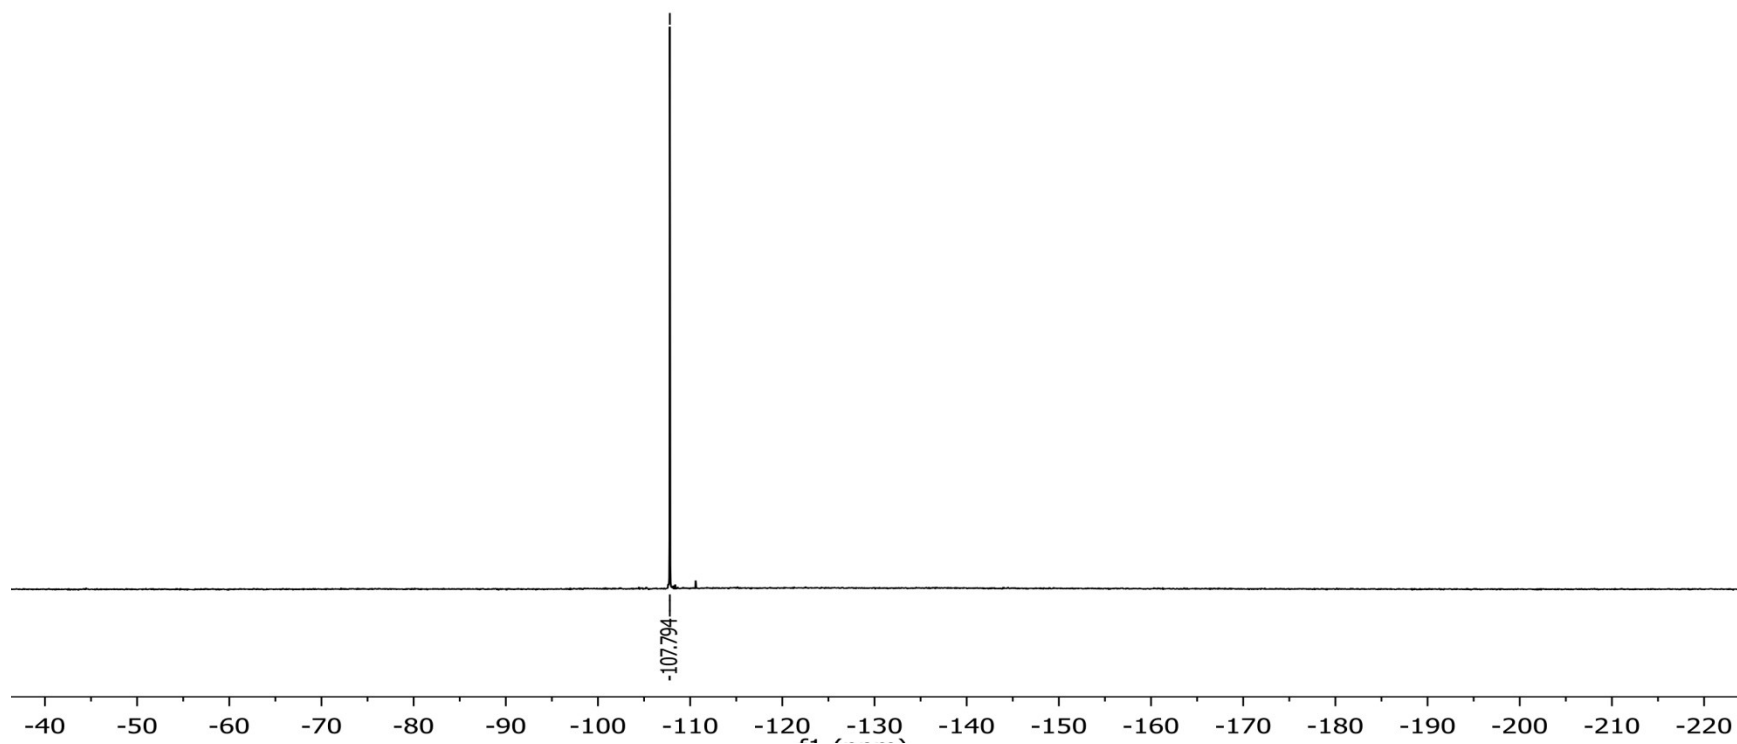

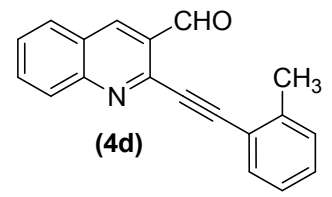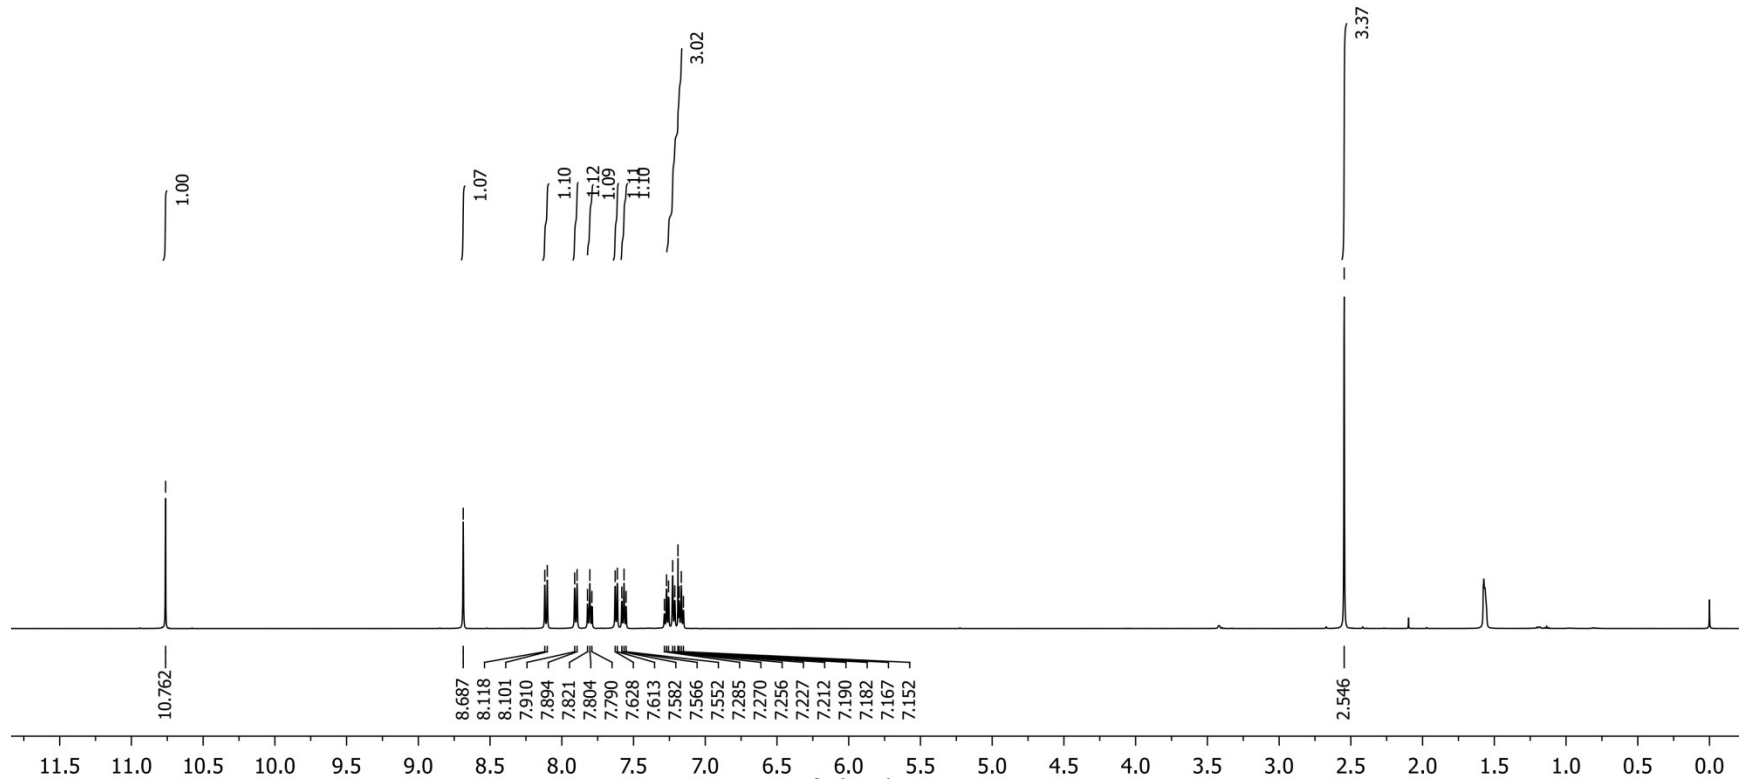



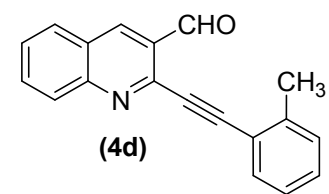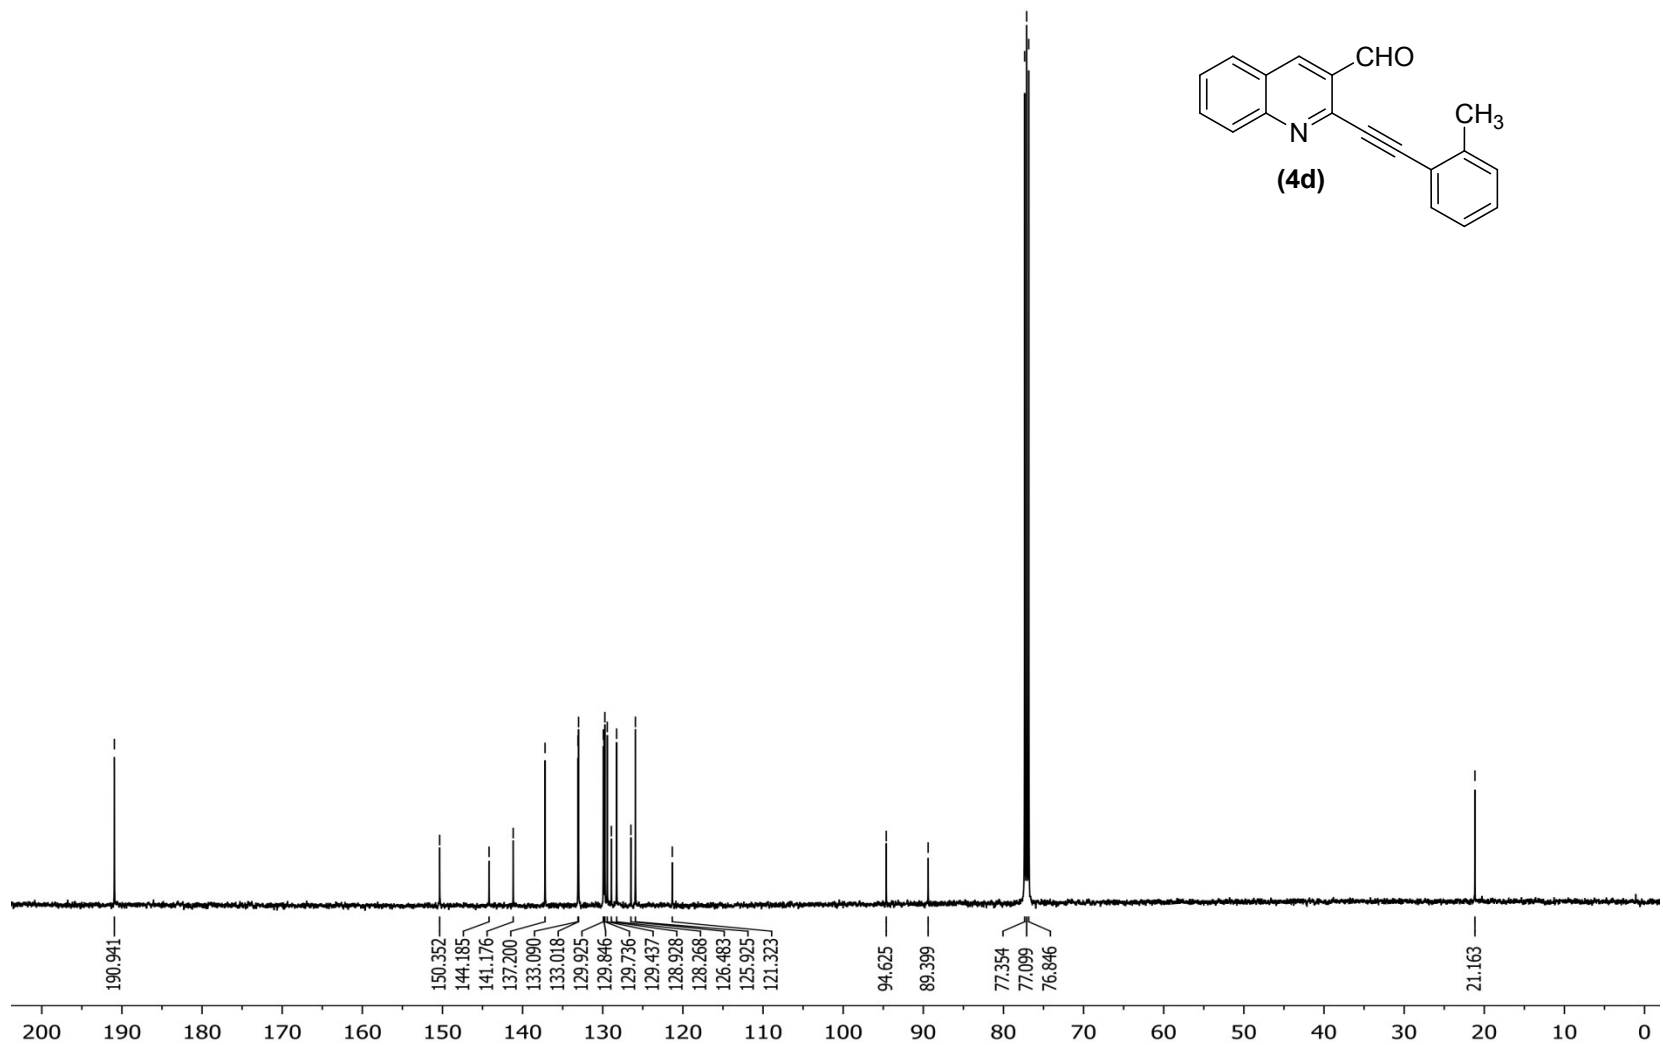

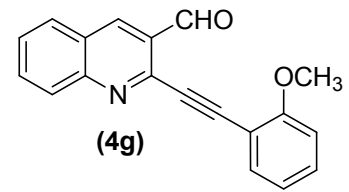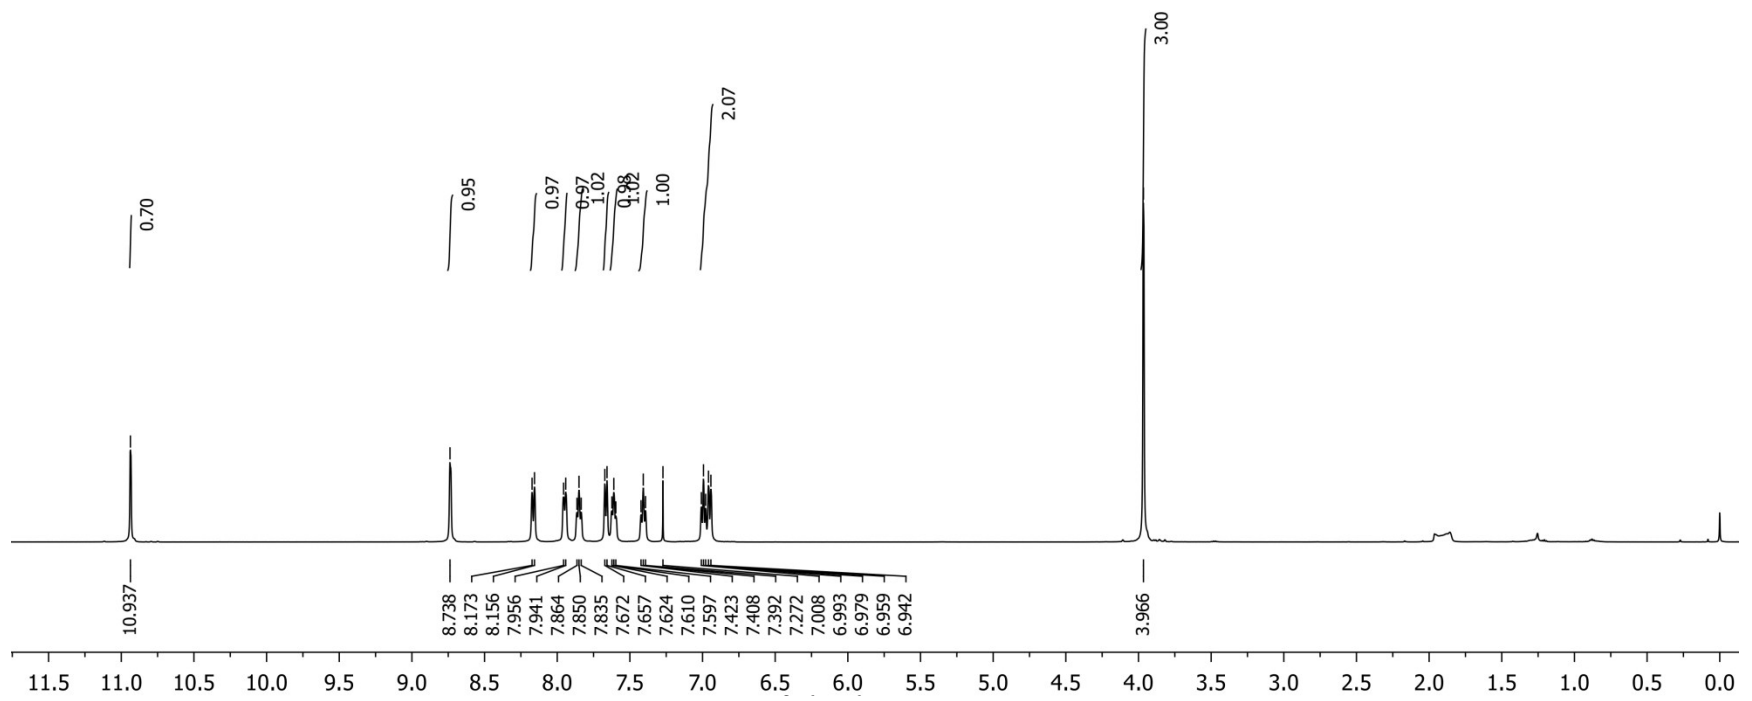

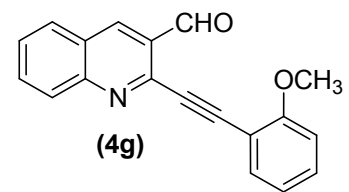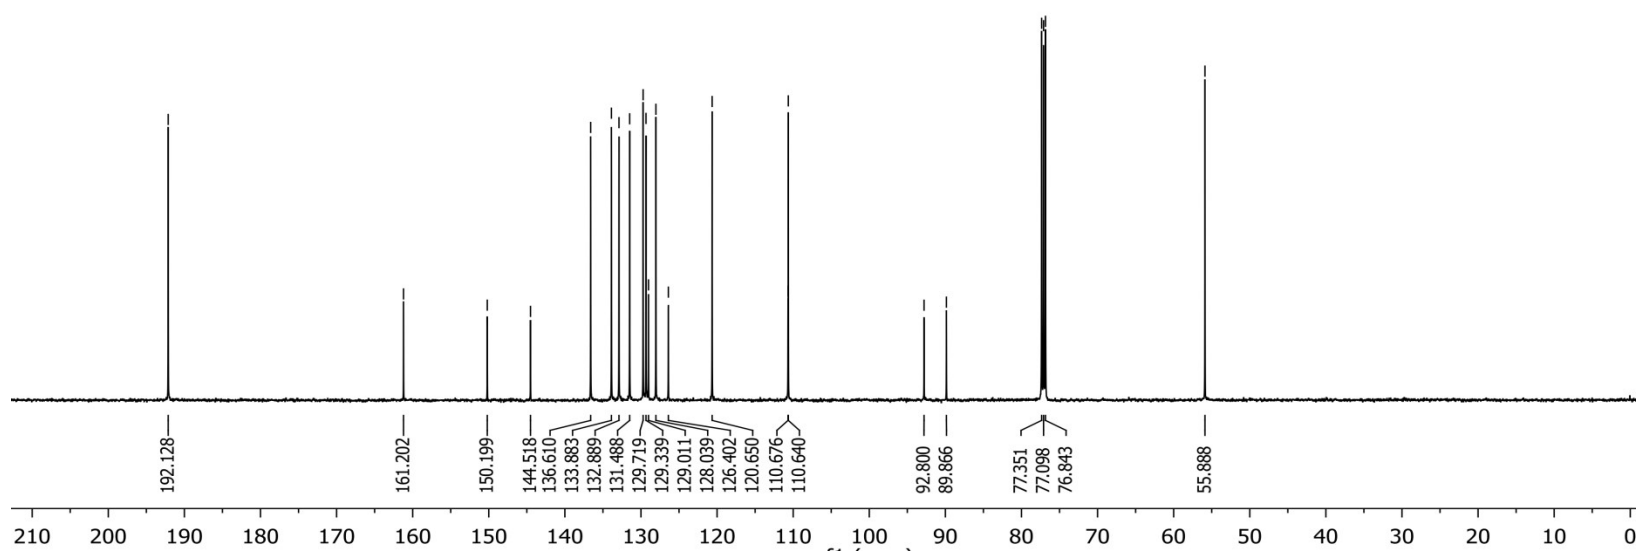

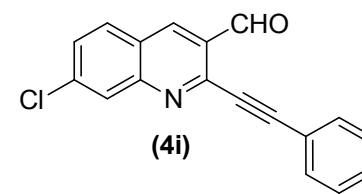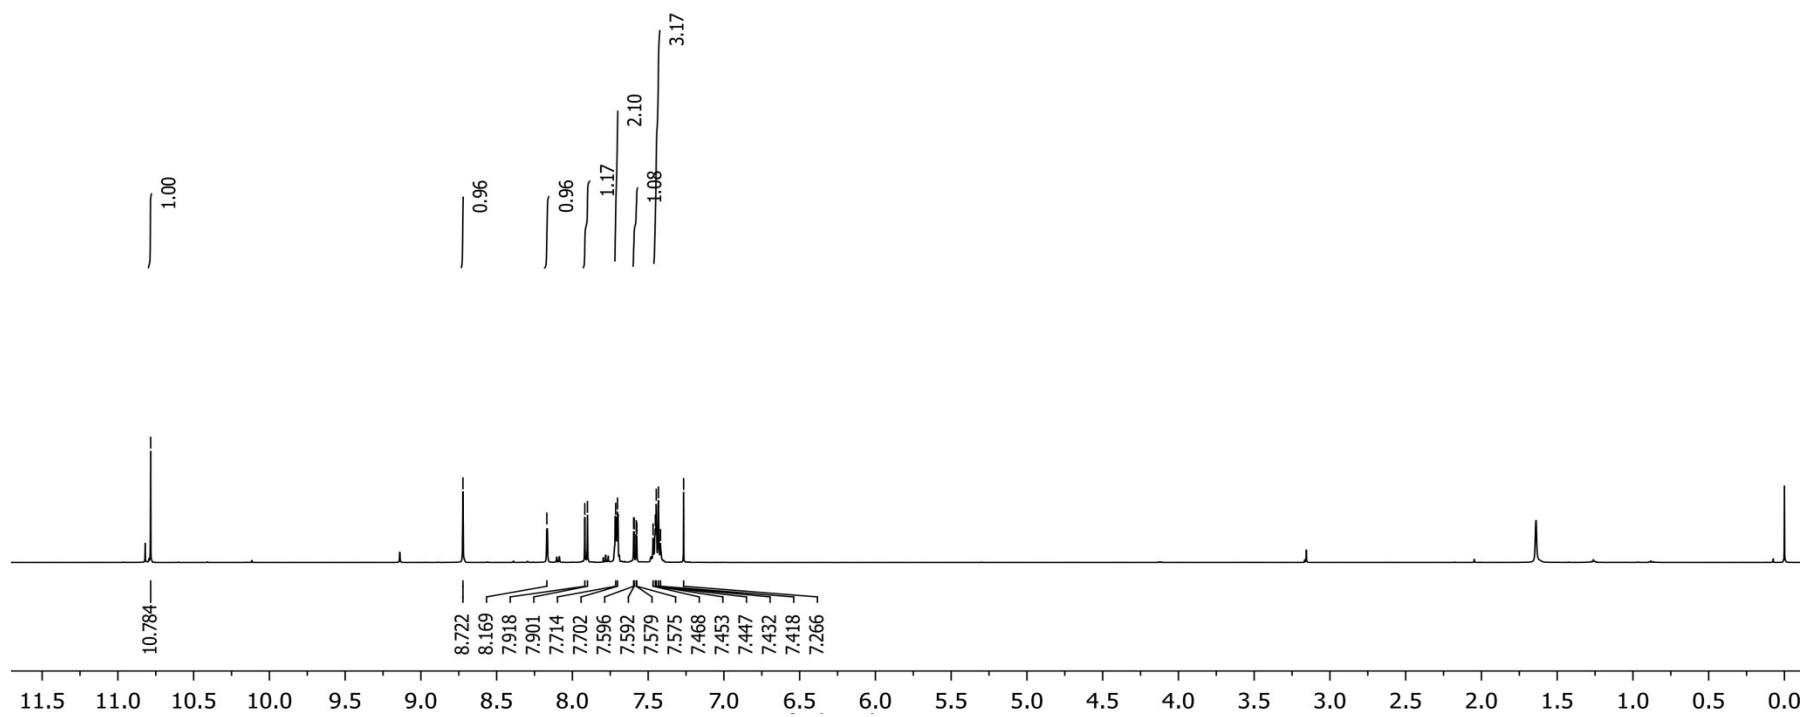

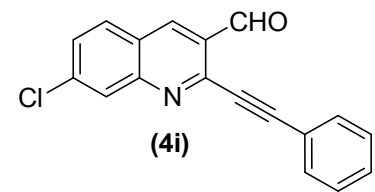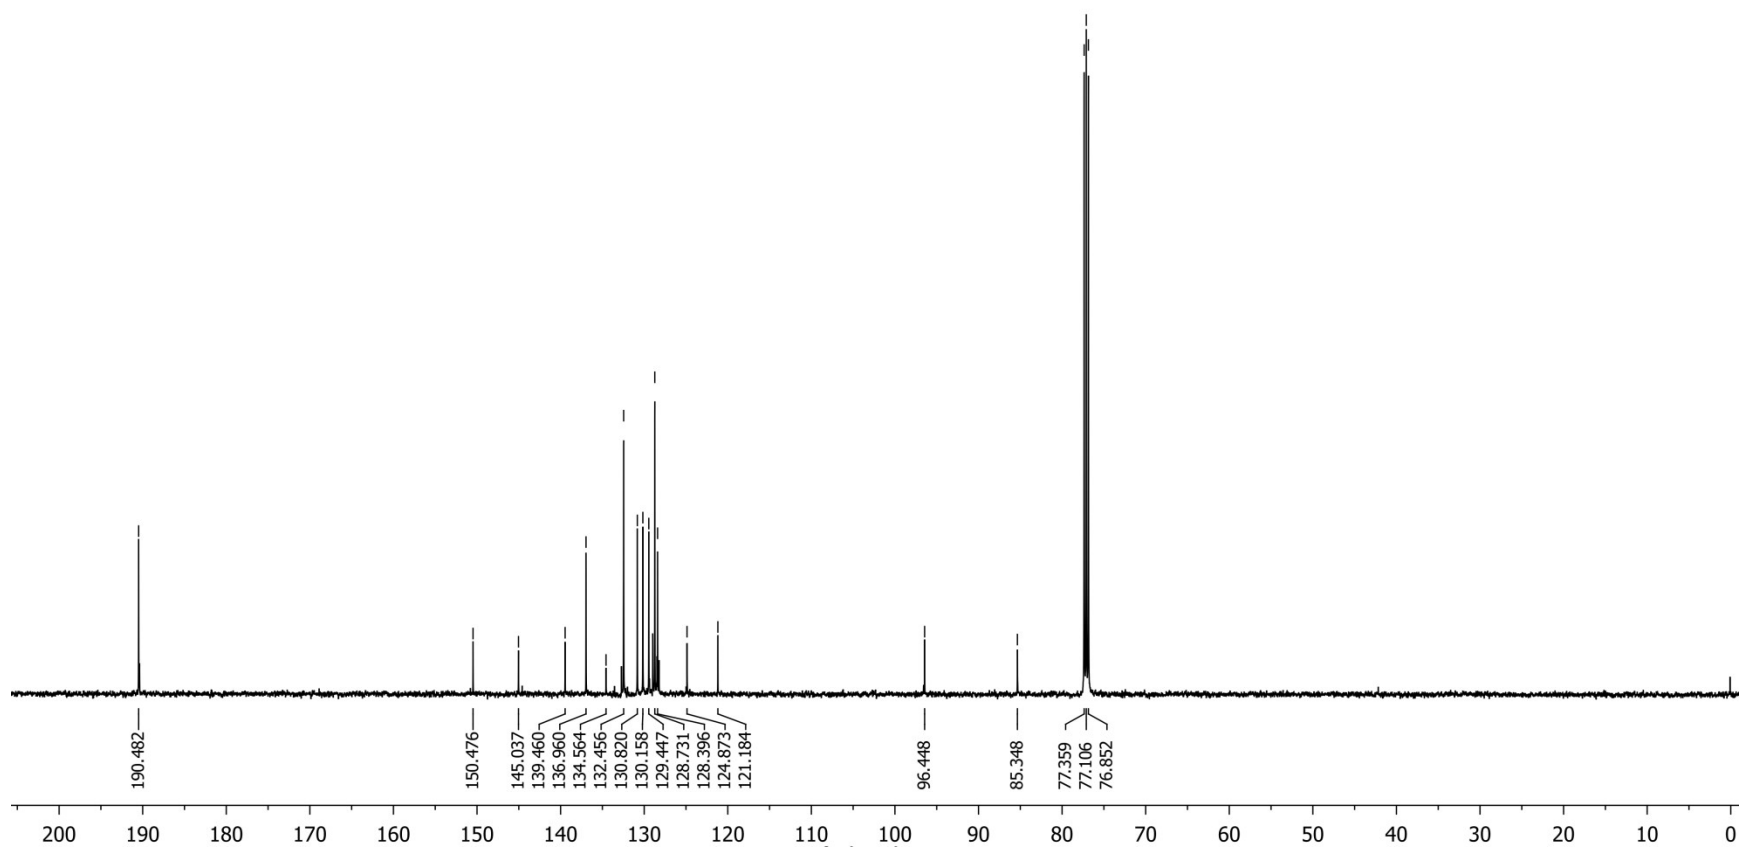

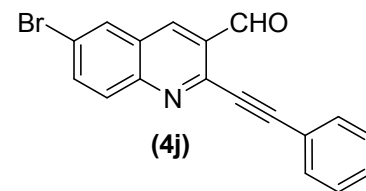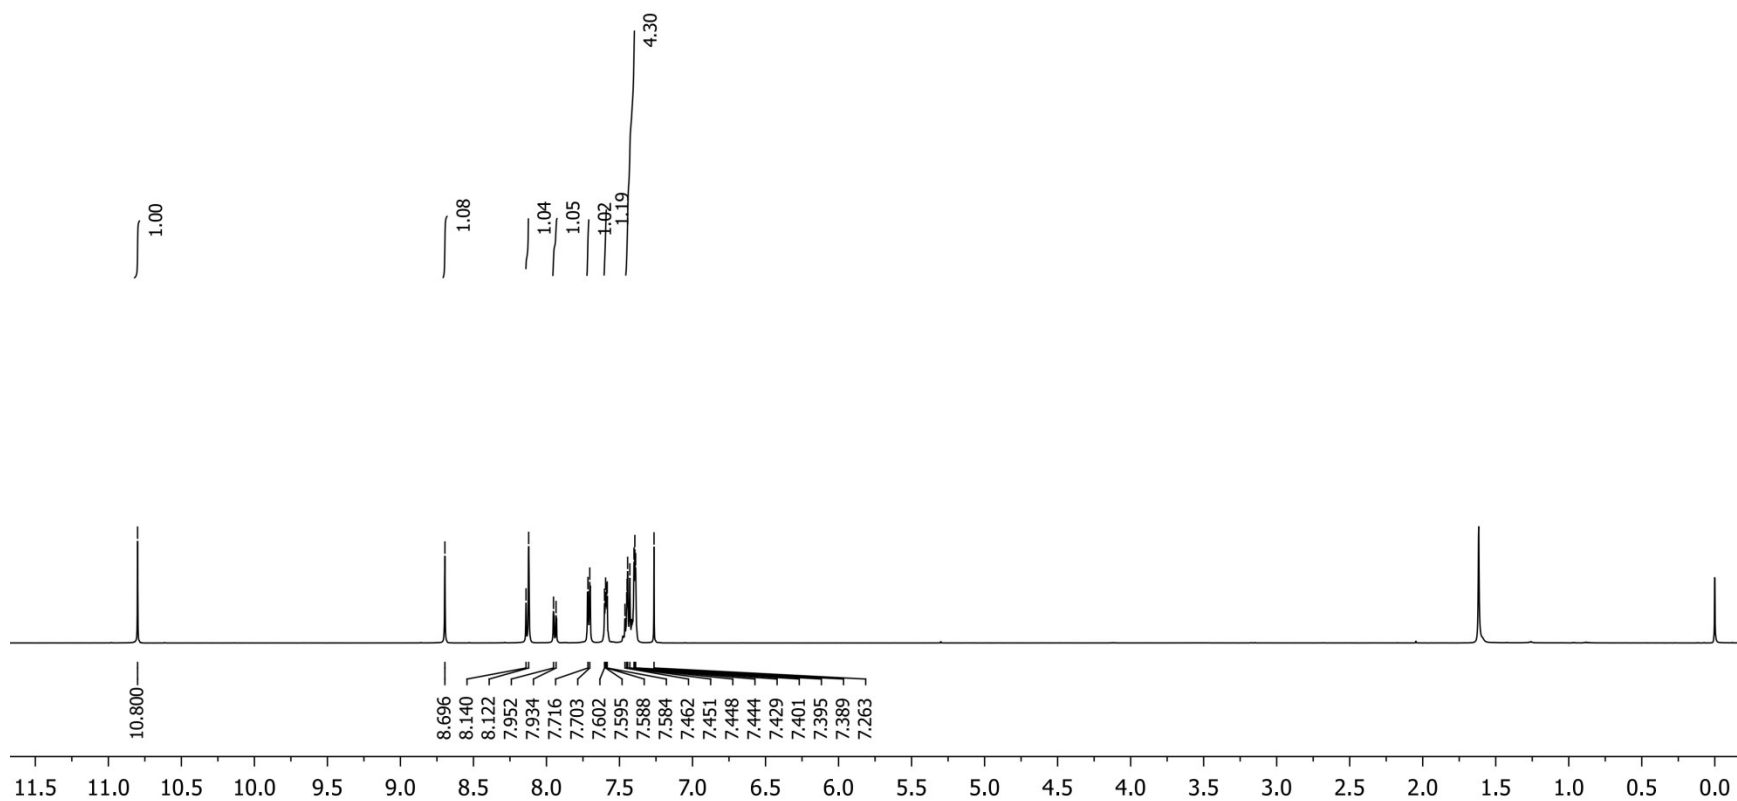

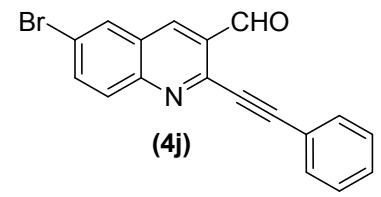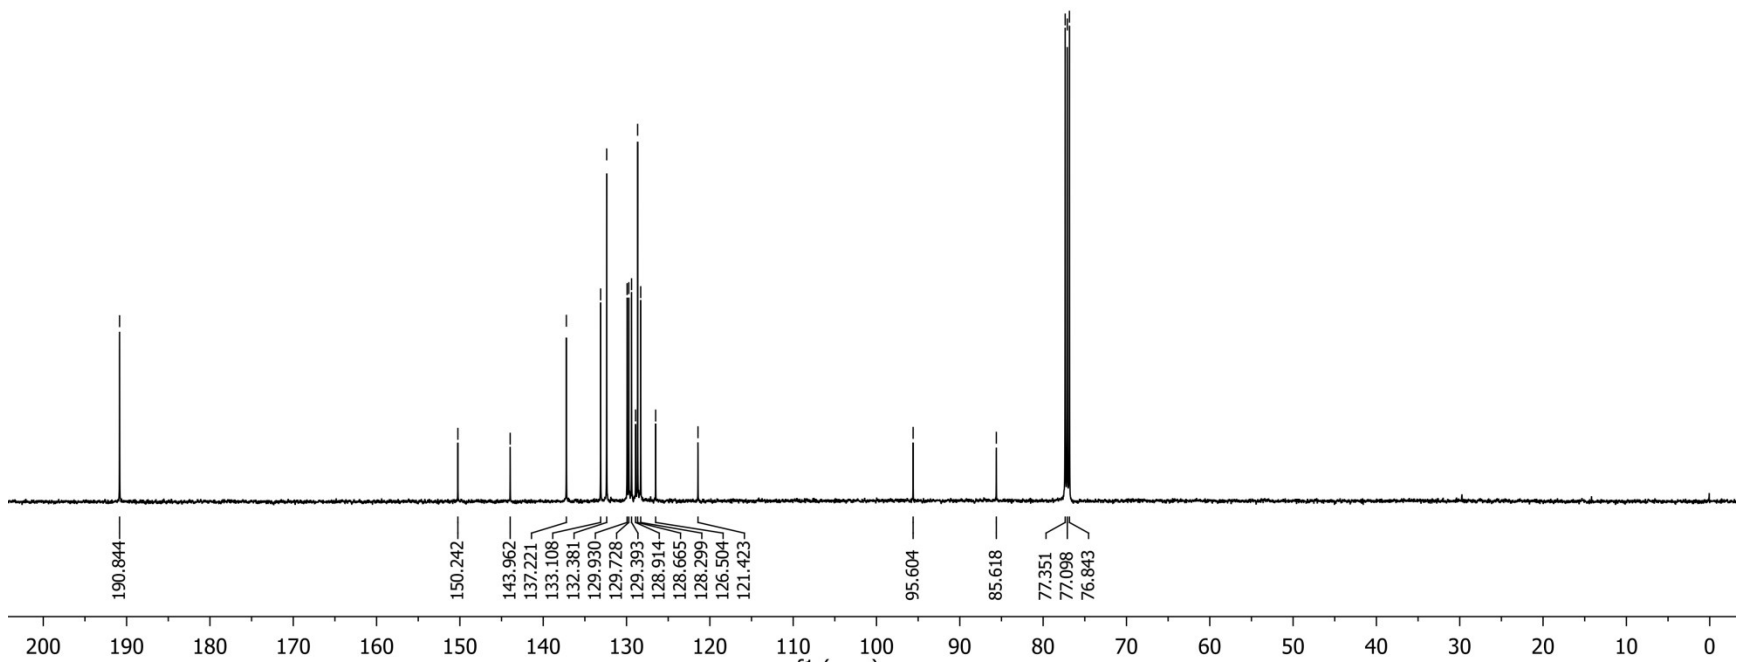

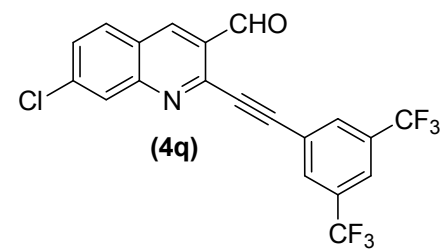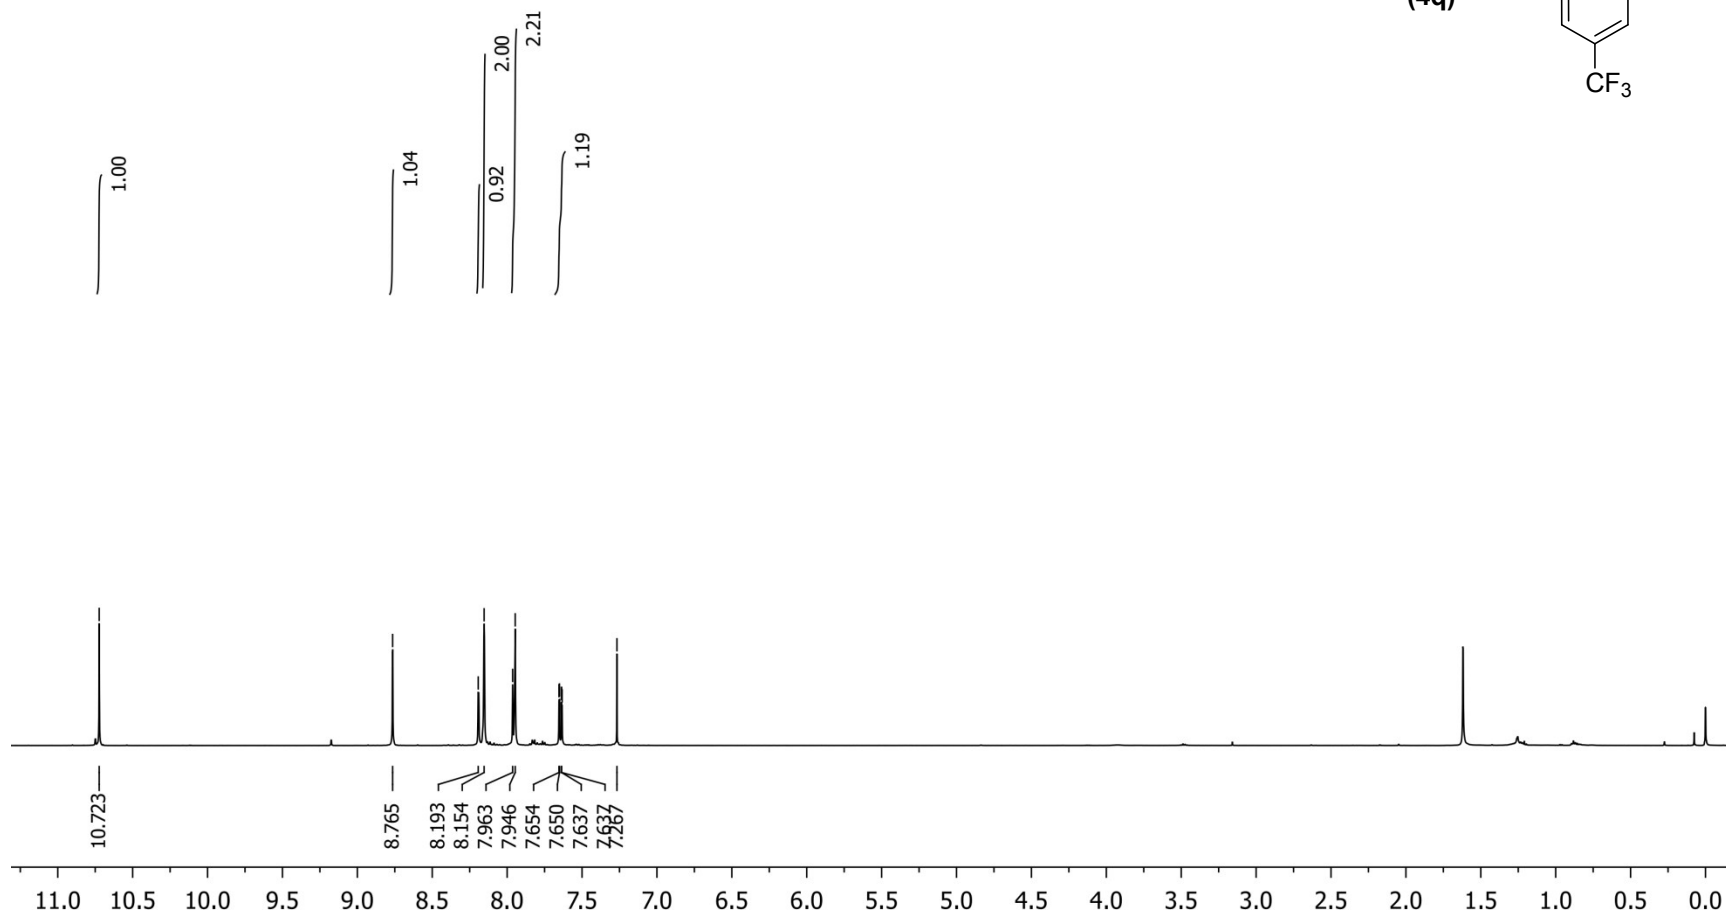



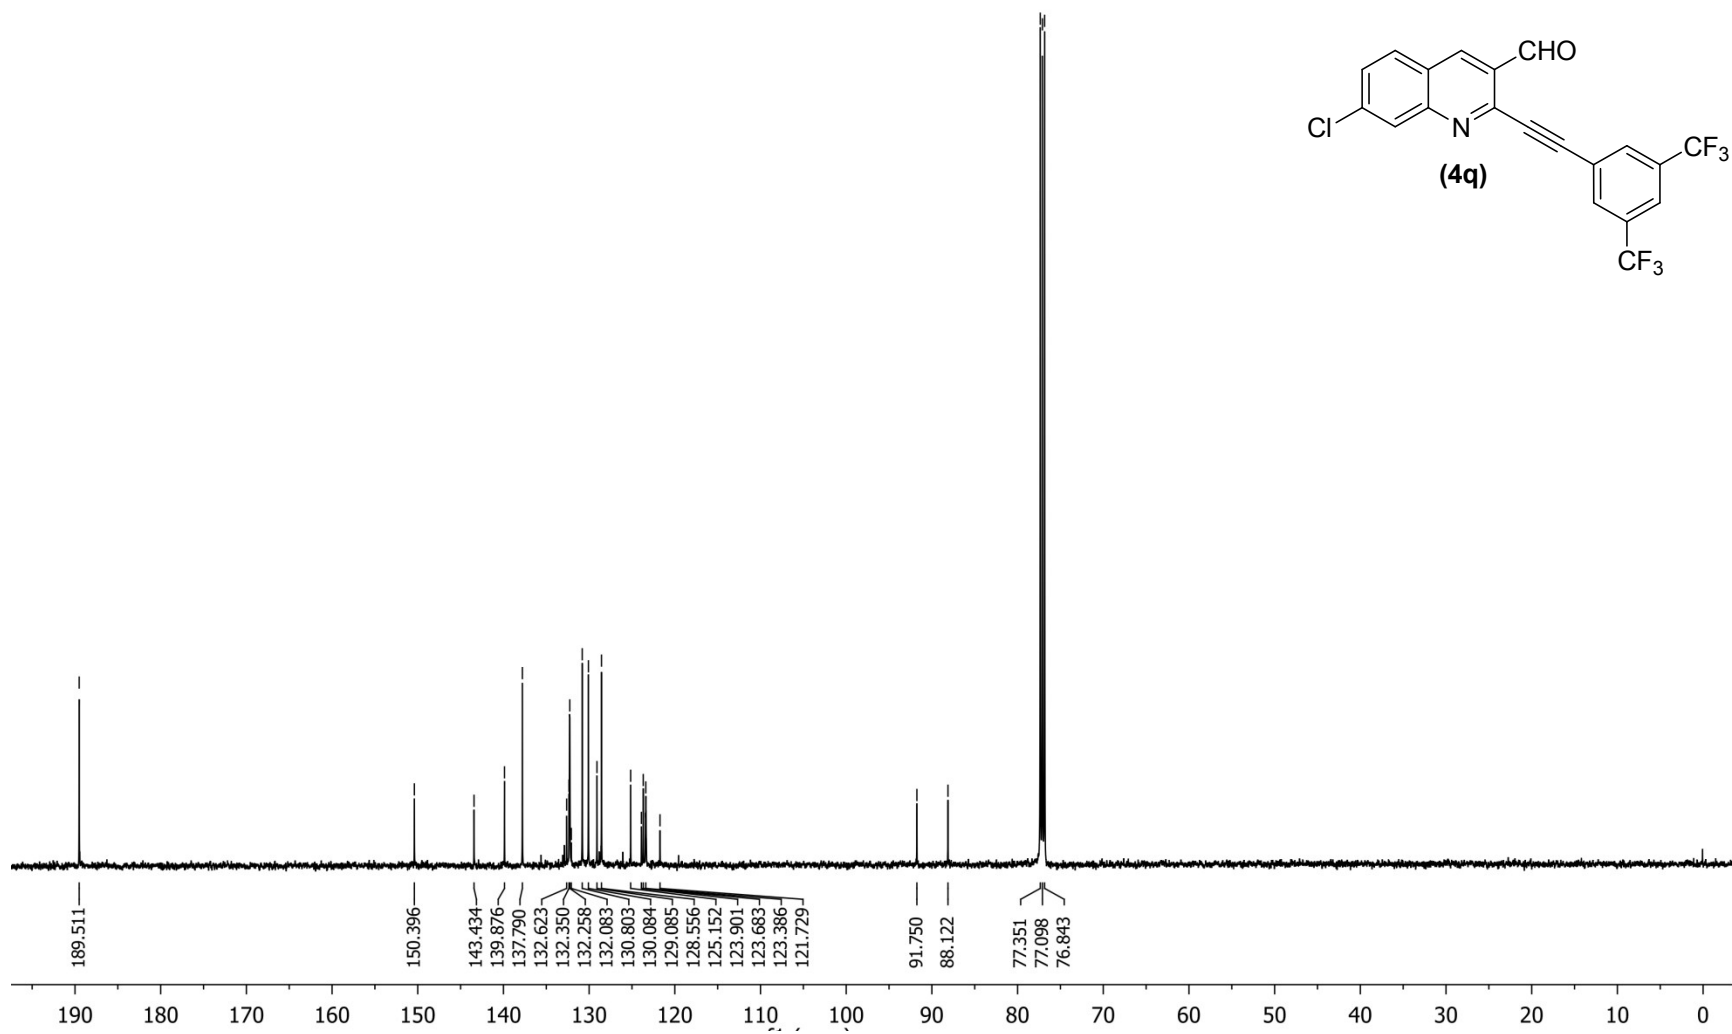

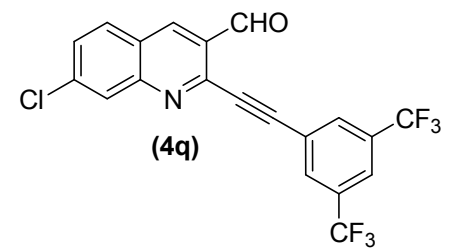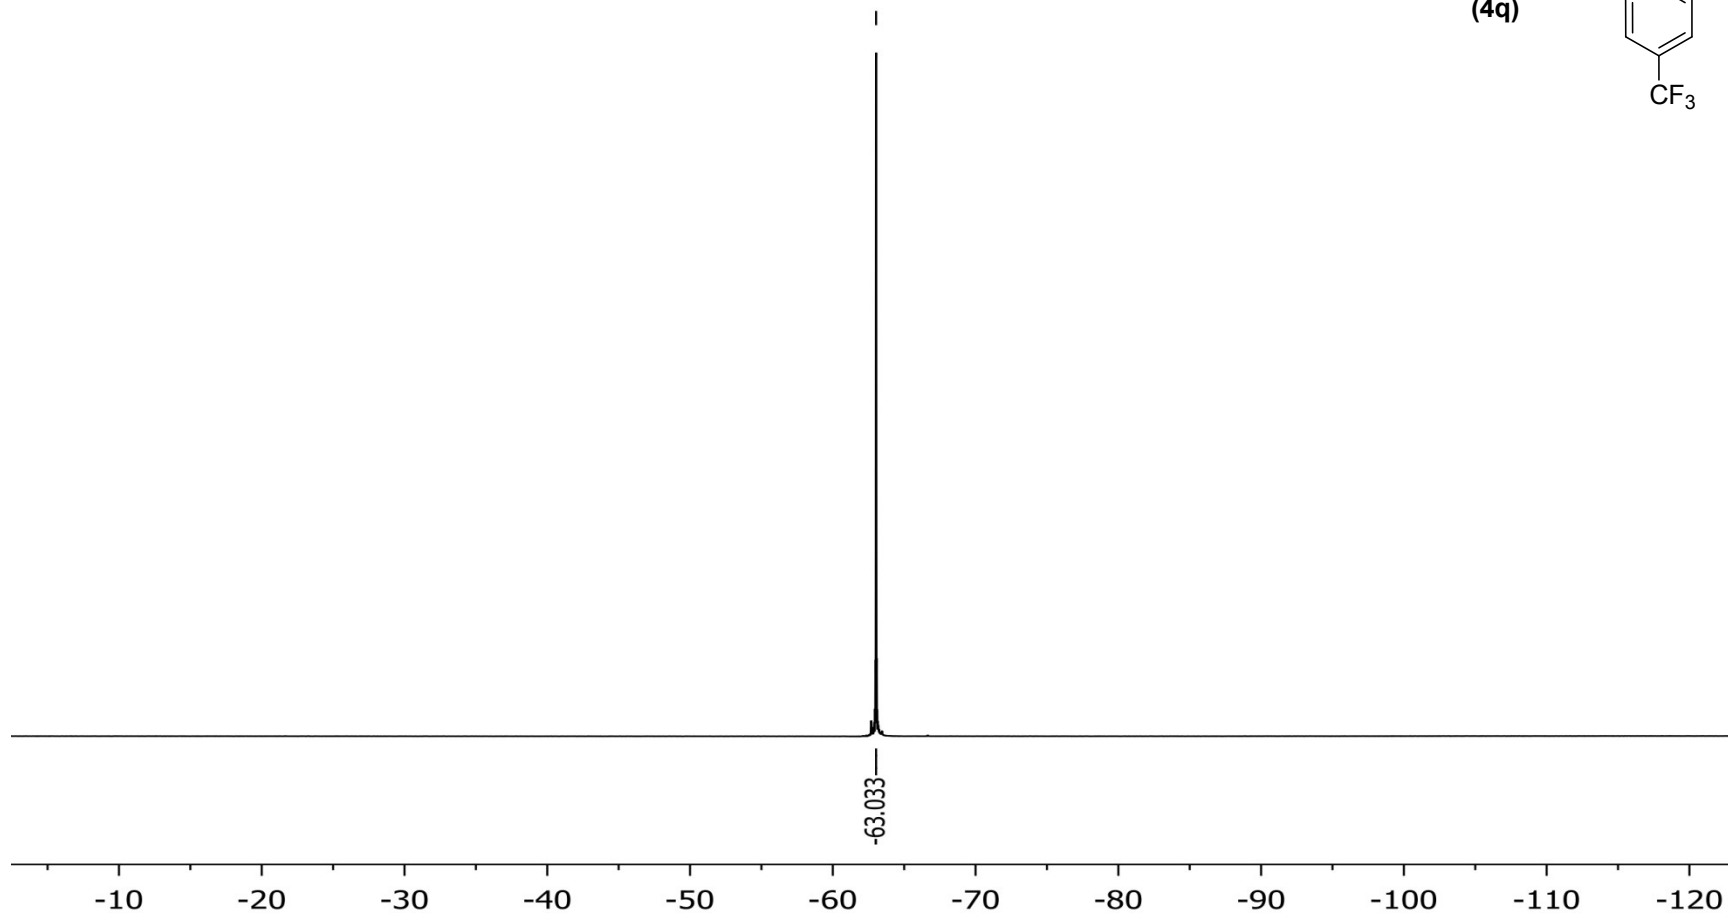

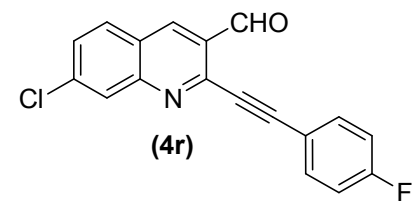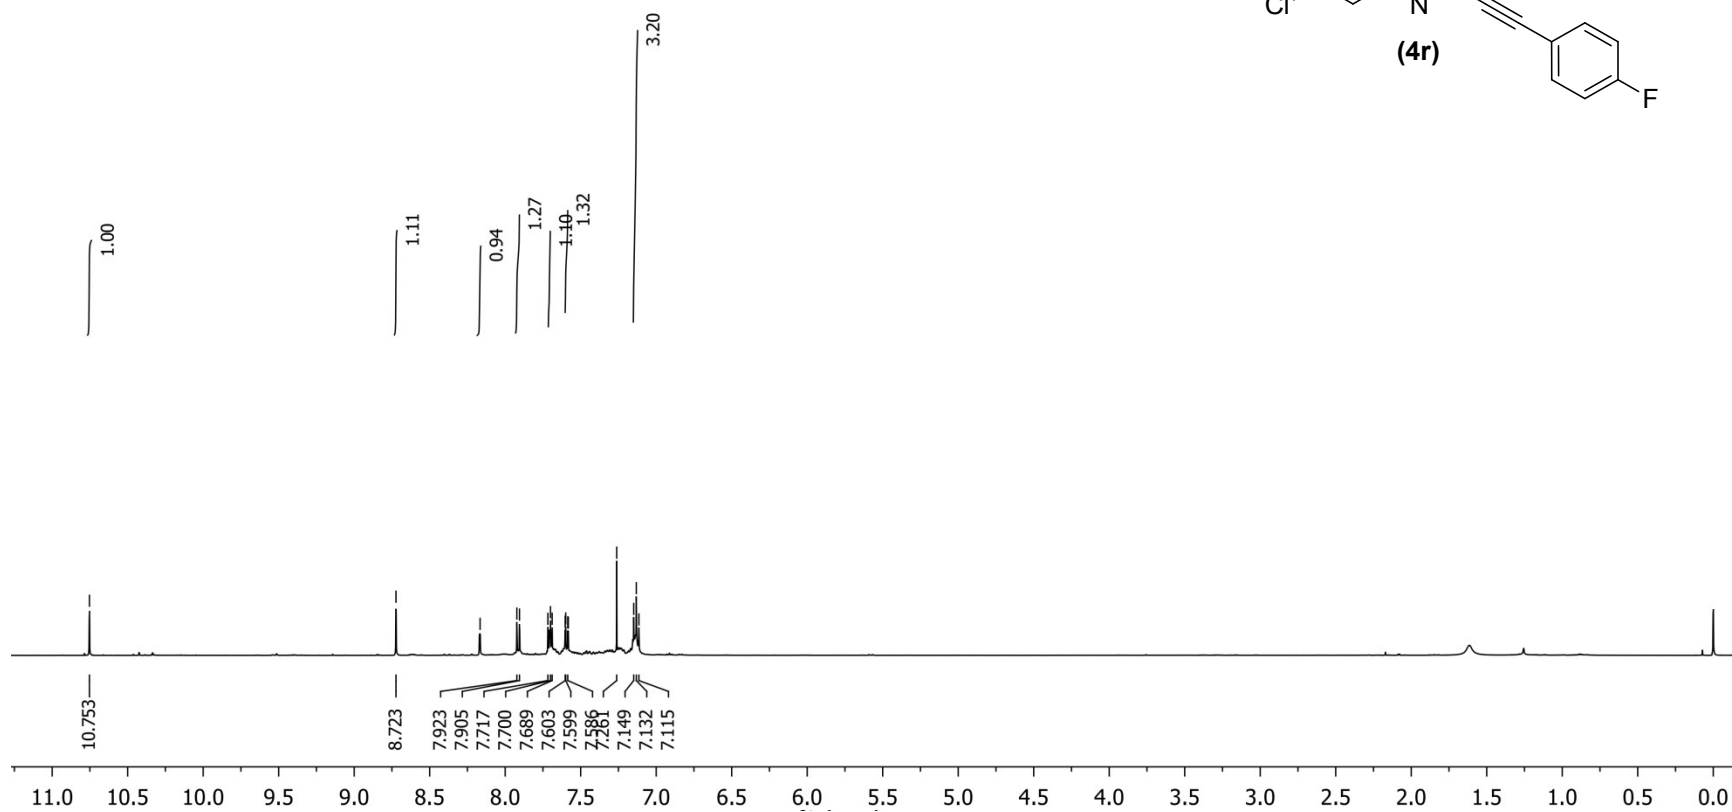

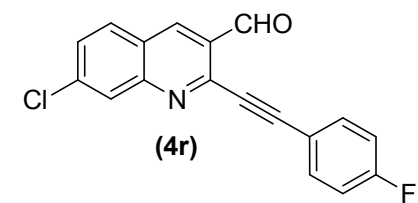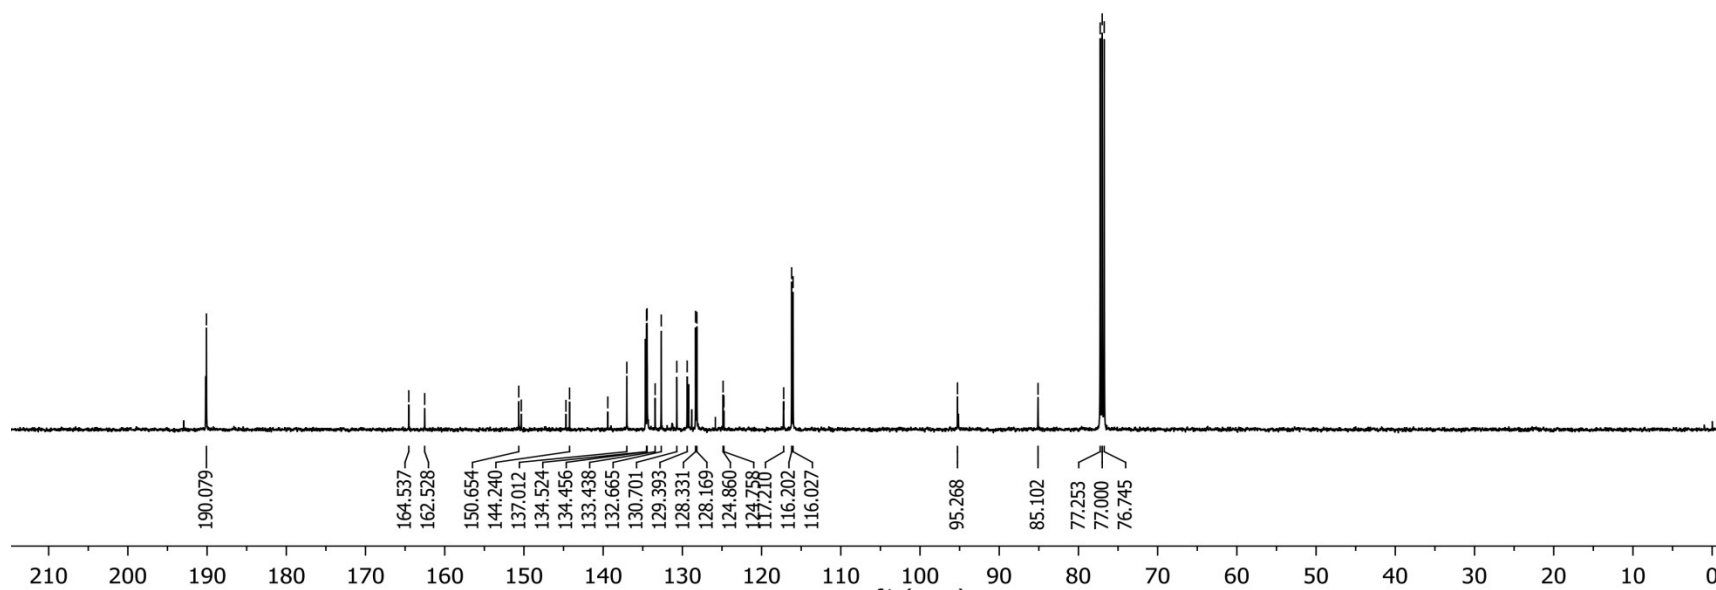

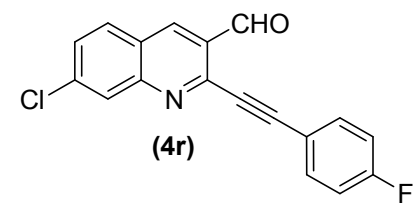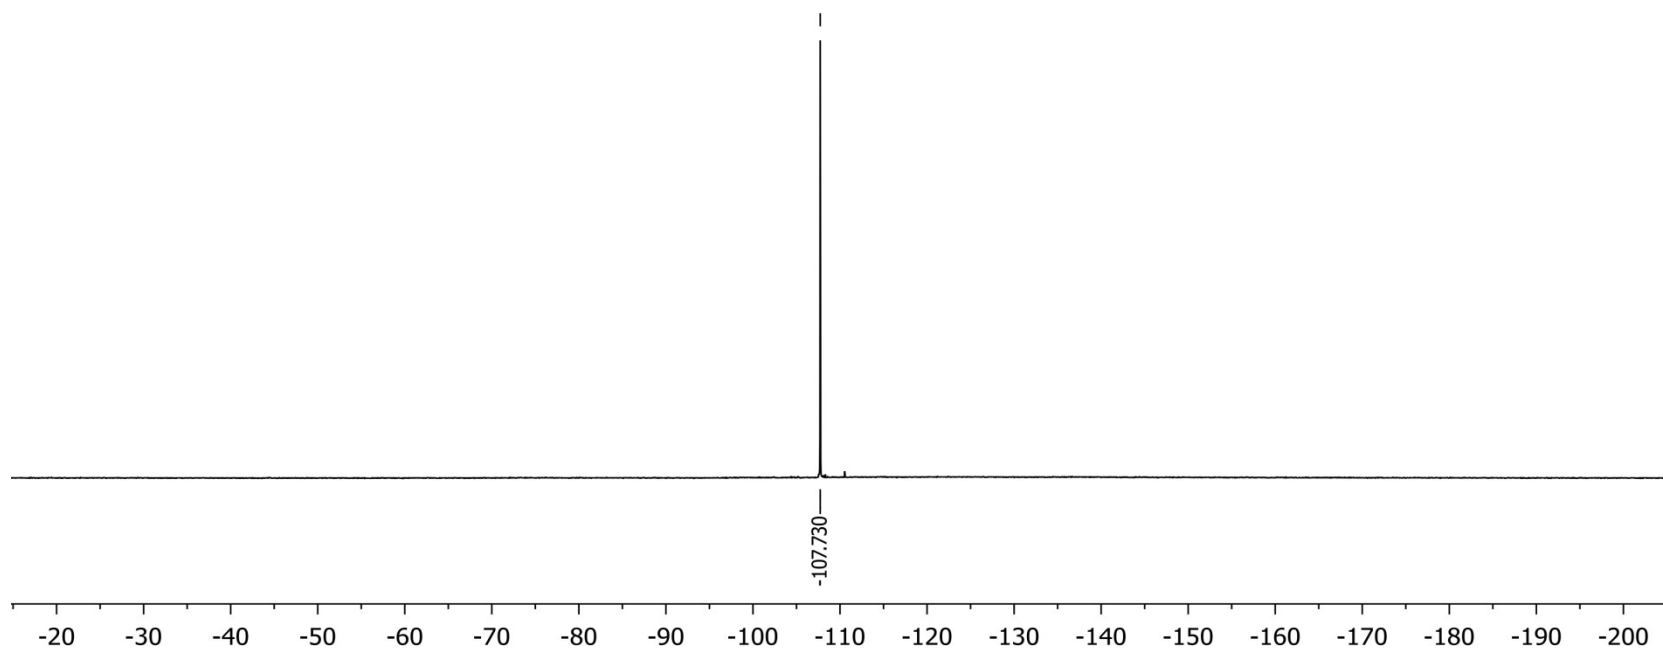

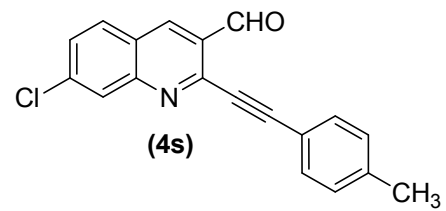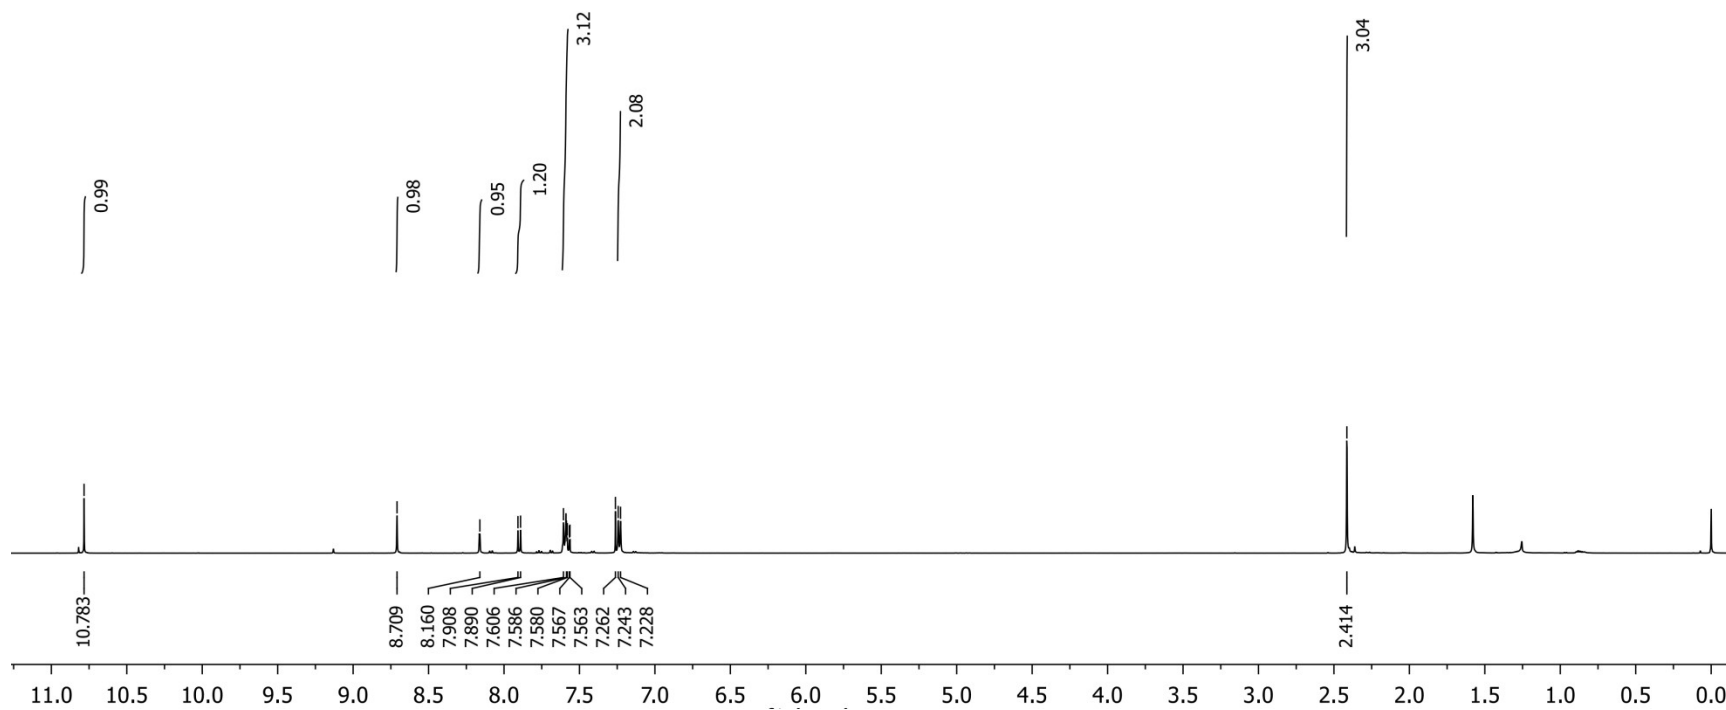

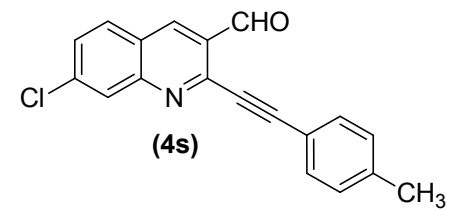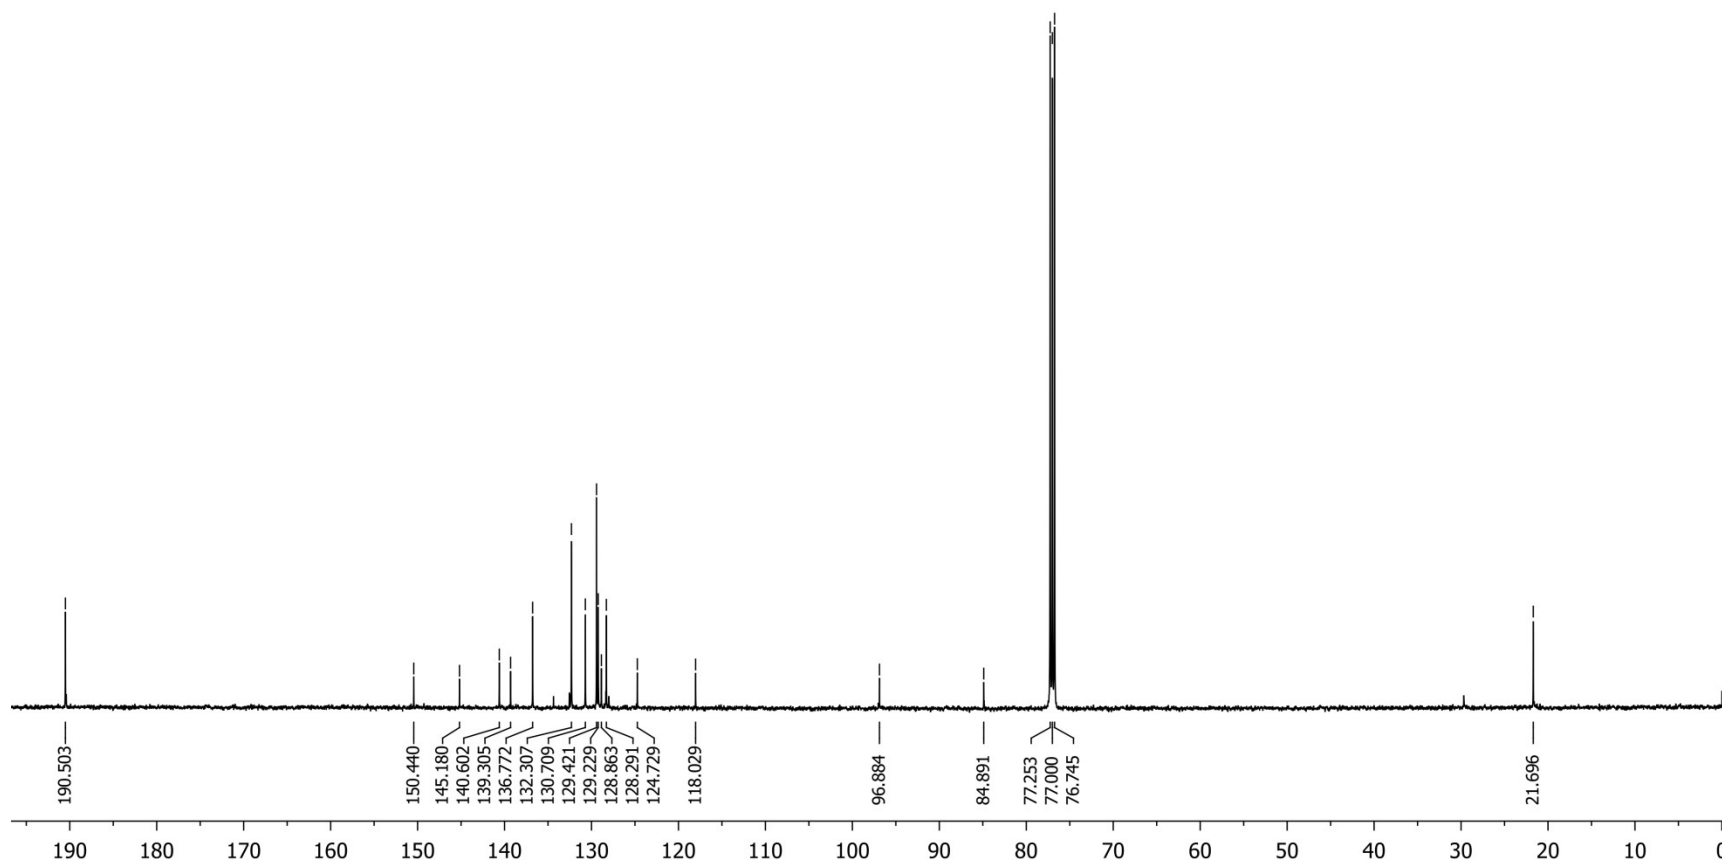

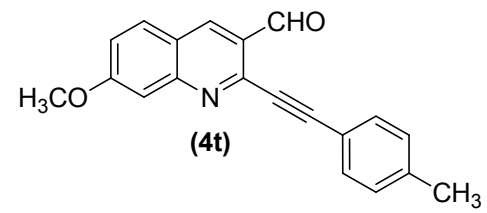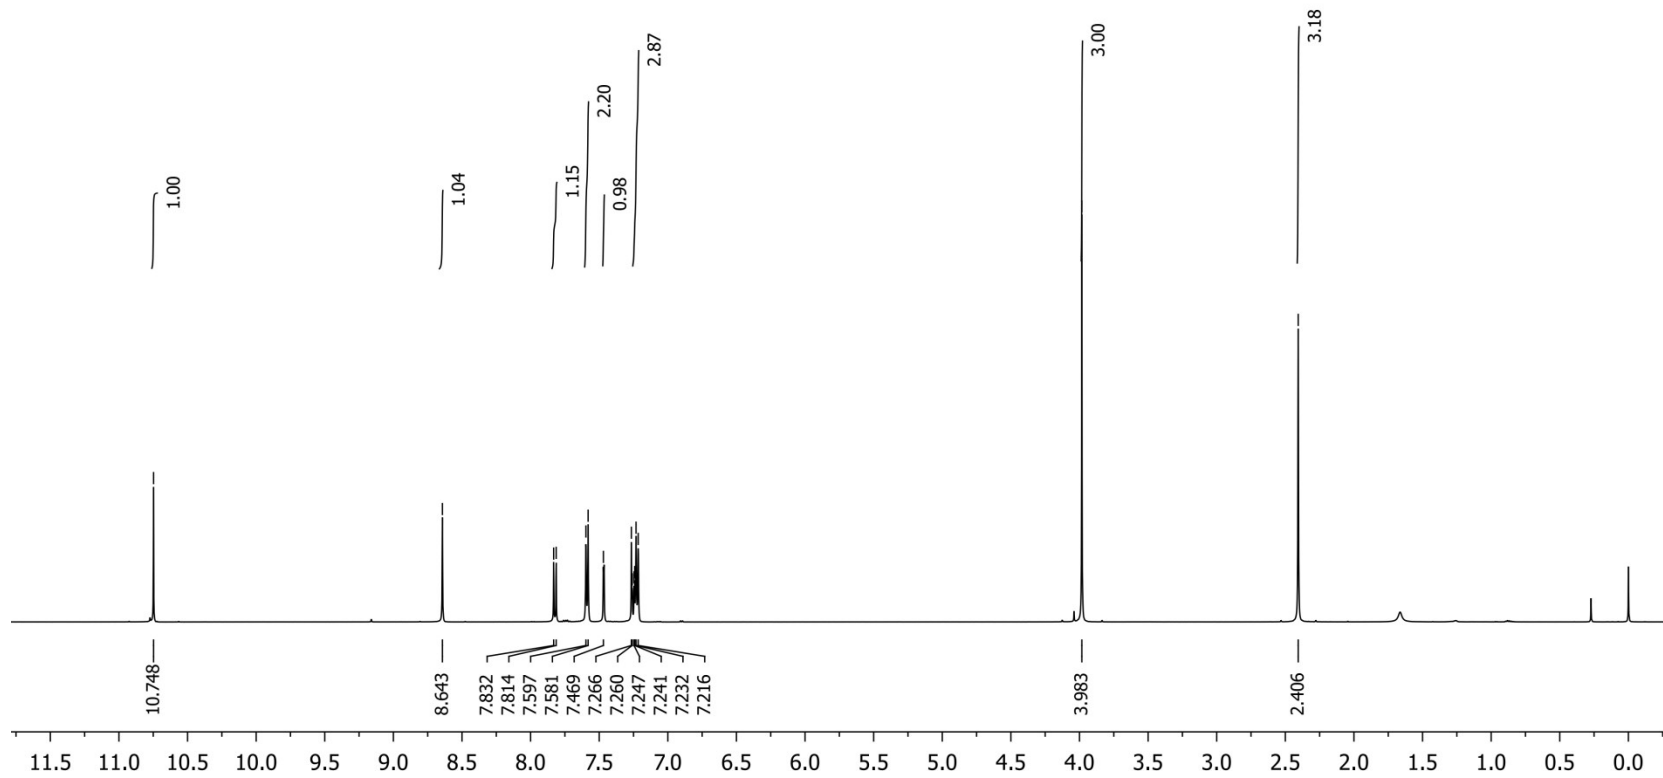



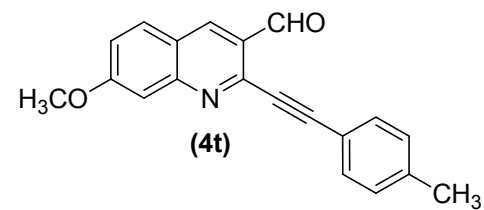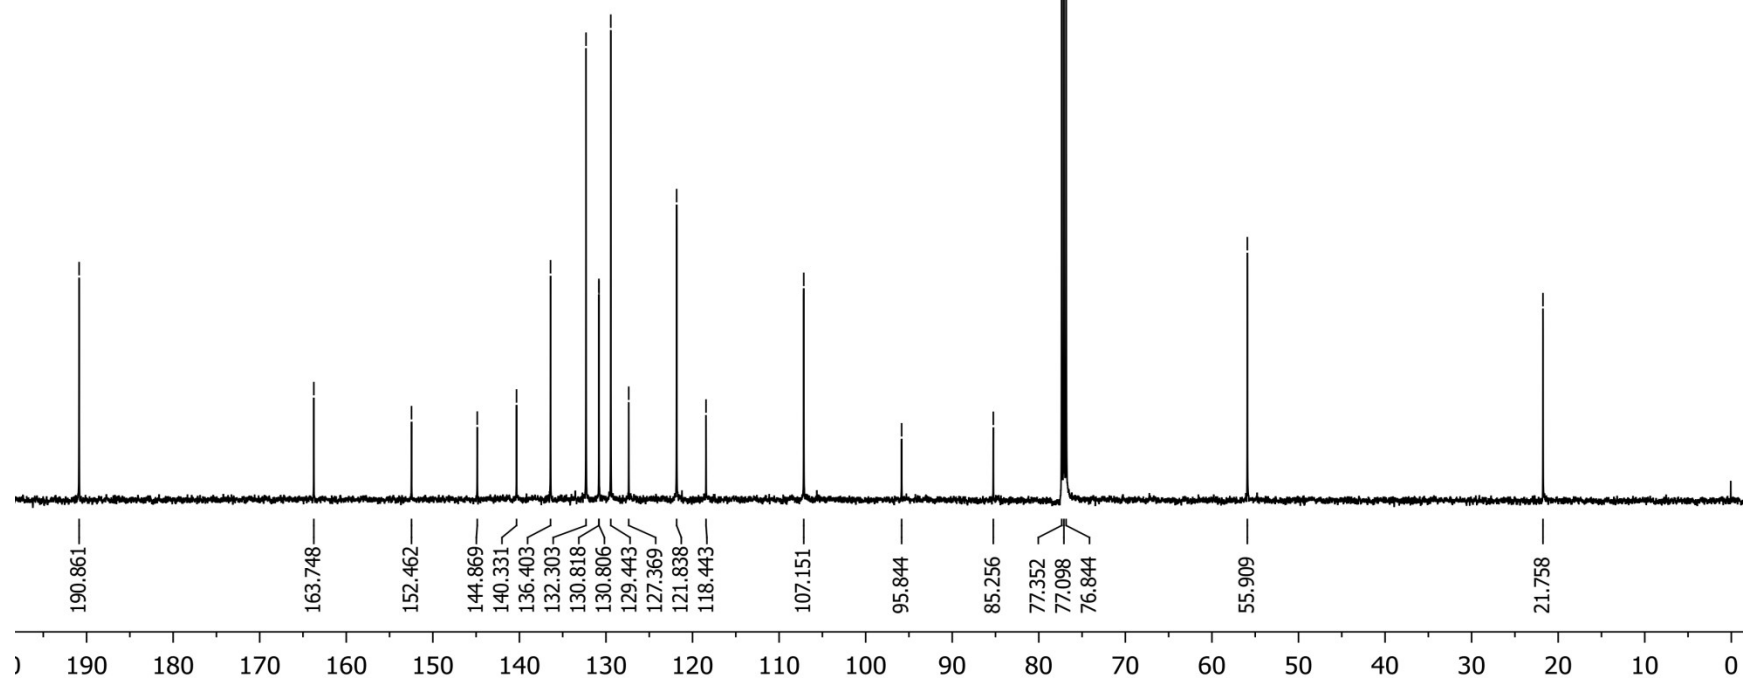

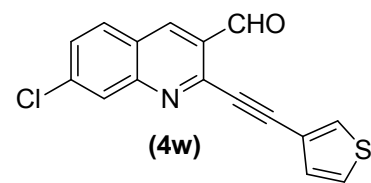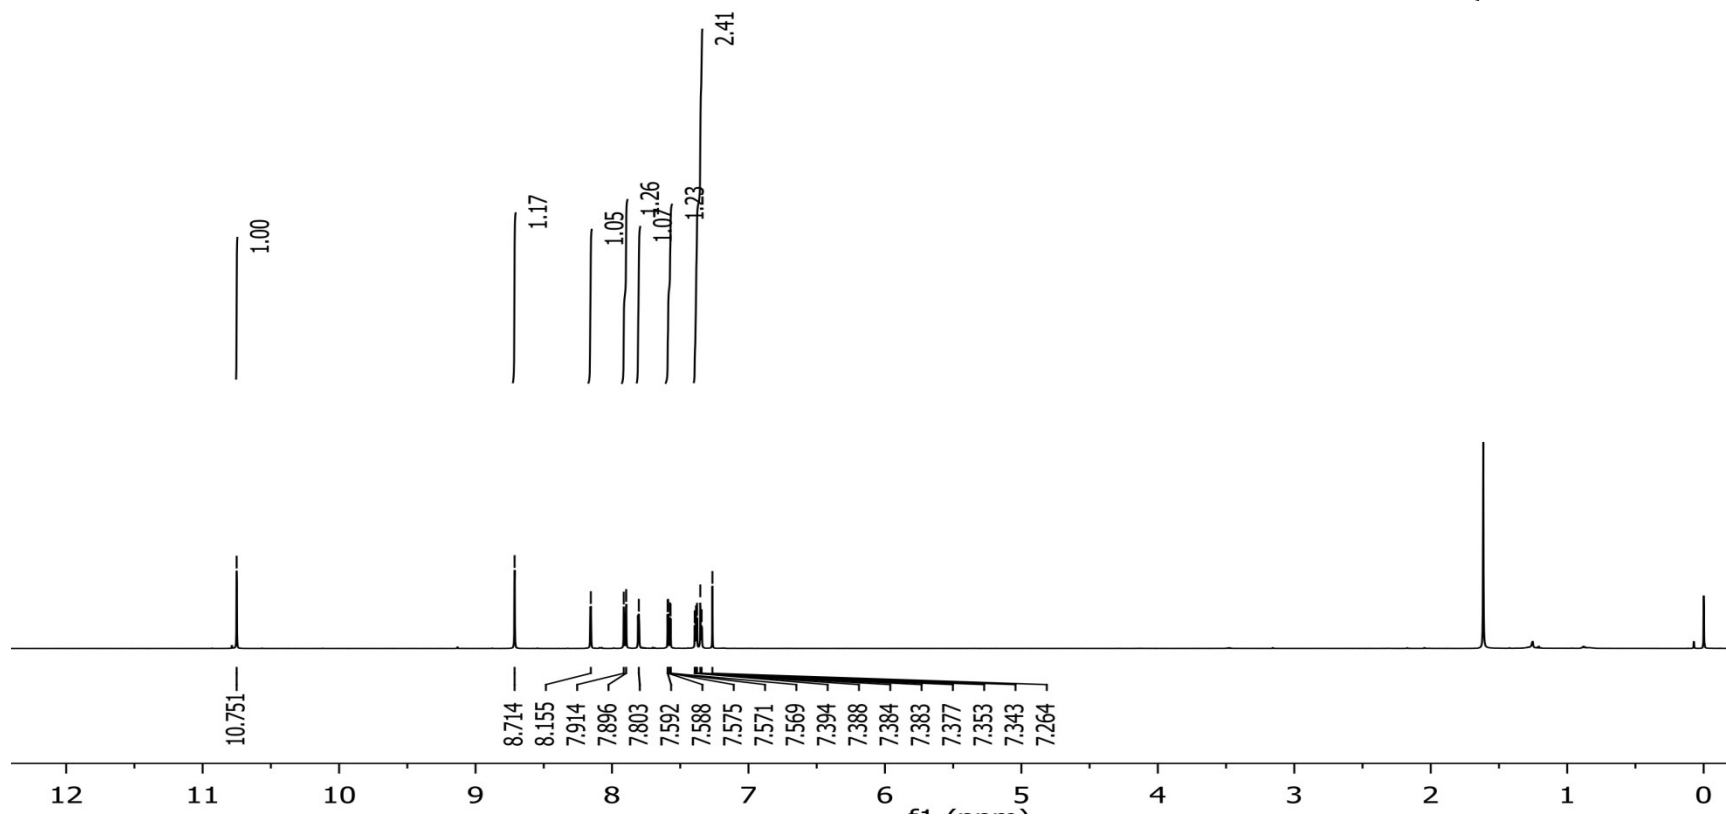

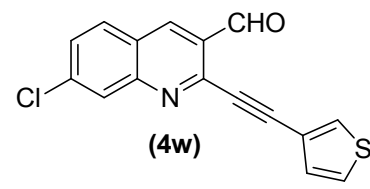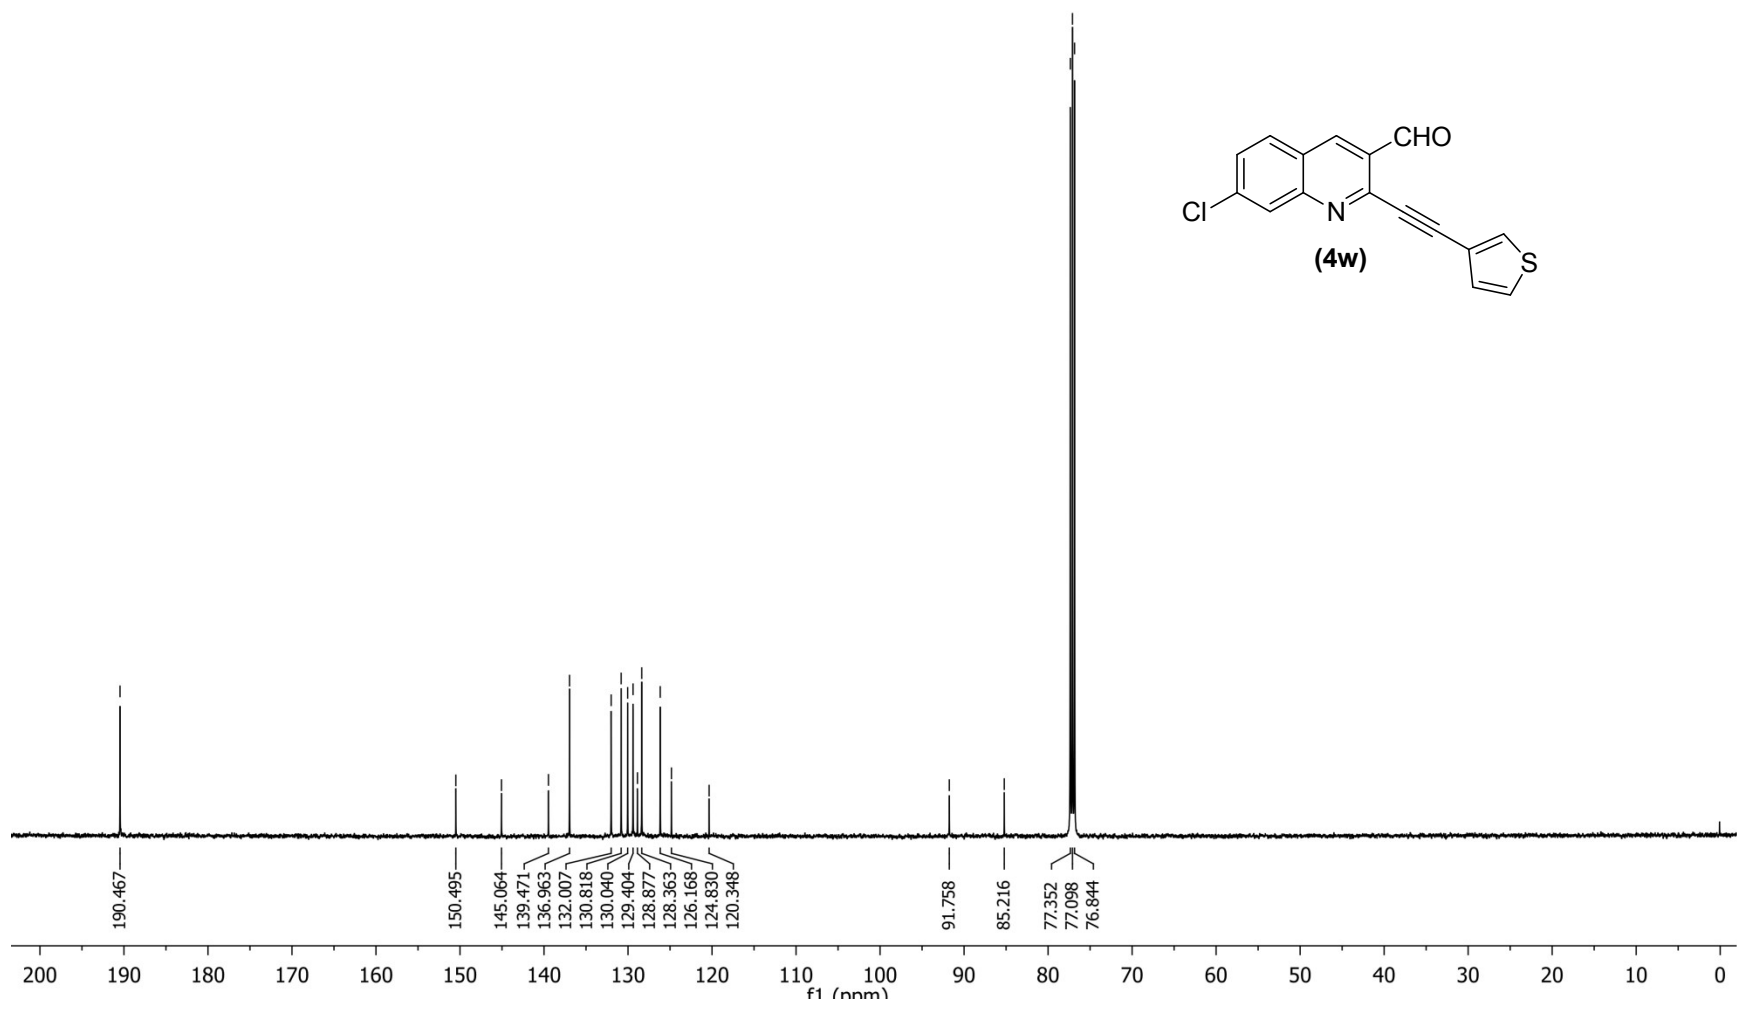

$^1\text{H}$  NMR (500 MHz),  $^{13}\text{C}$  NMR (125 MHz) and  $^{19}\text{F}$  NMR (500 MHz) spectra of annulated product

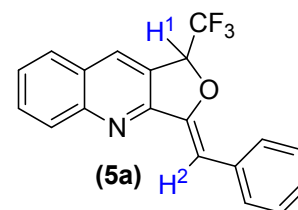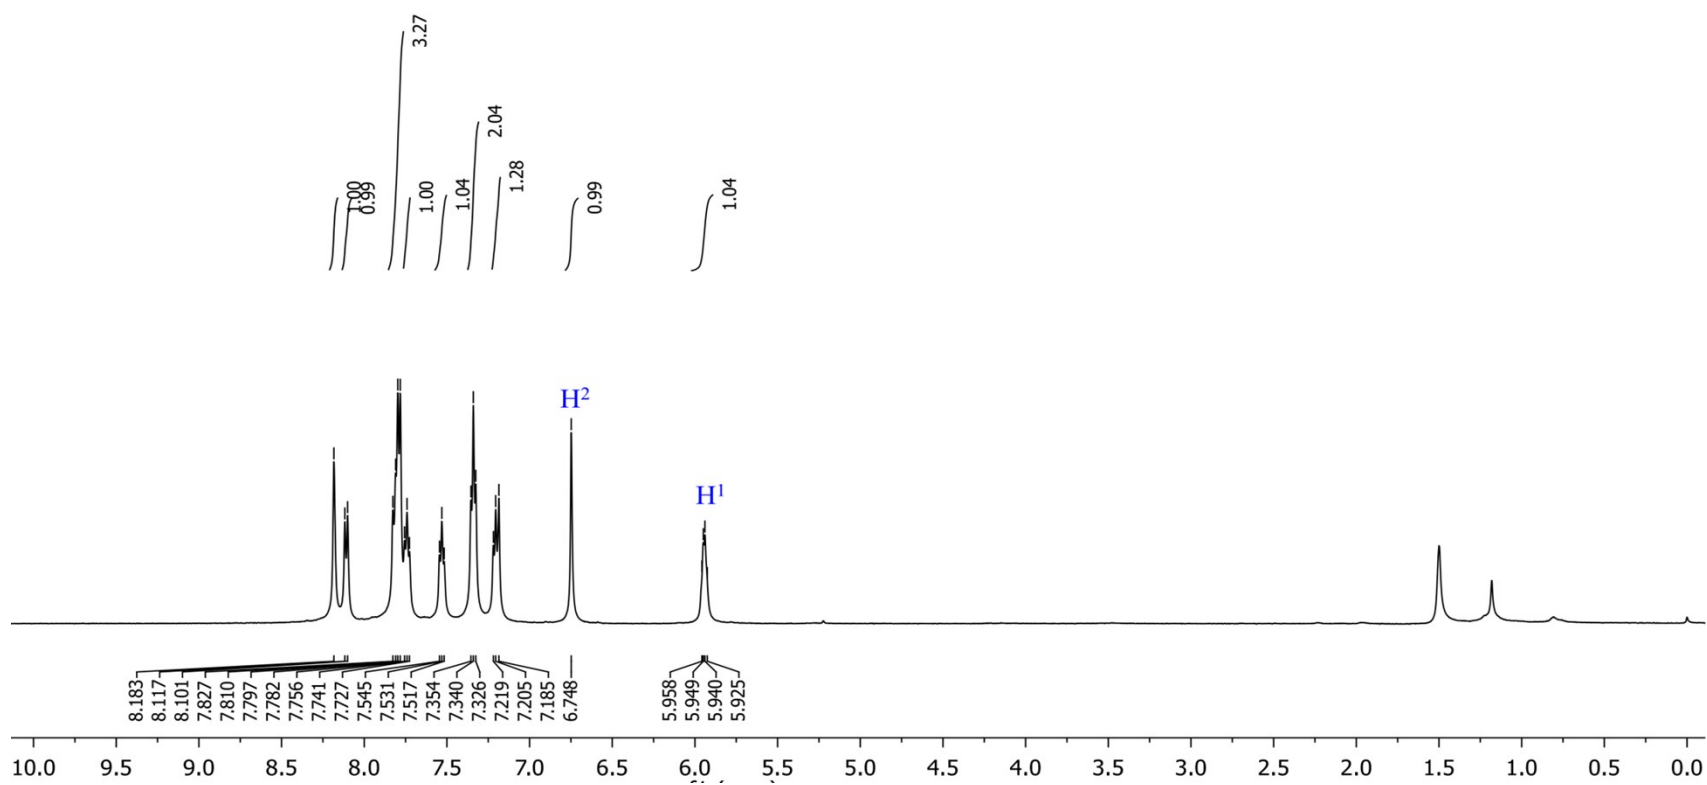

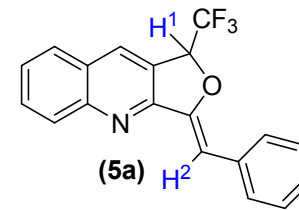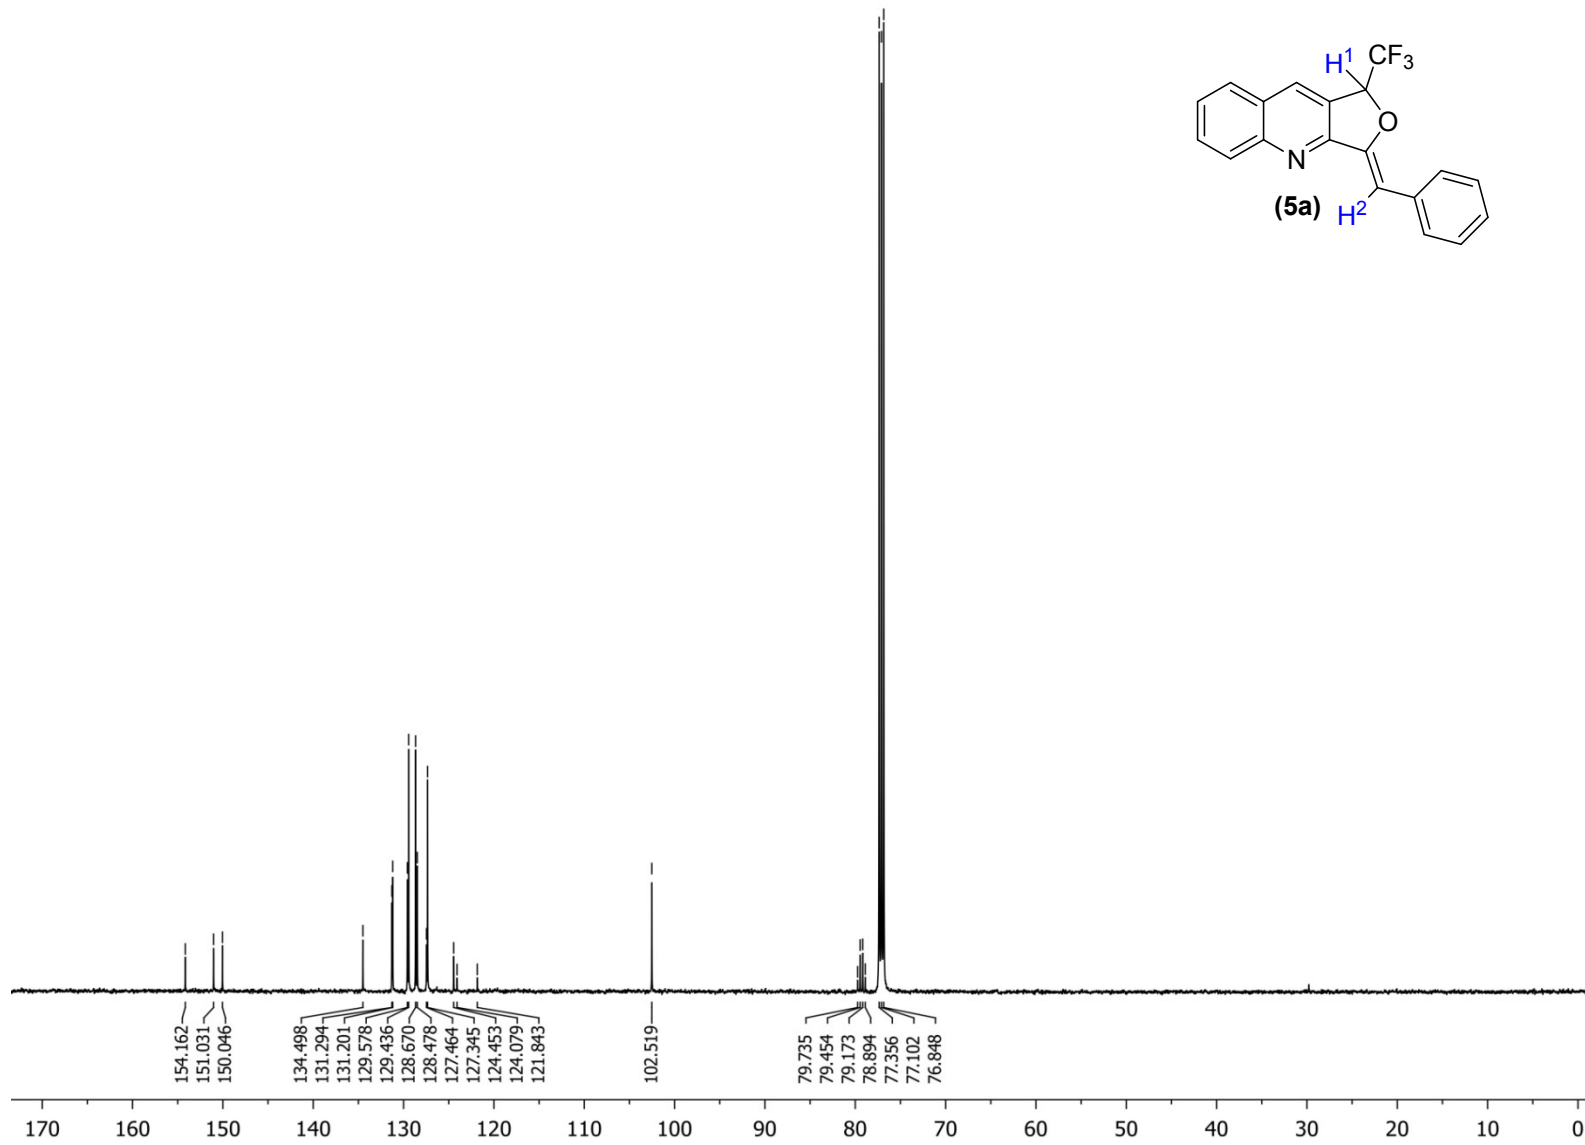

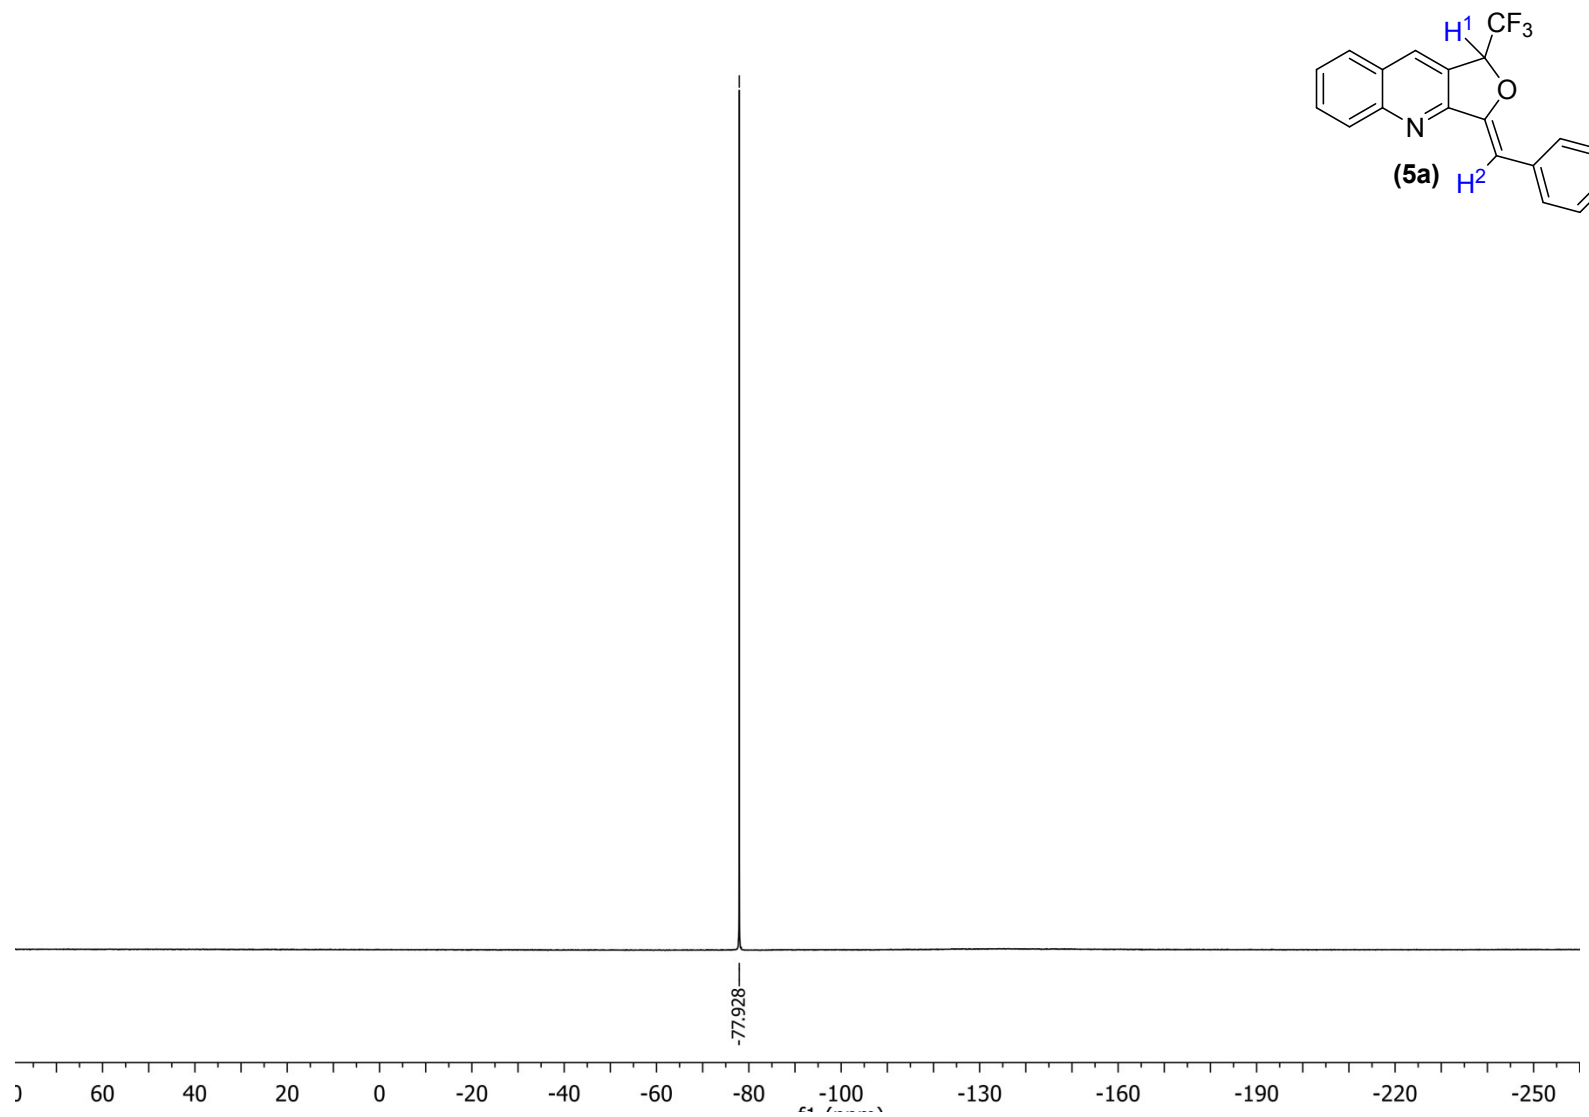

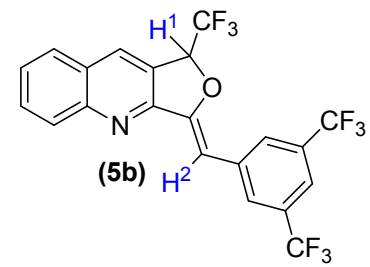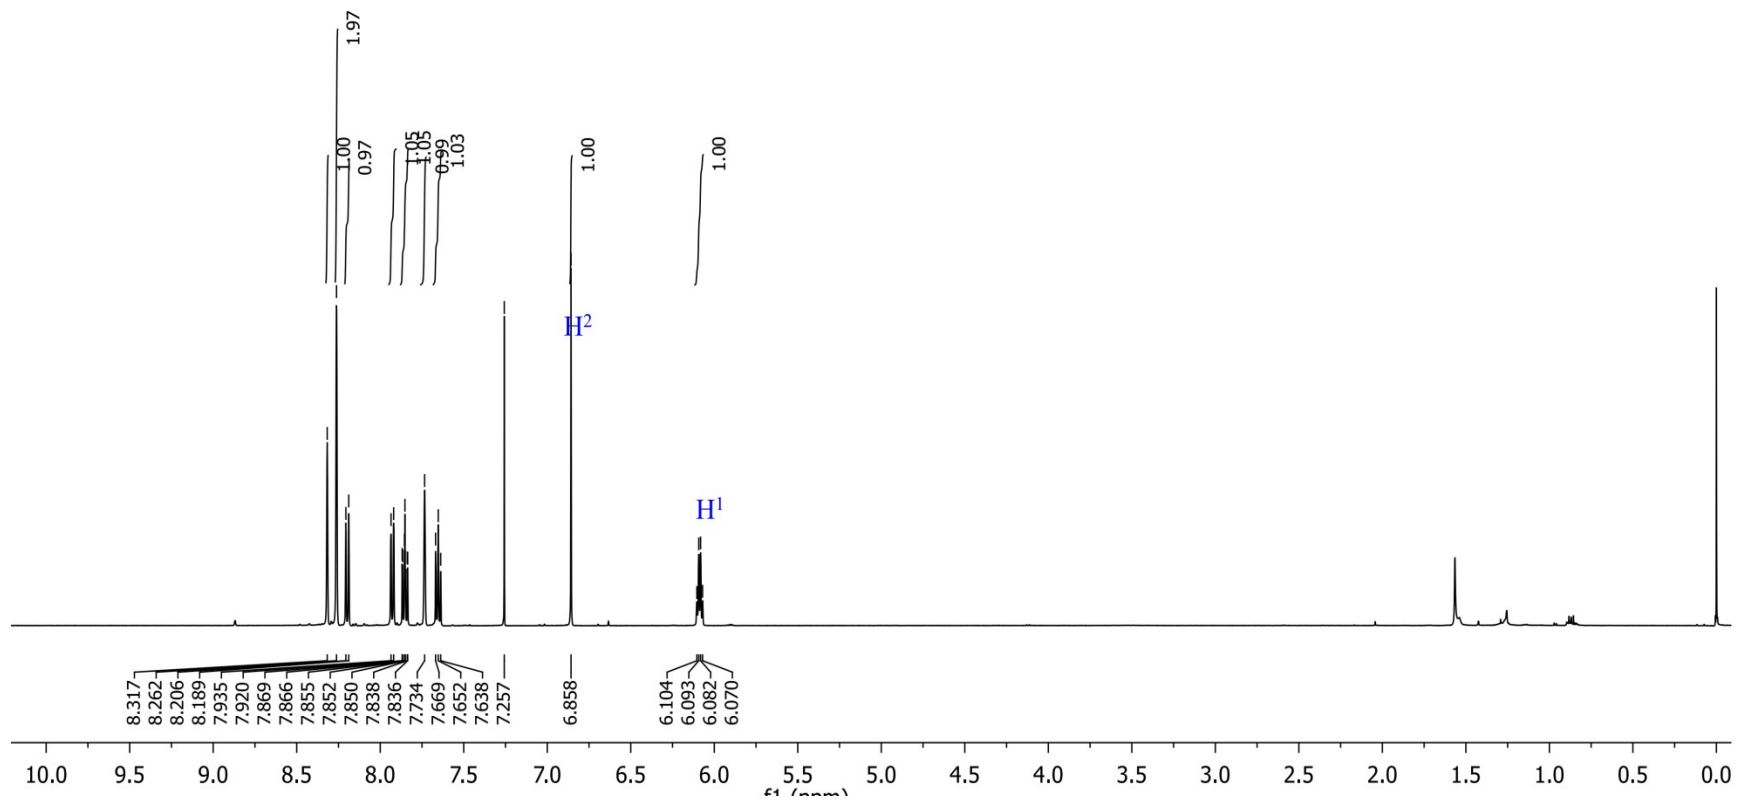

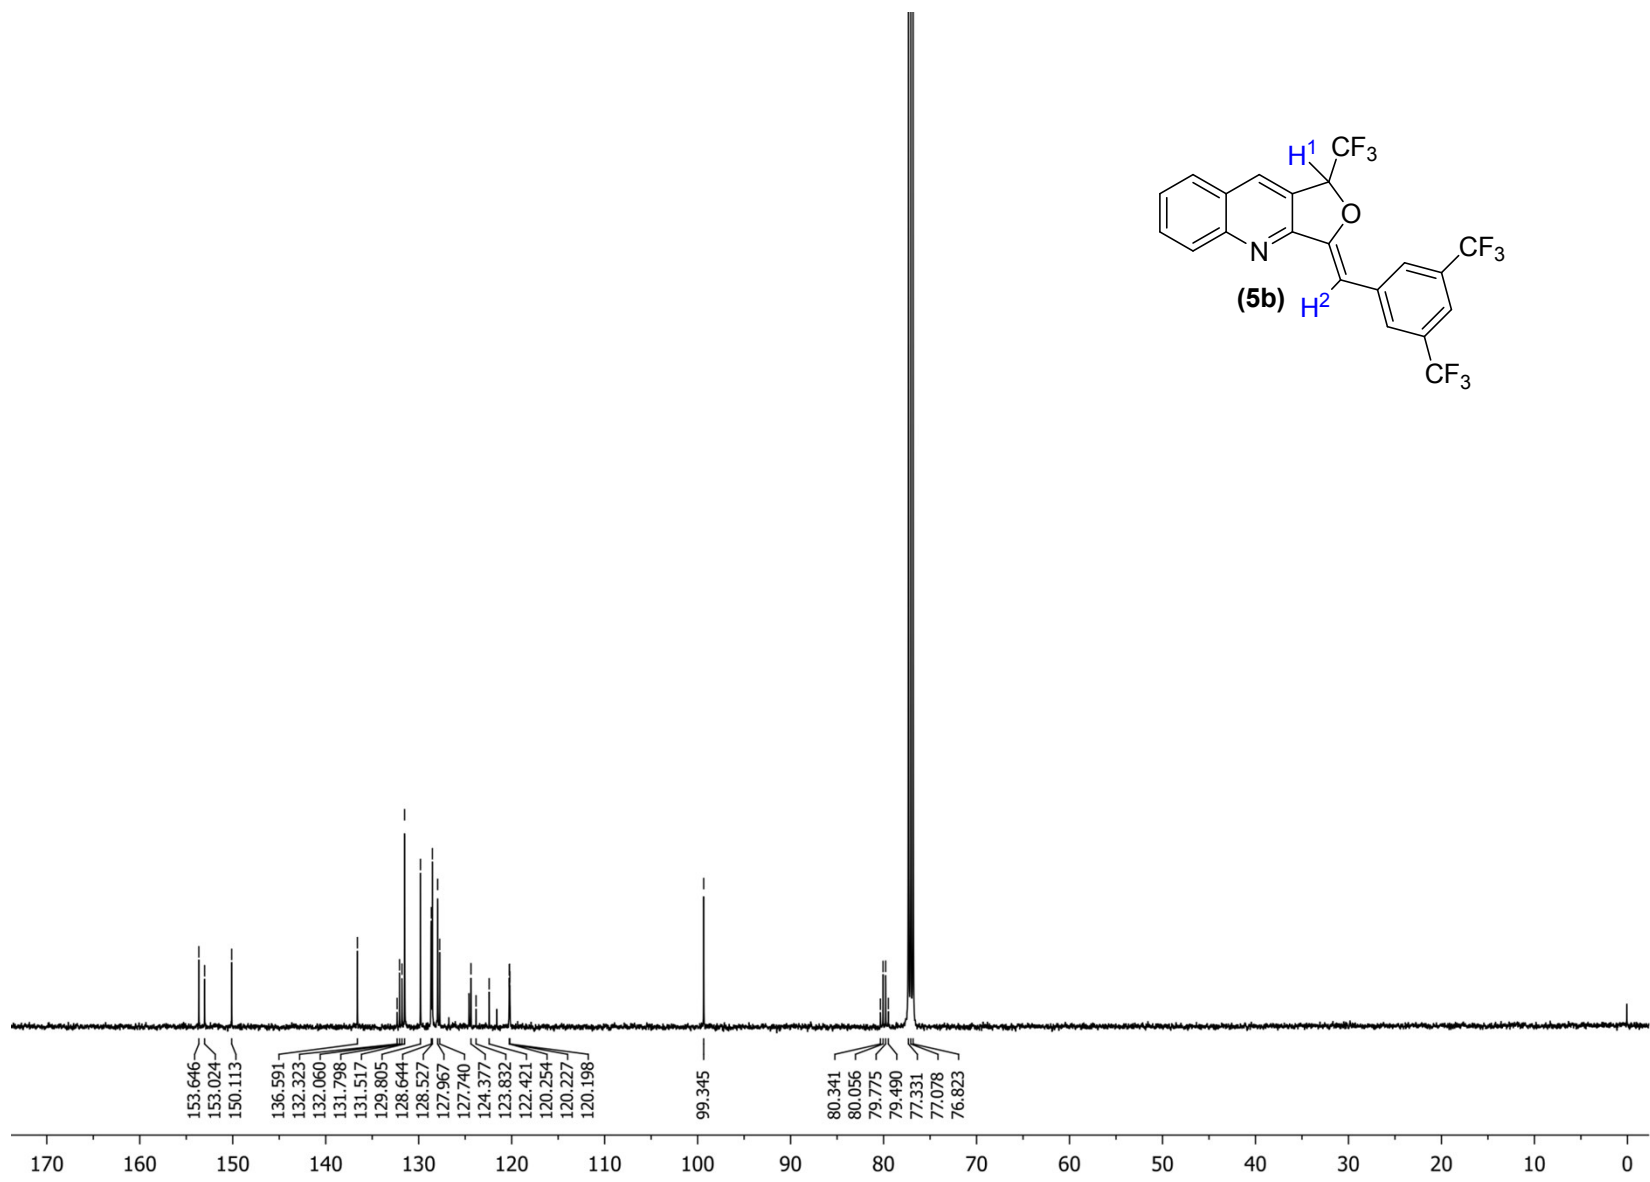



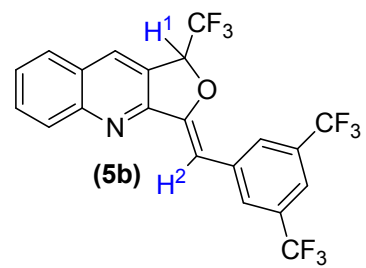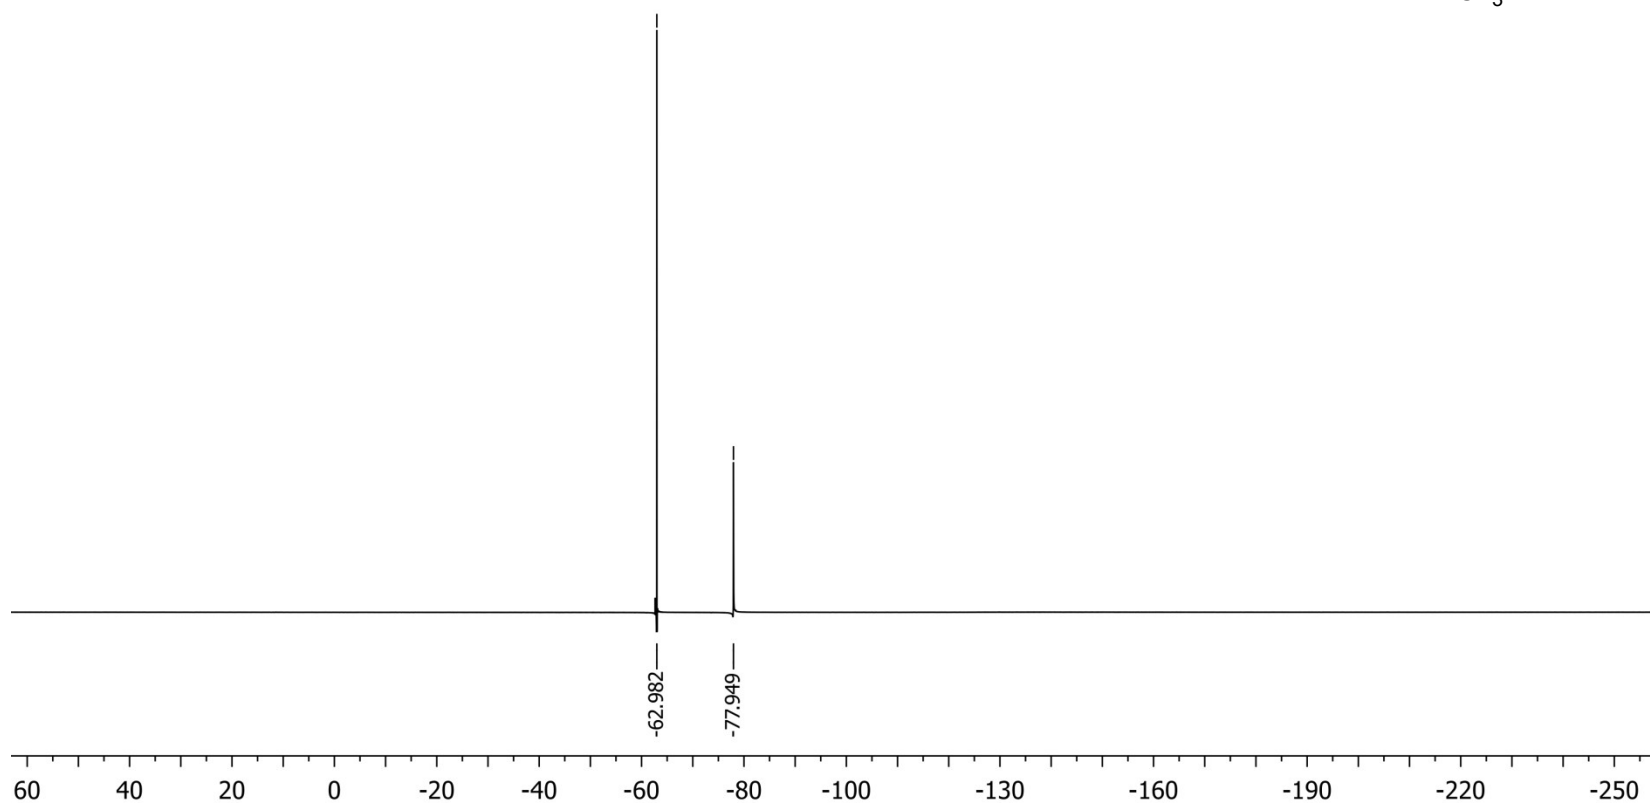

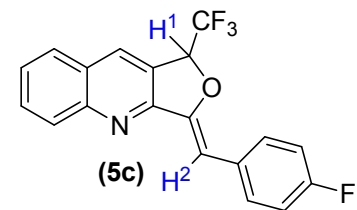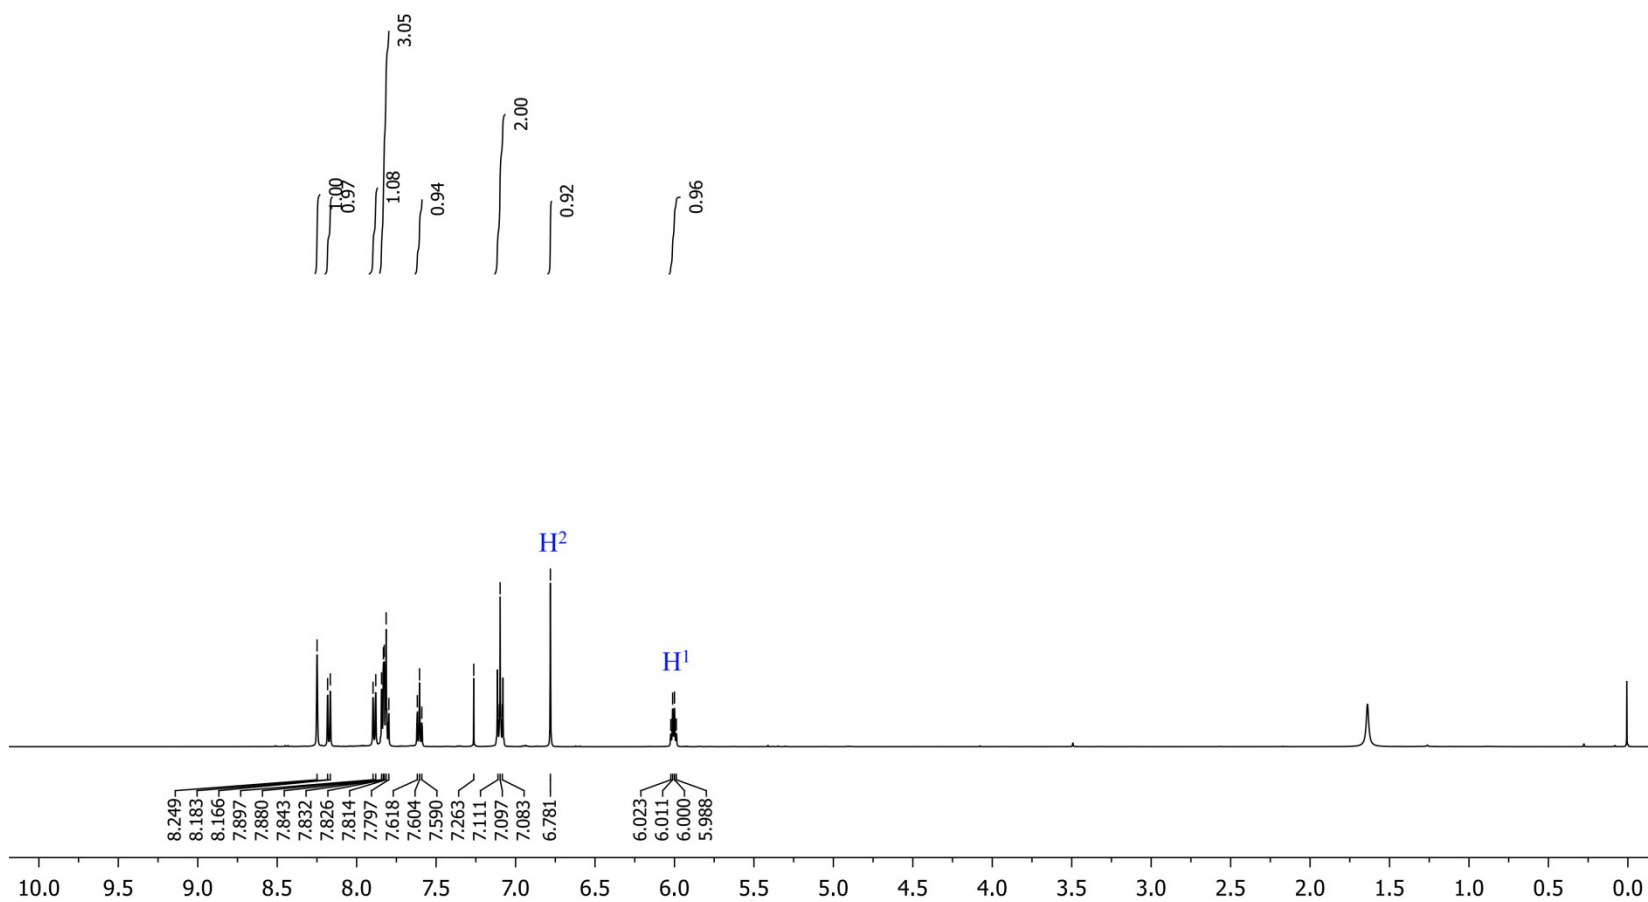

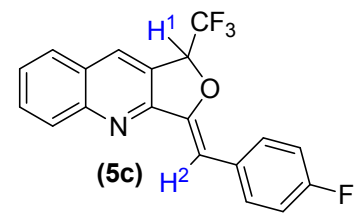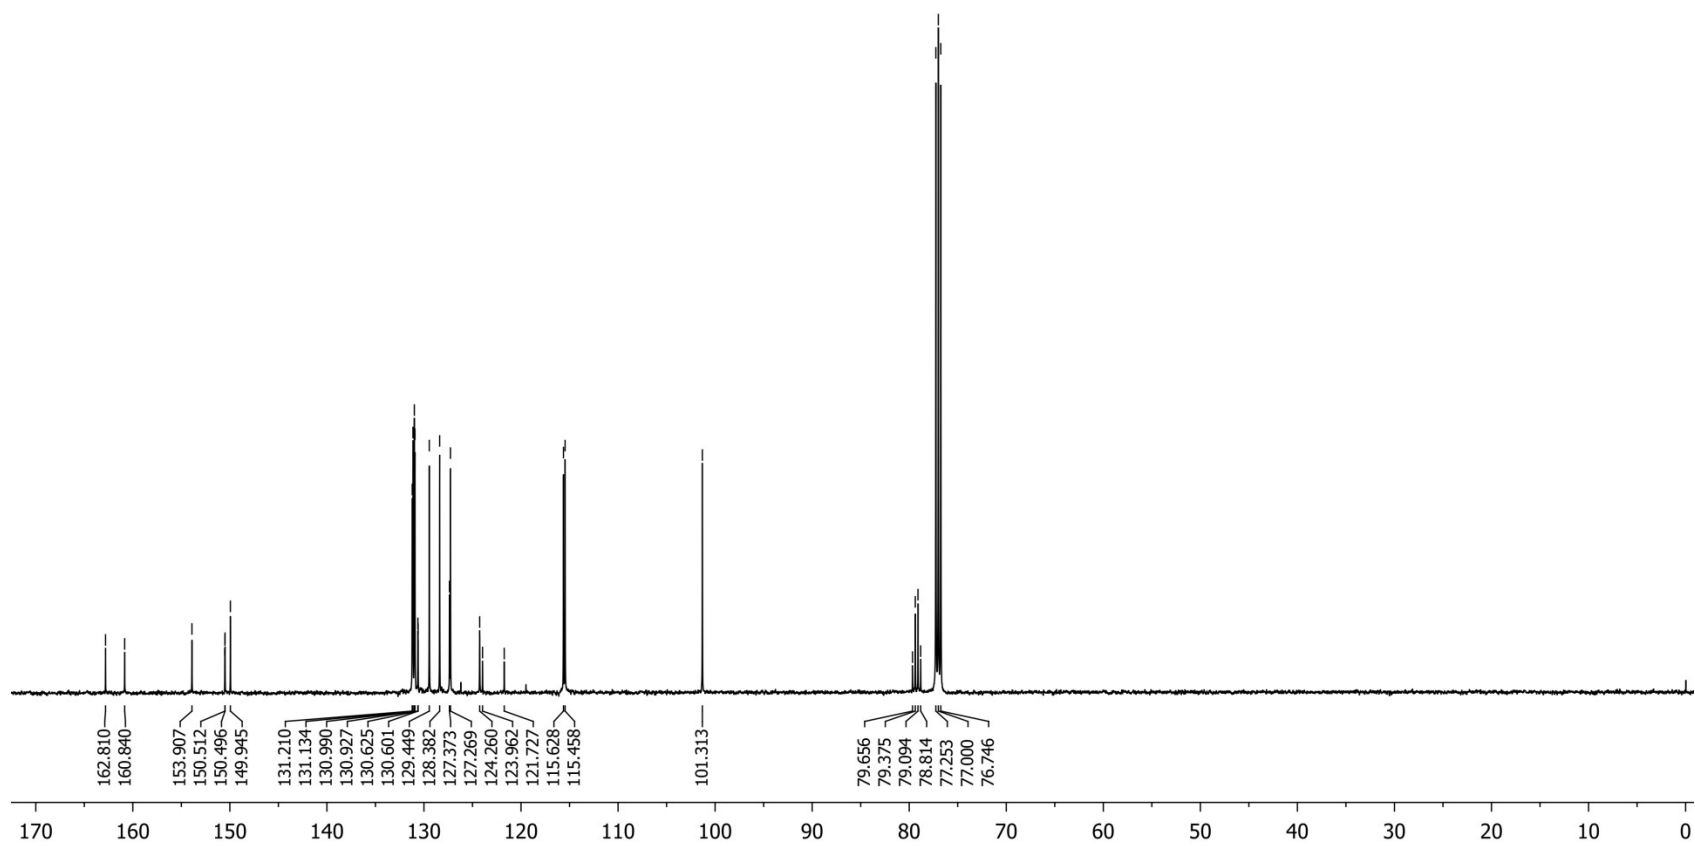

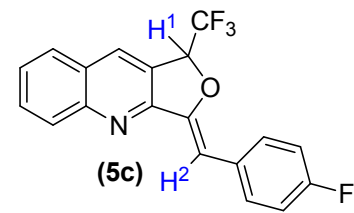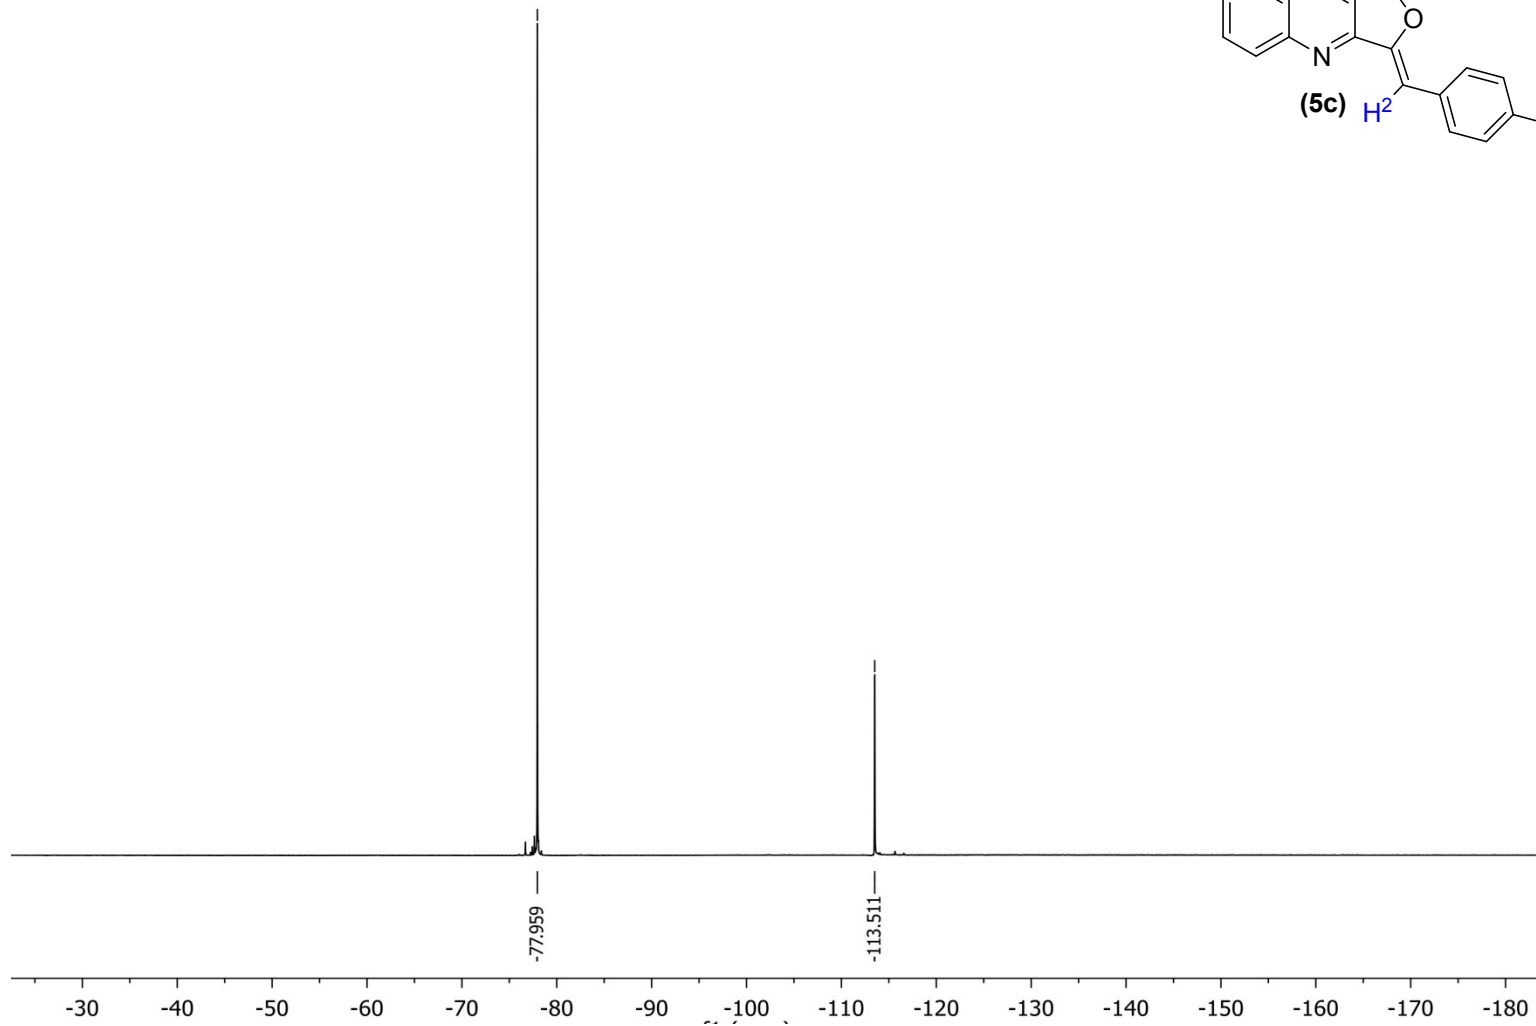

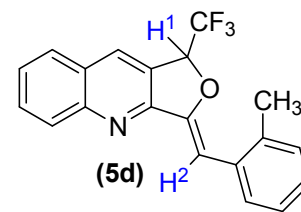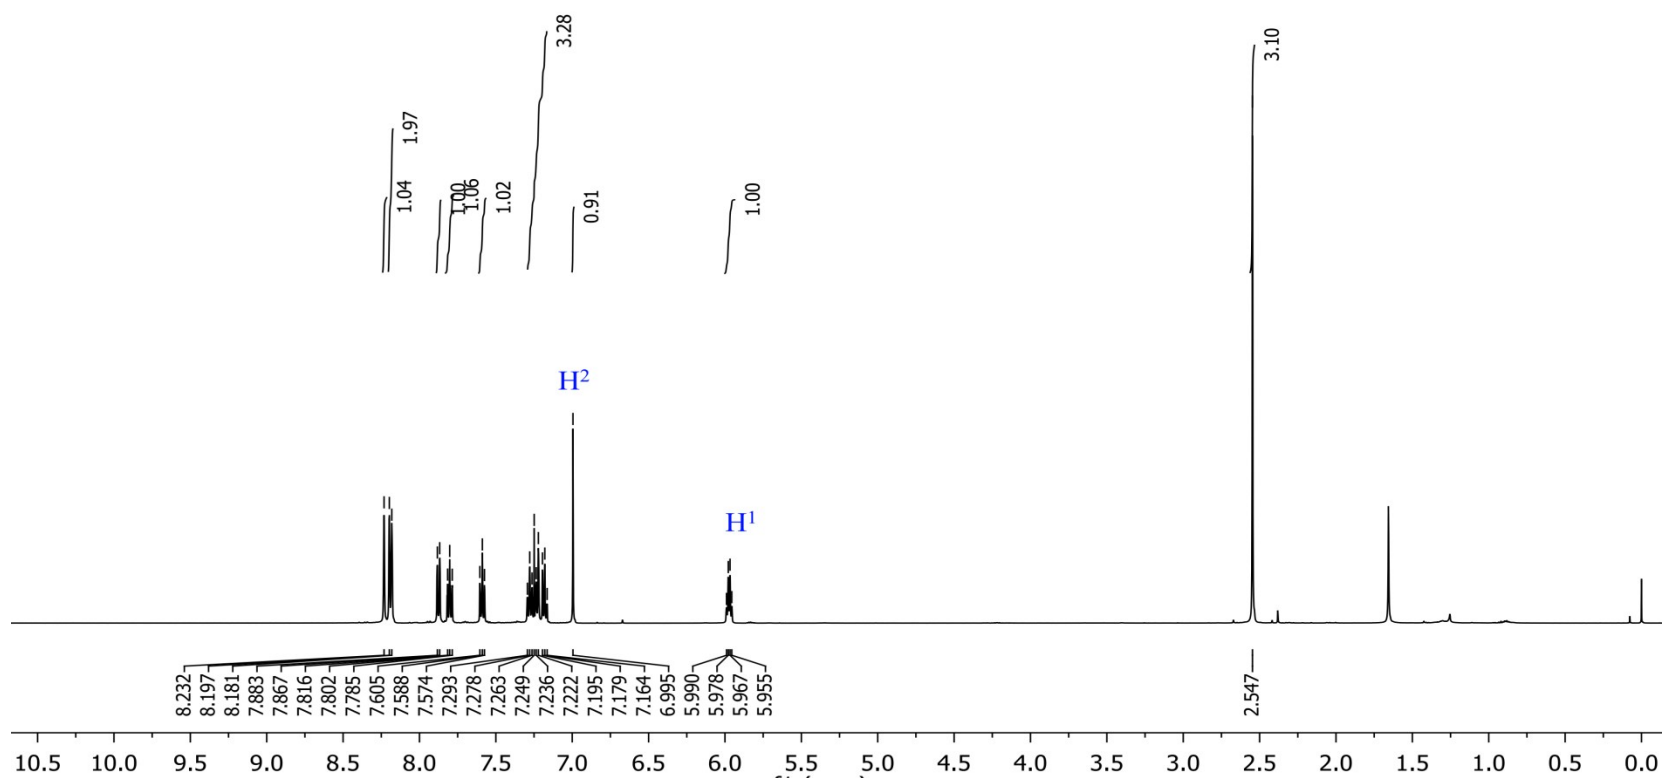

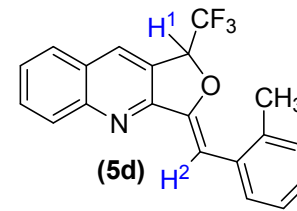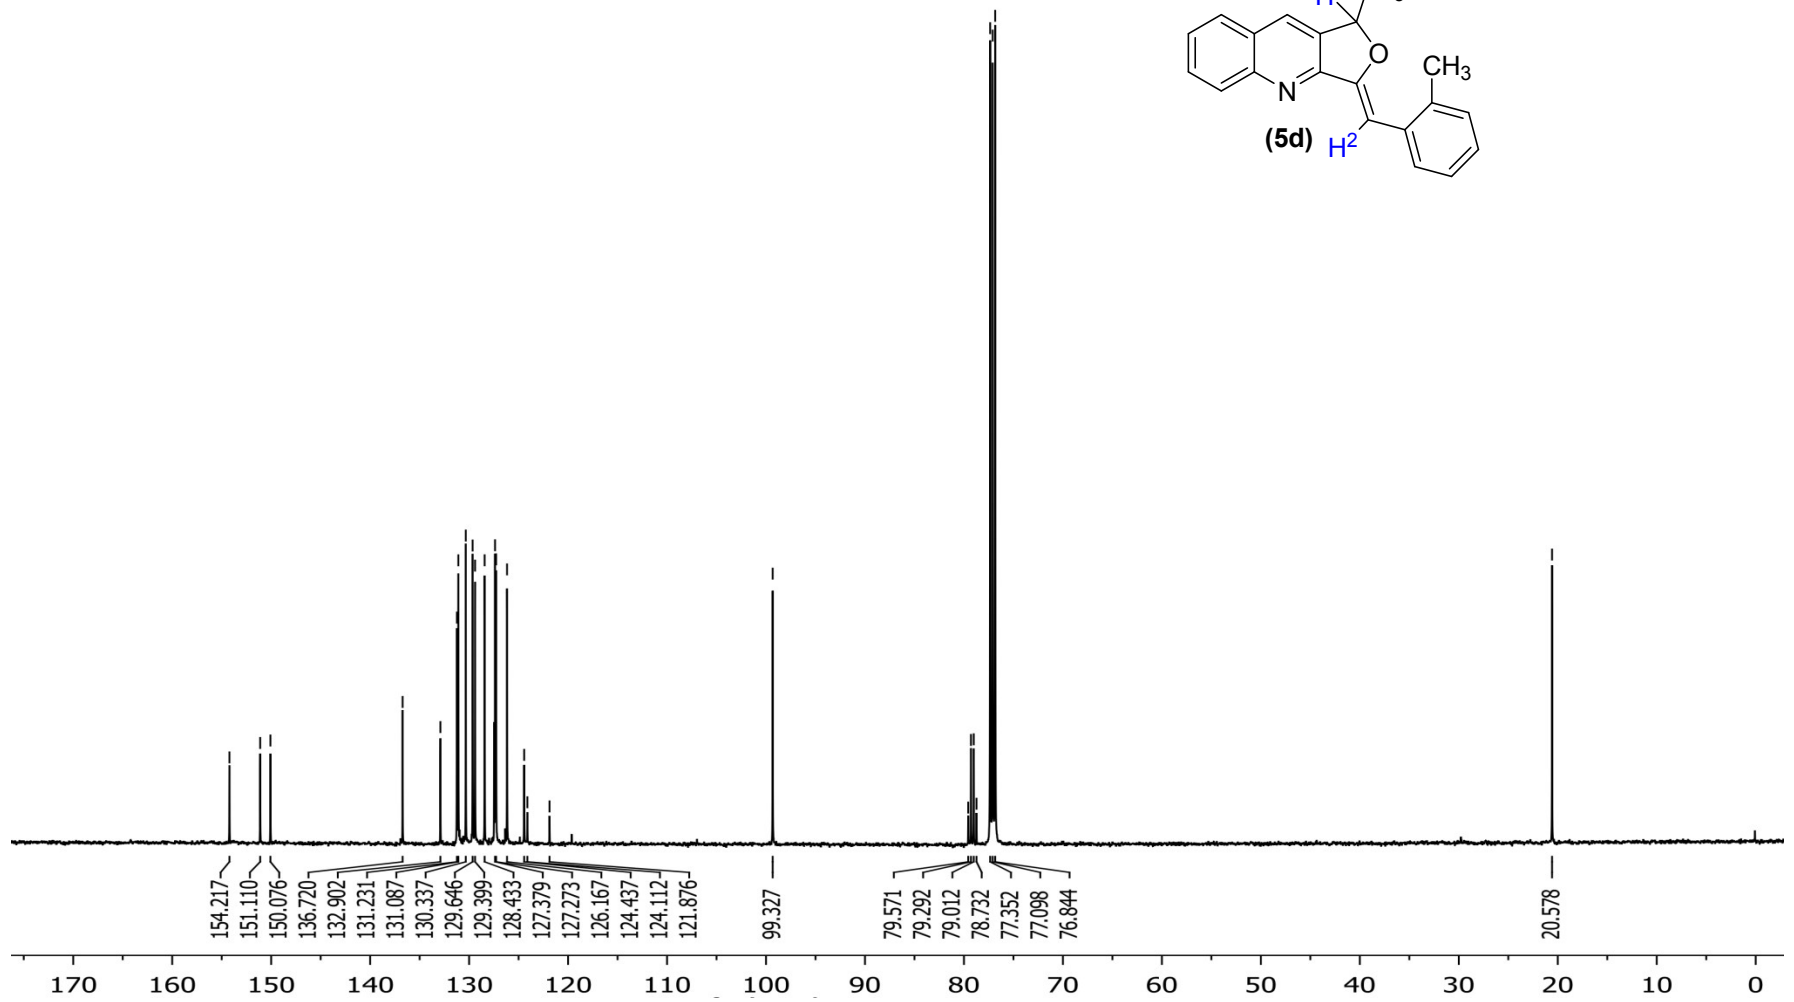

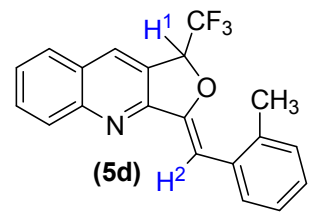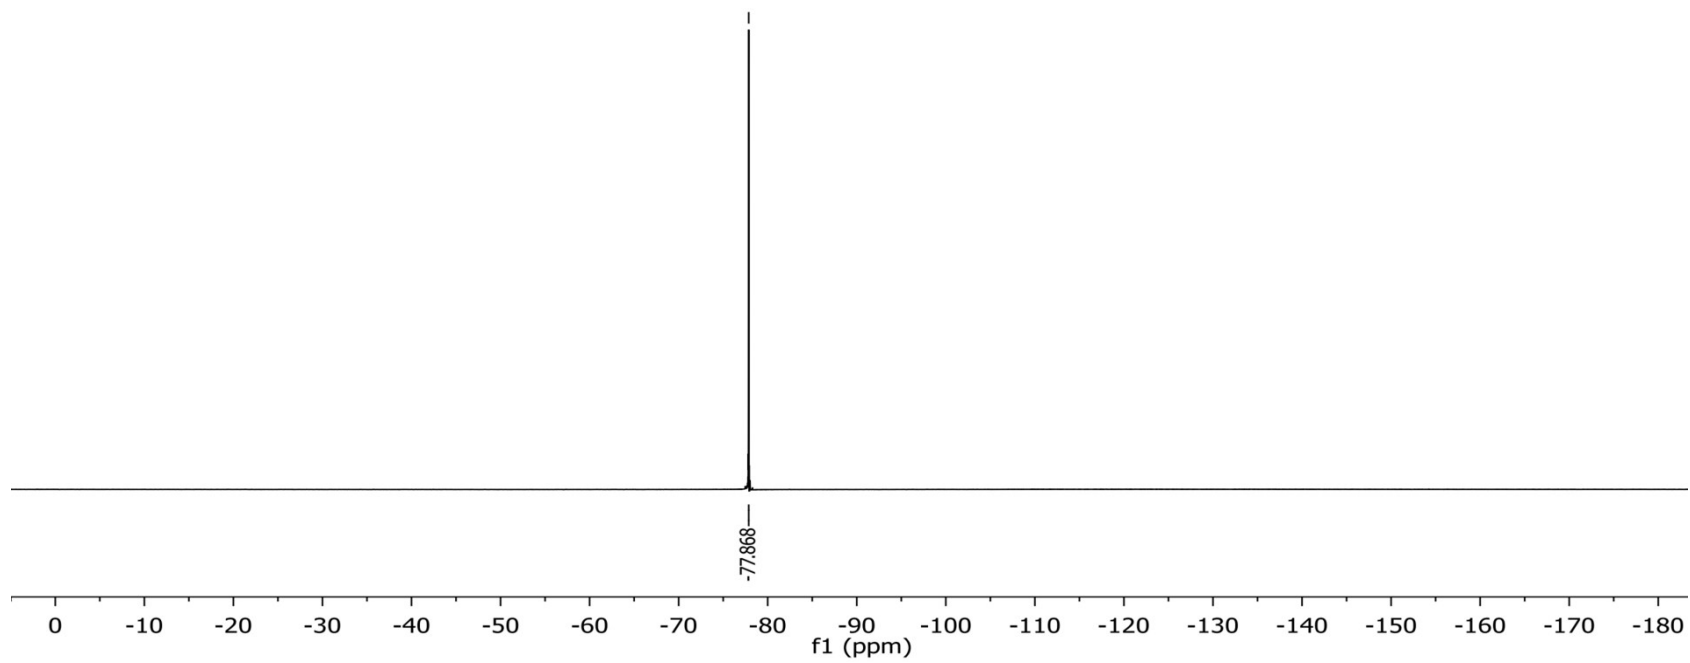

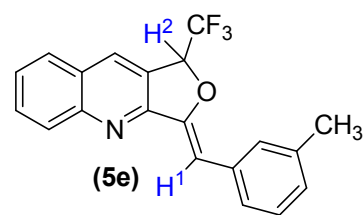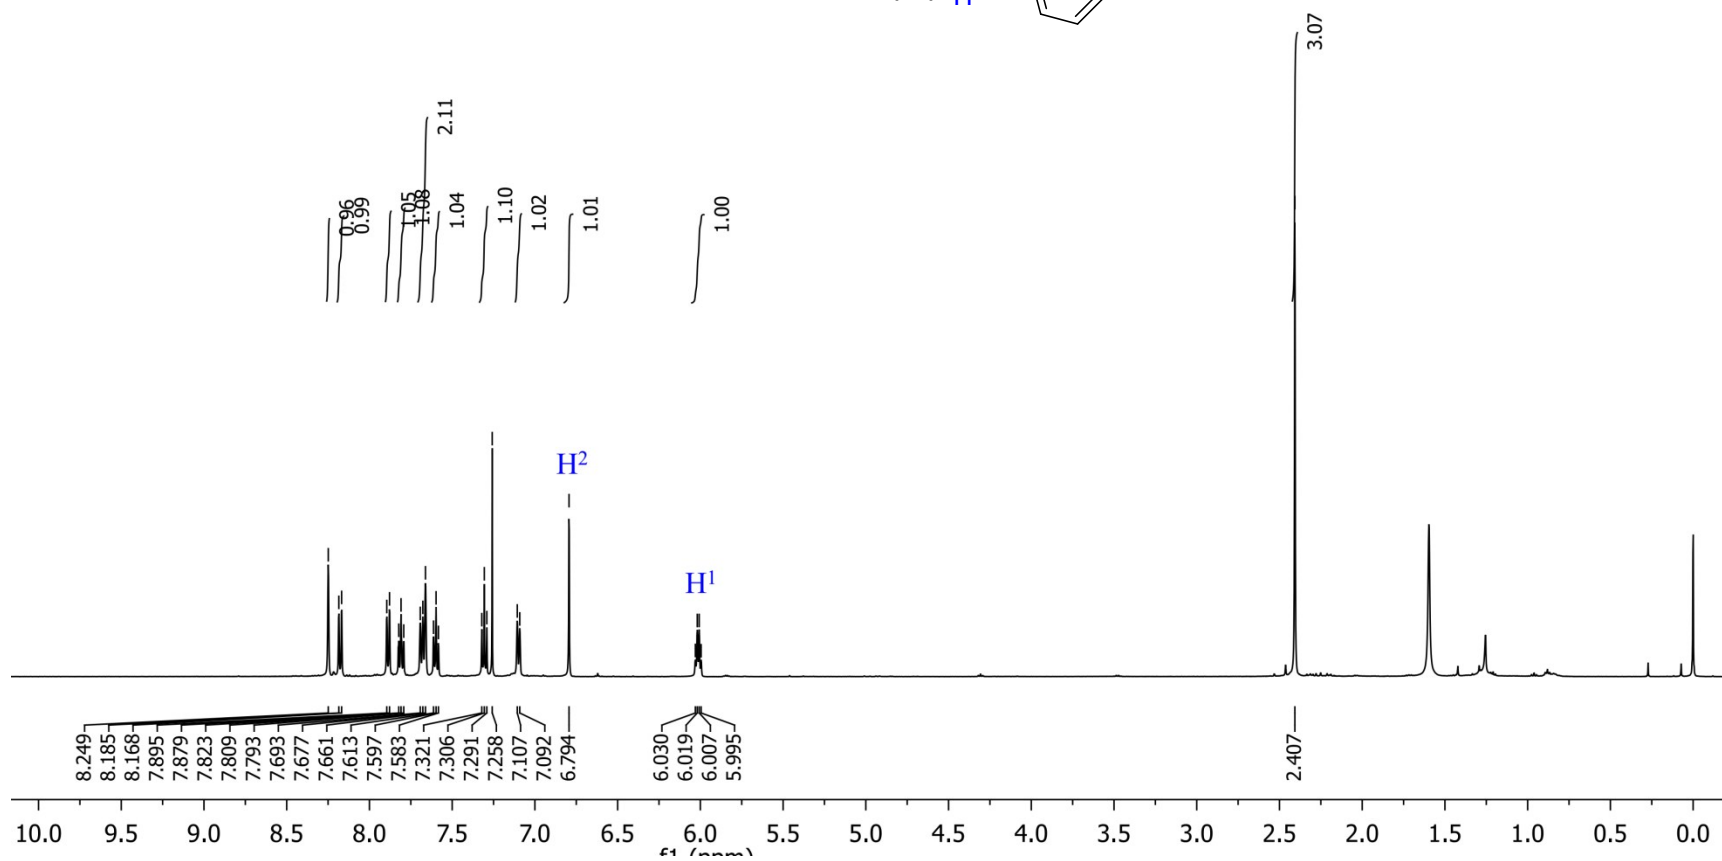



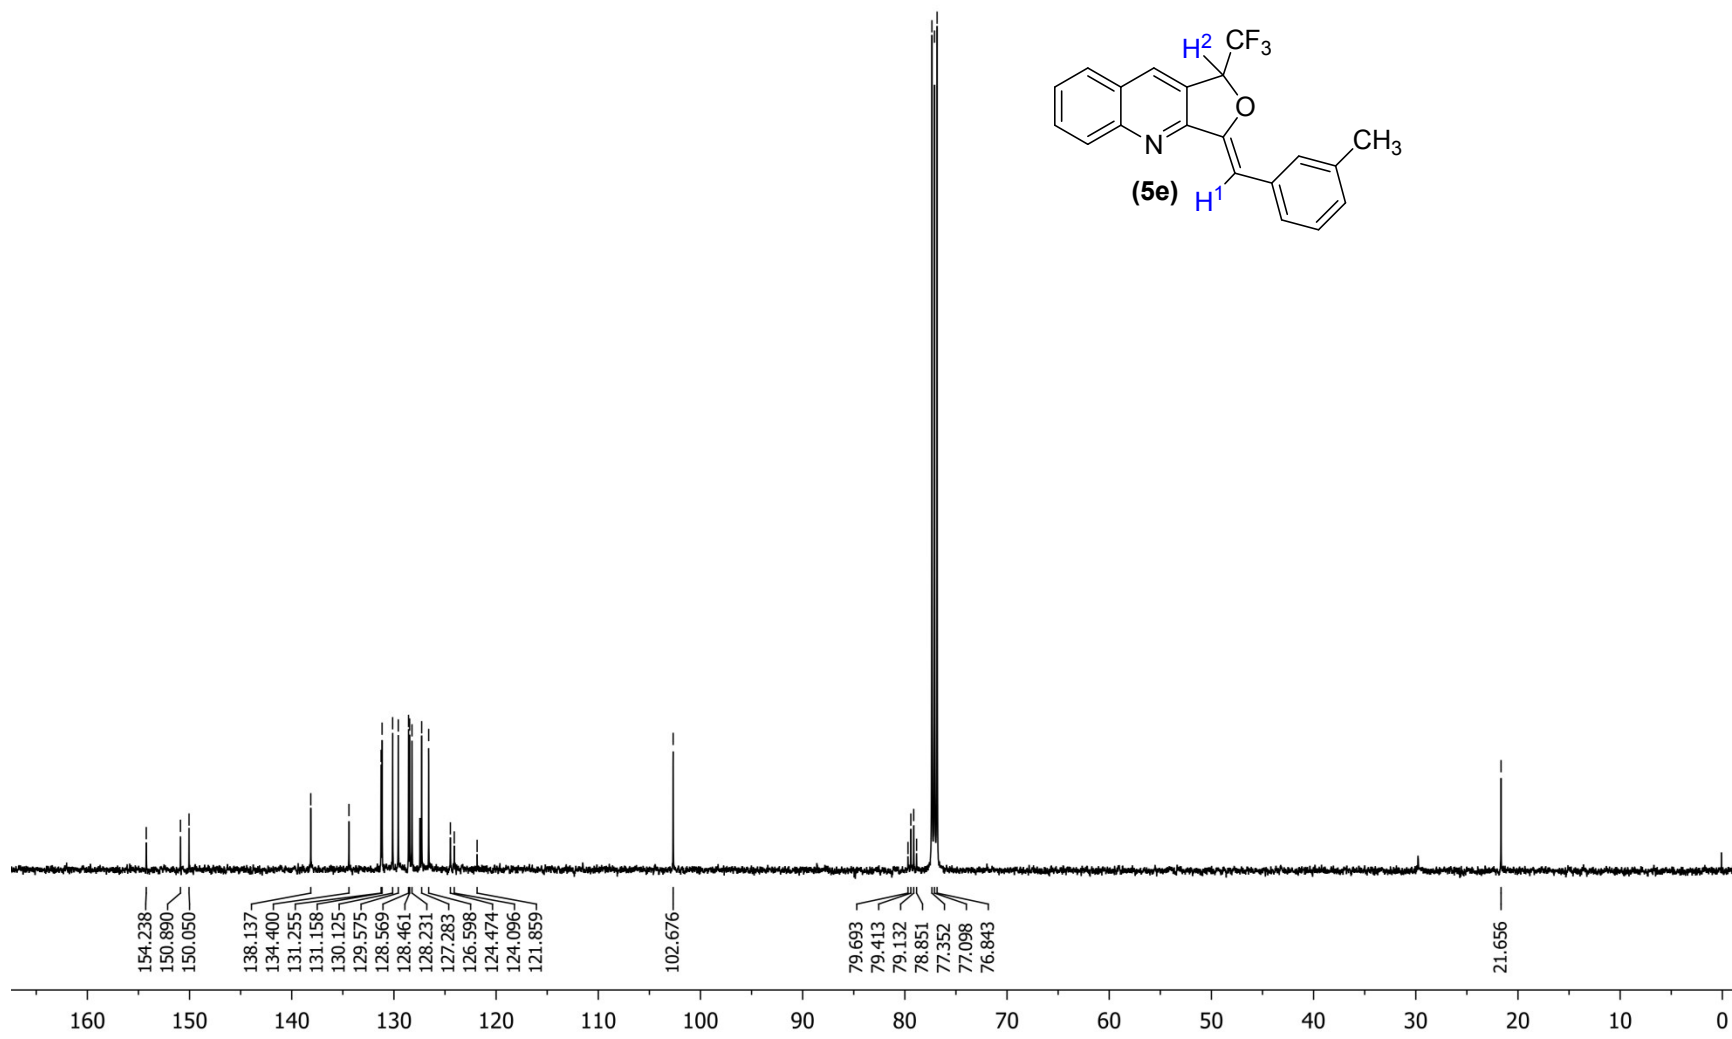

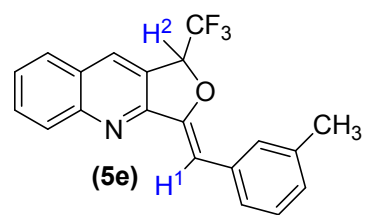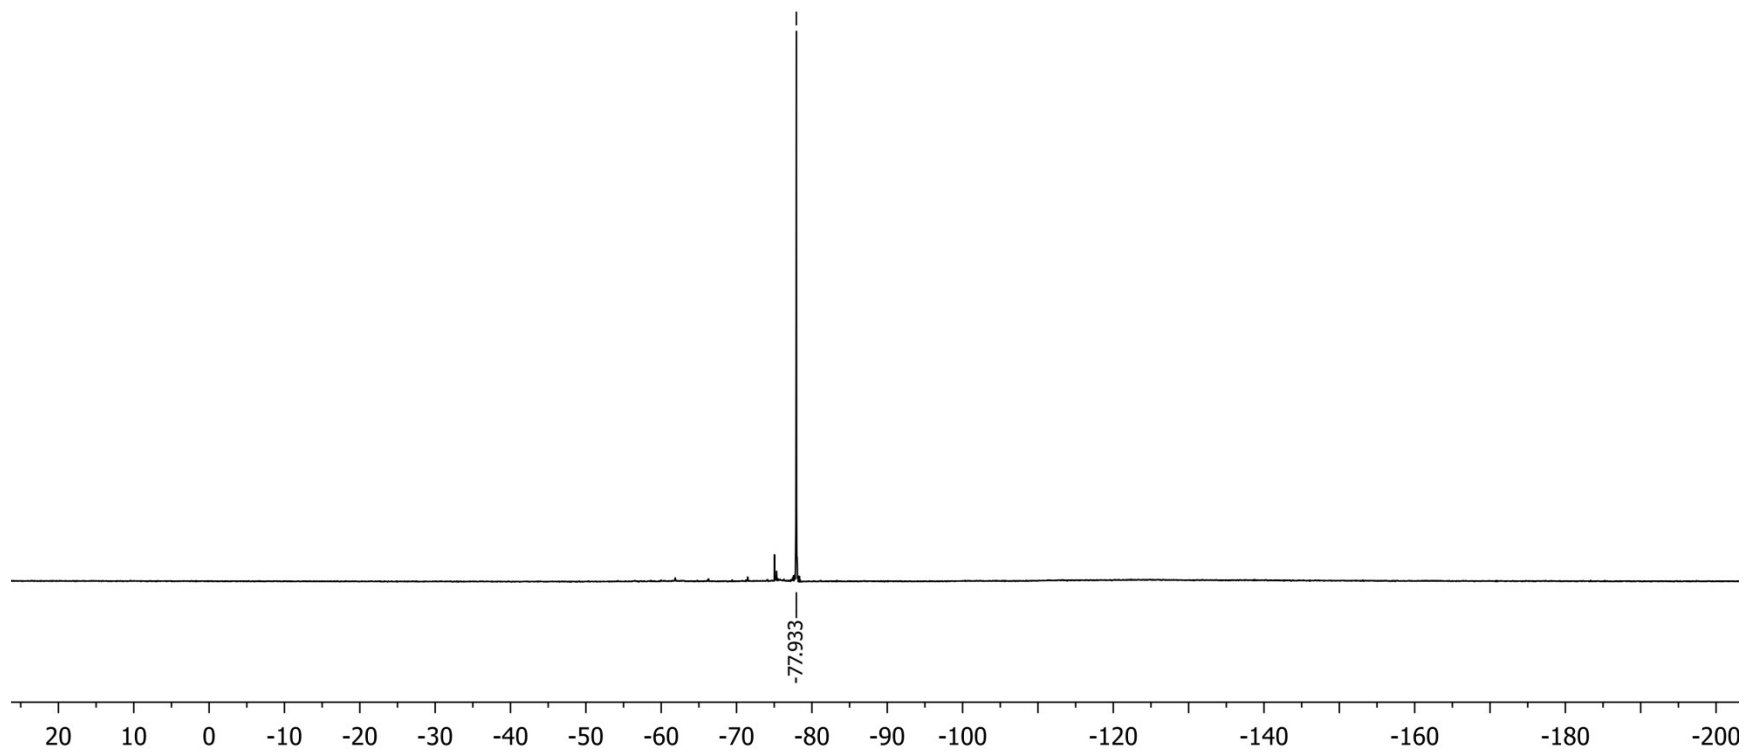

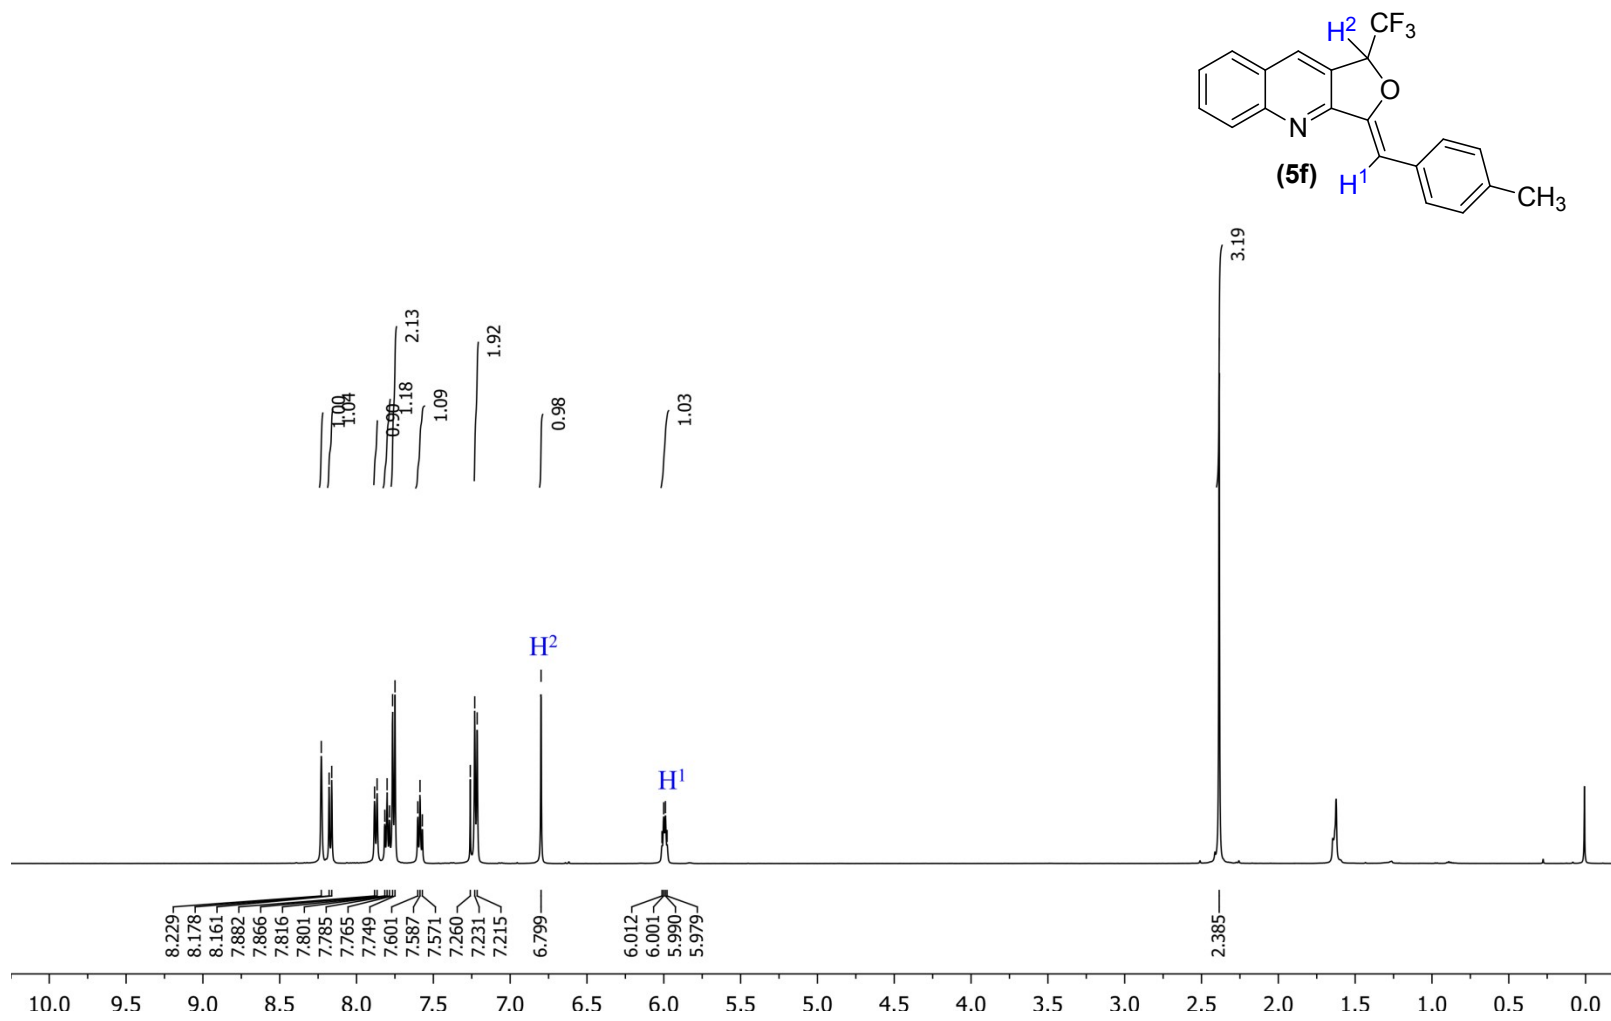

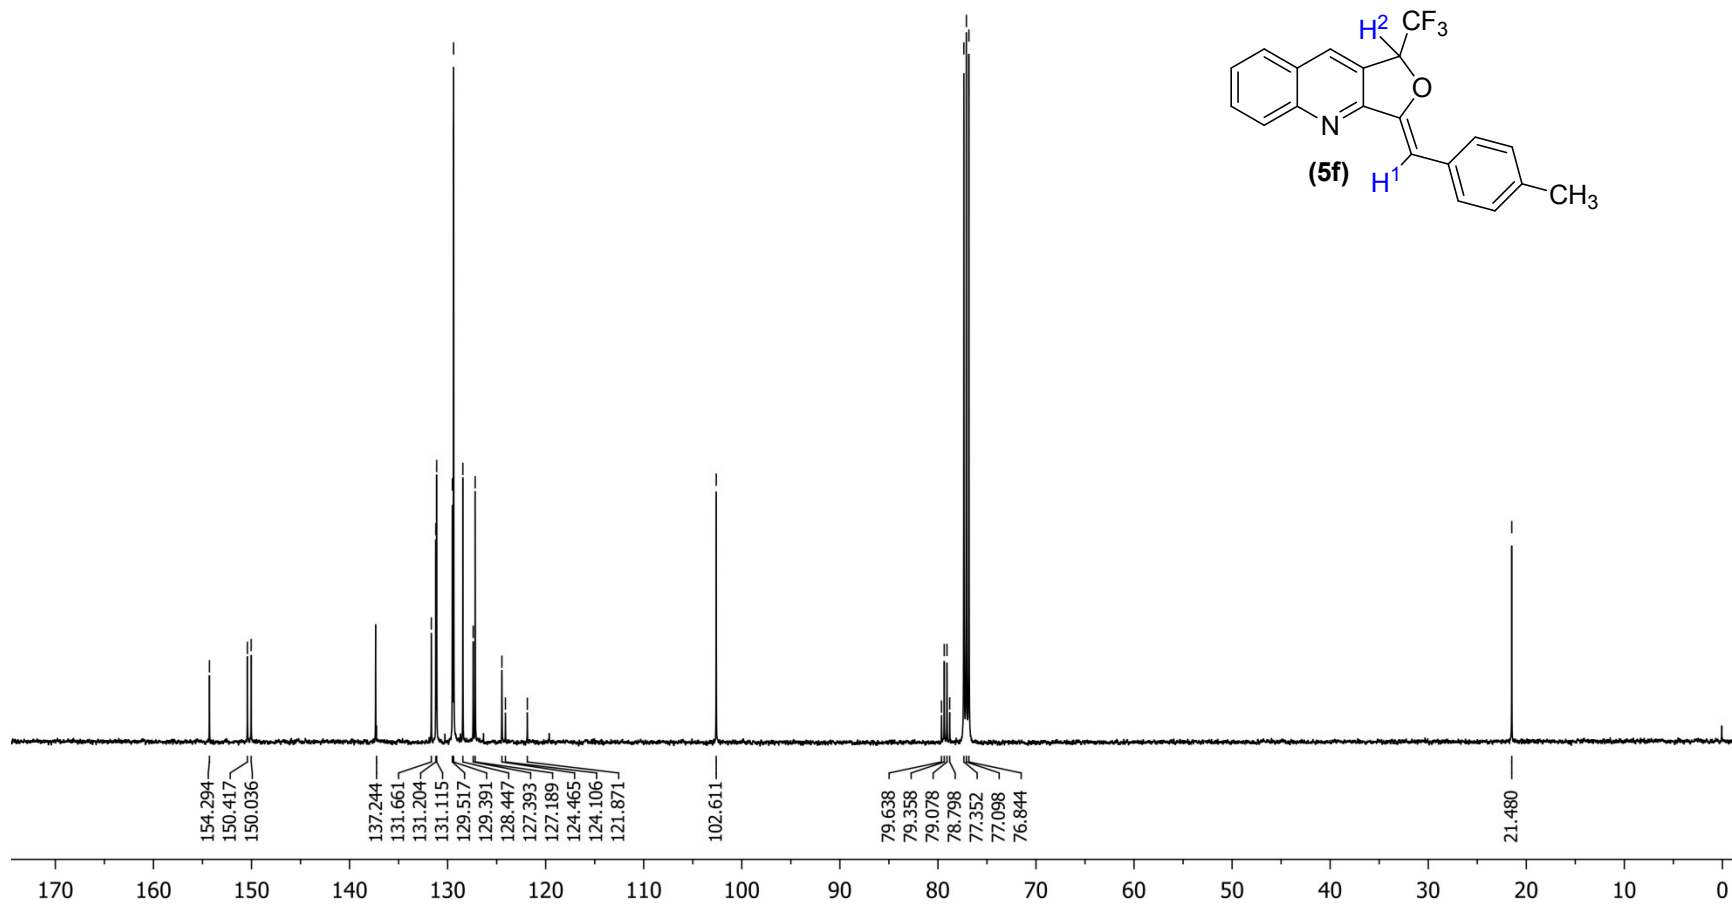

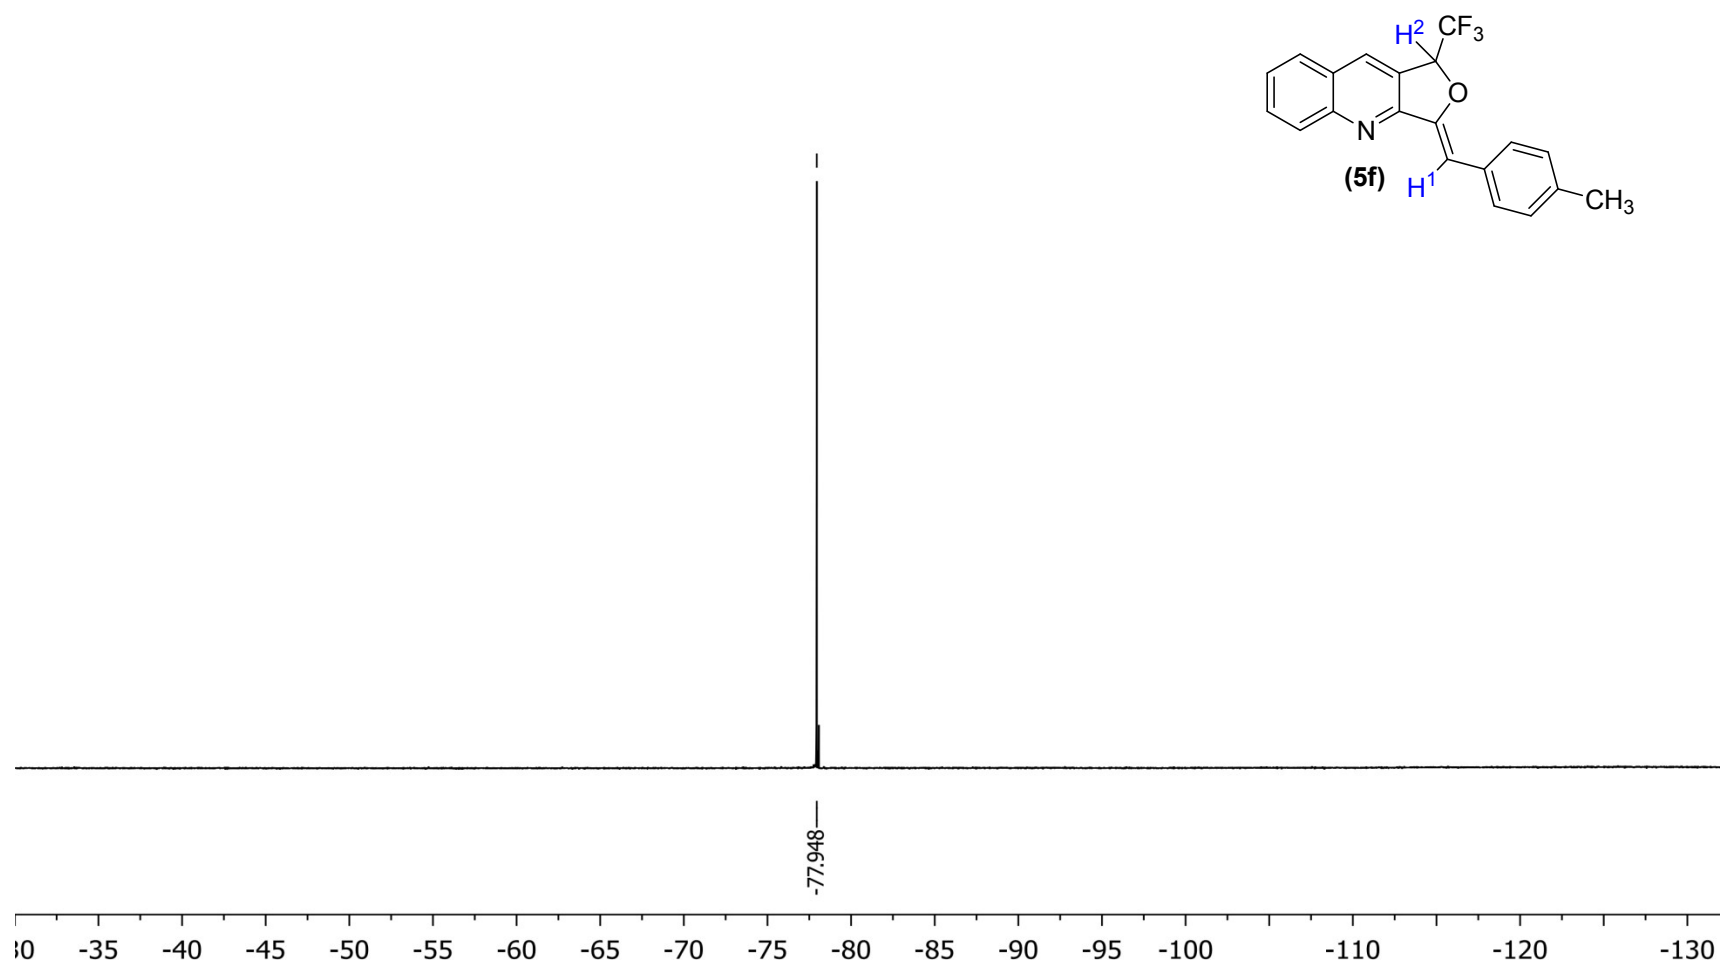

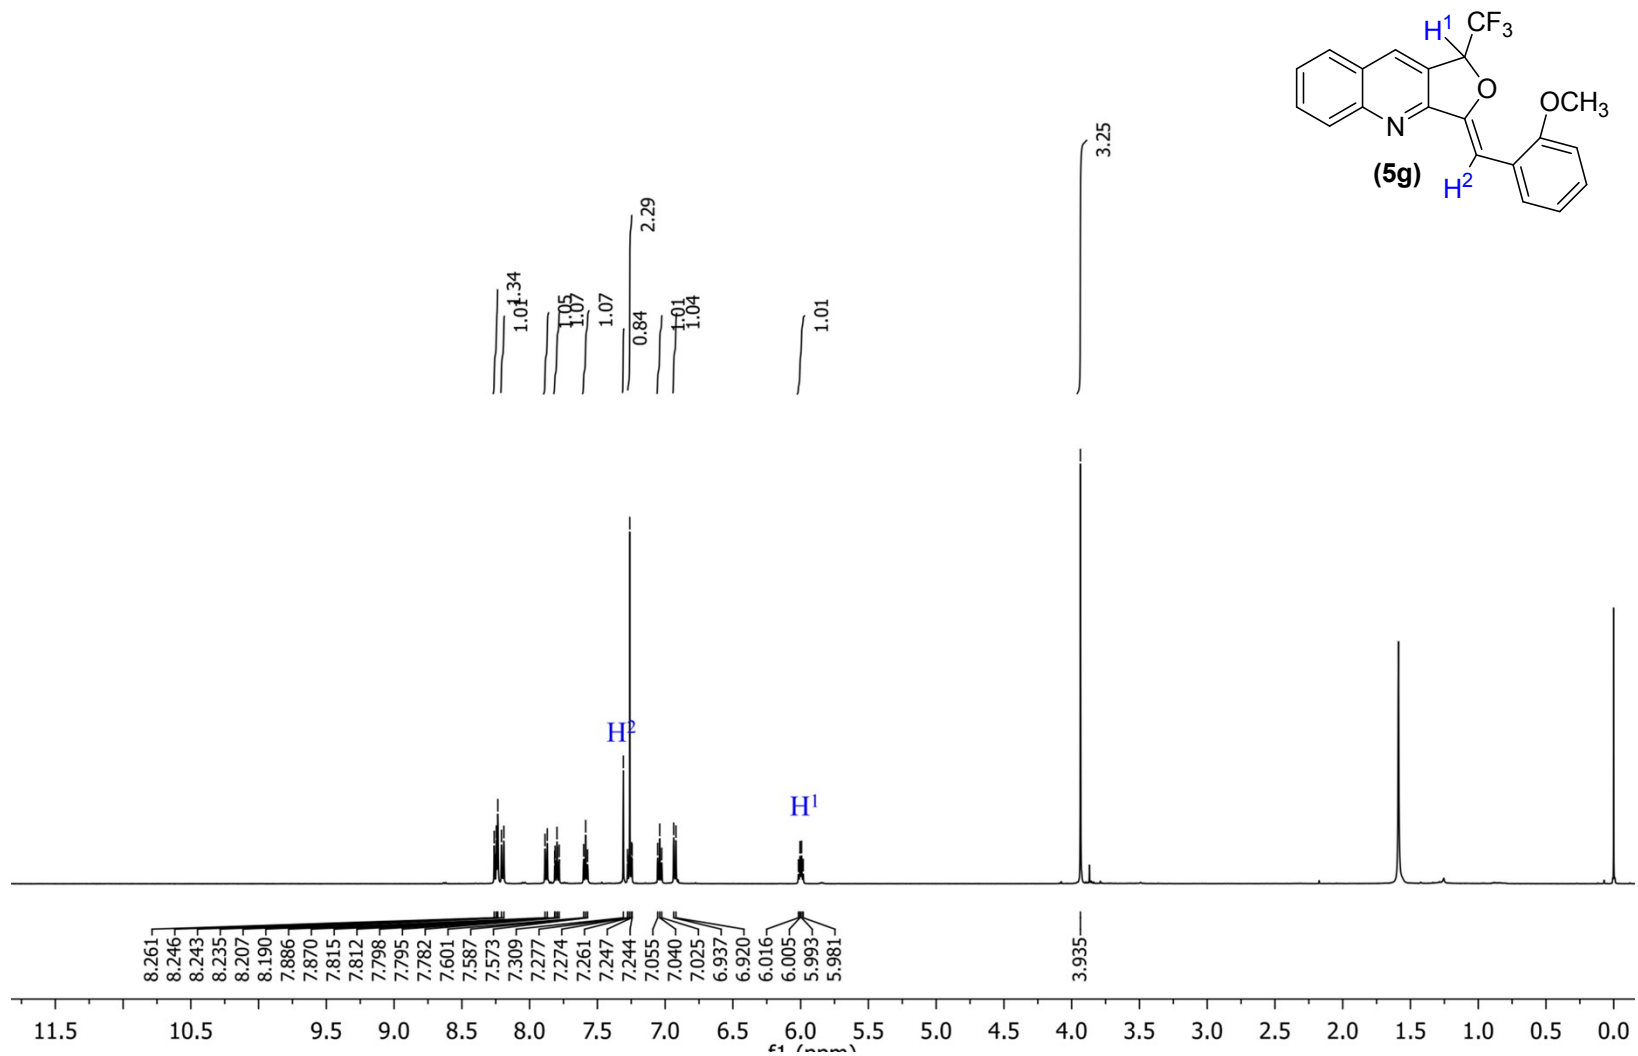

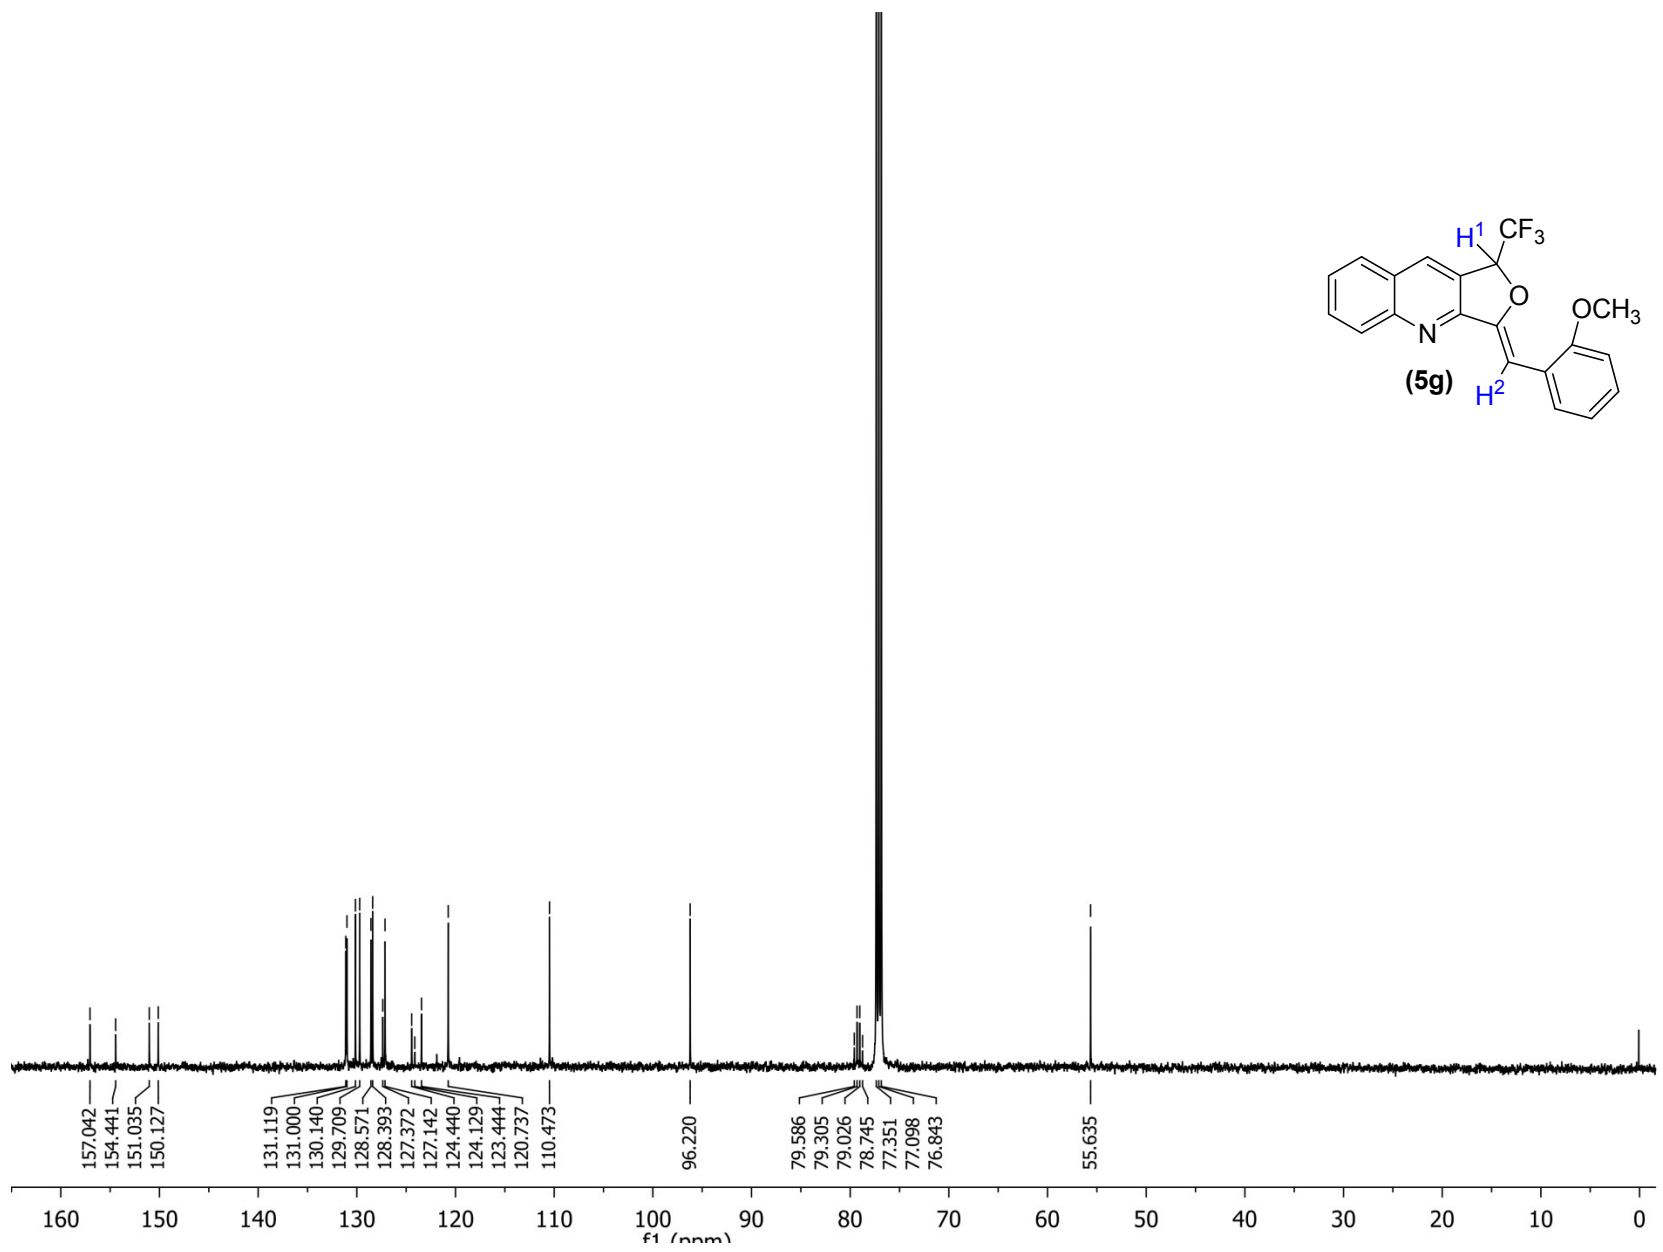

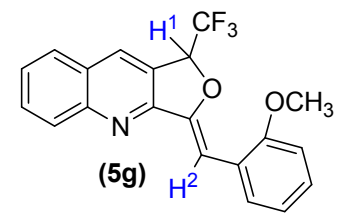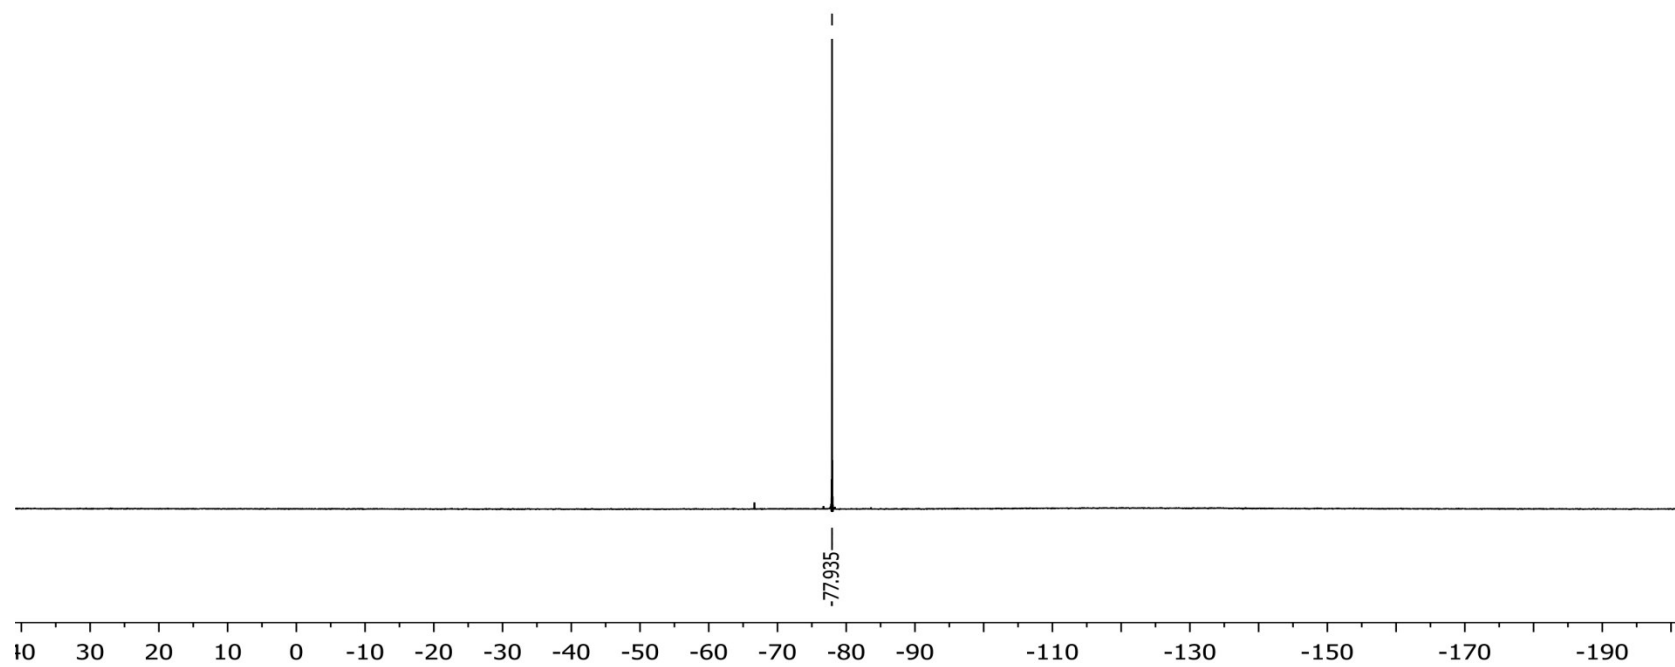



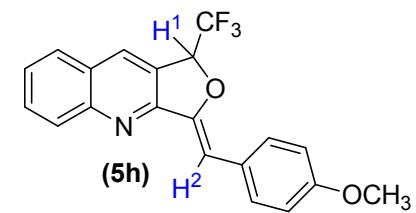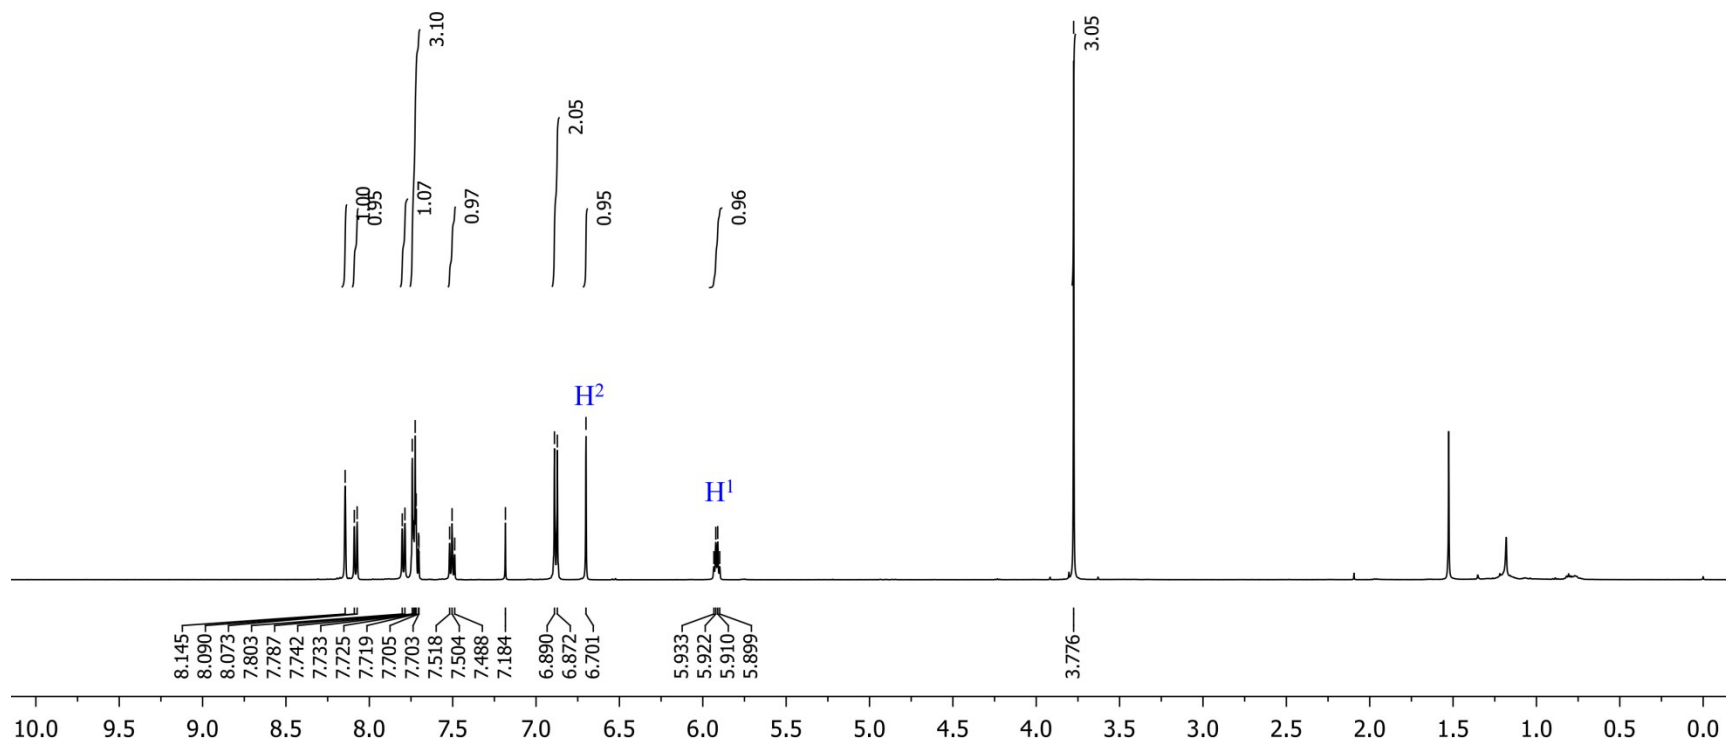

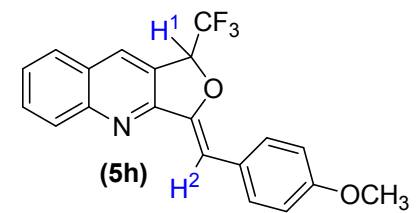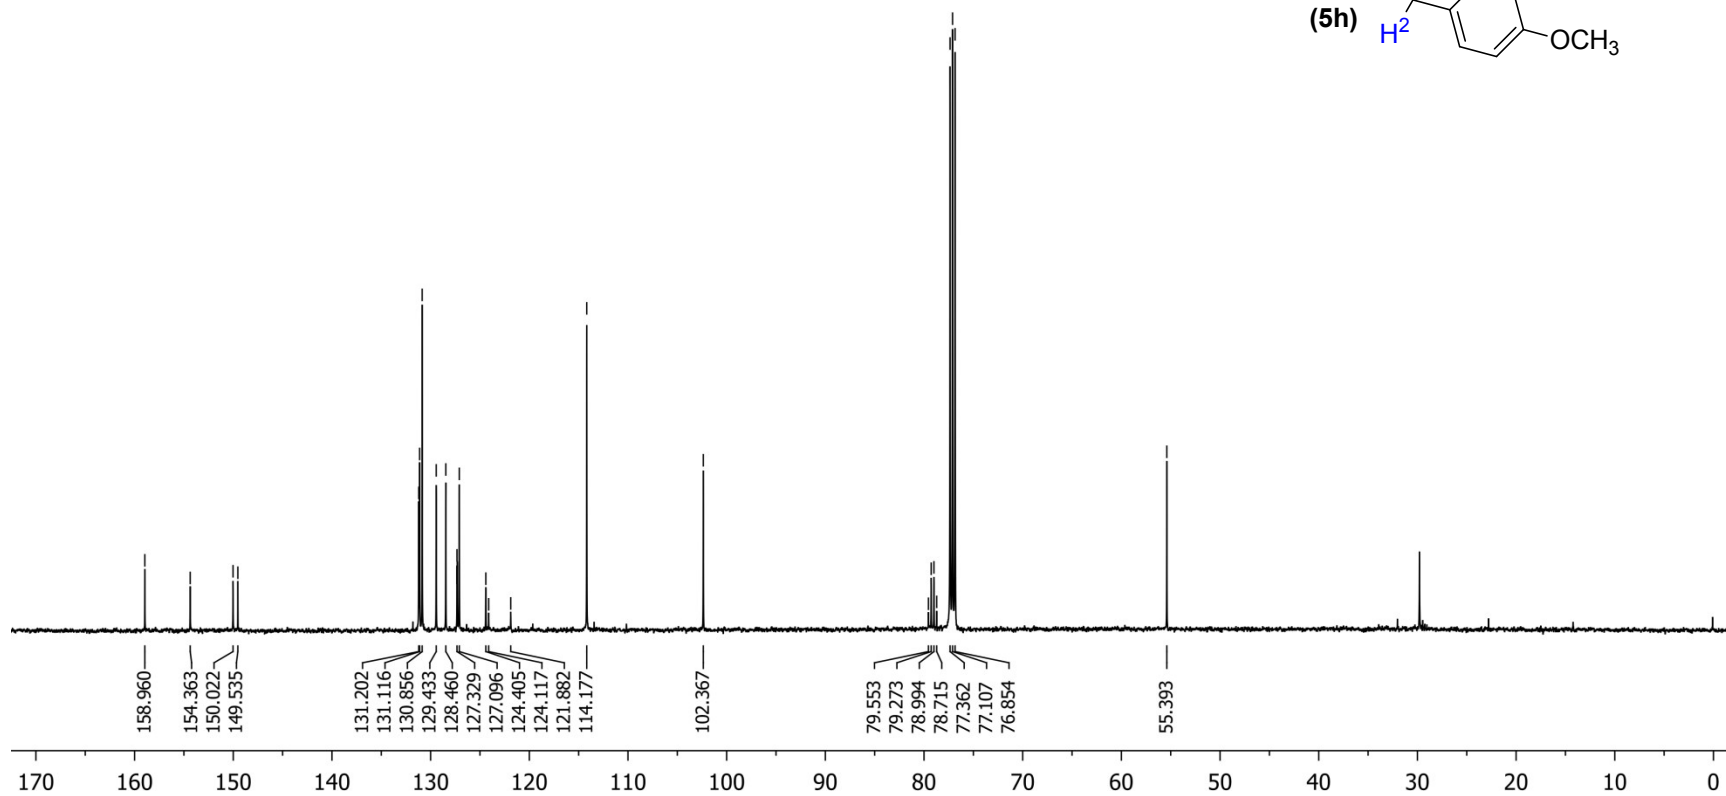

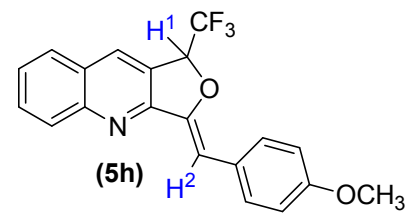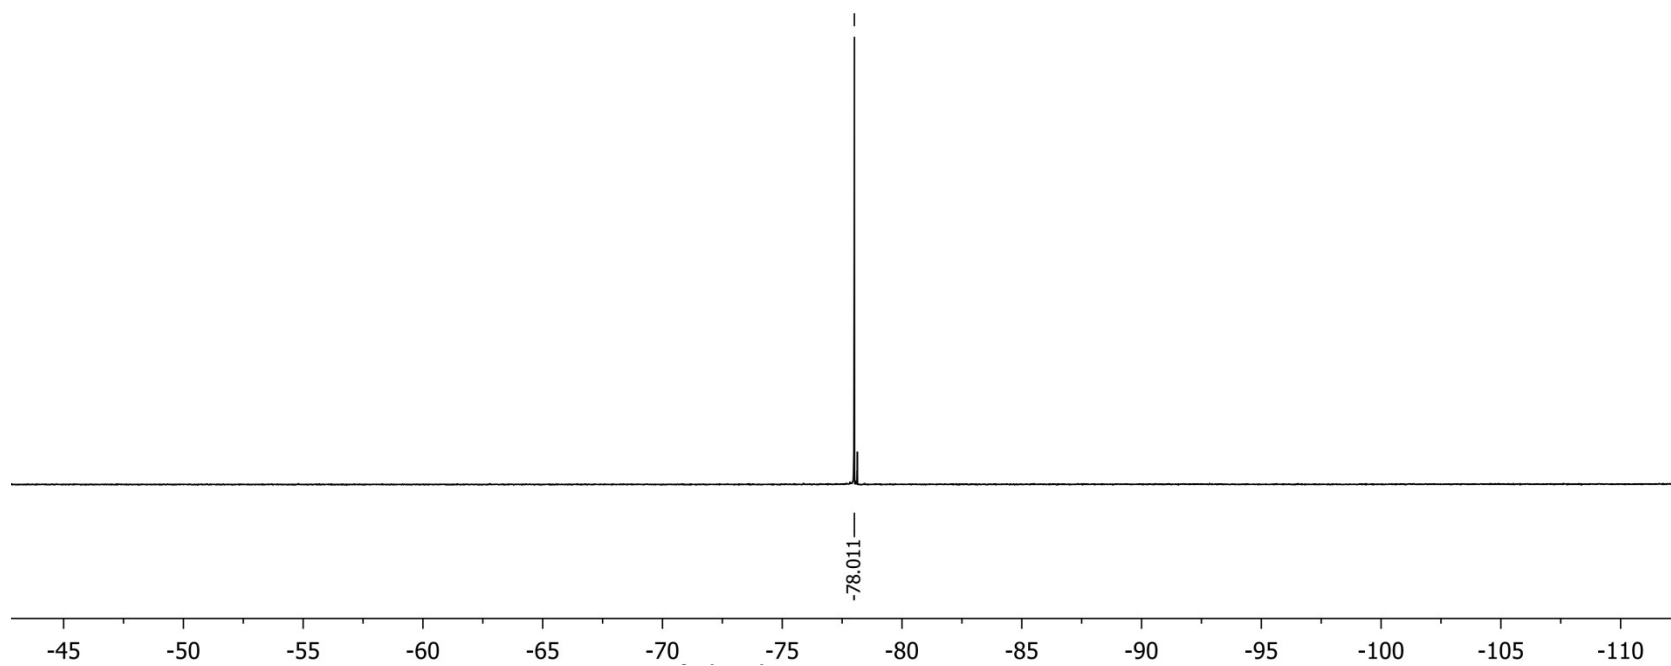

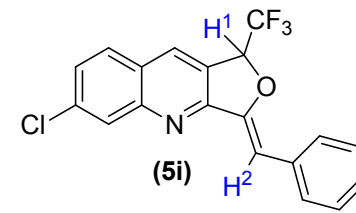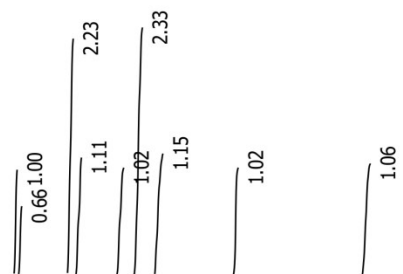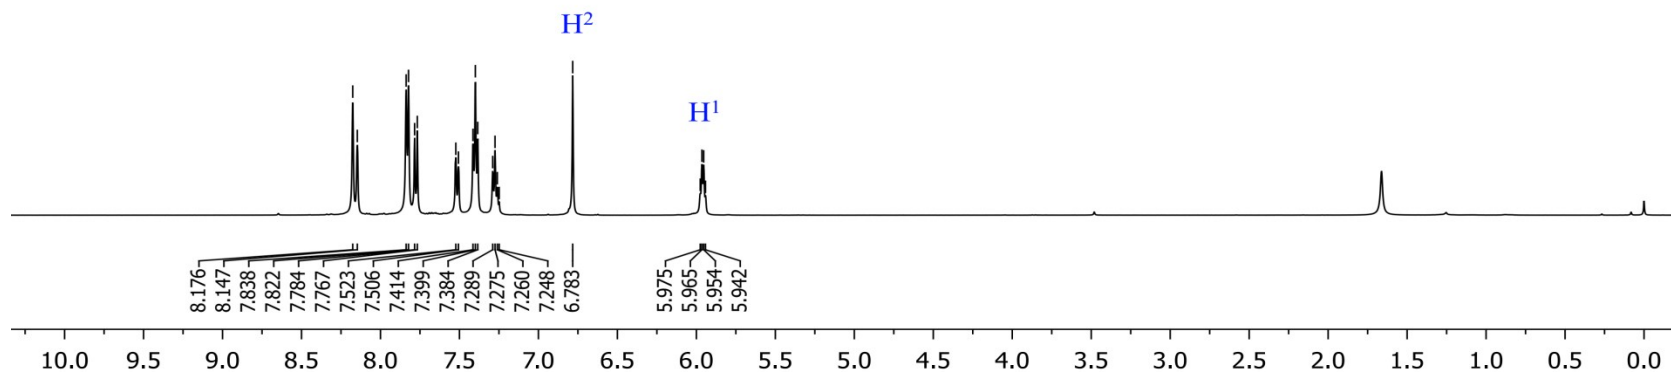

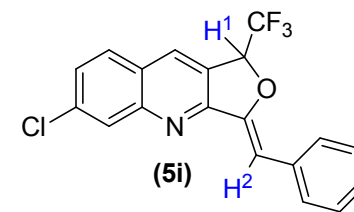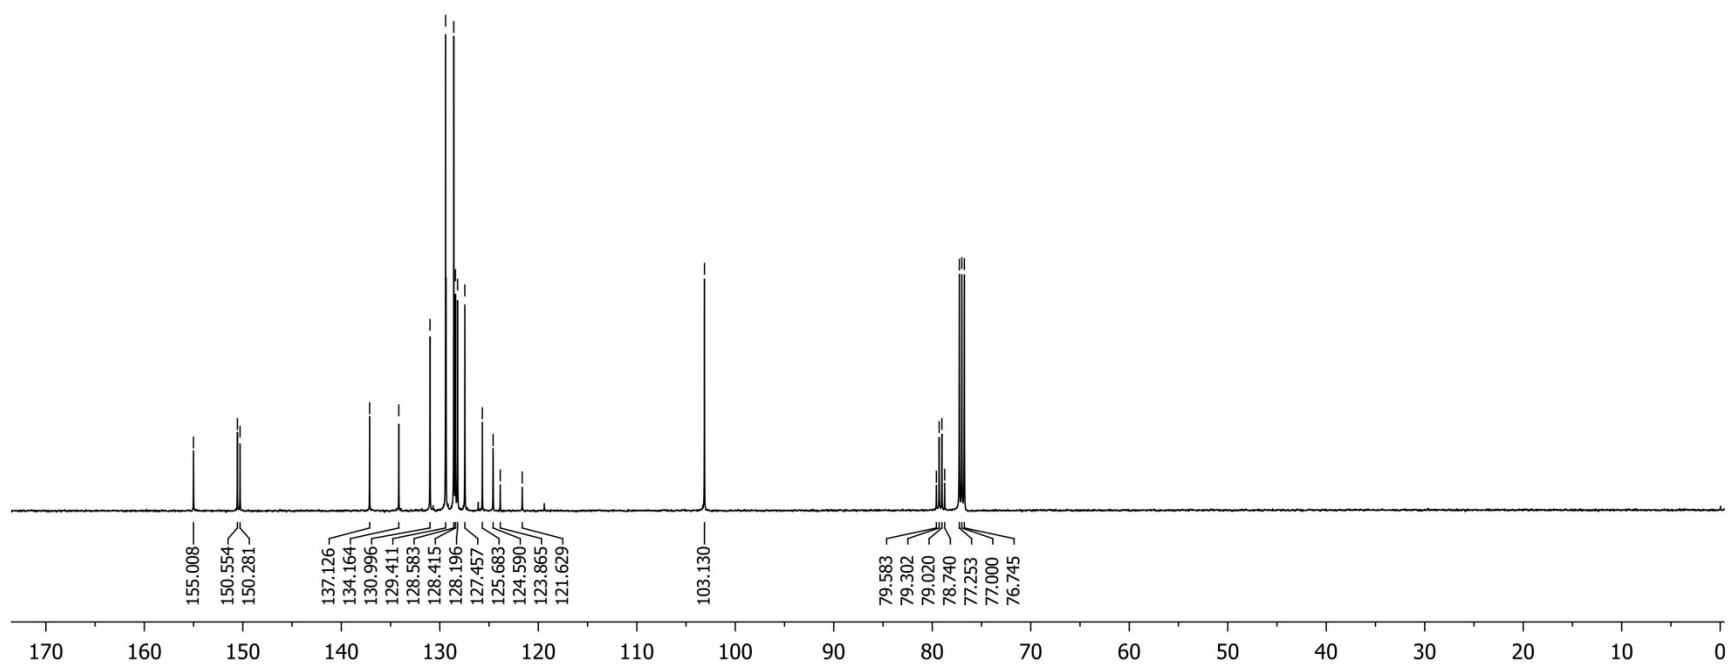

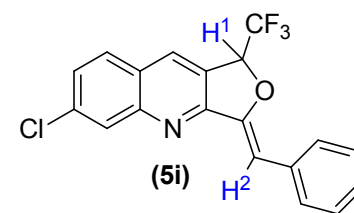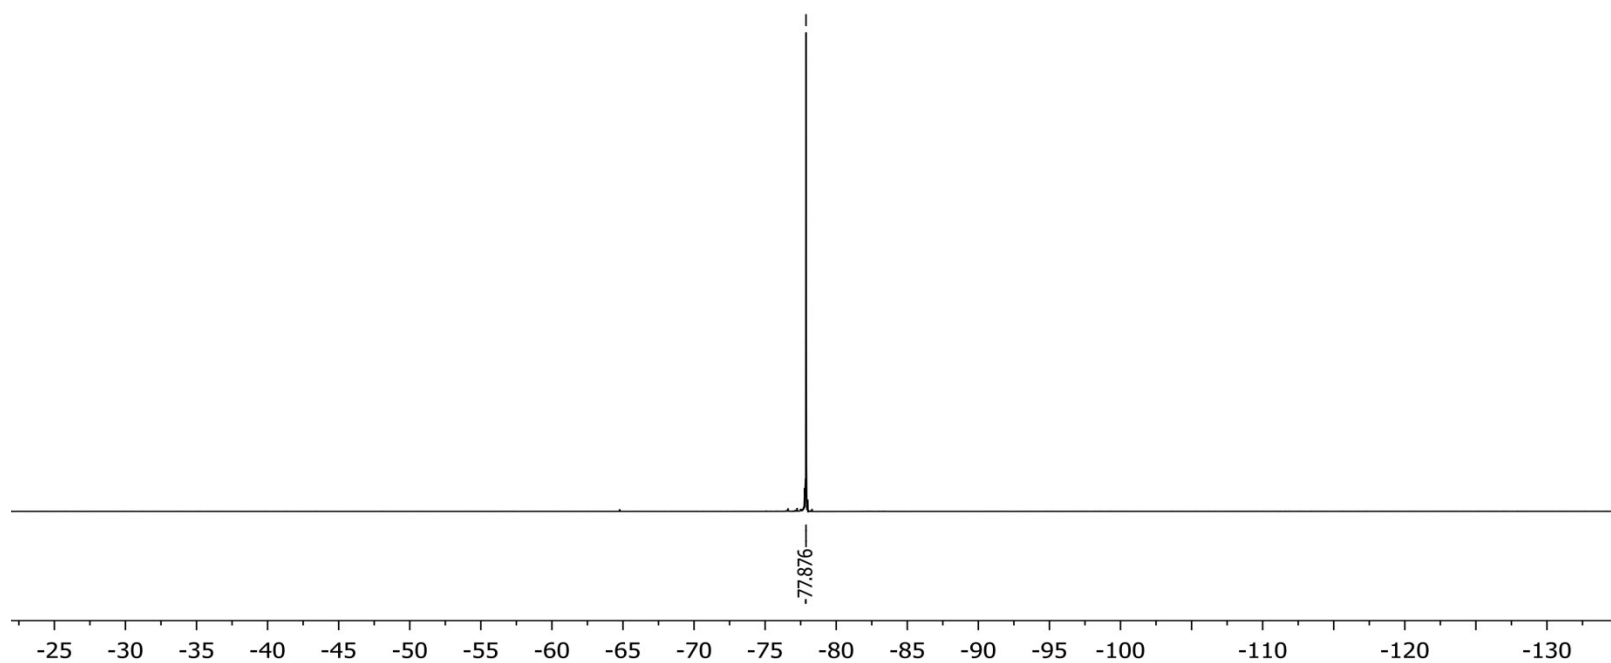

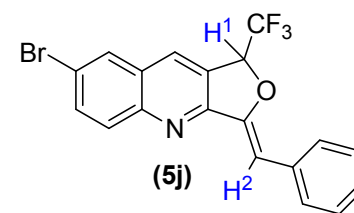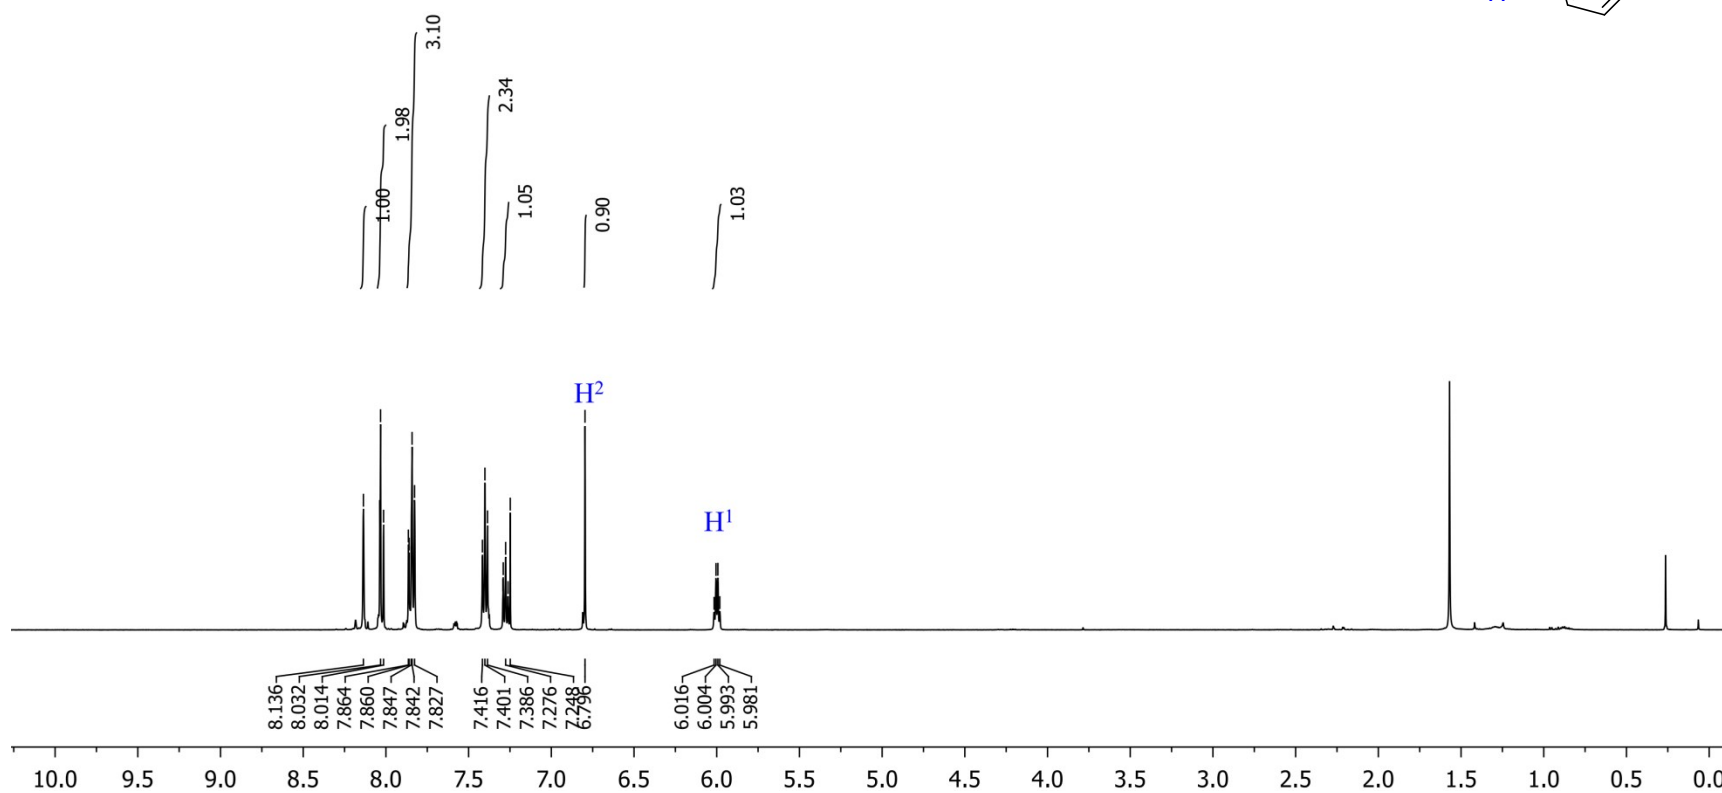

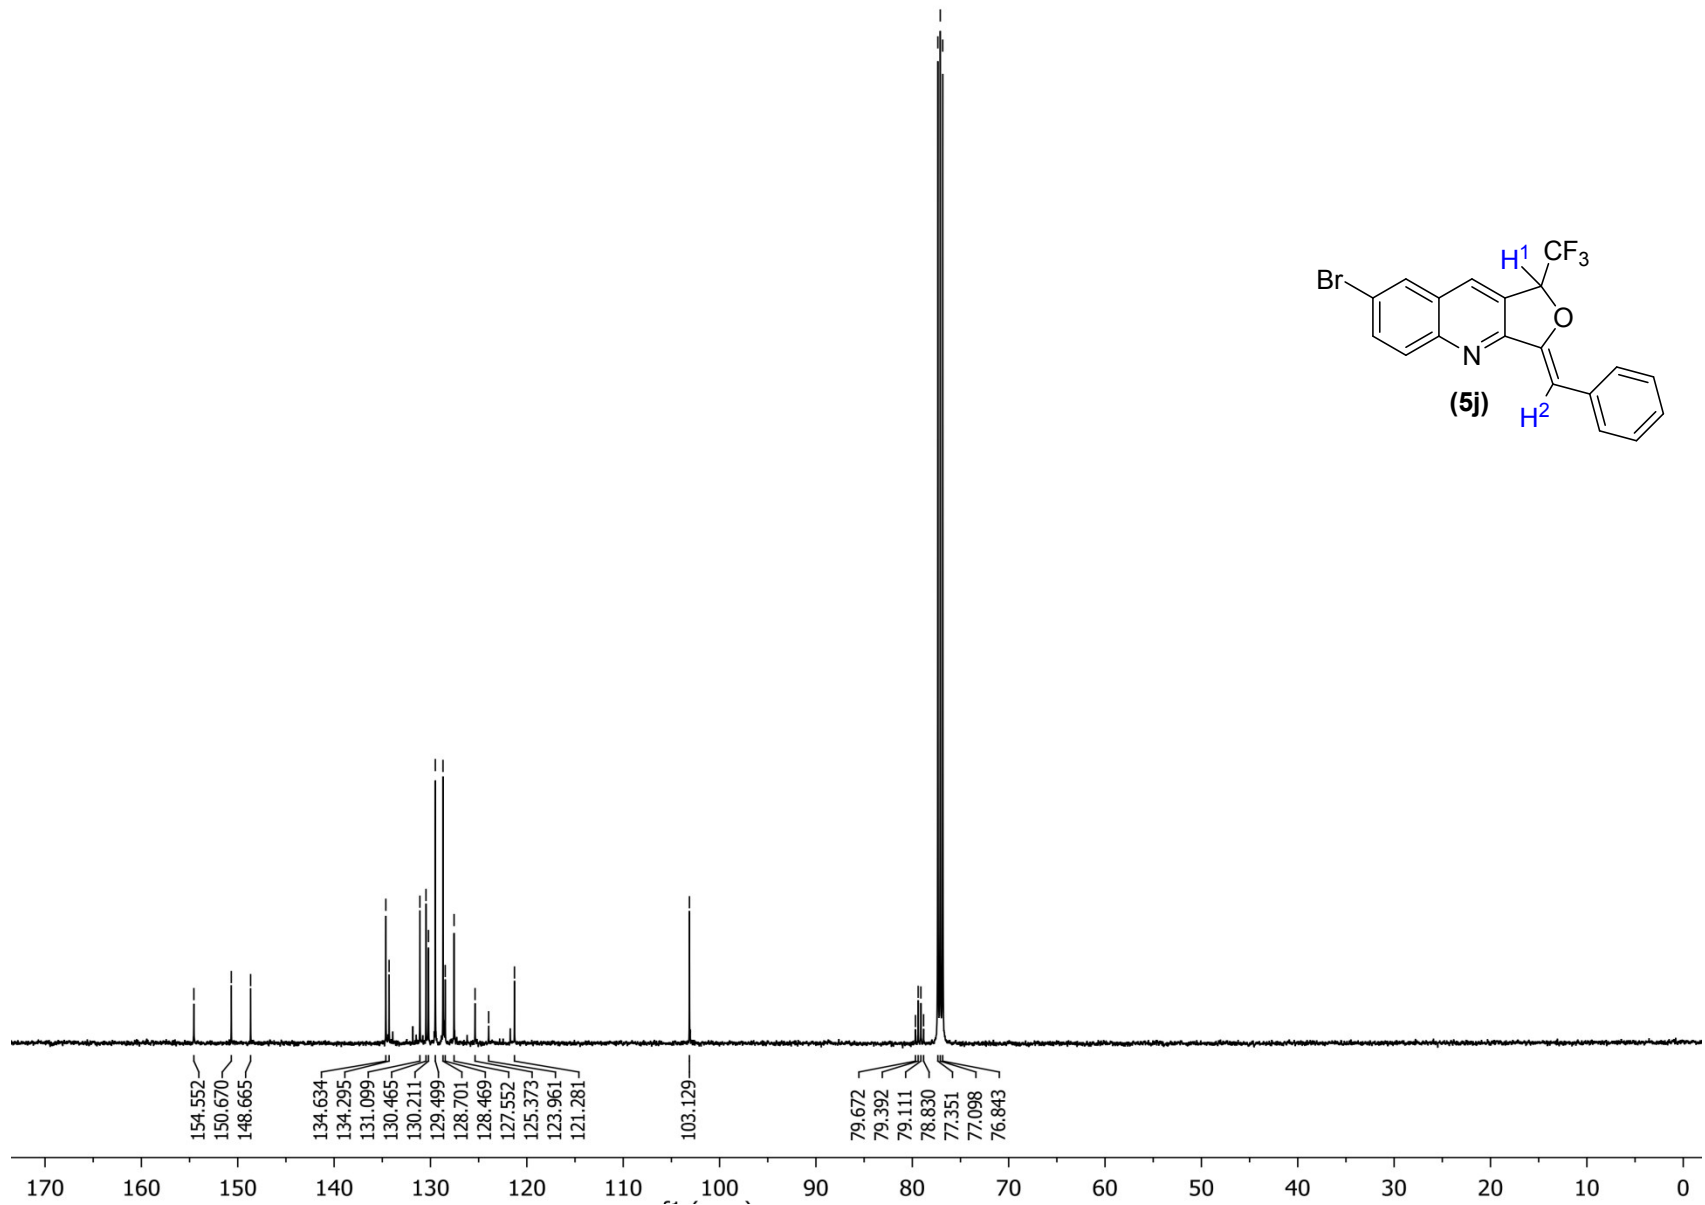



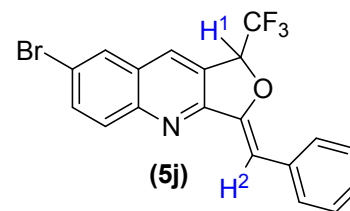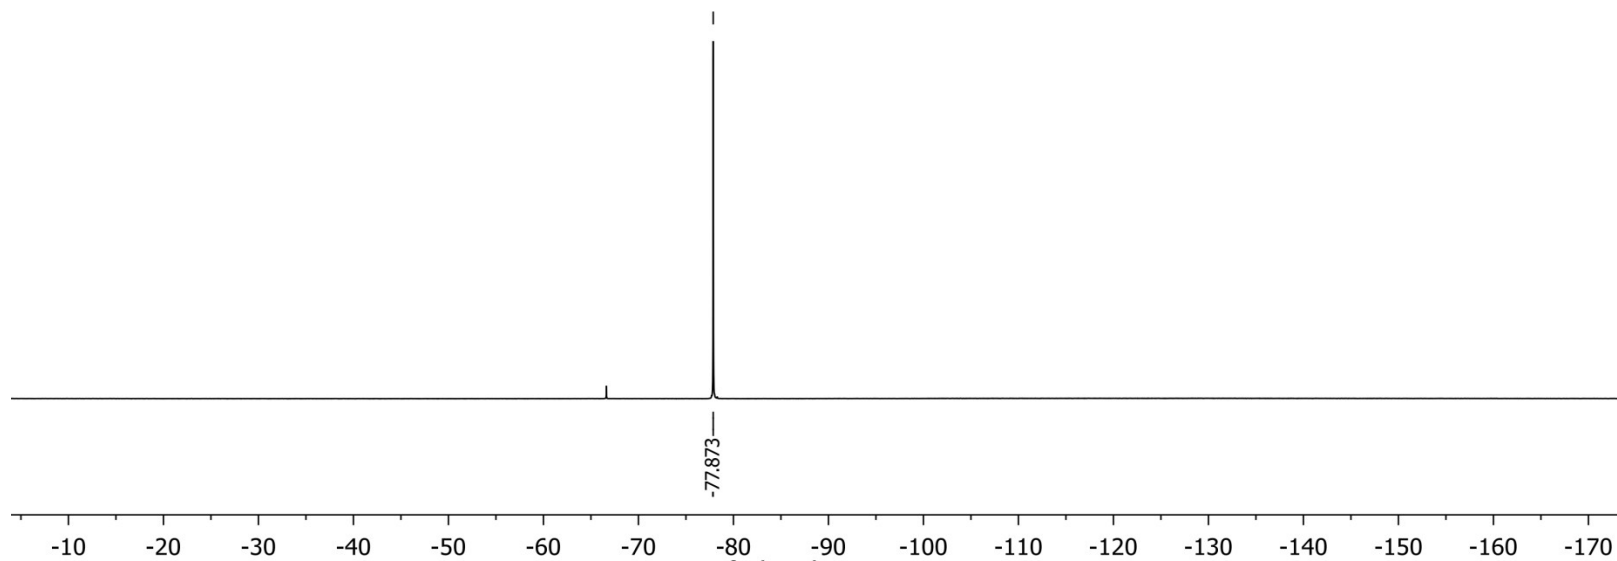

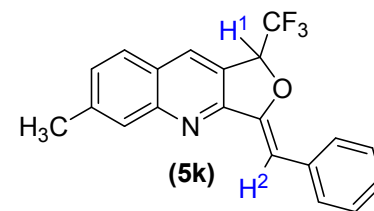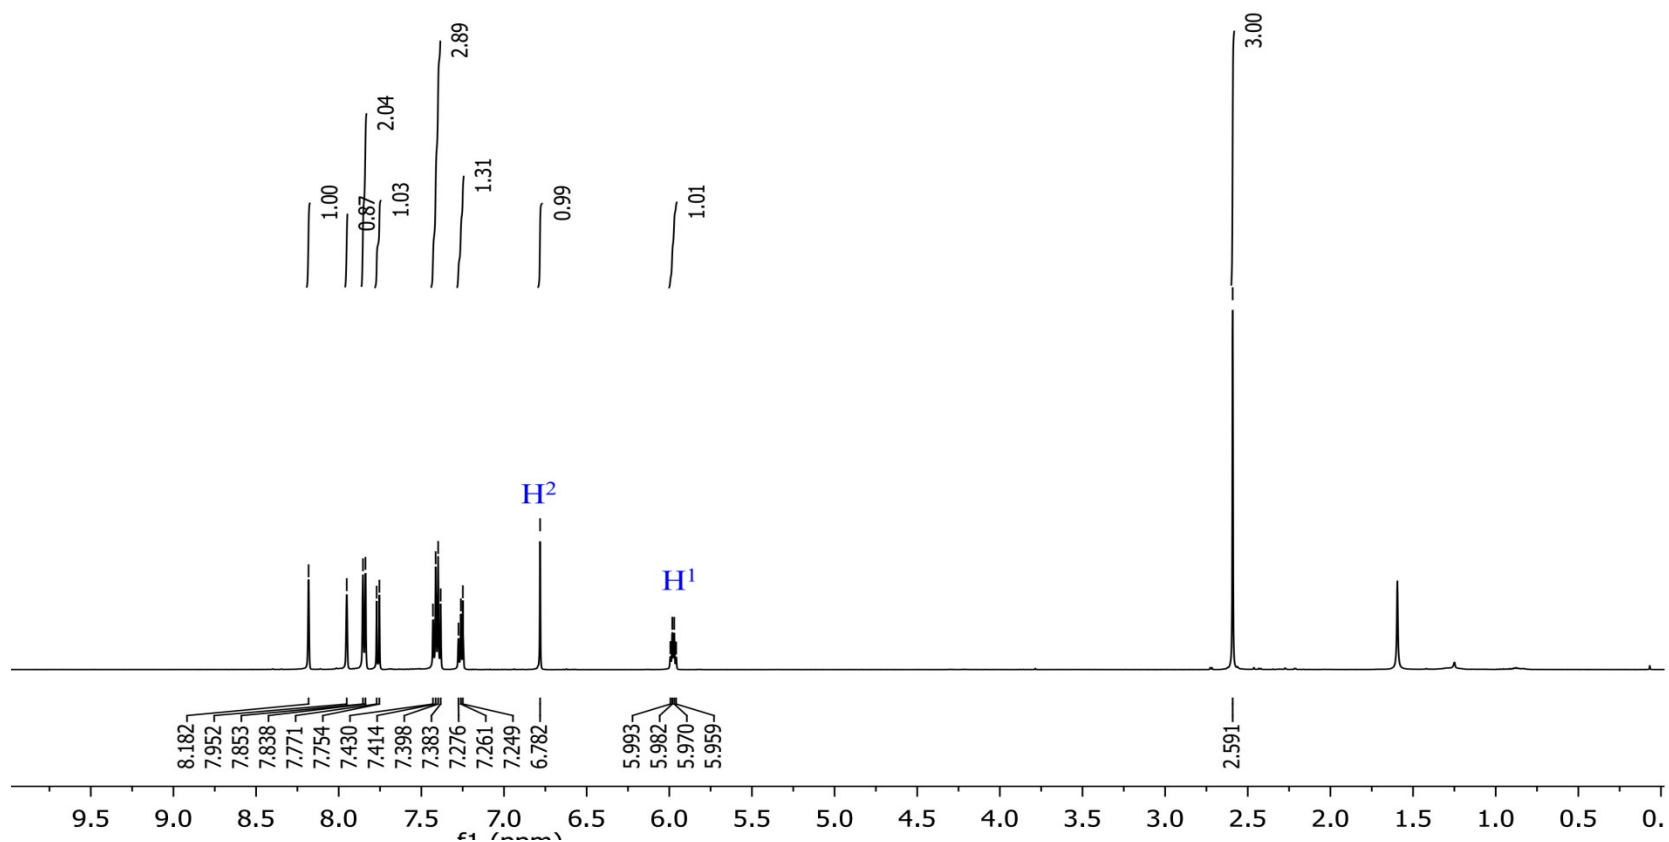

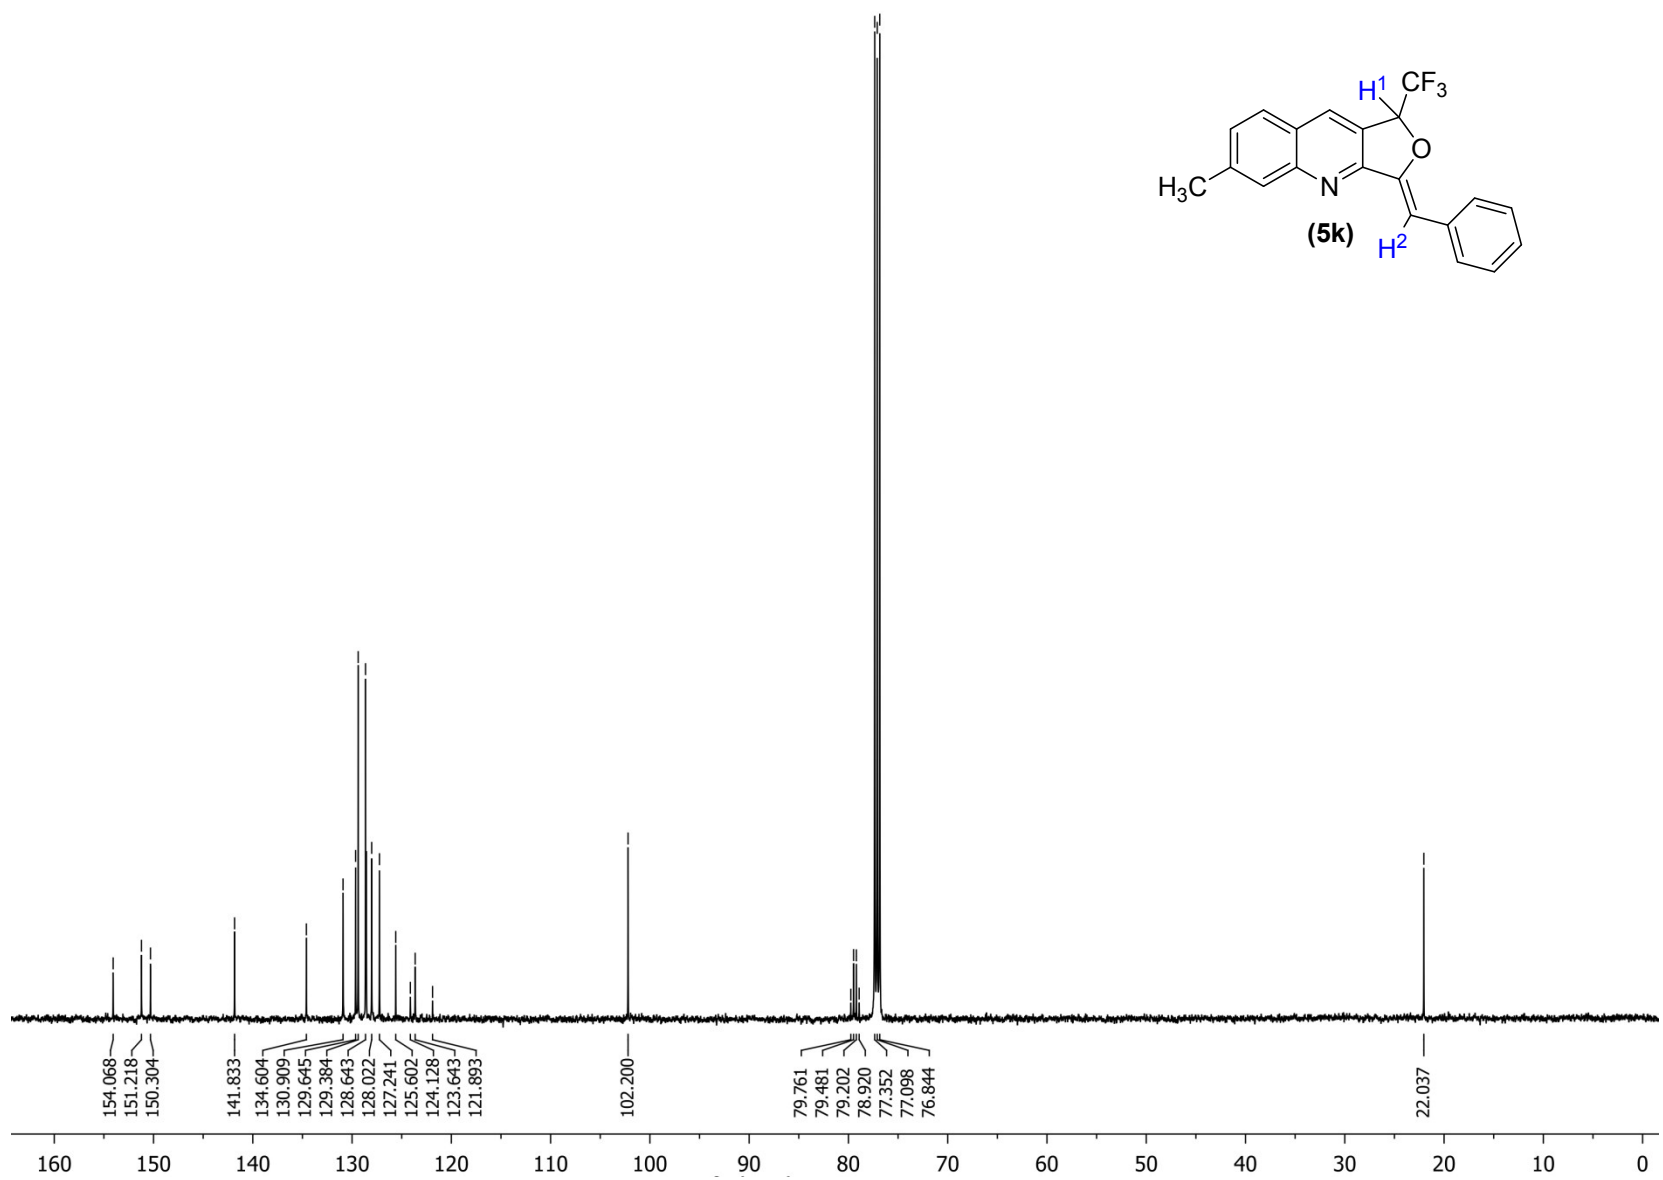

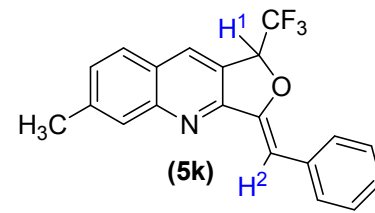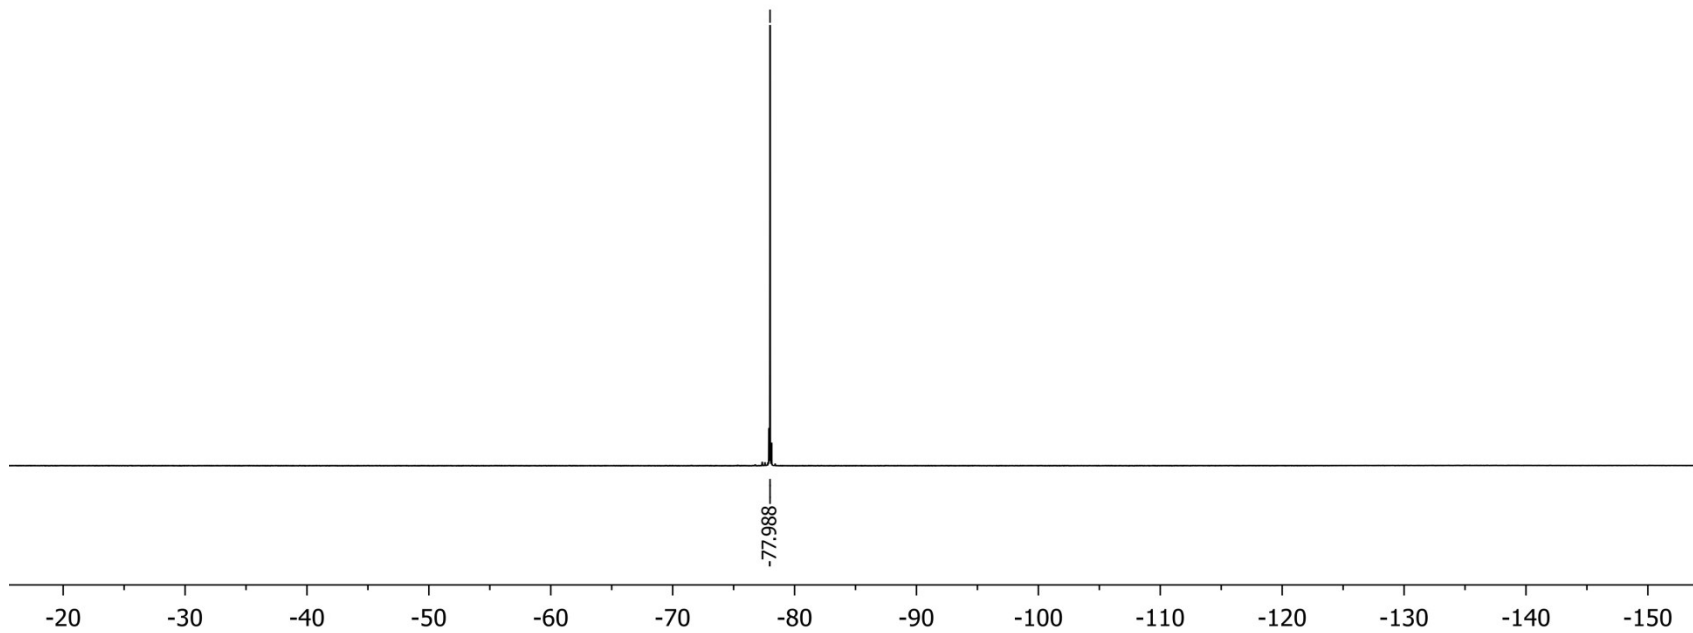

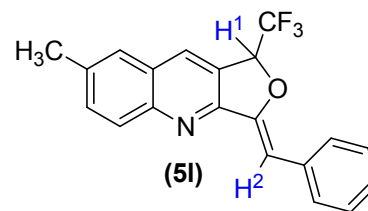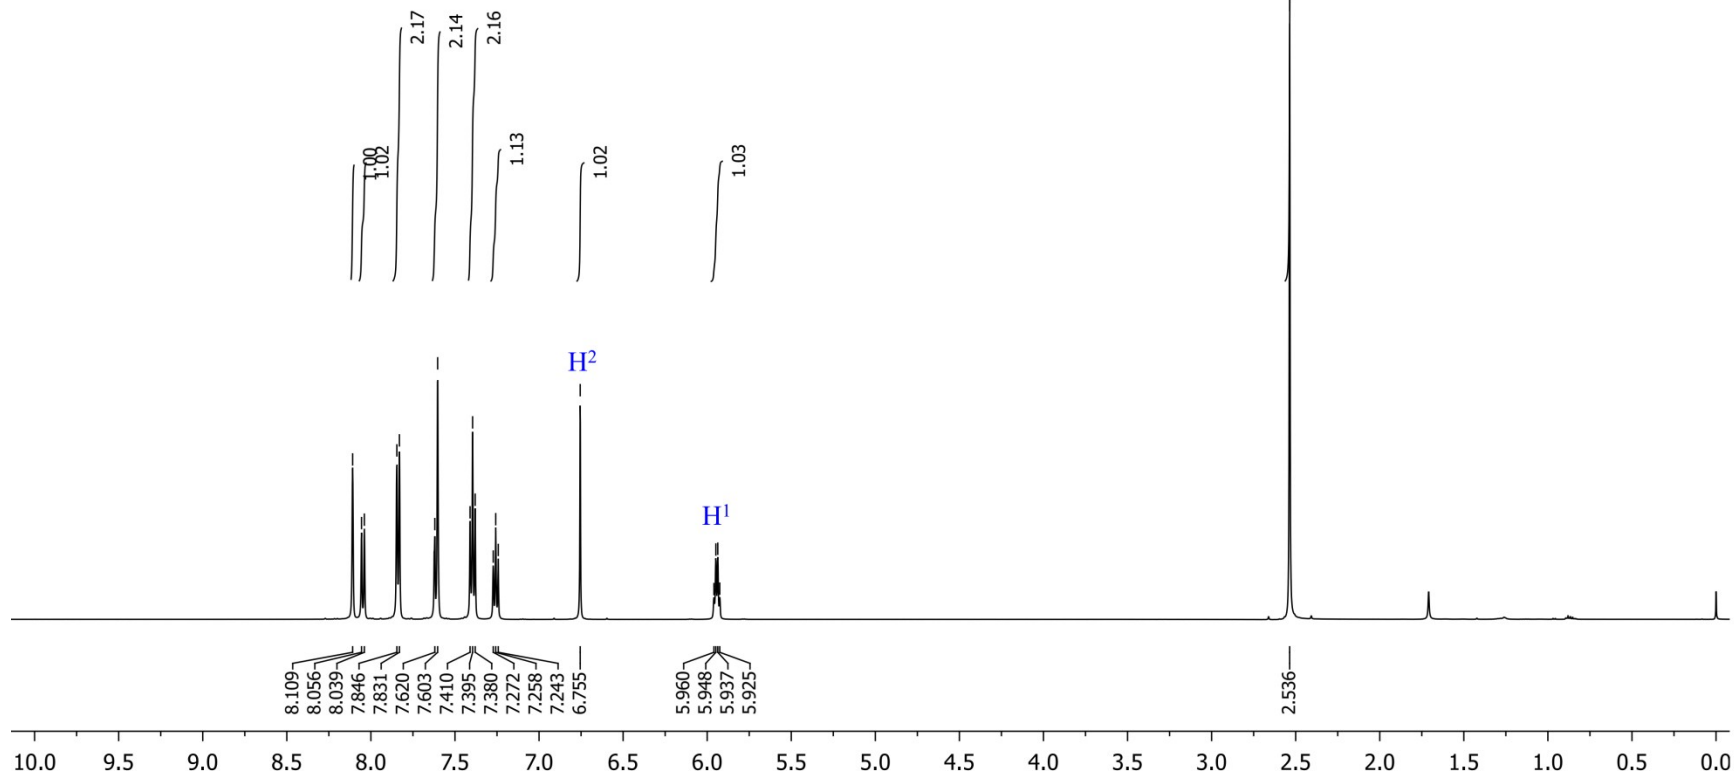

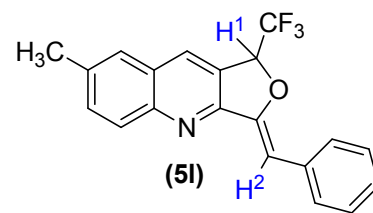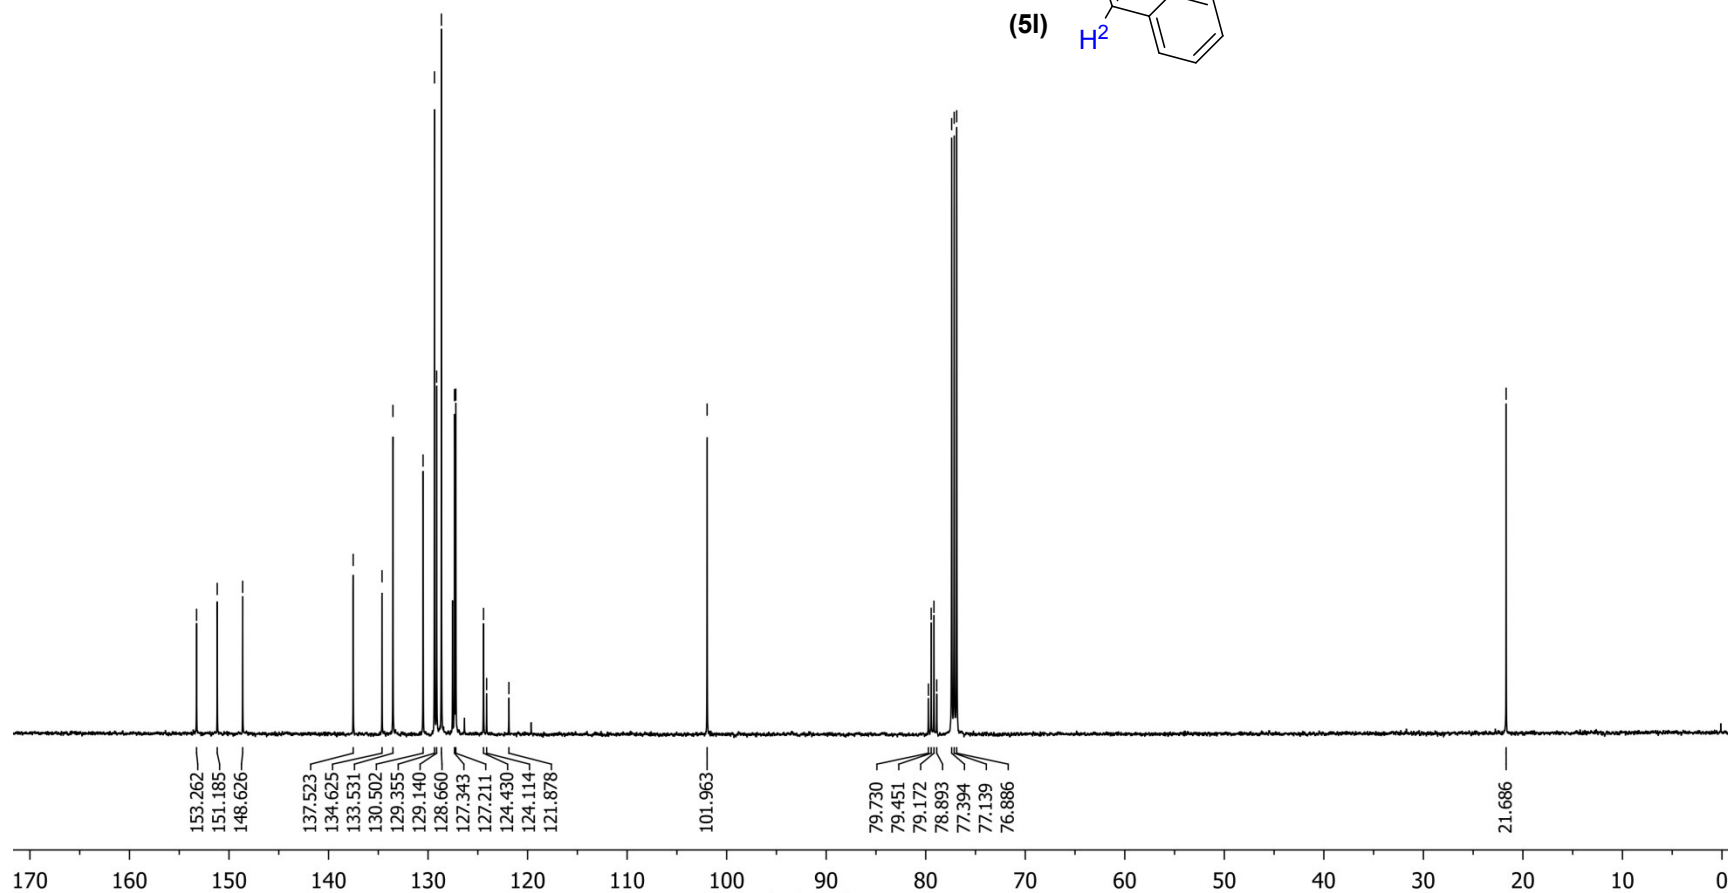

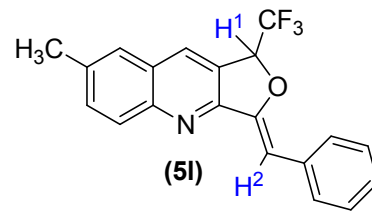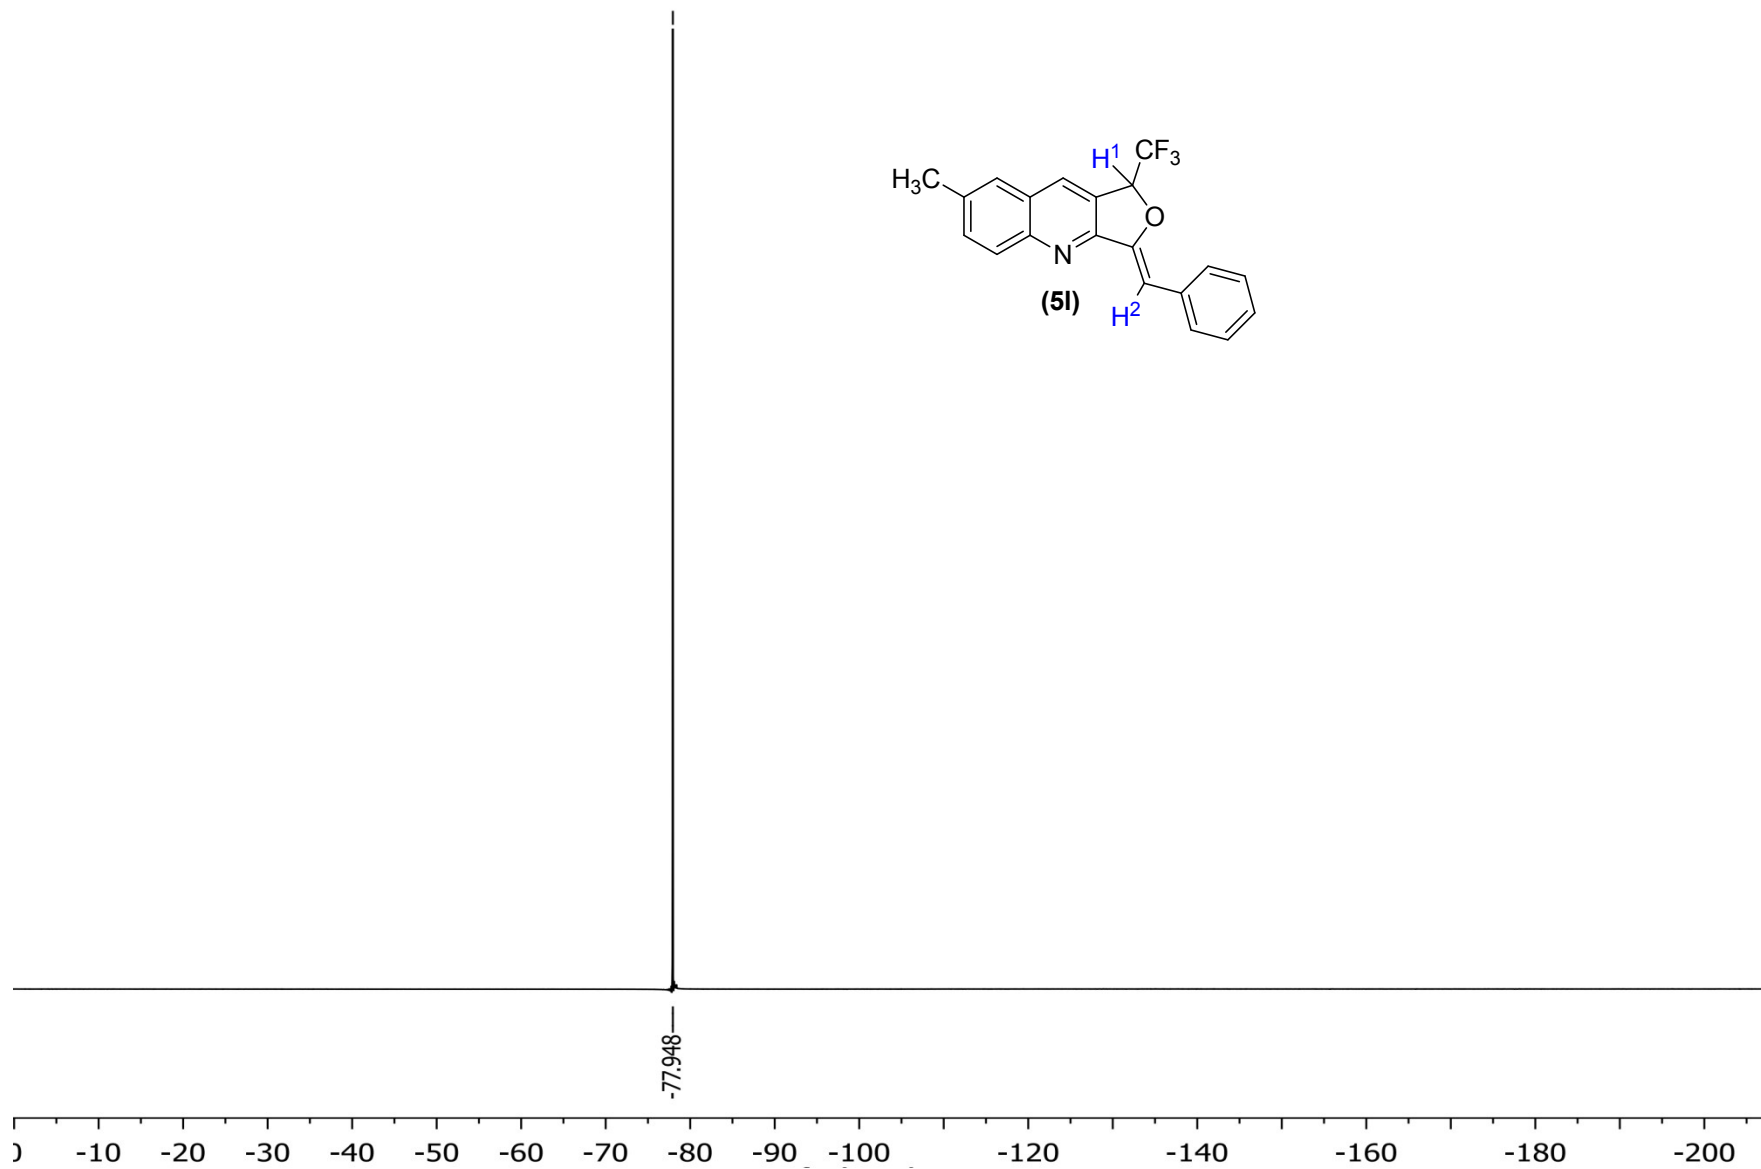

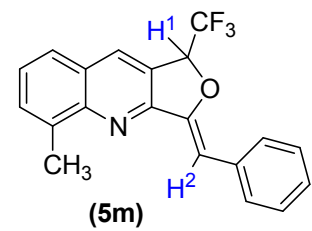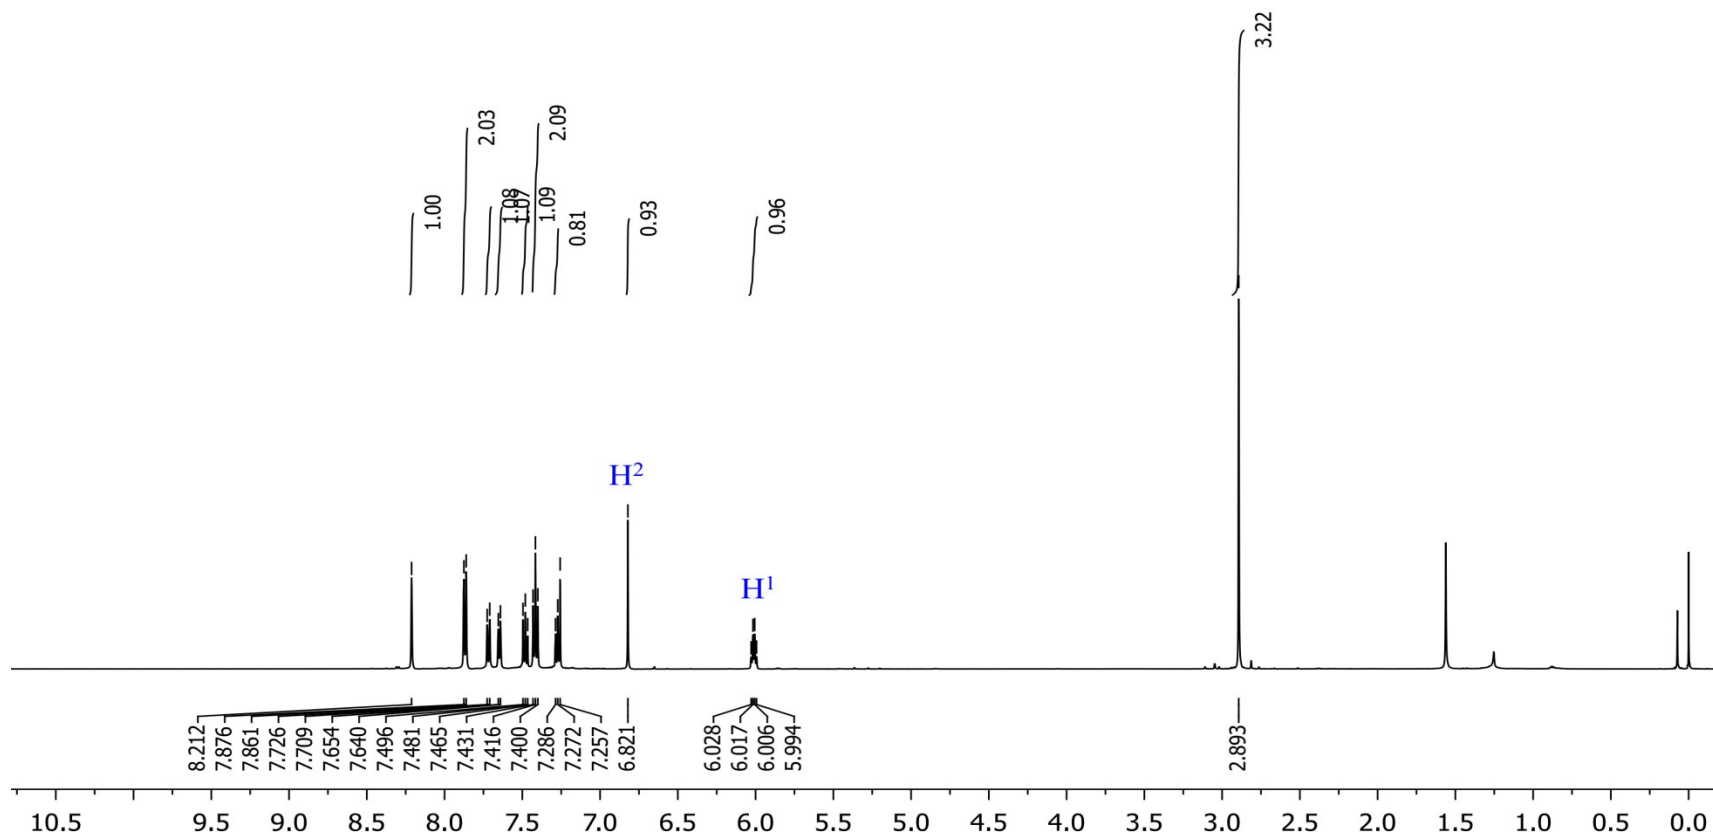



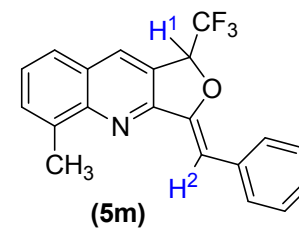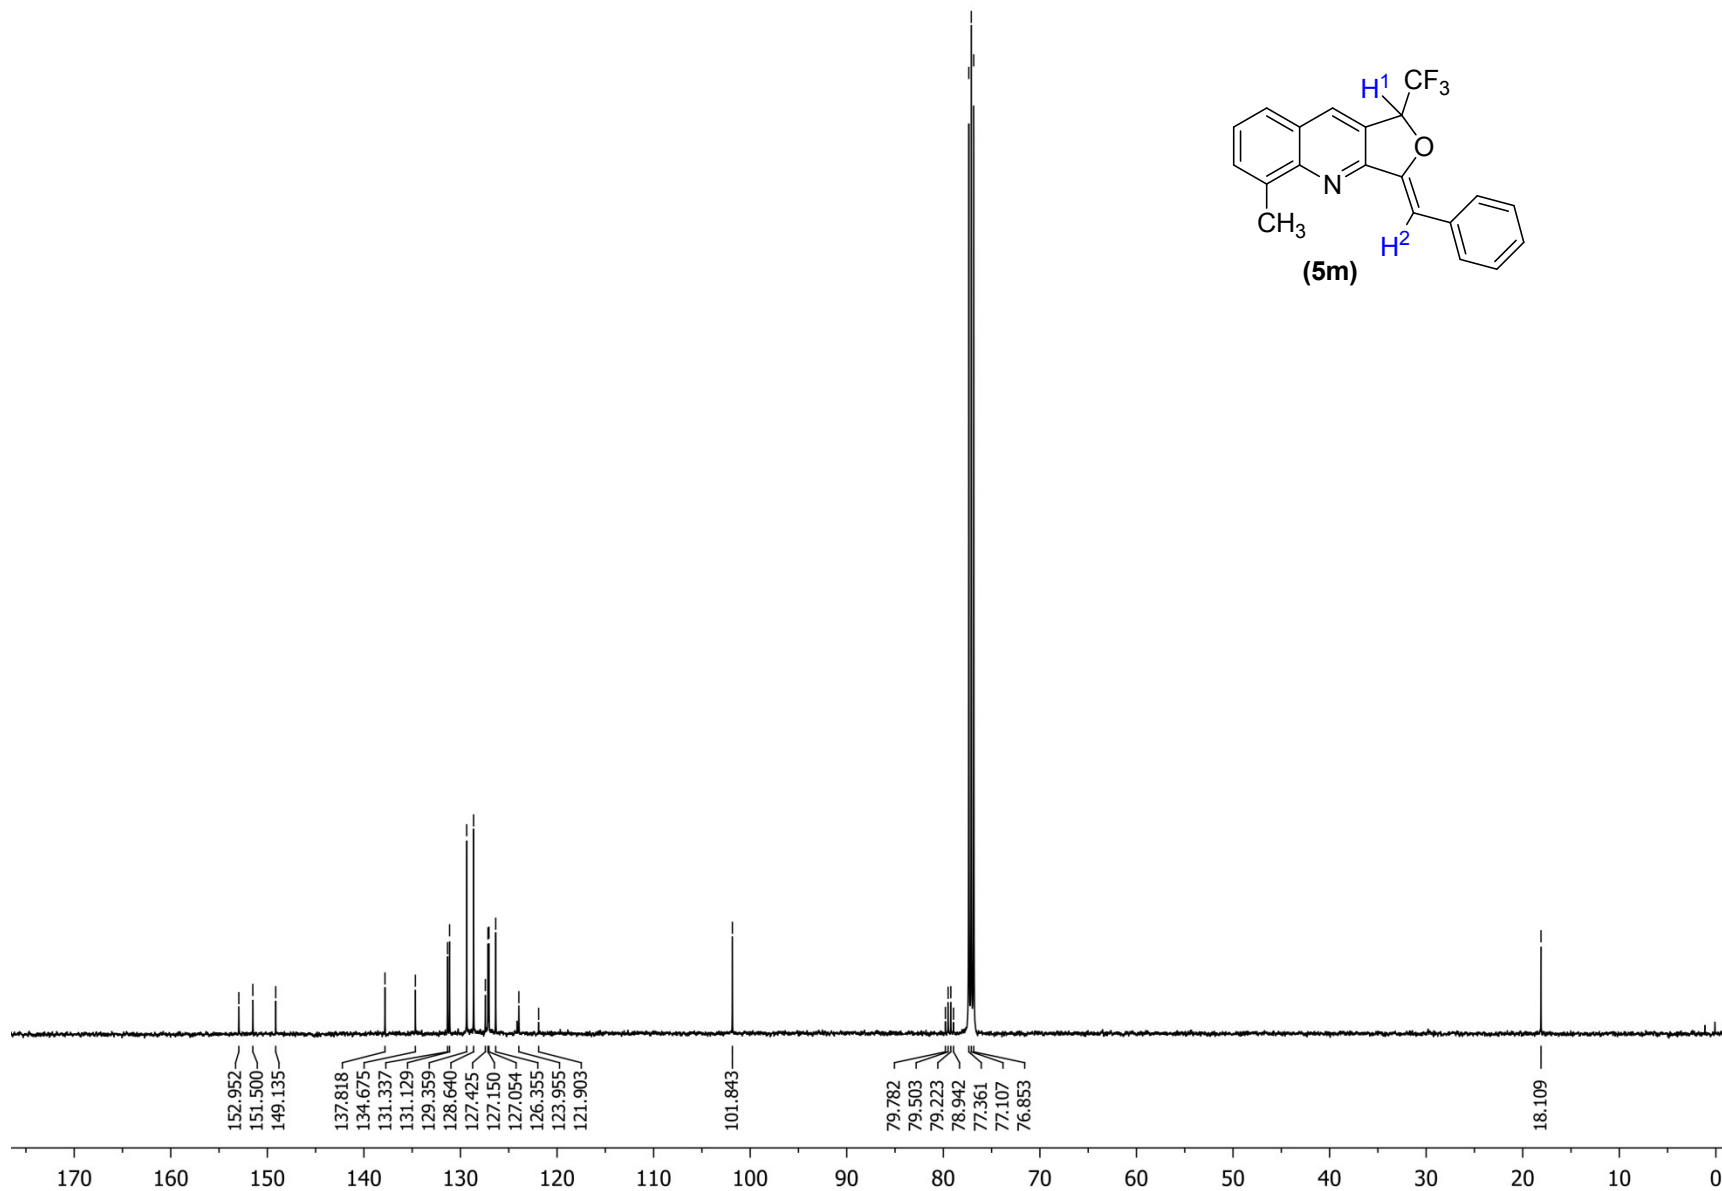

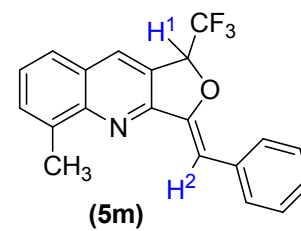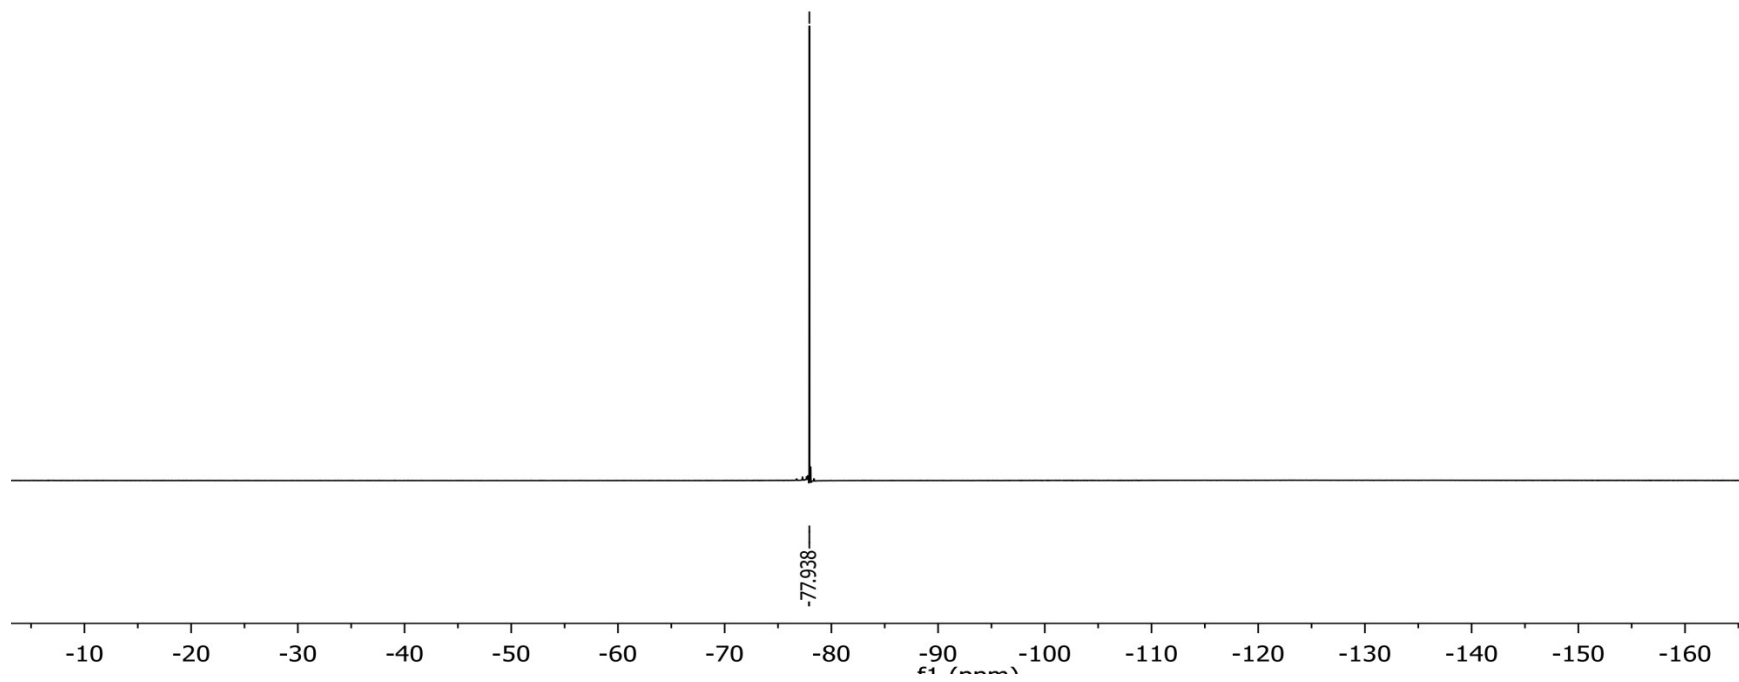

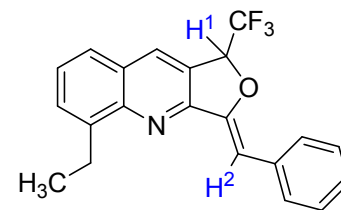

(5n)

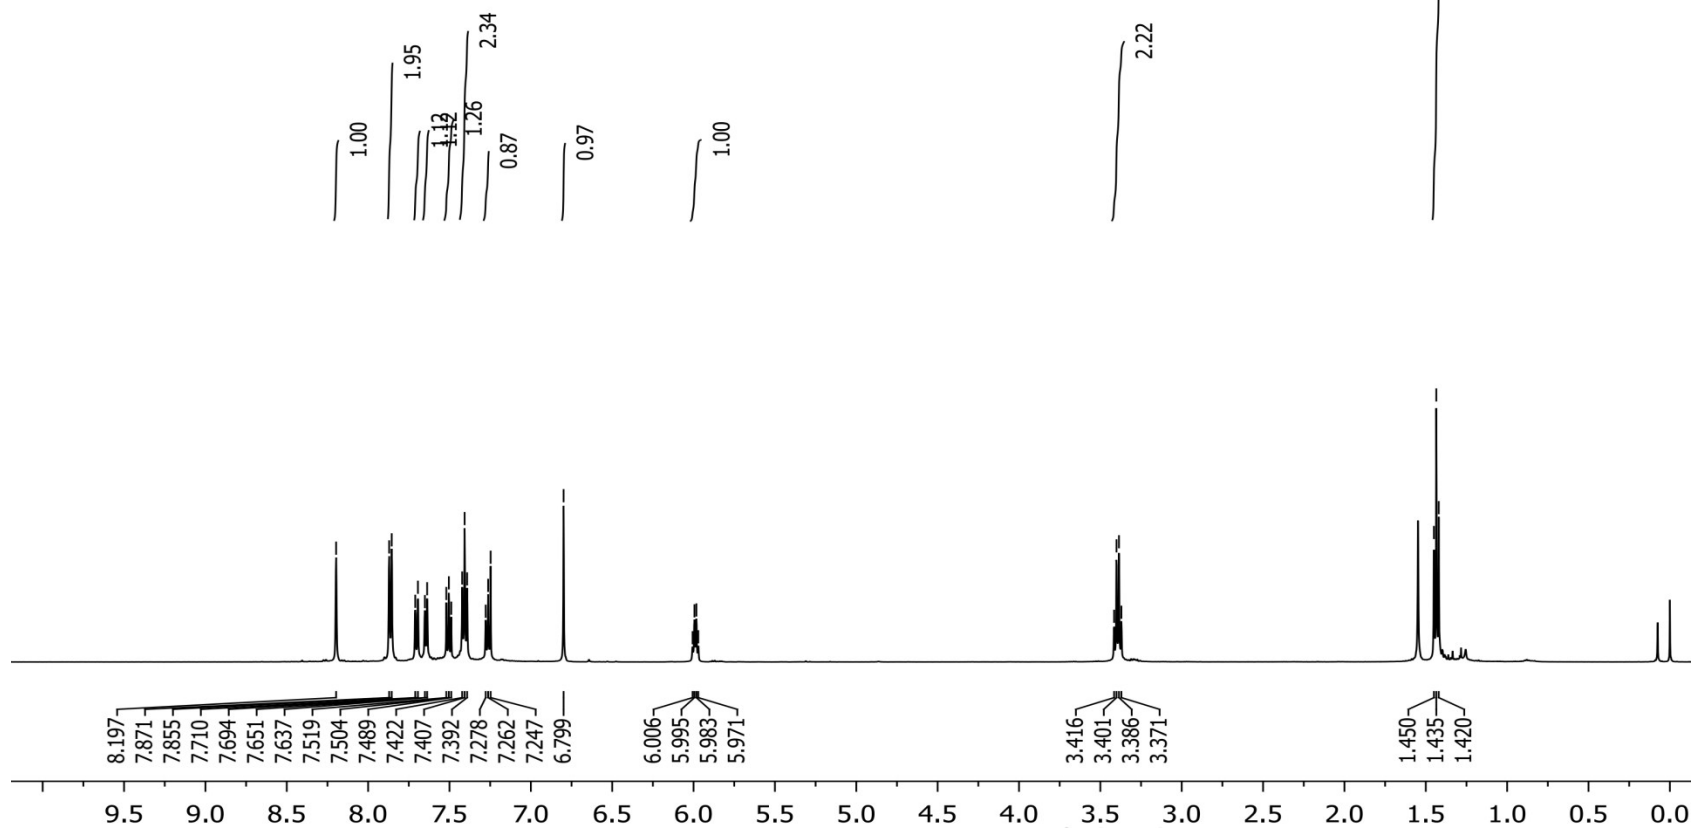

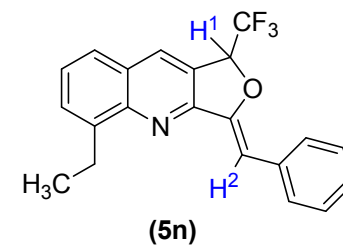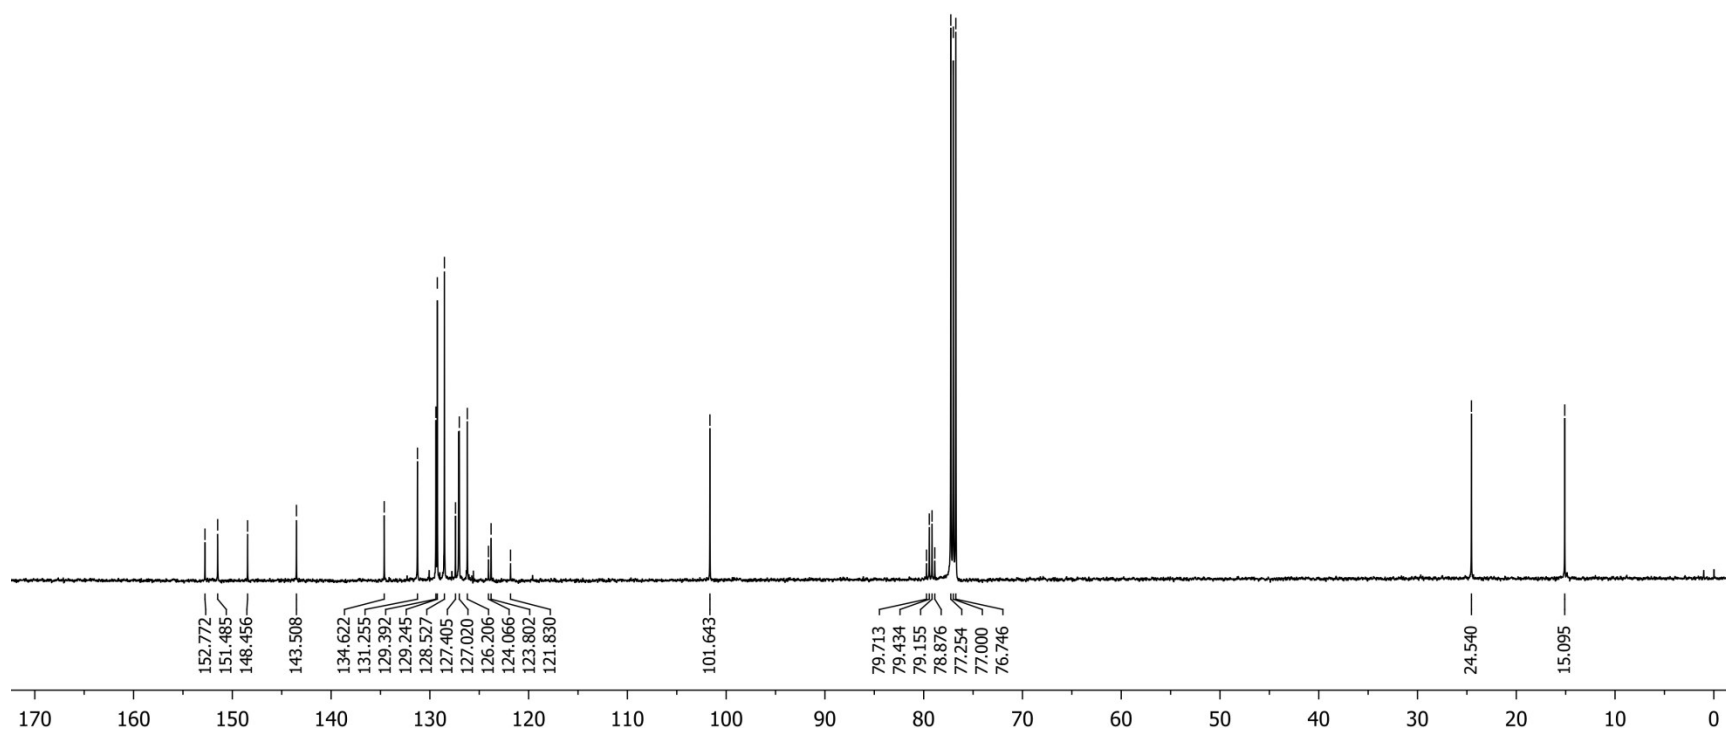

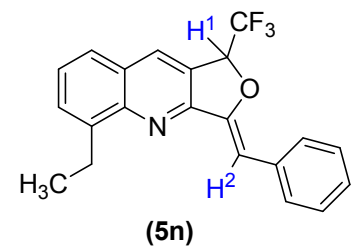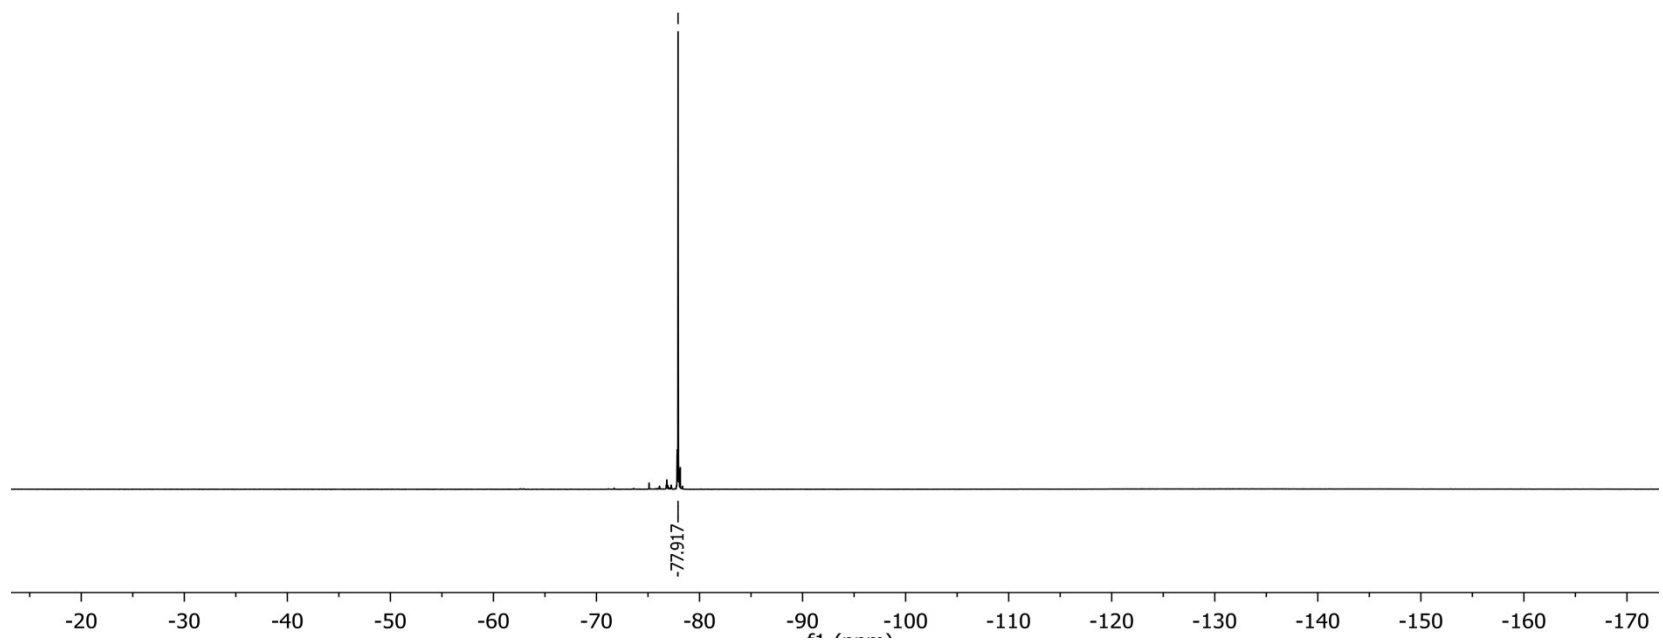

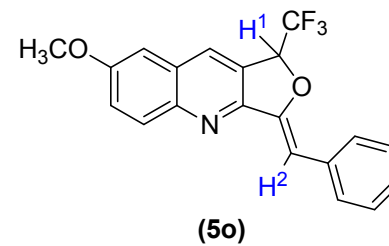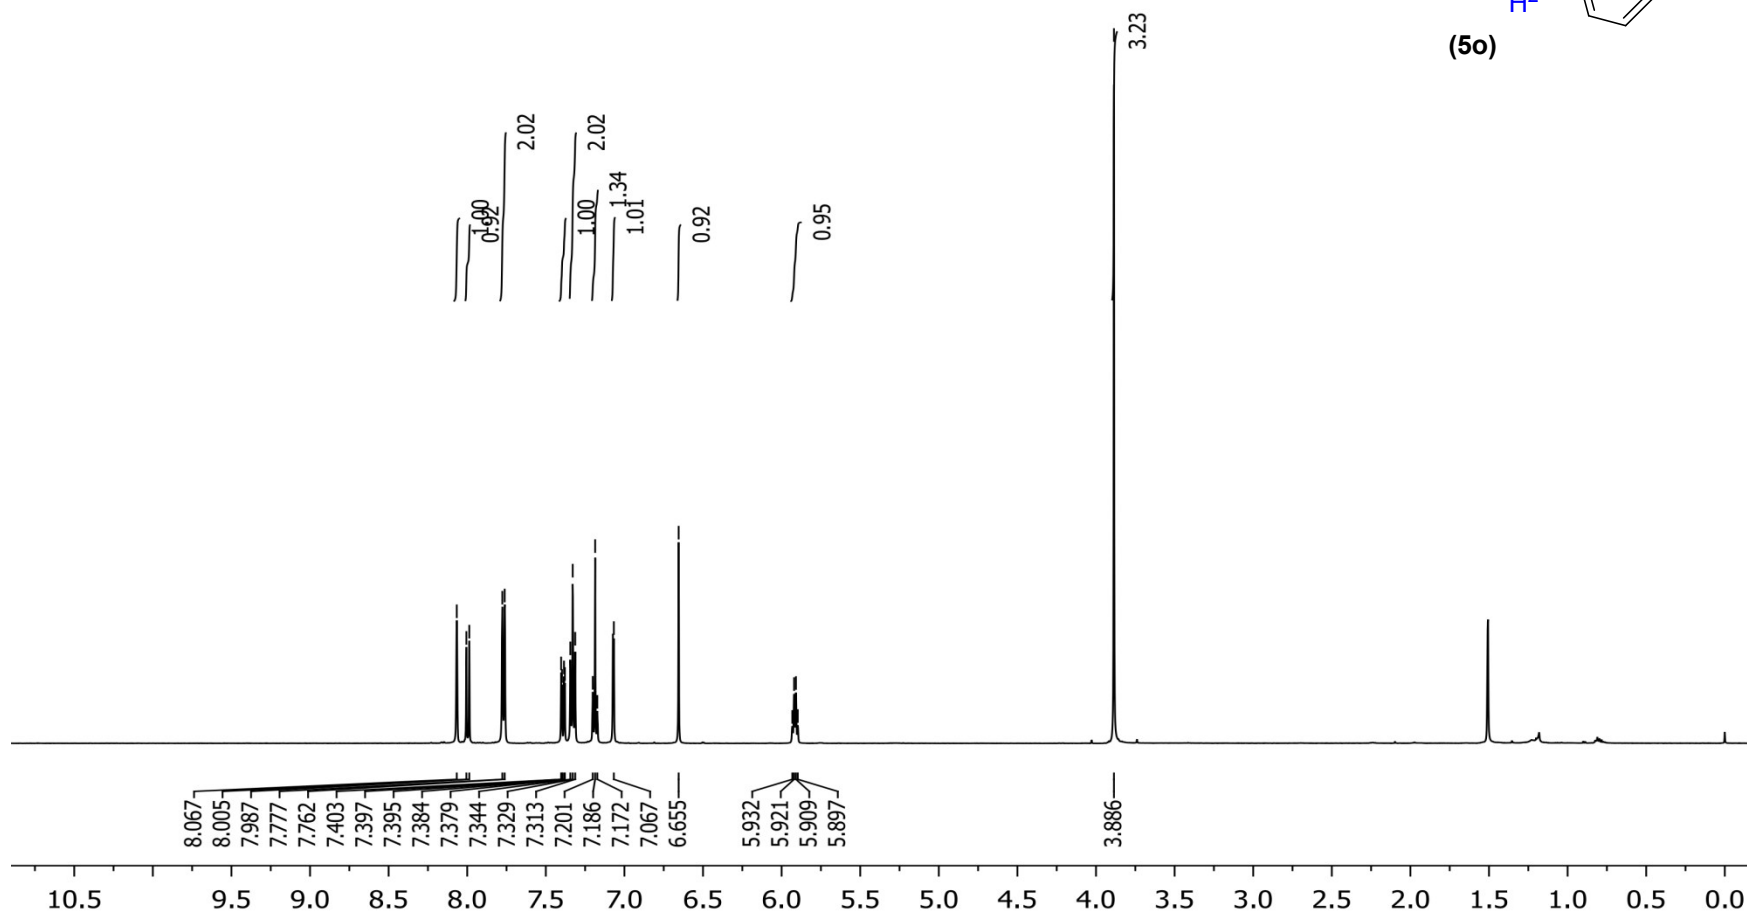

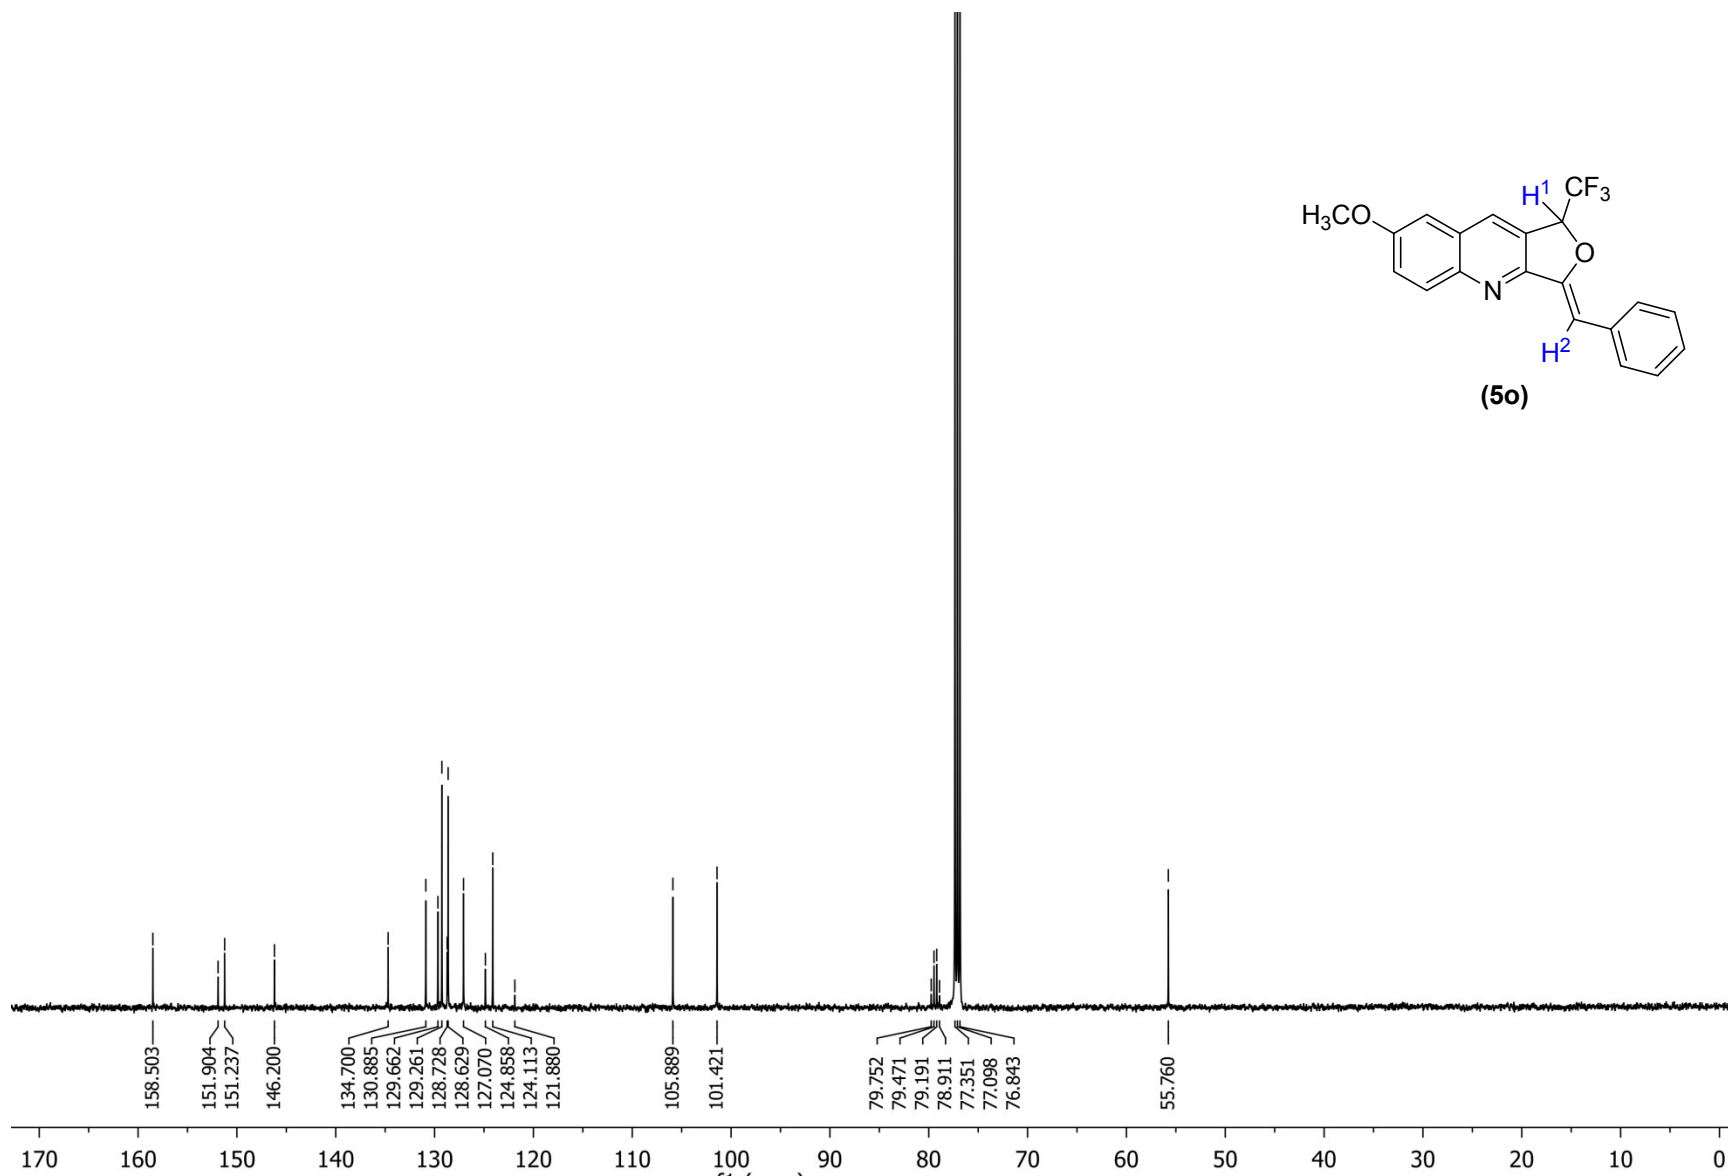

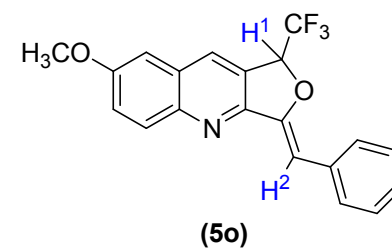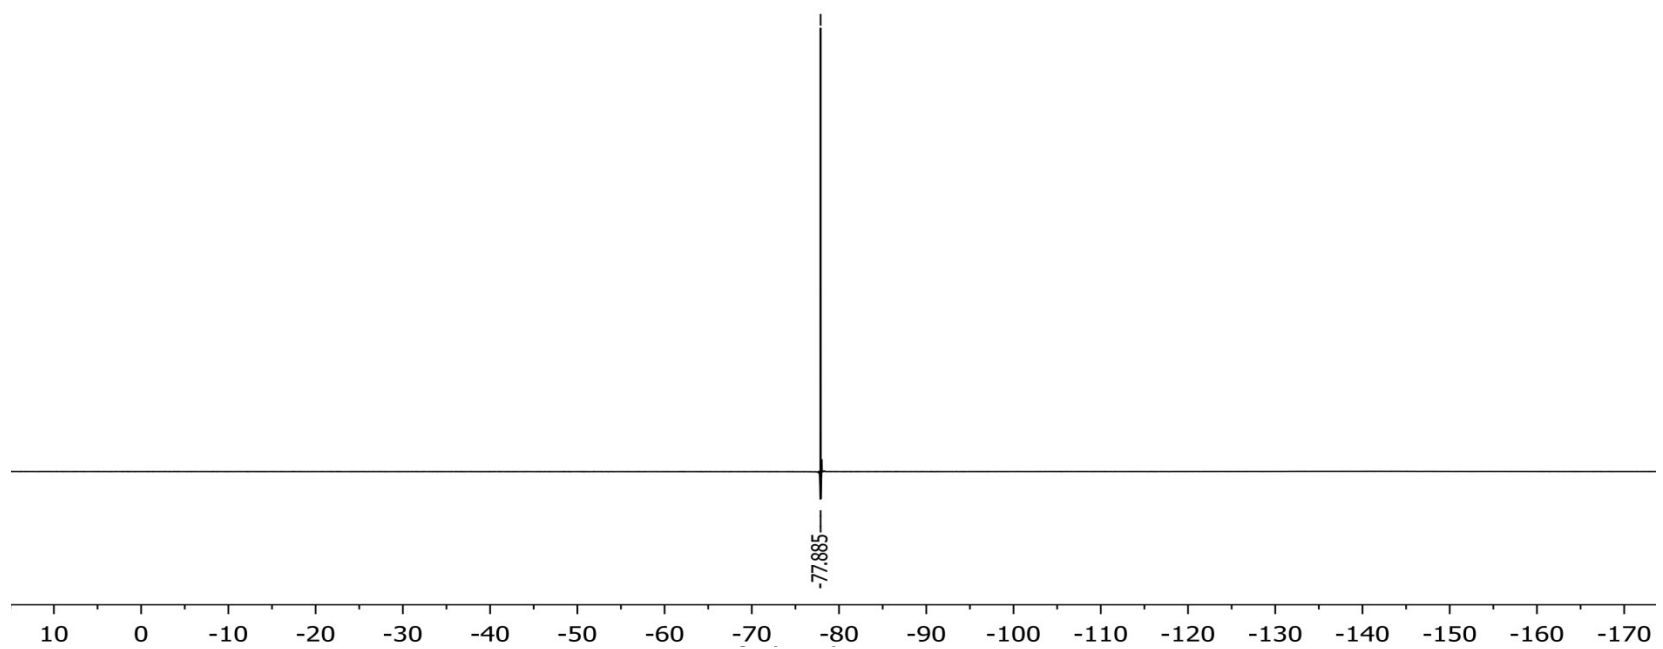



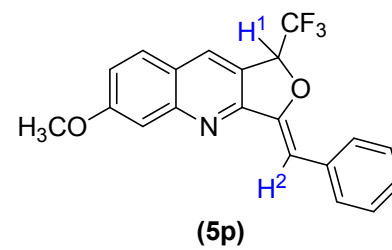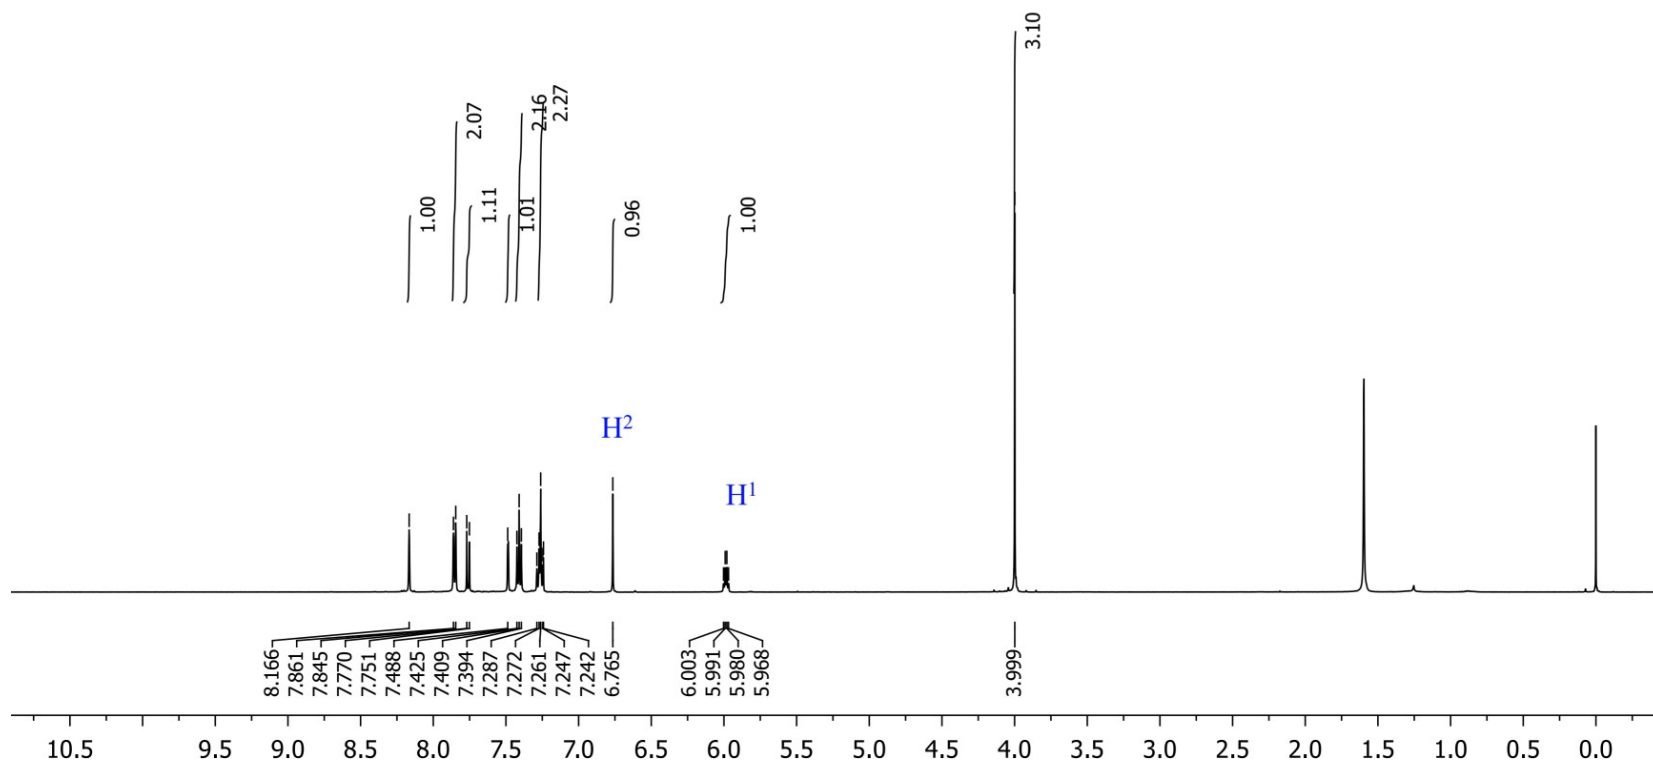

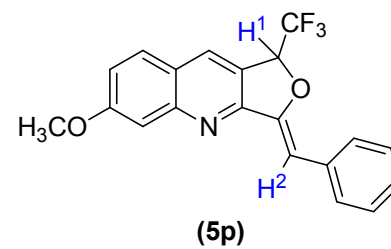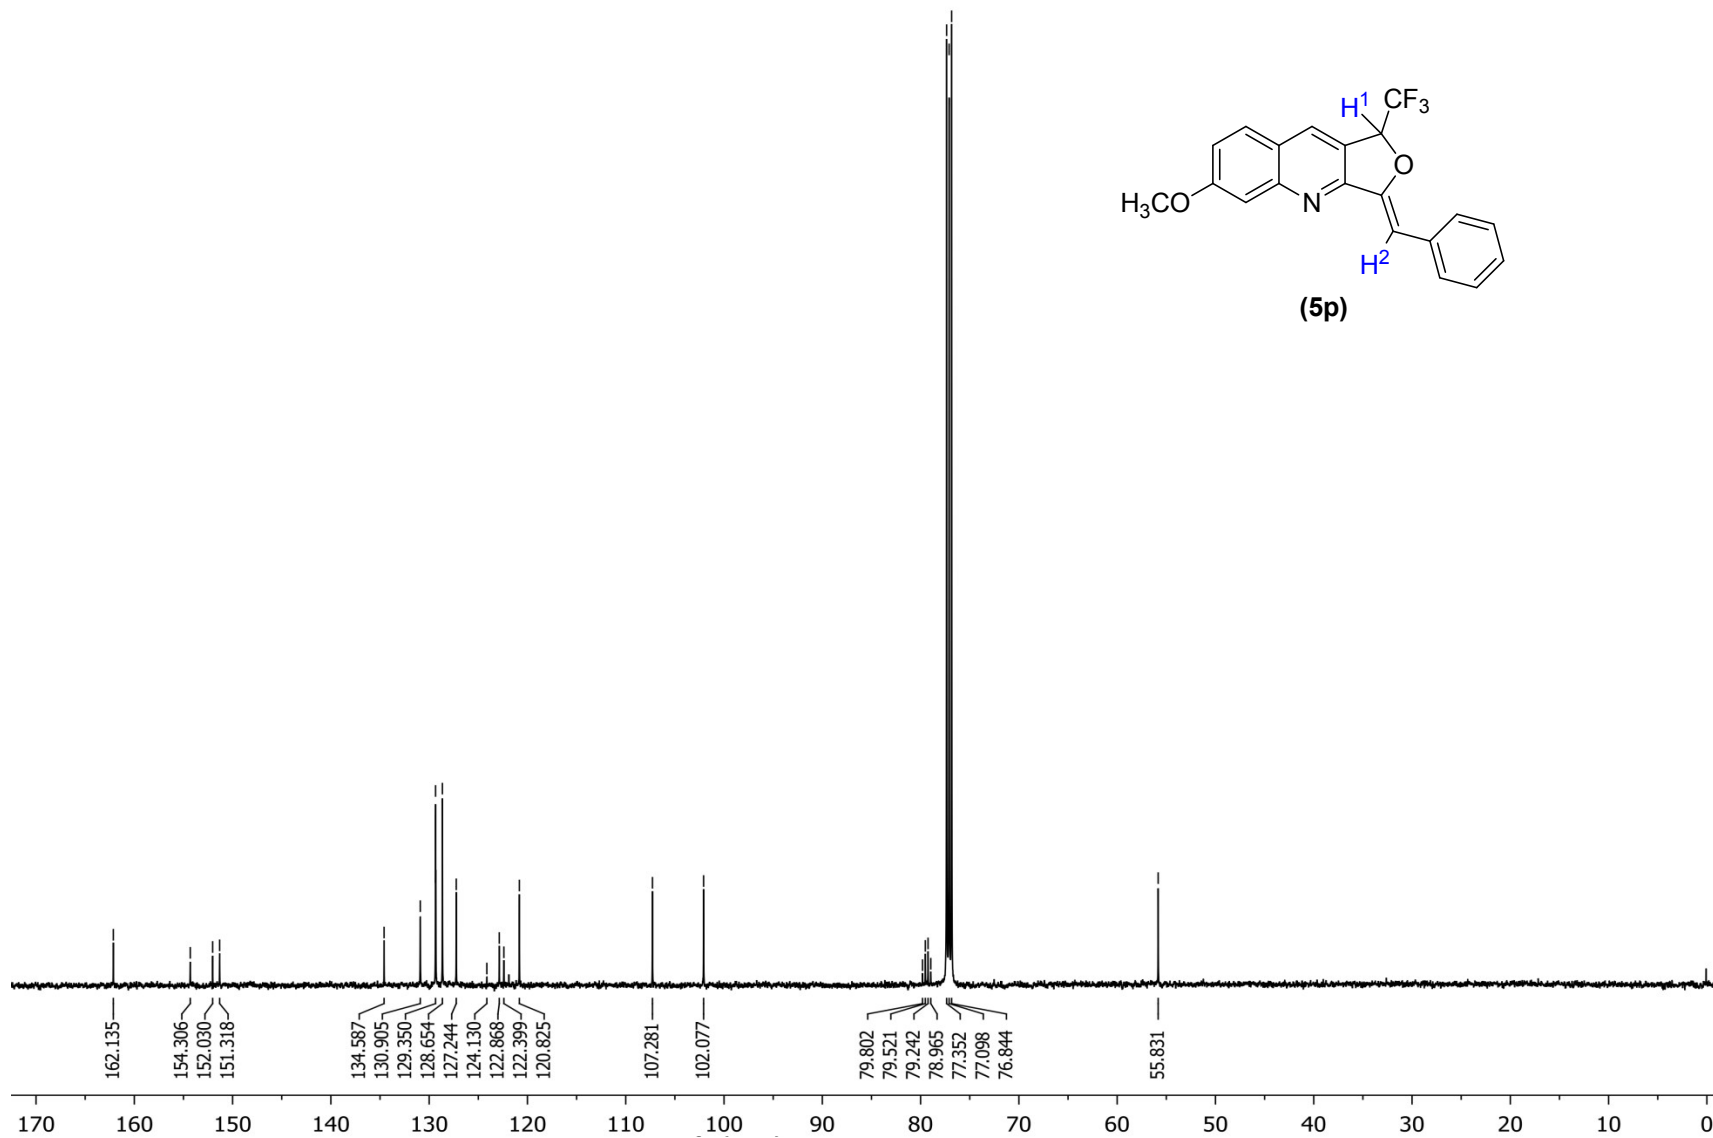

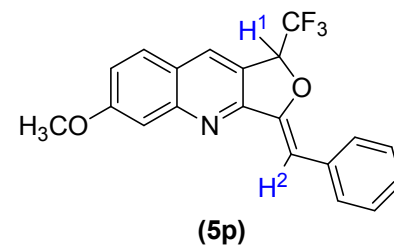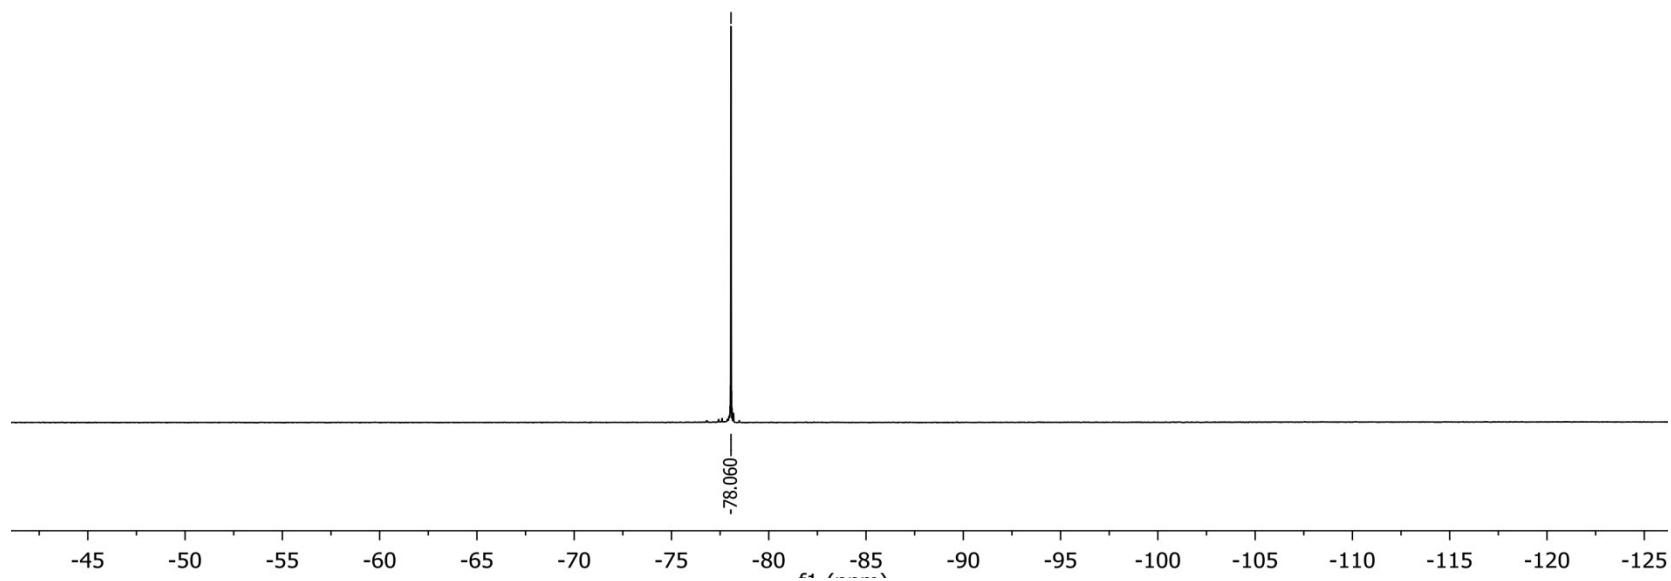

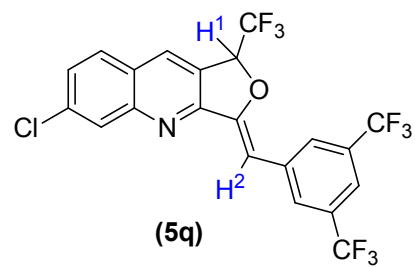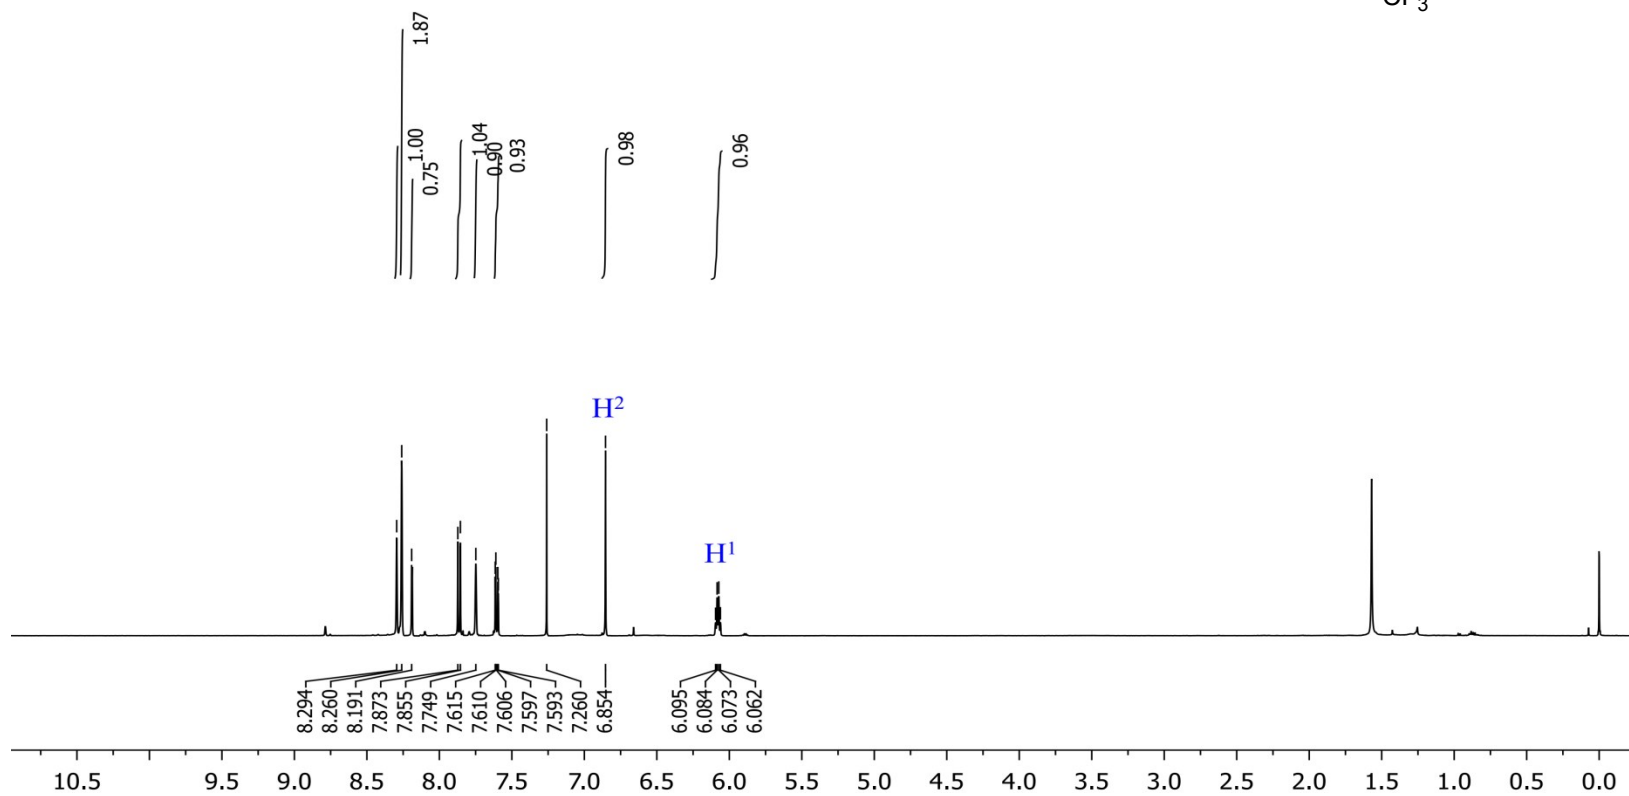

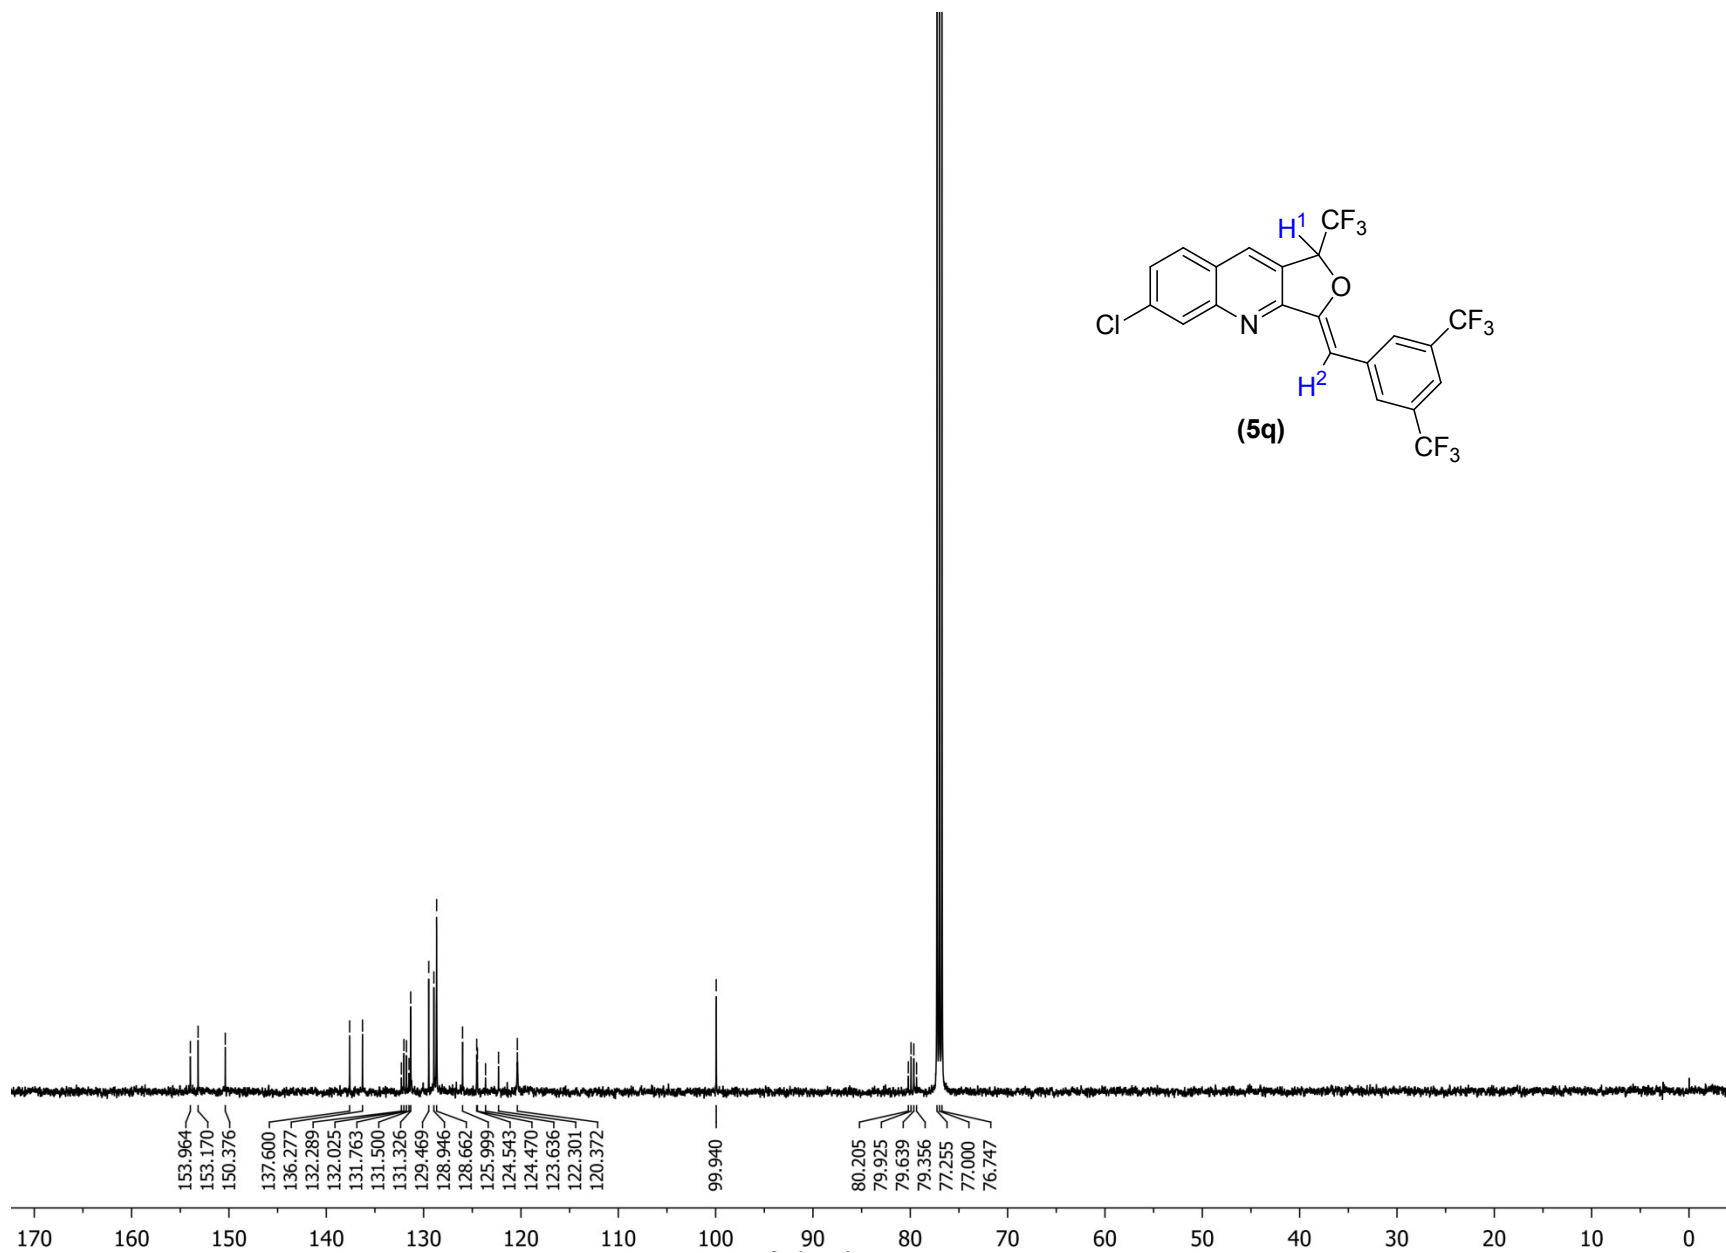

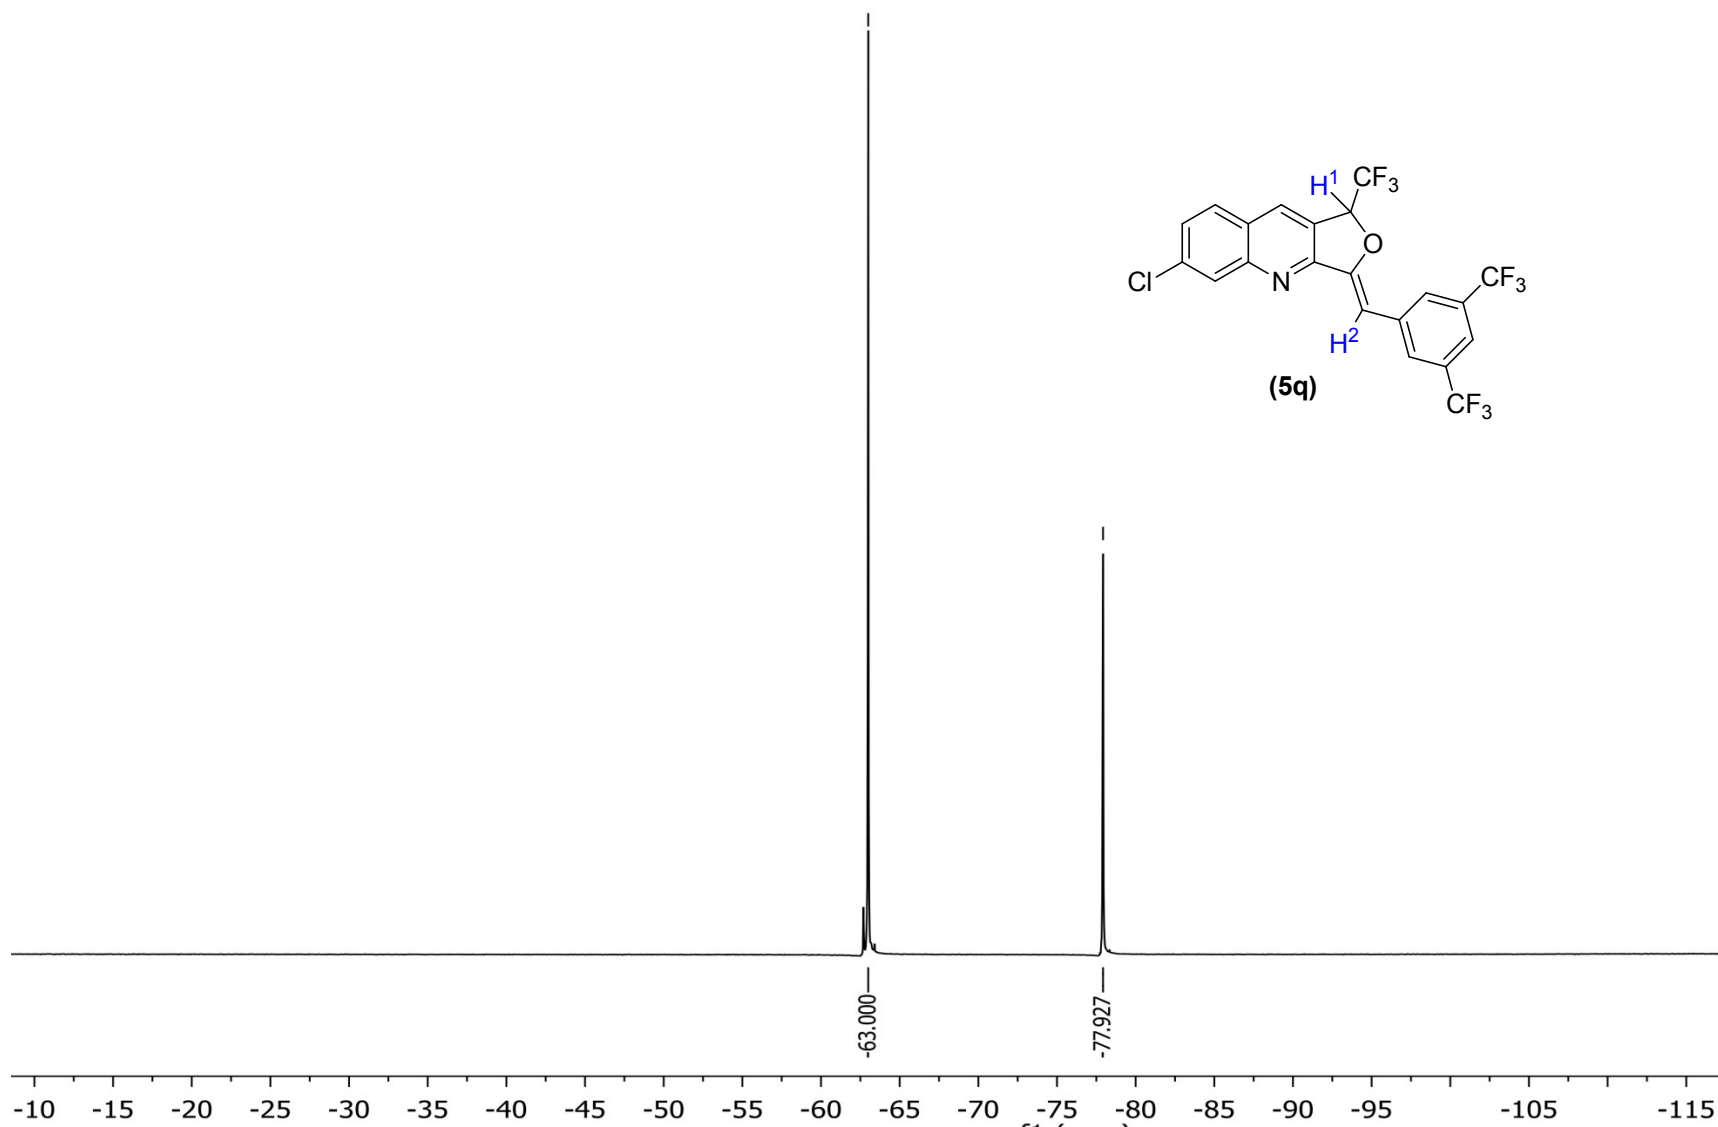

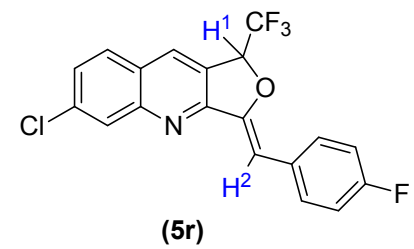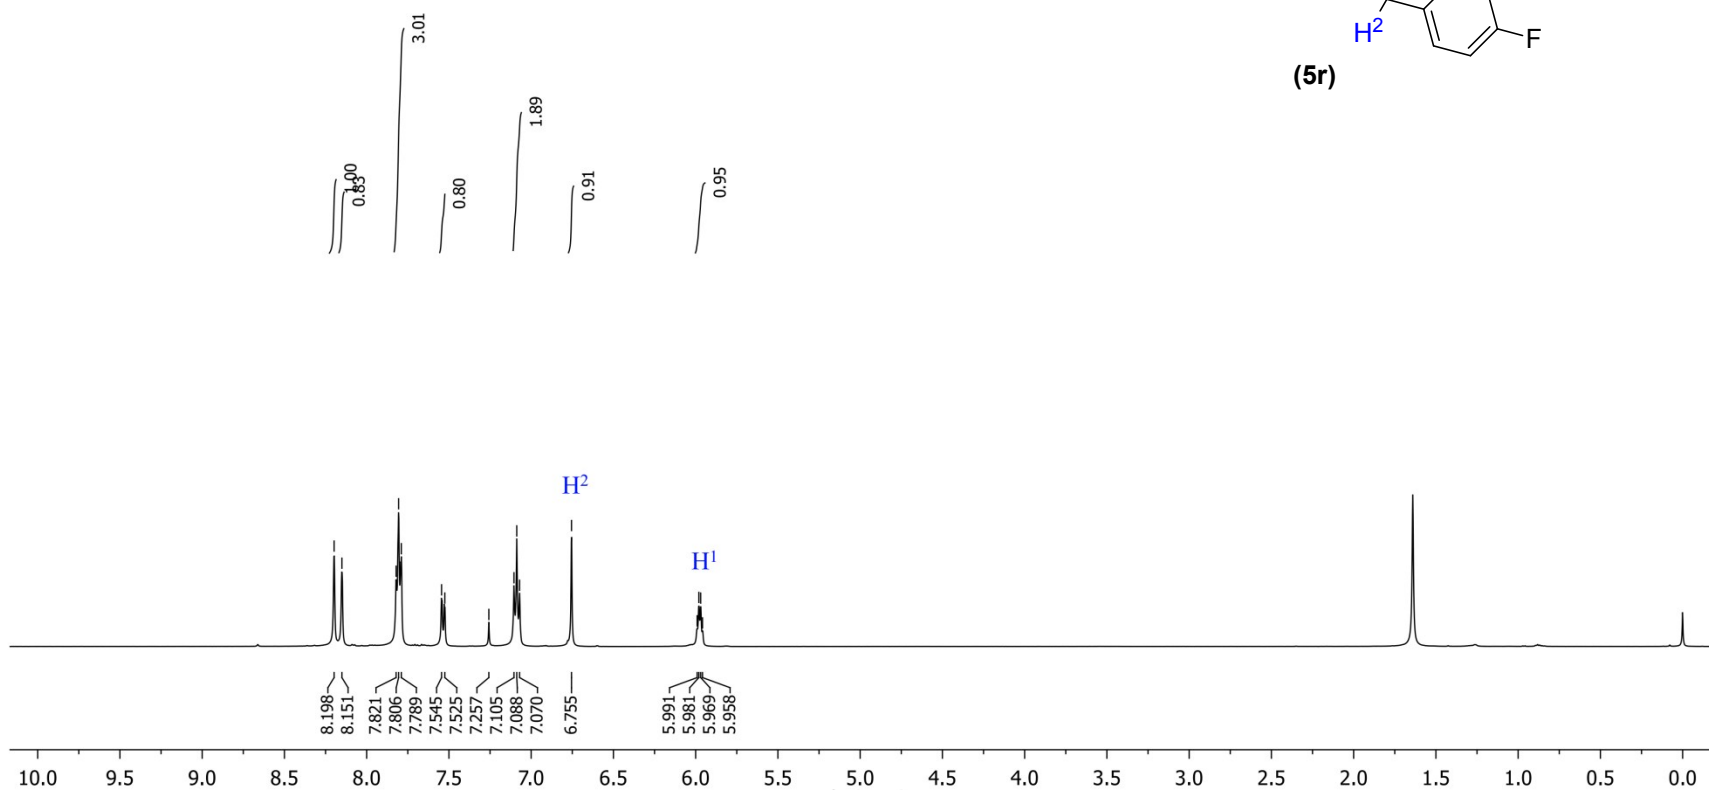

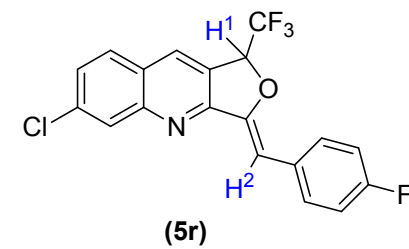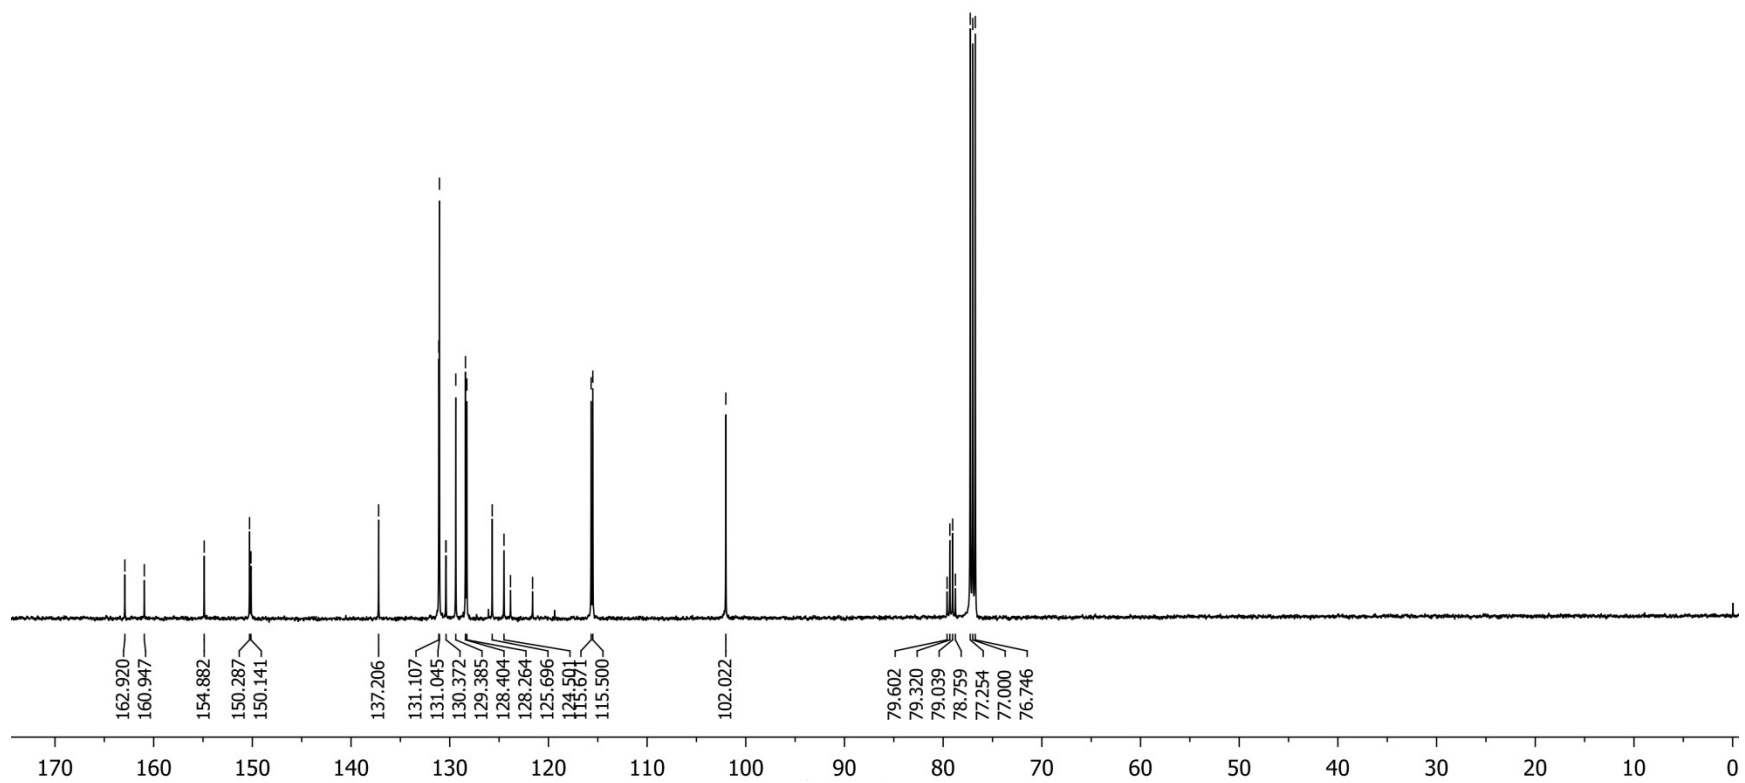



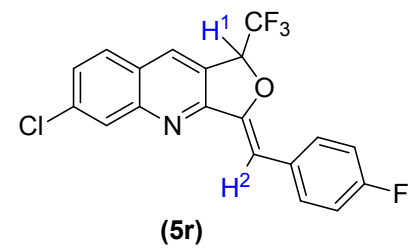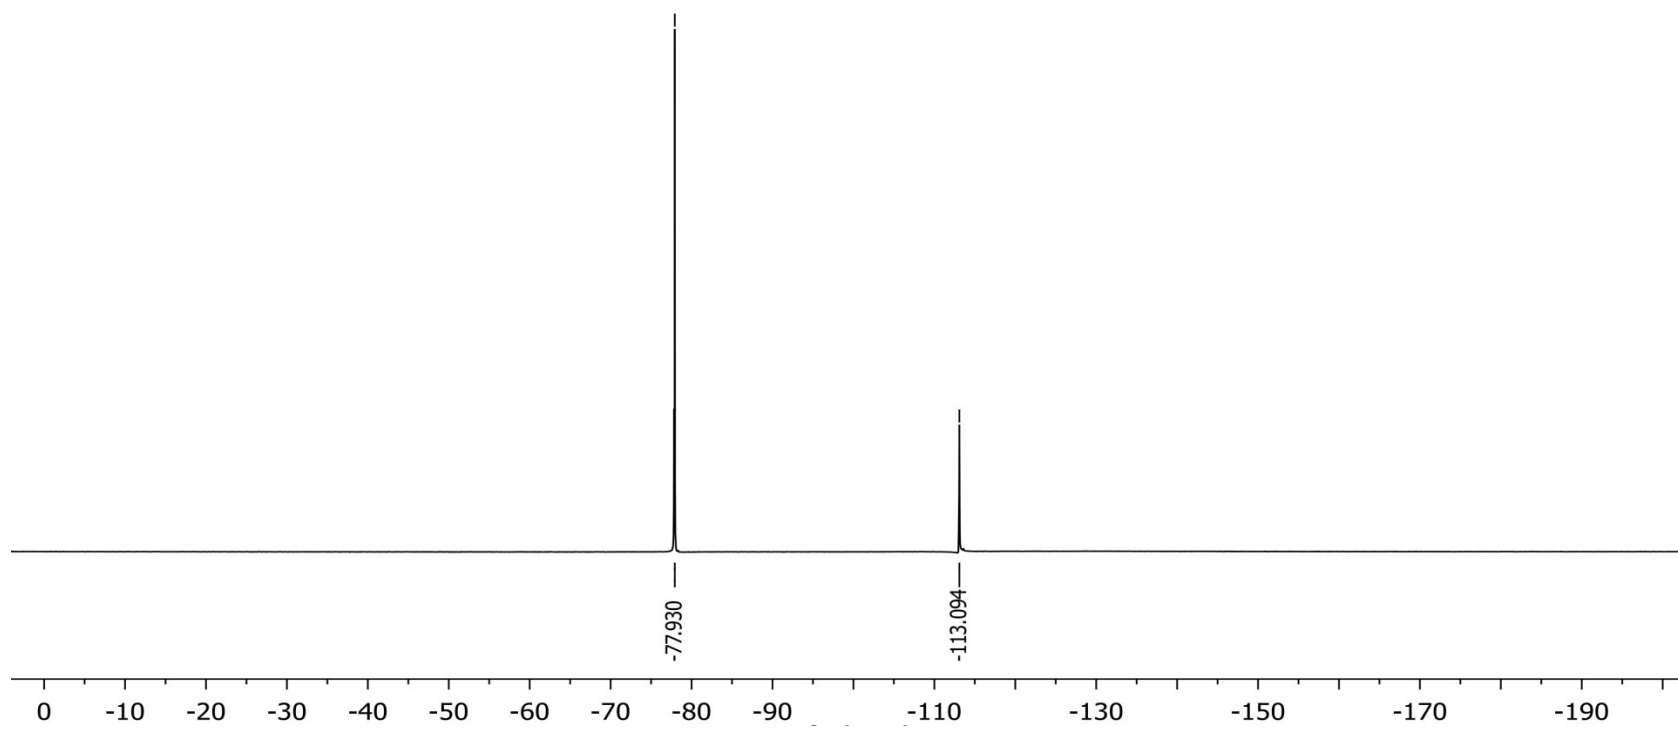

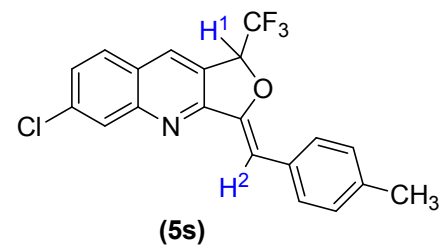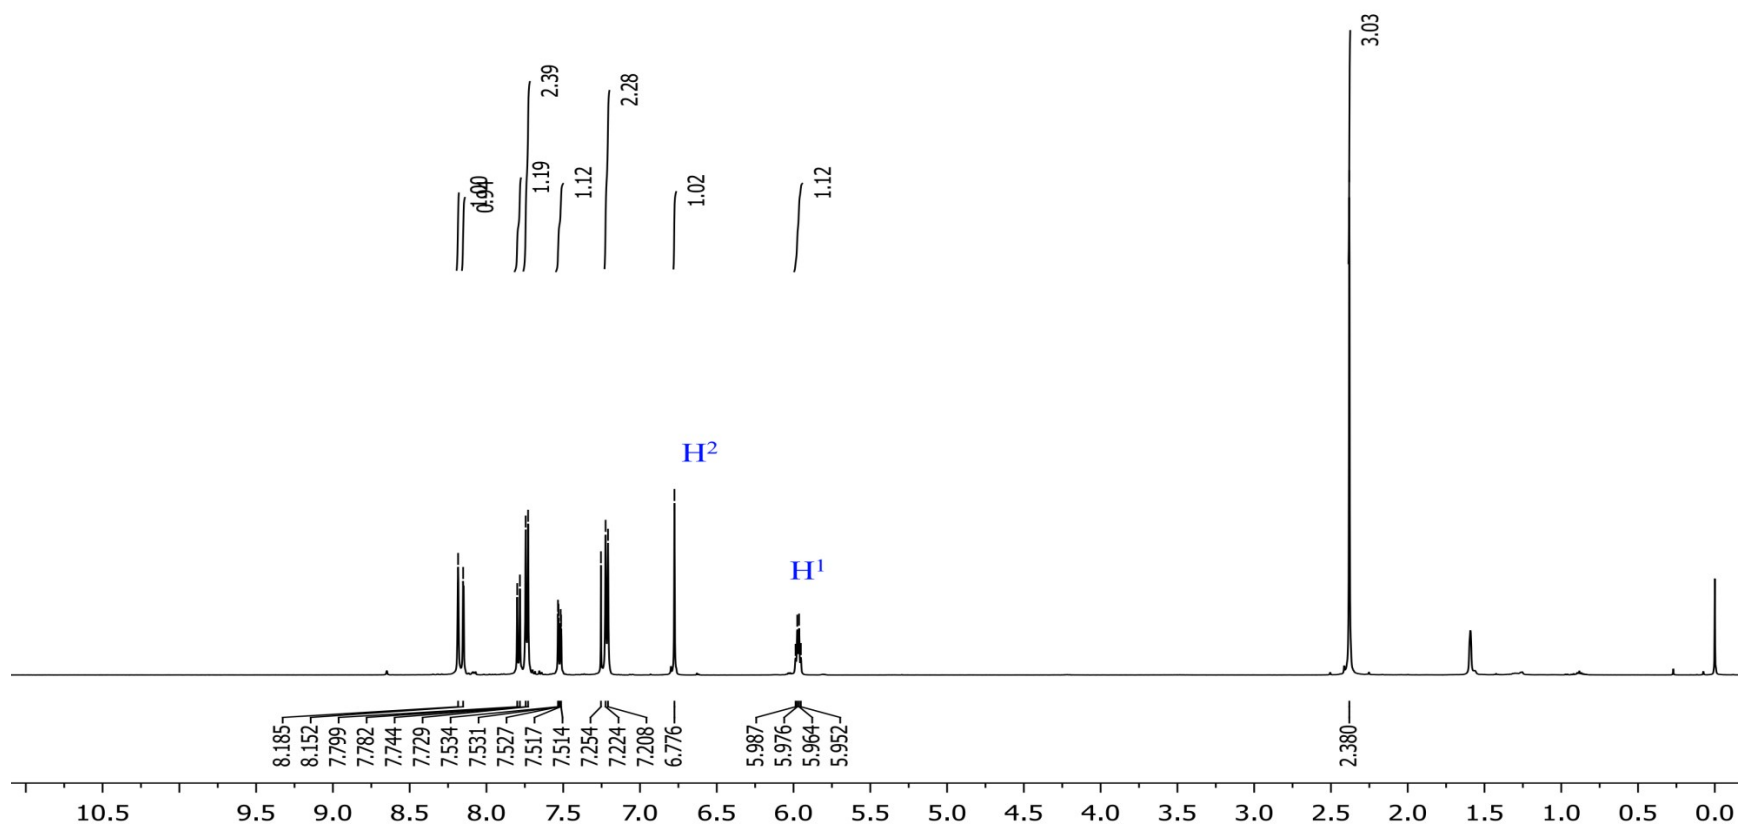

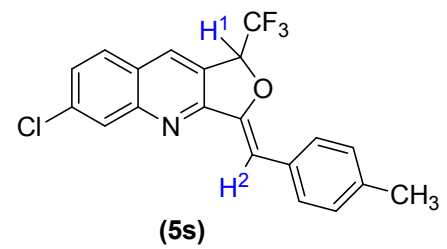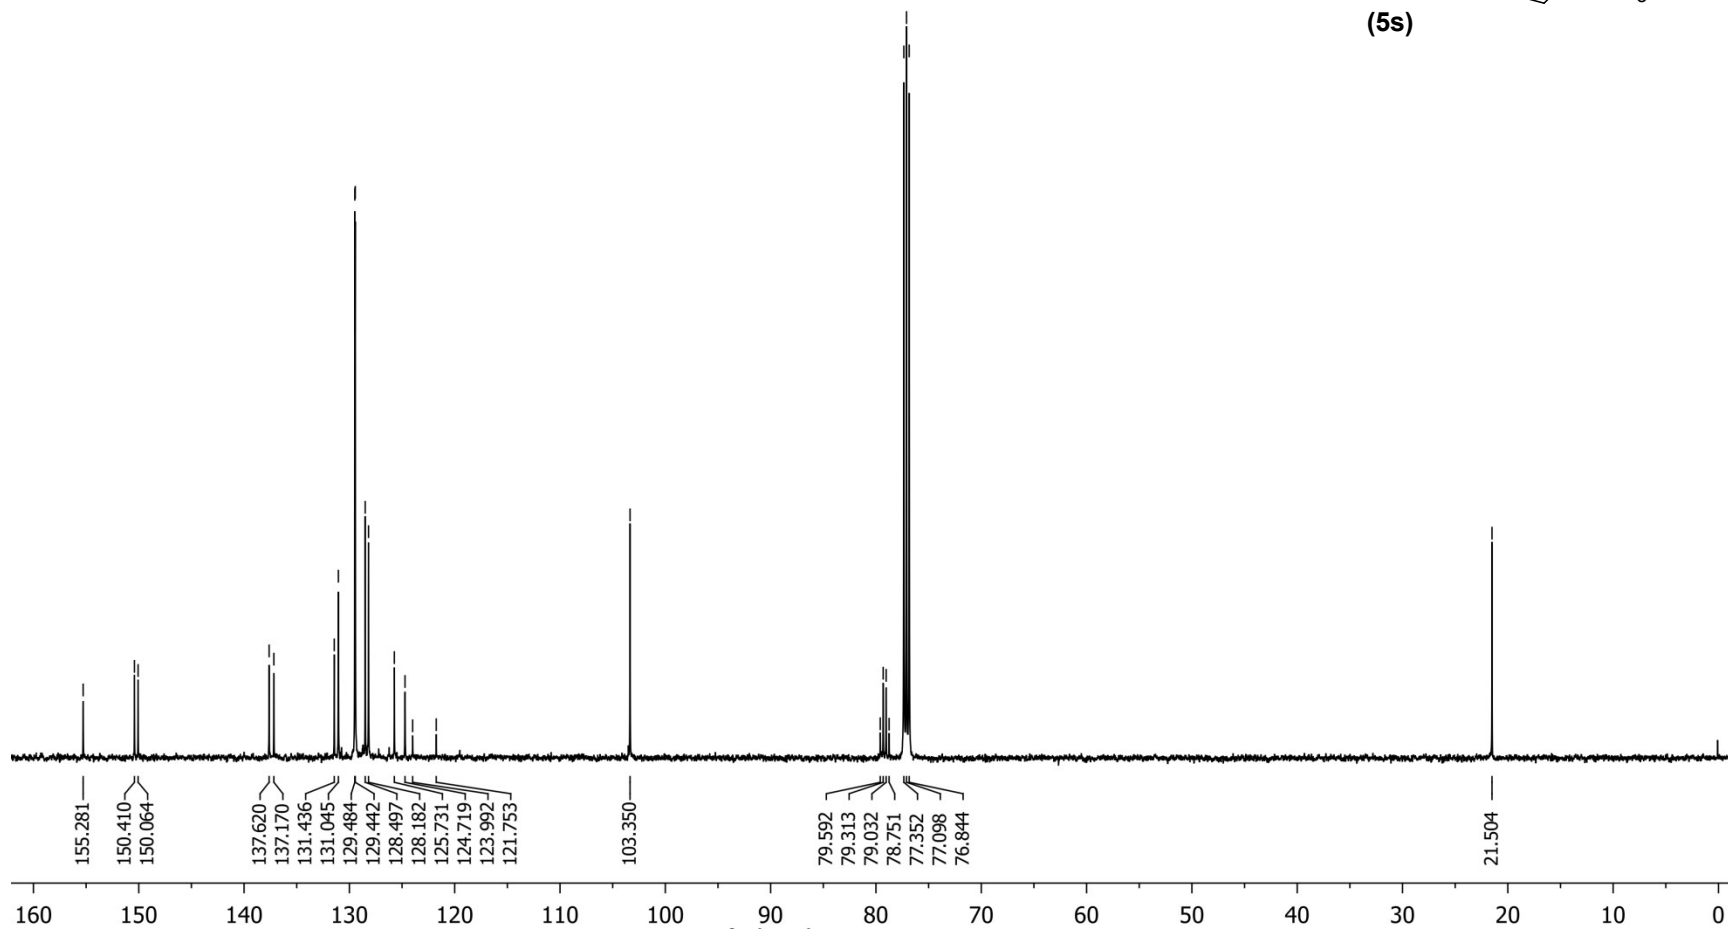

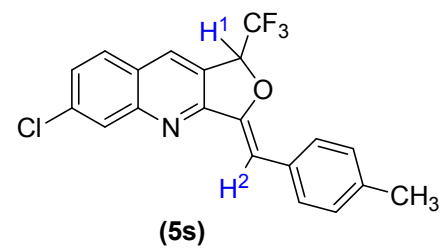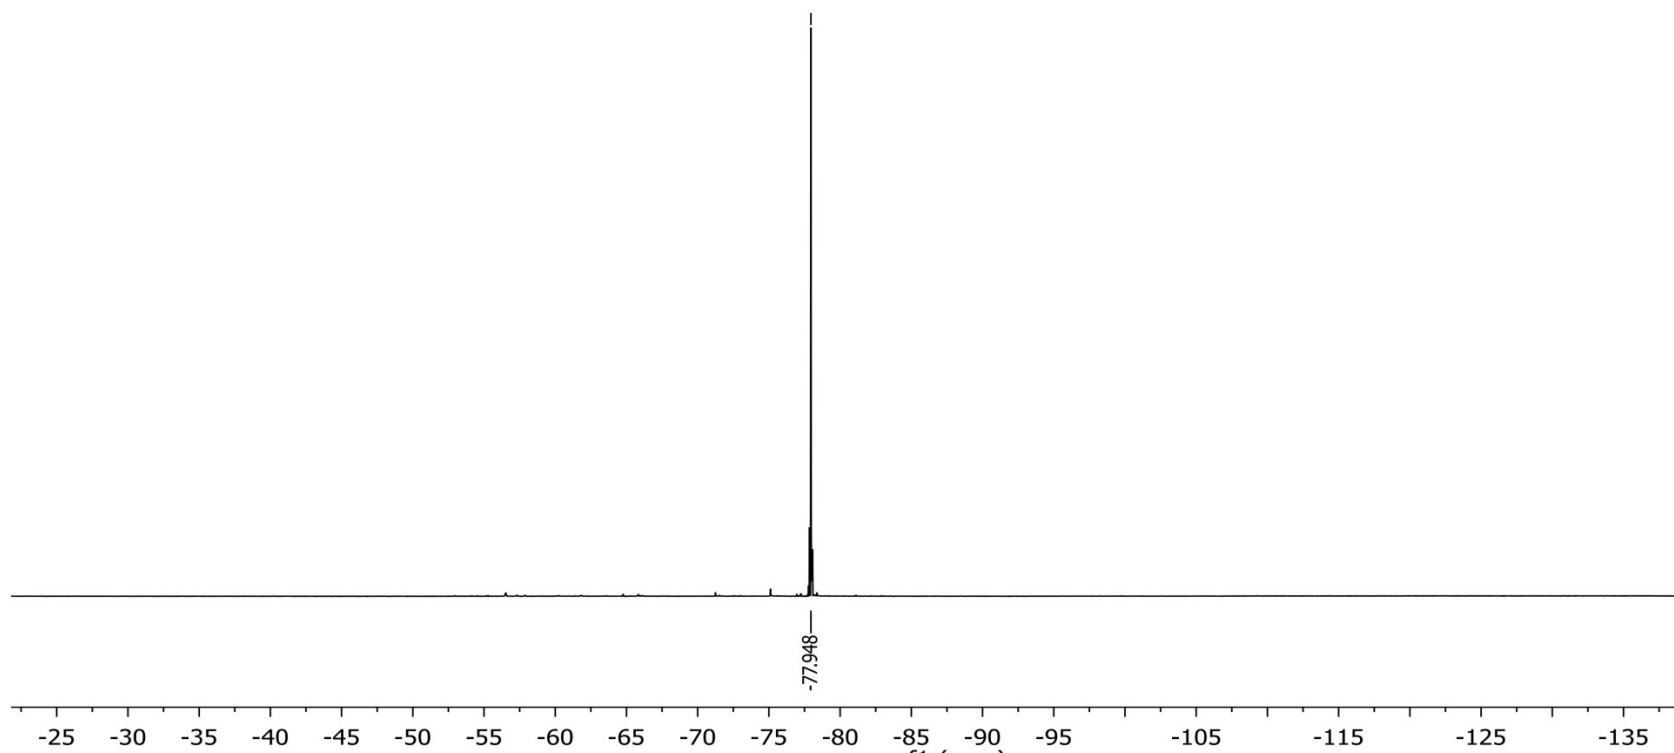

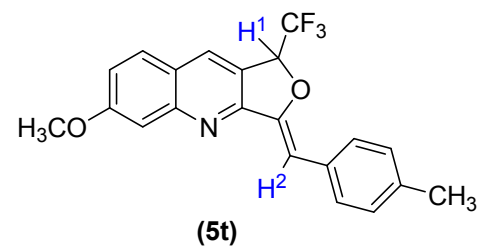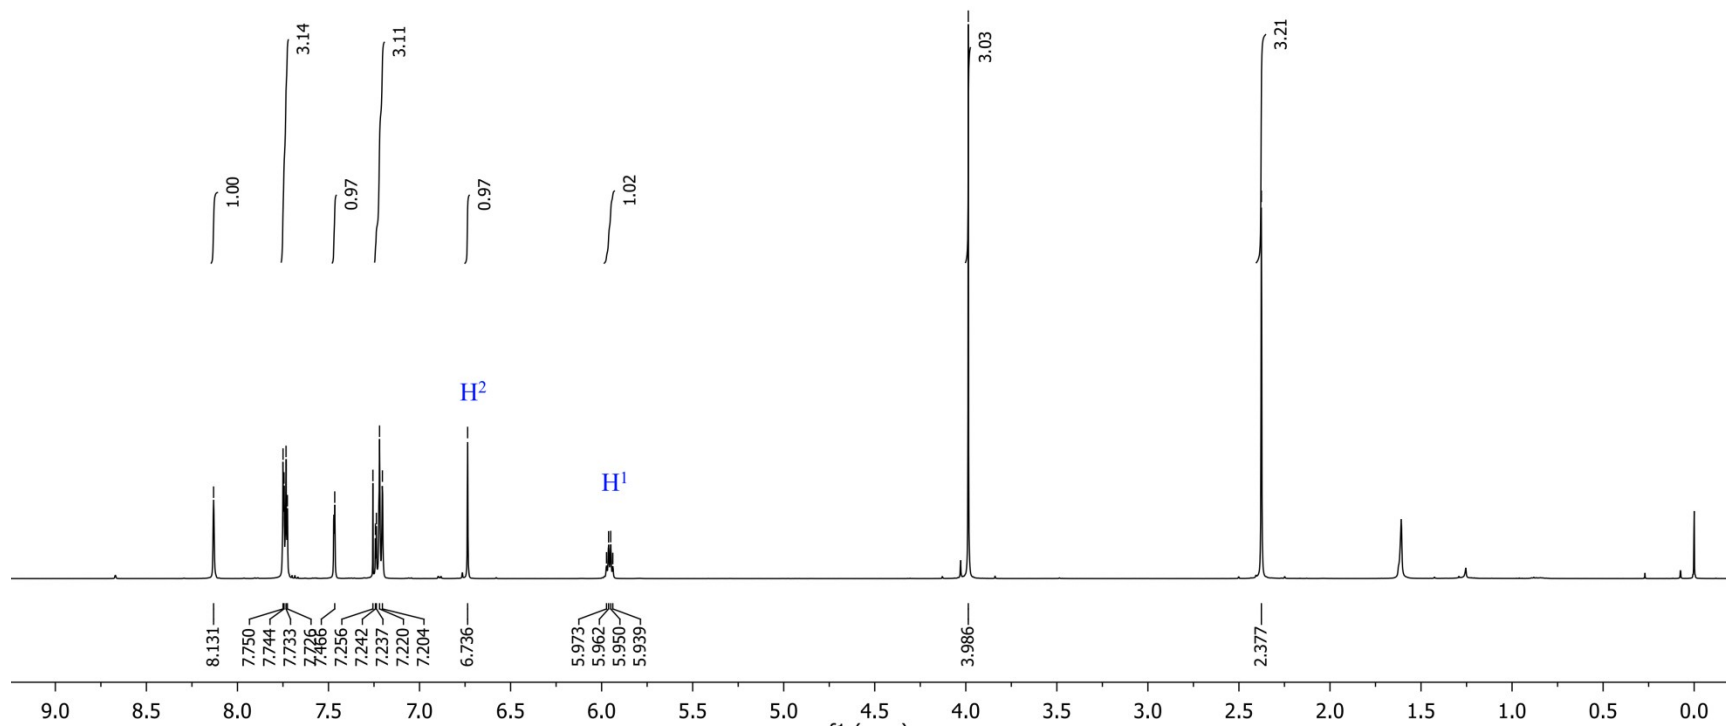

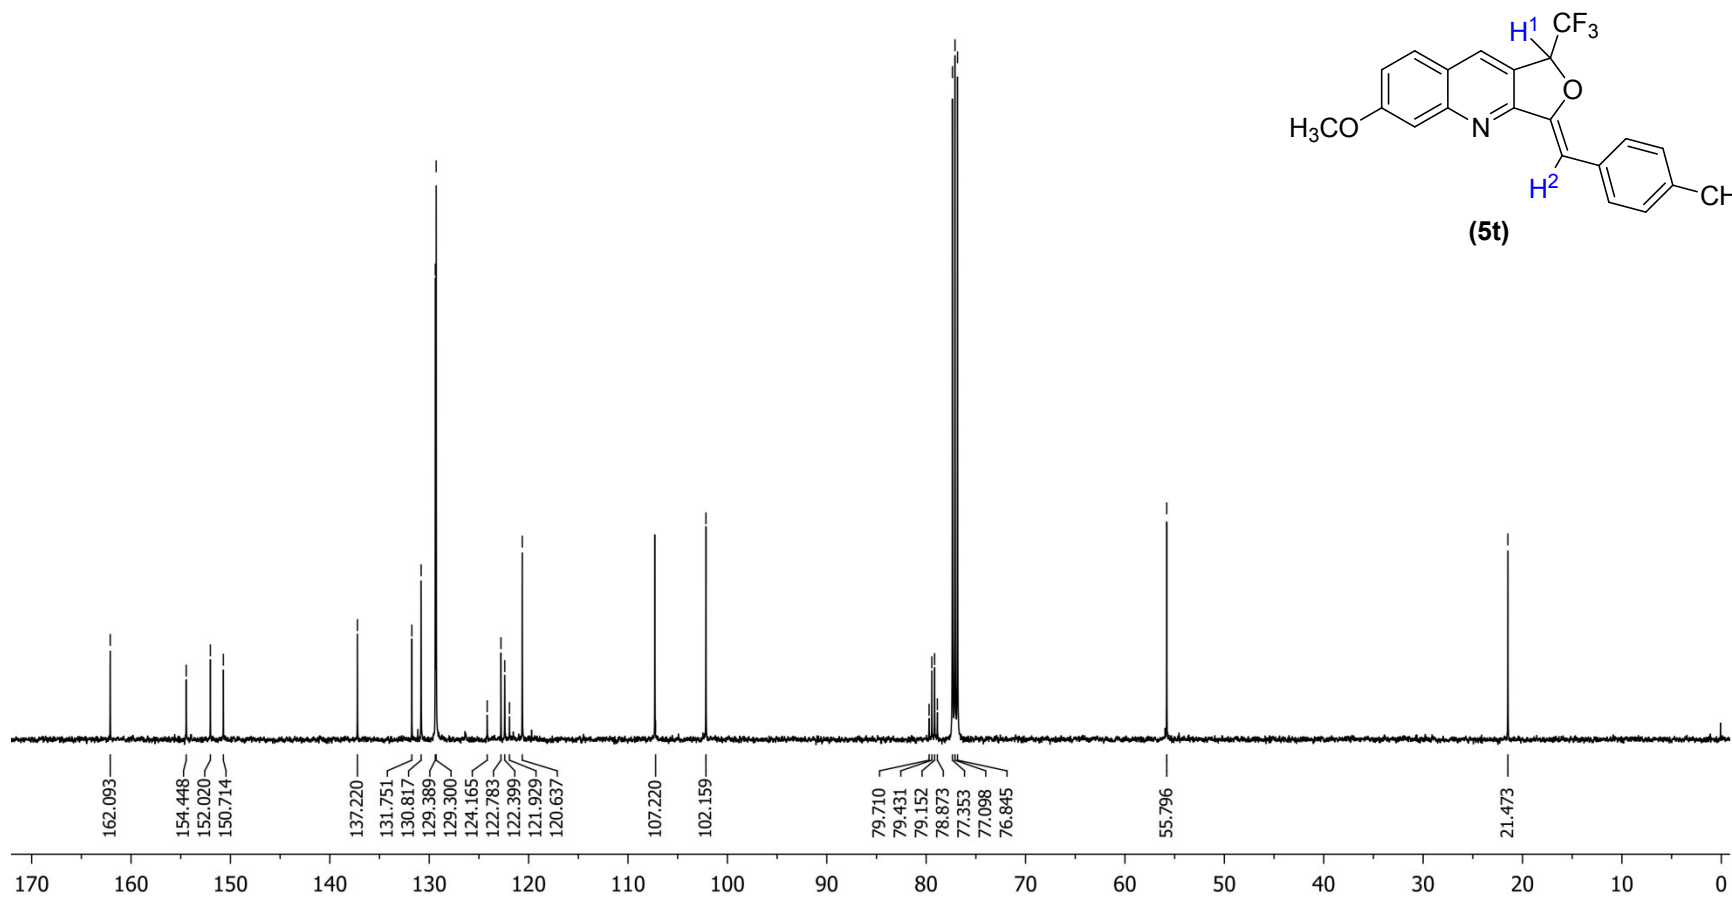

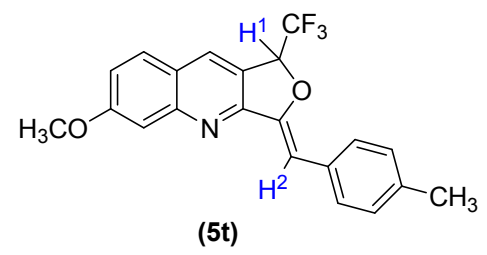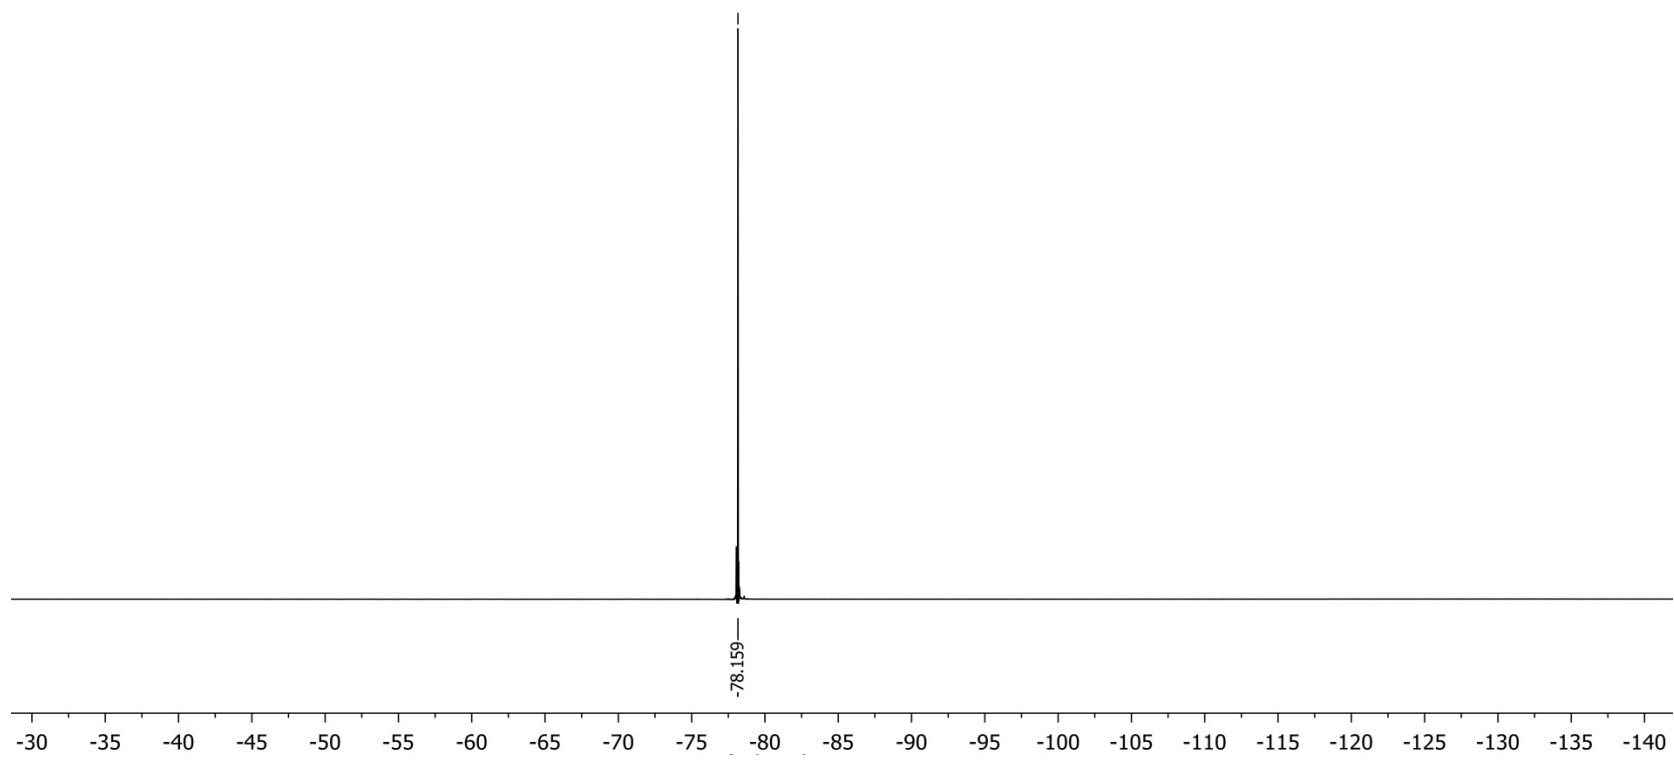

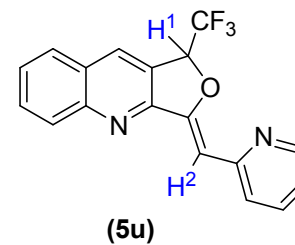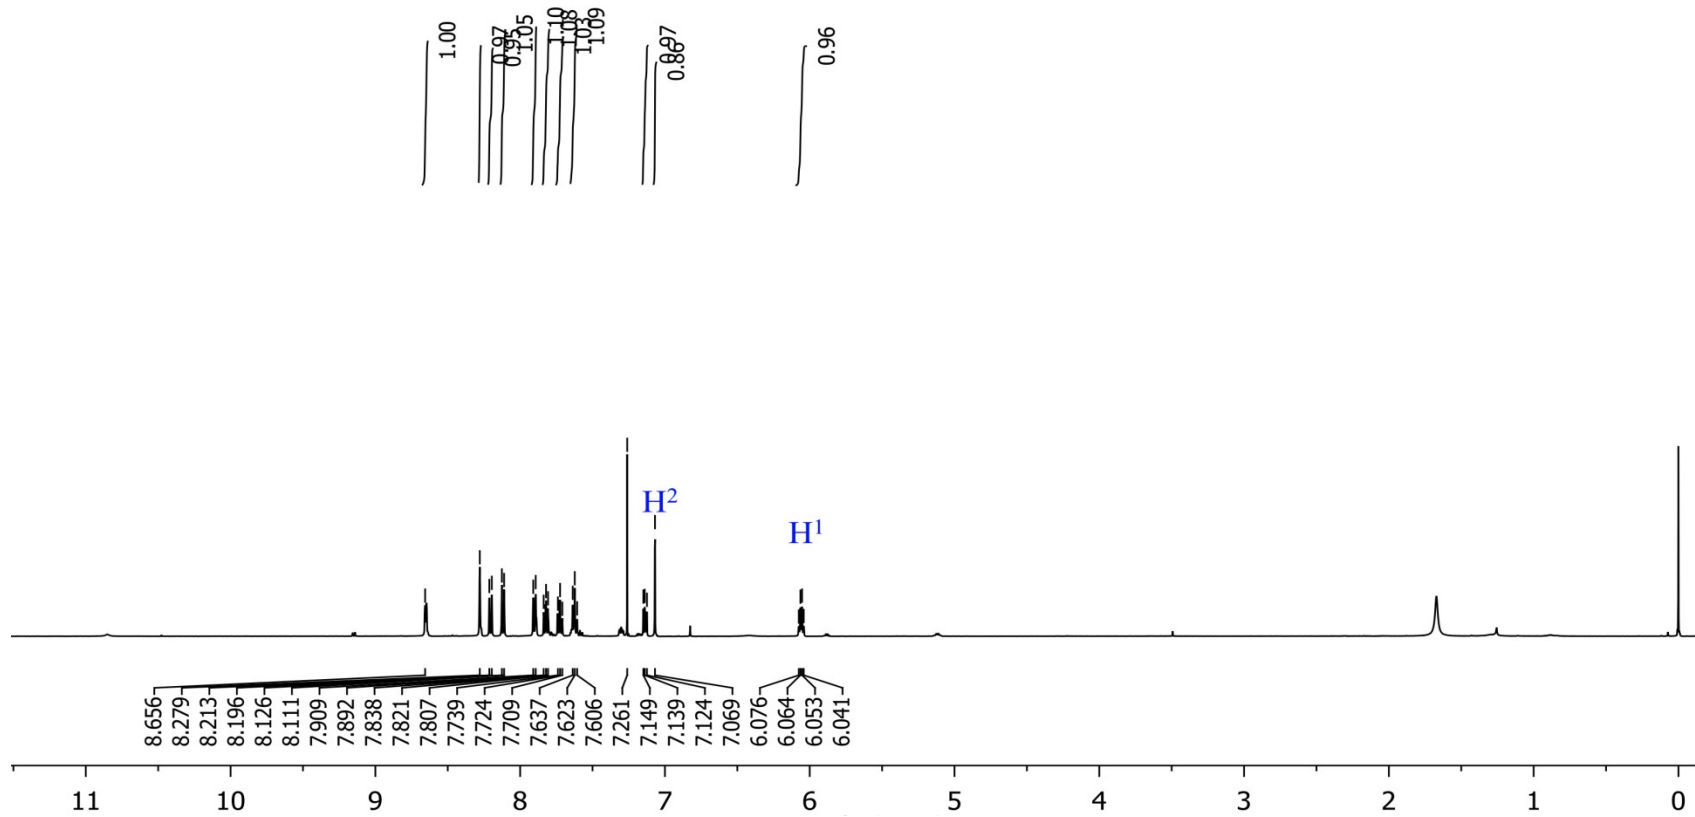



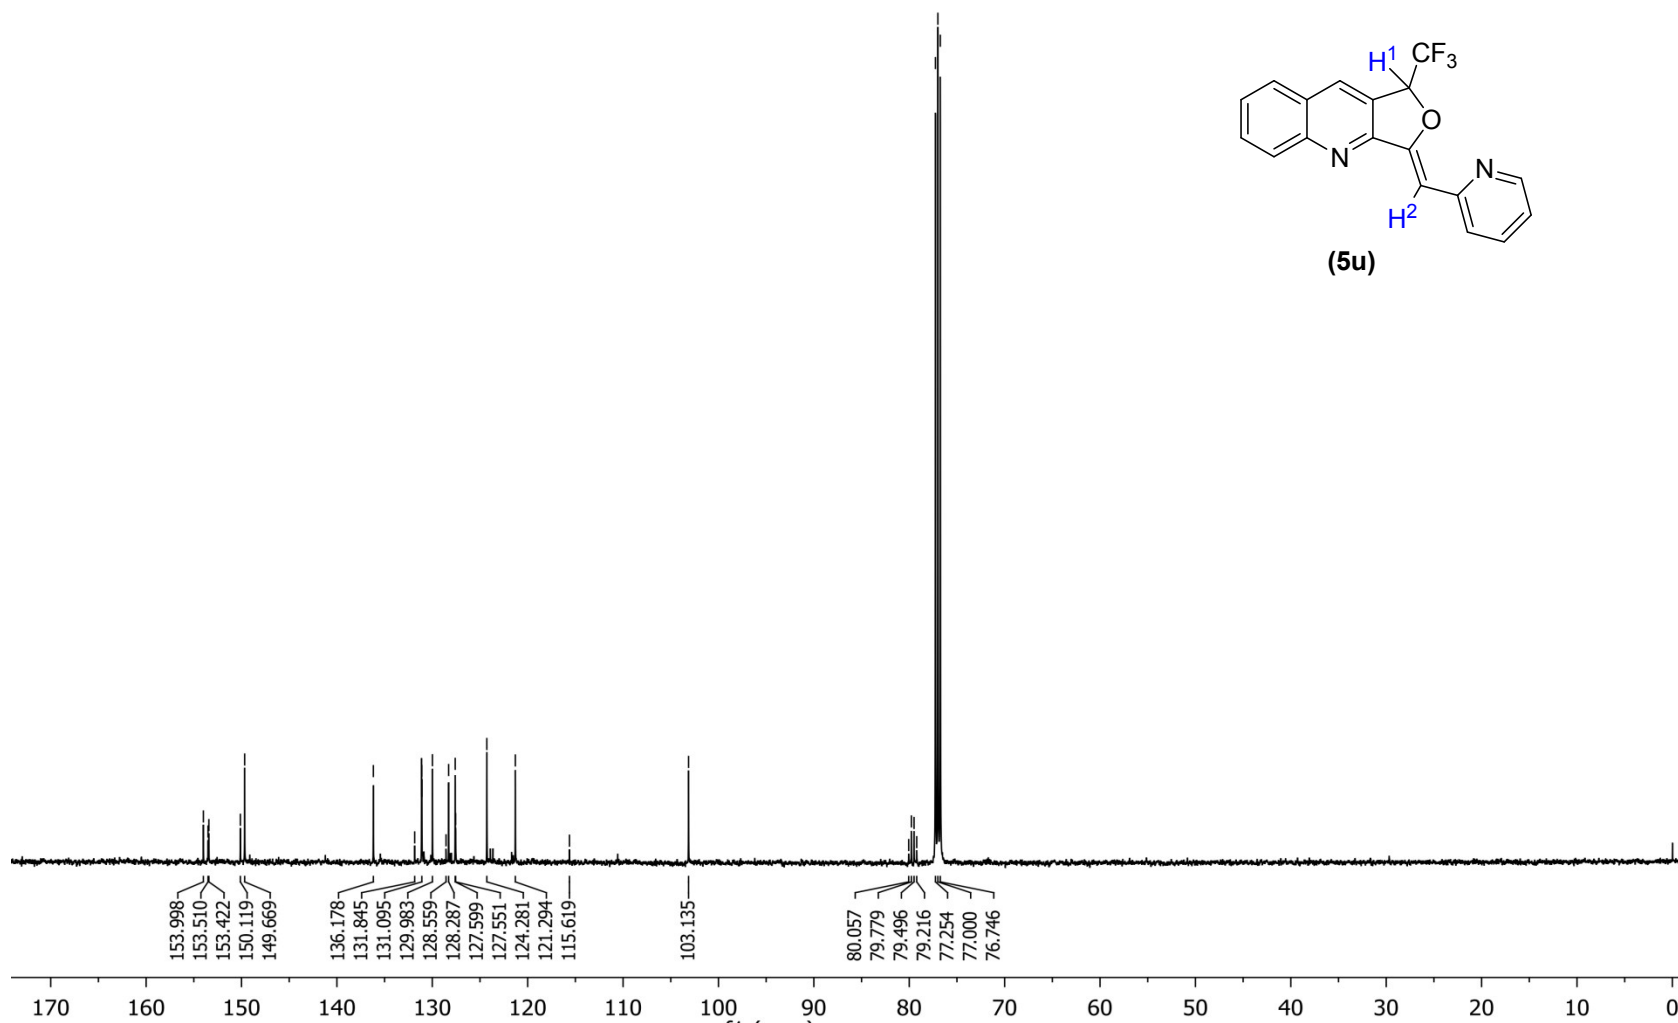

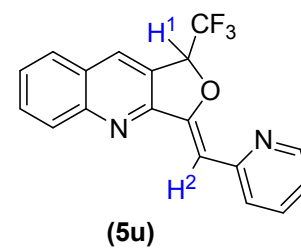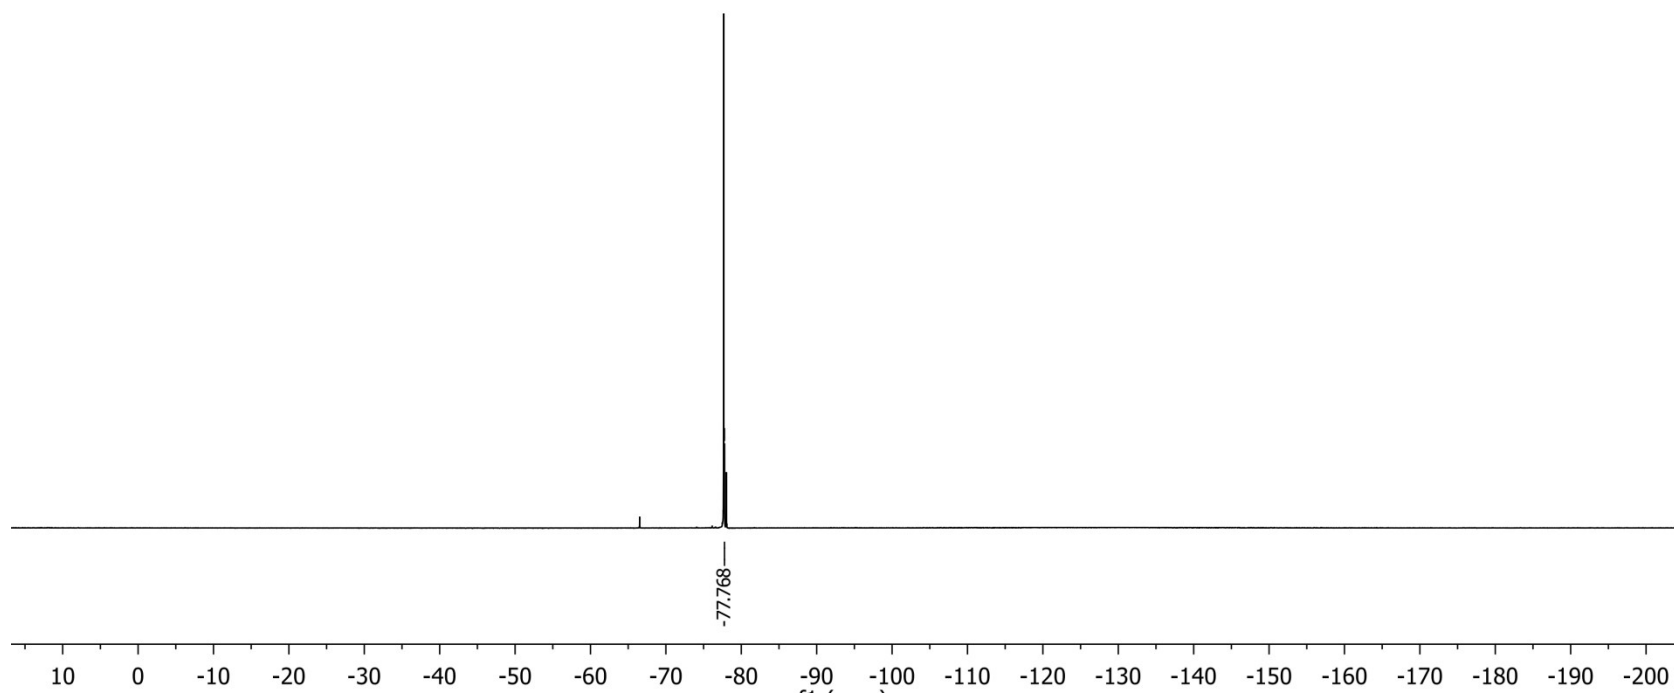

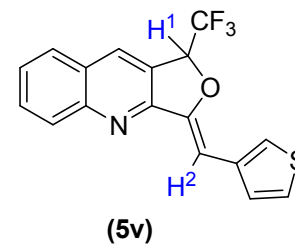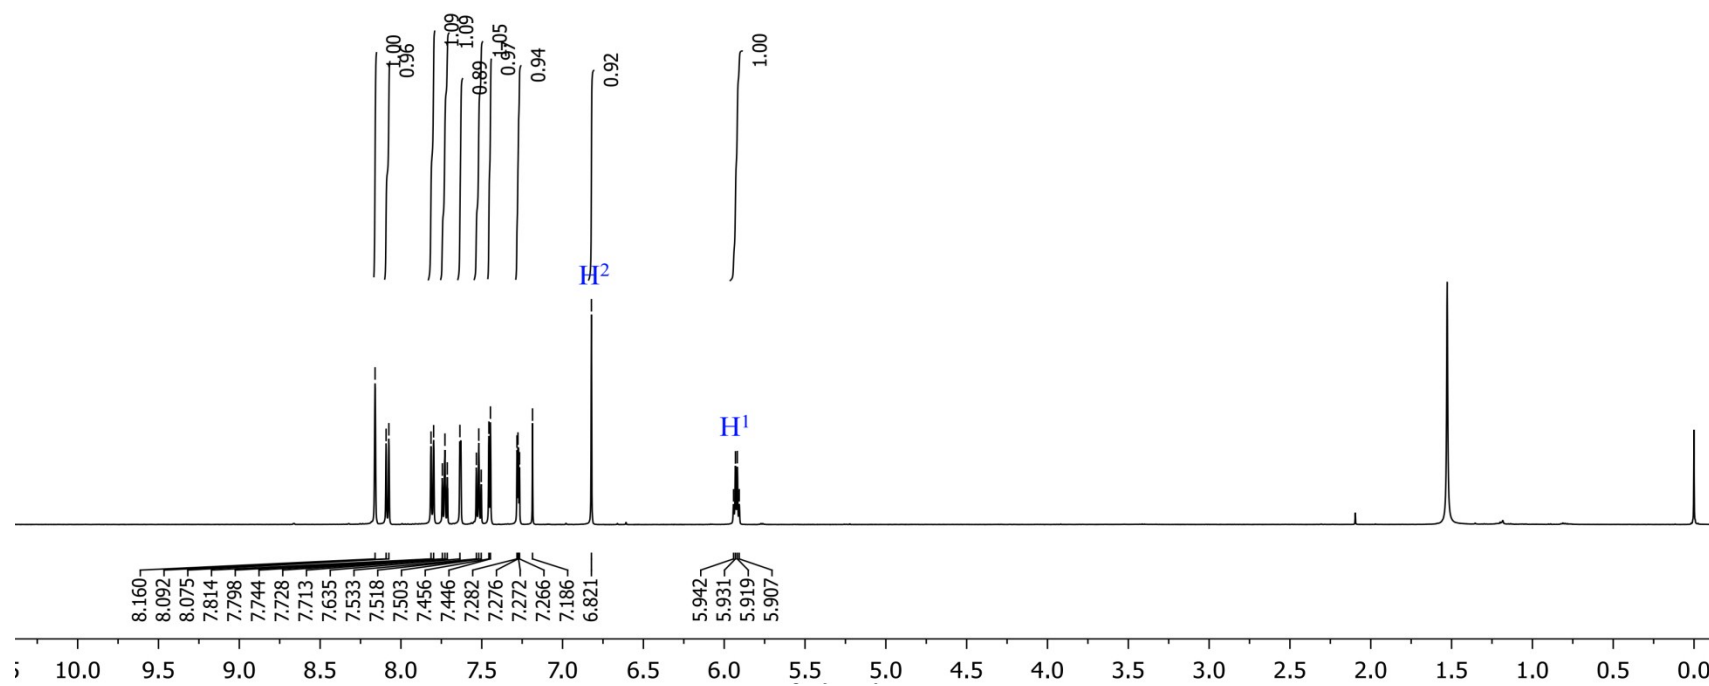

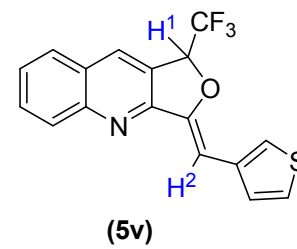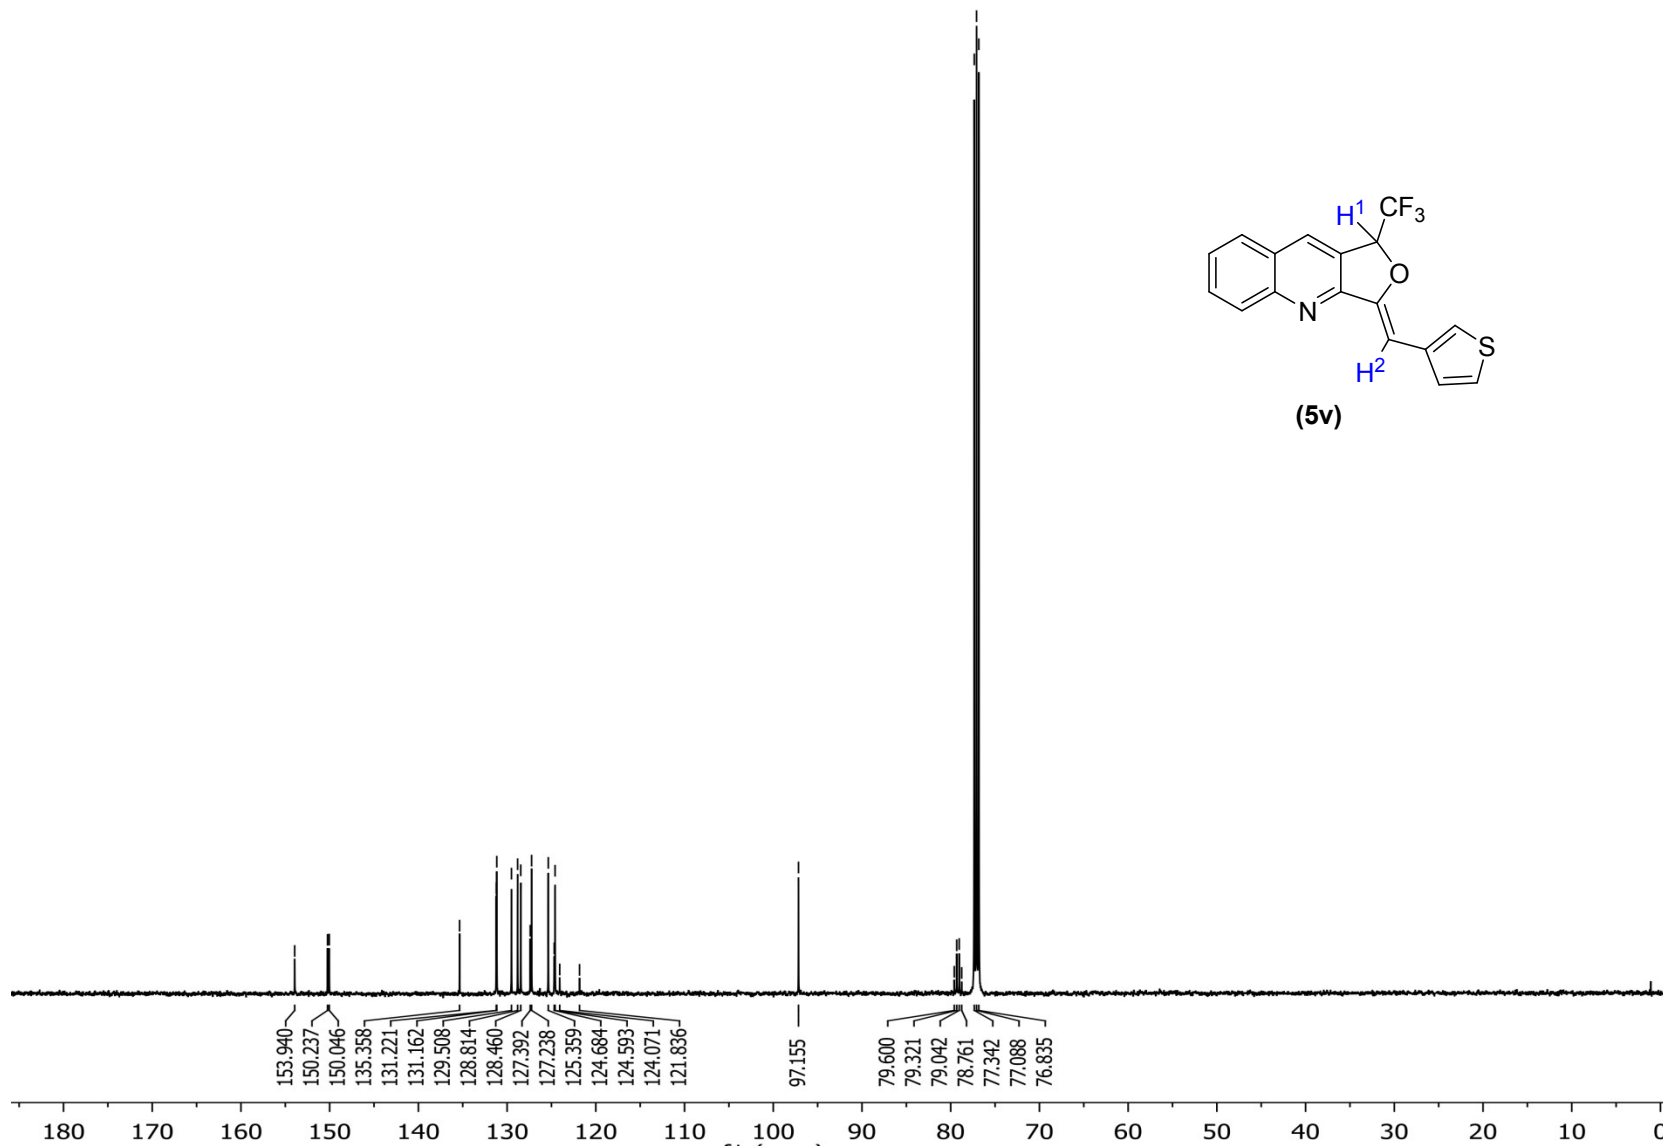

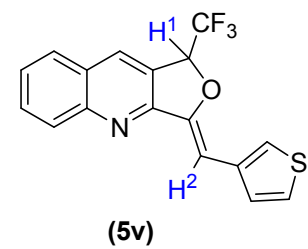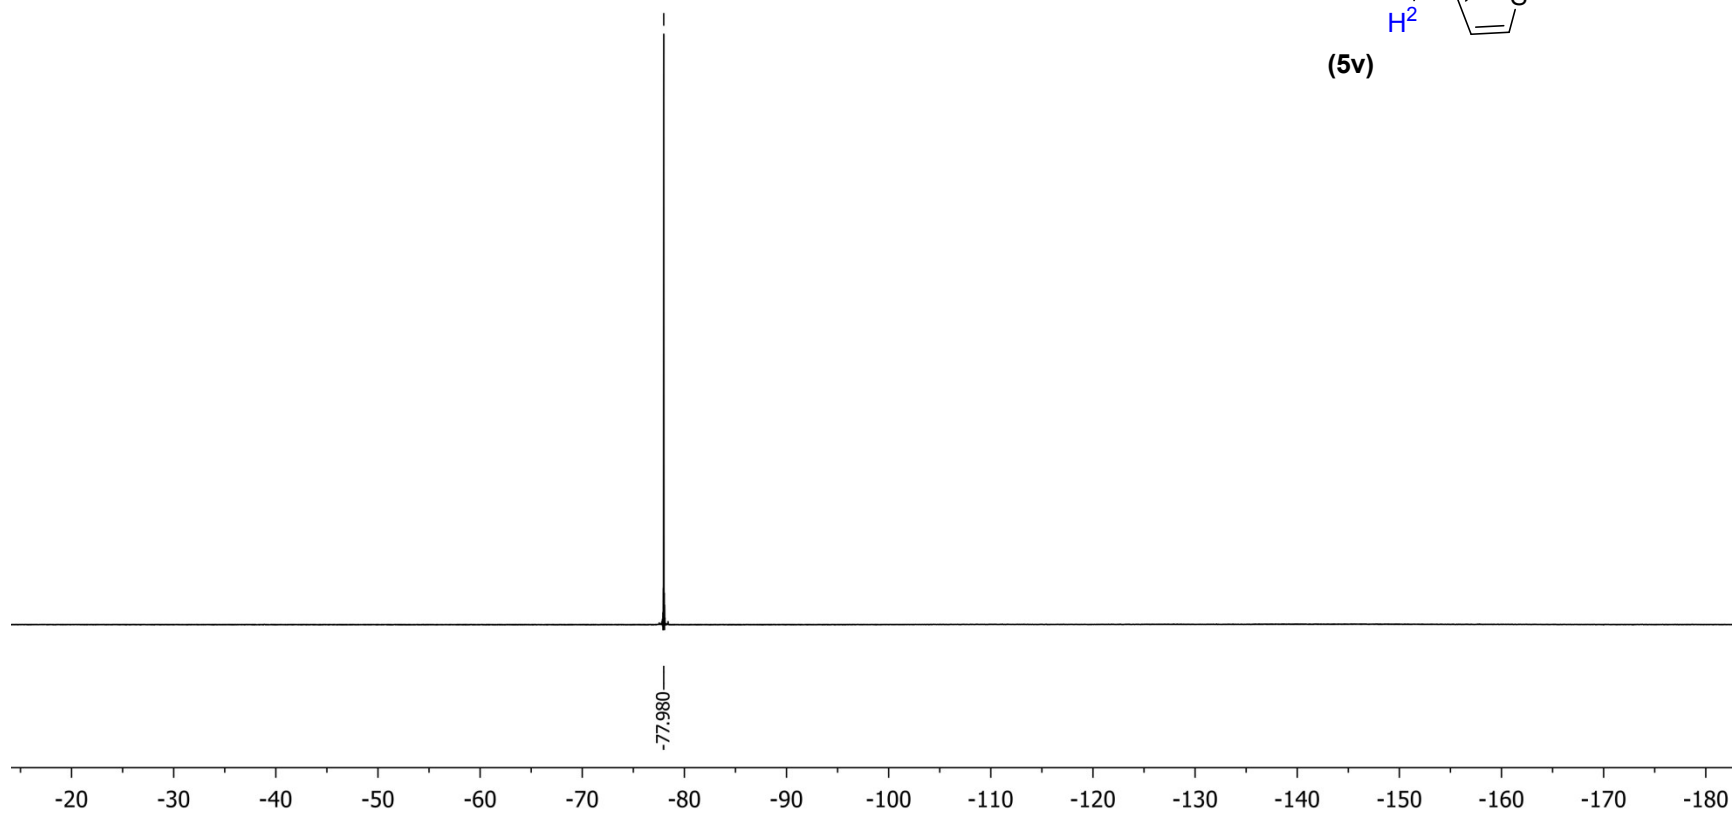

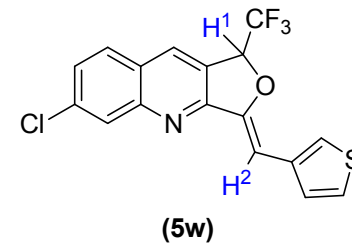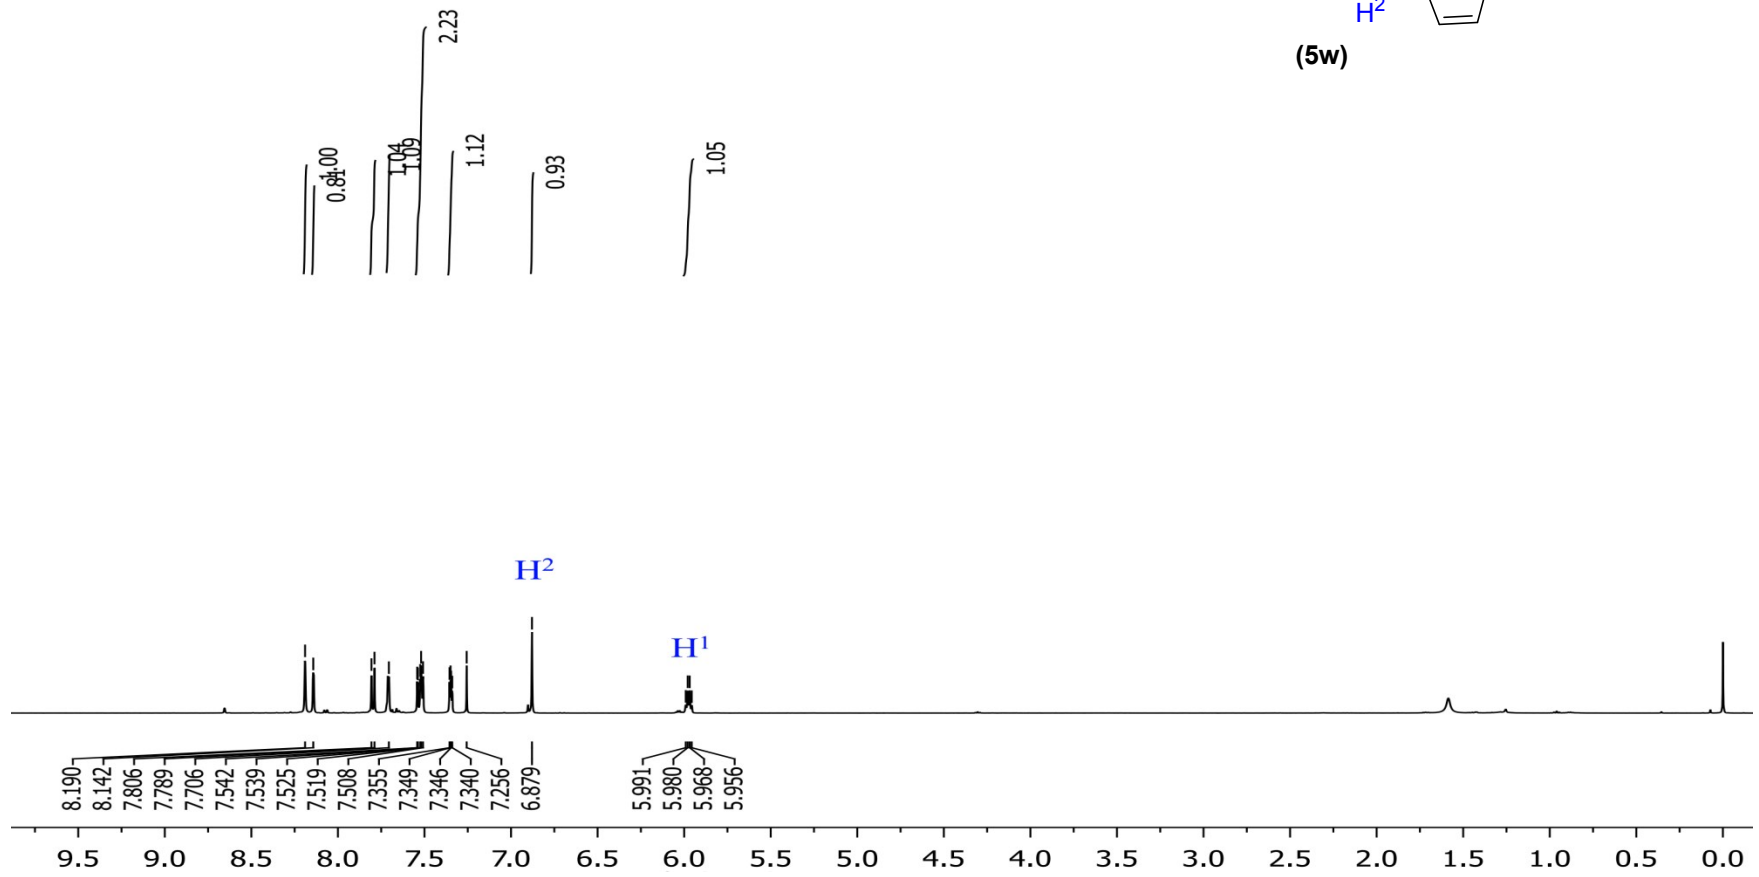

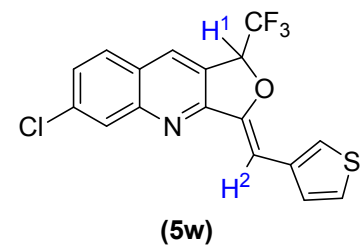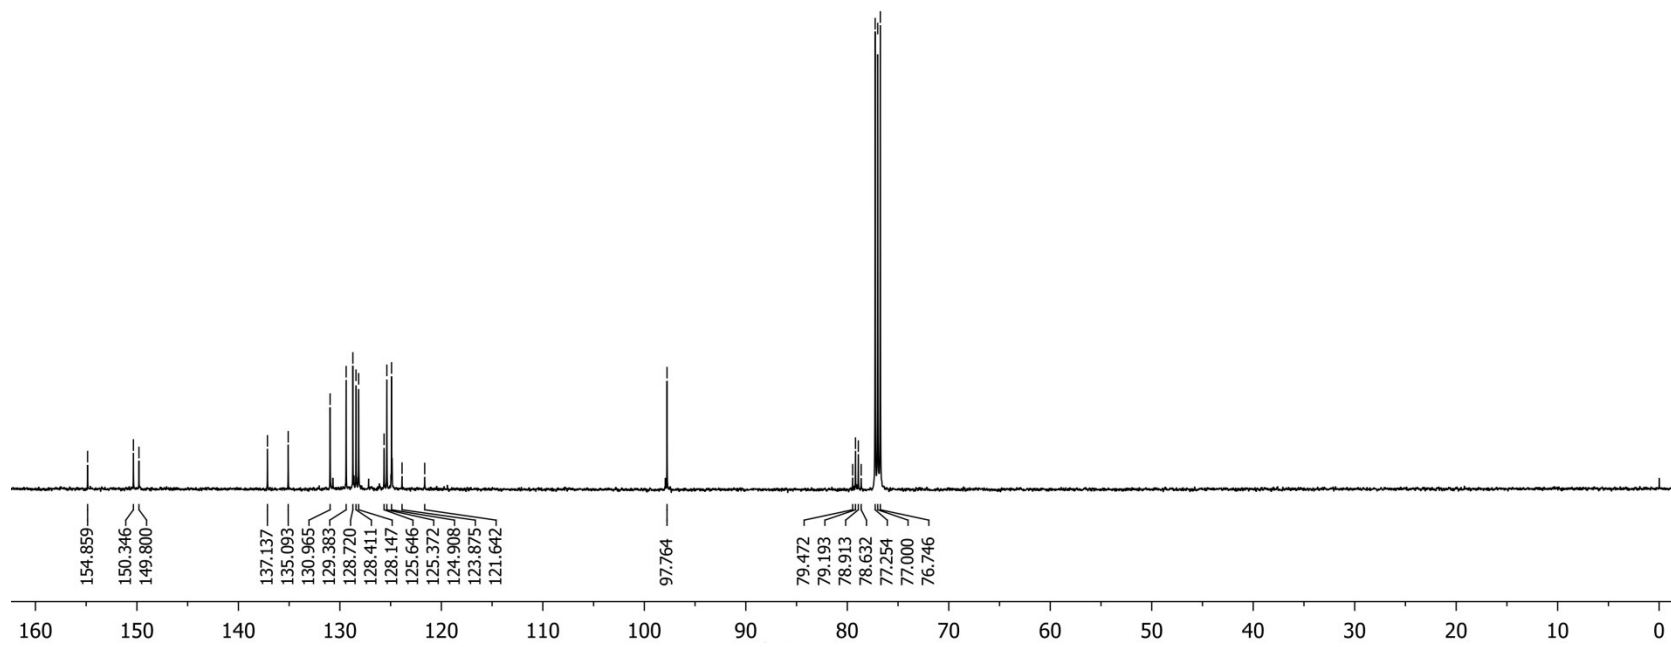

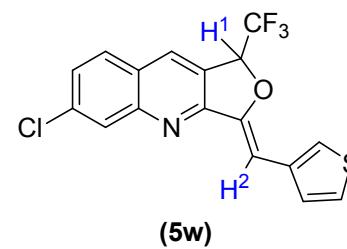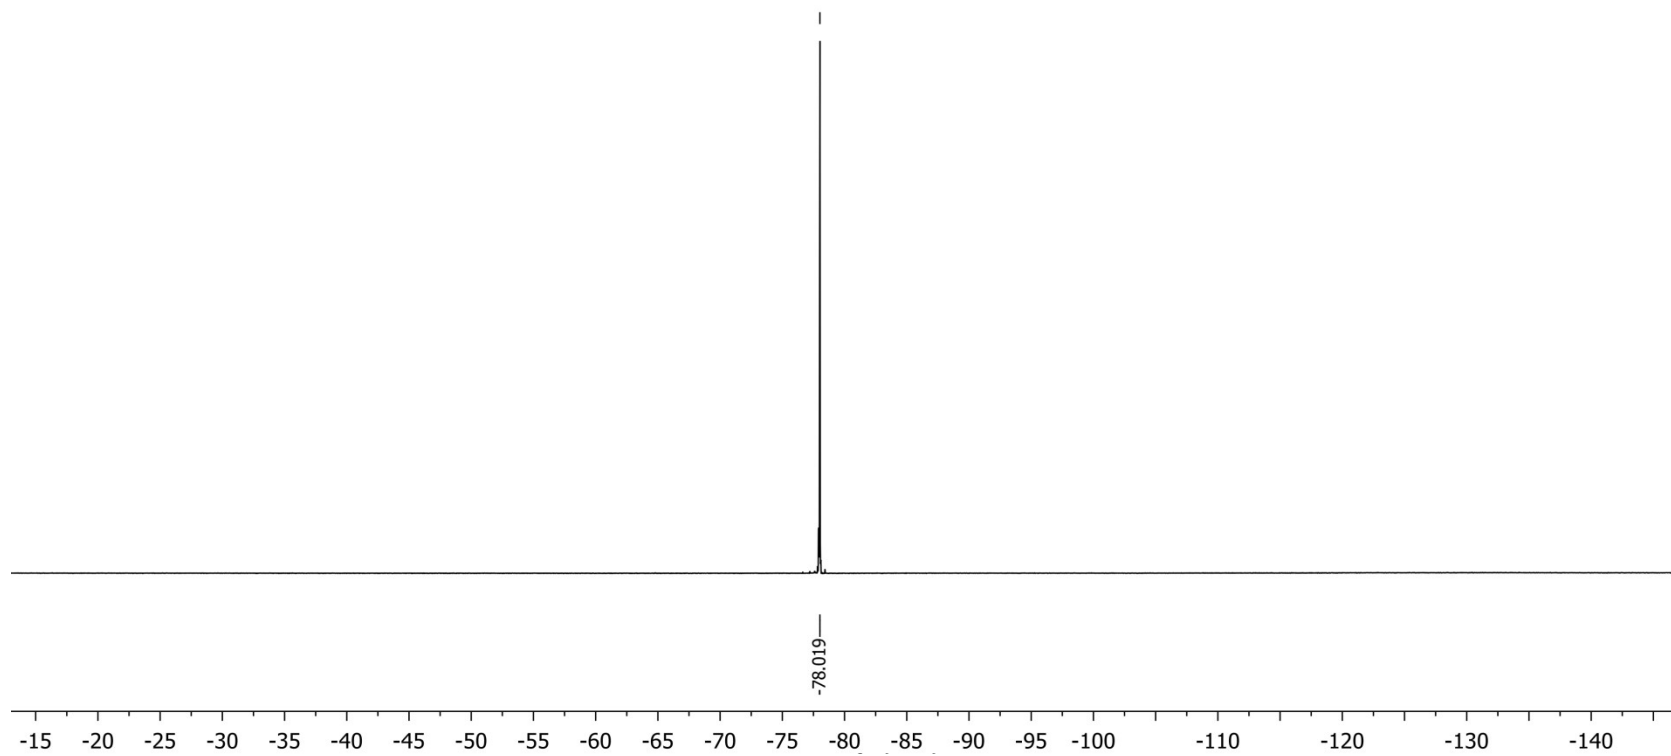



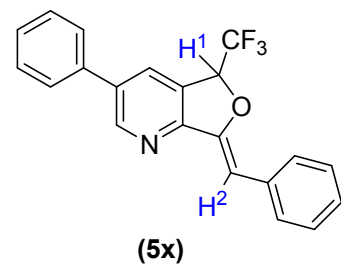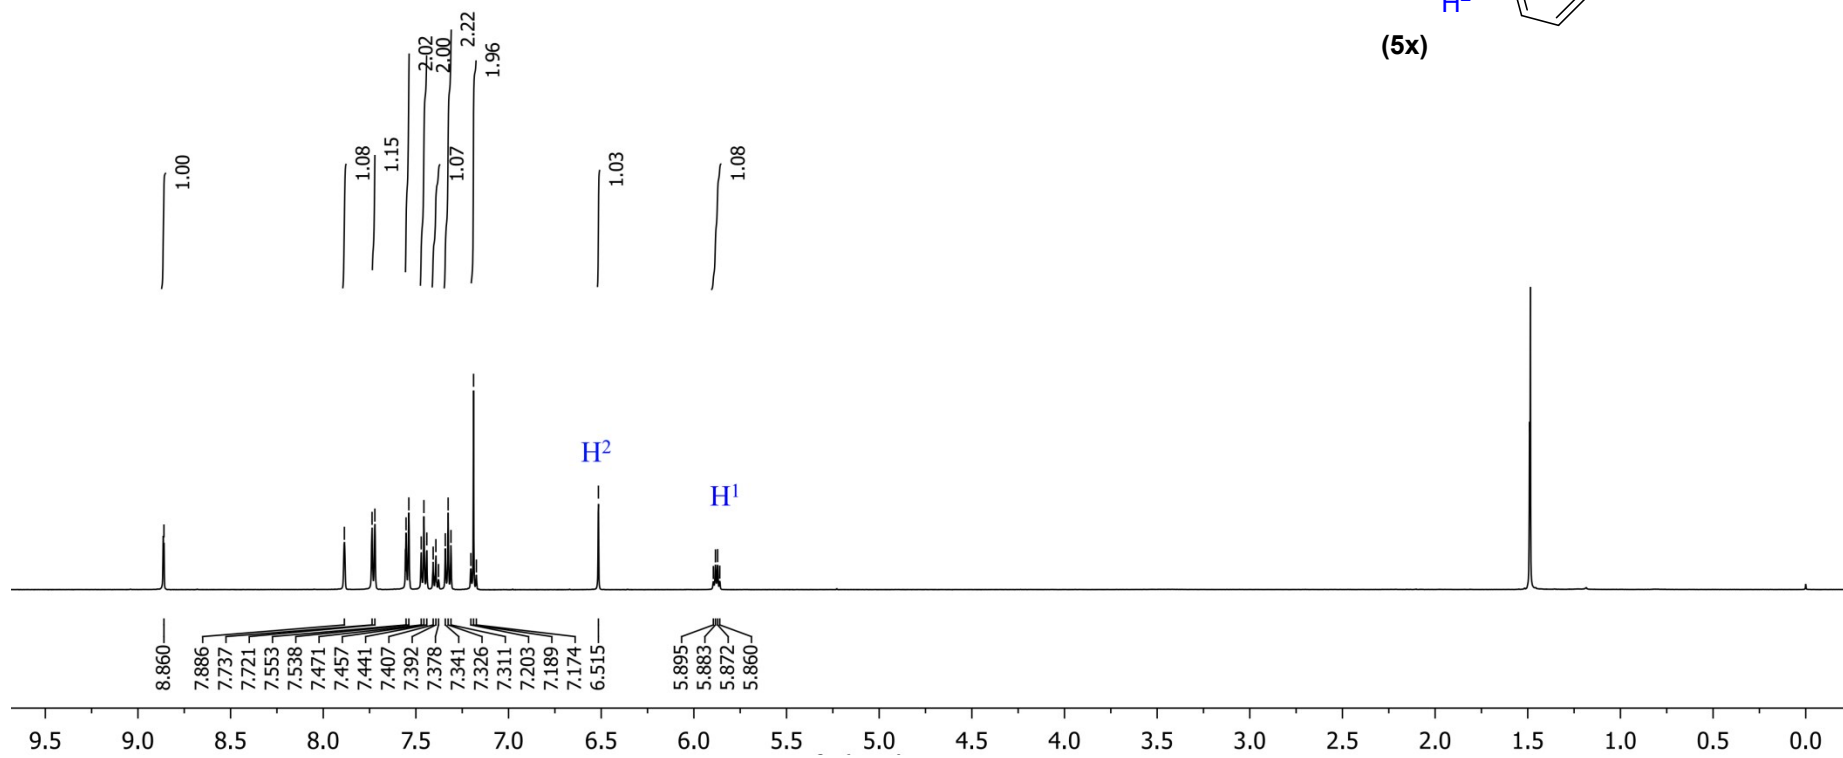

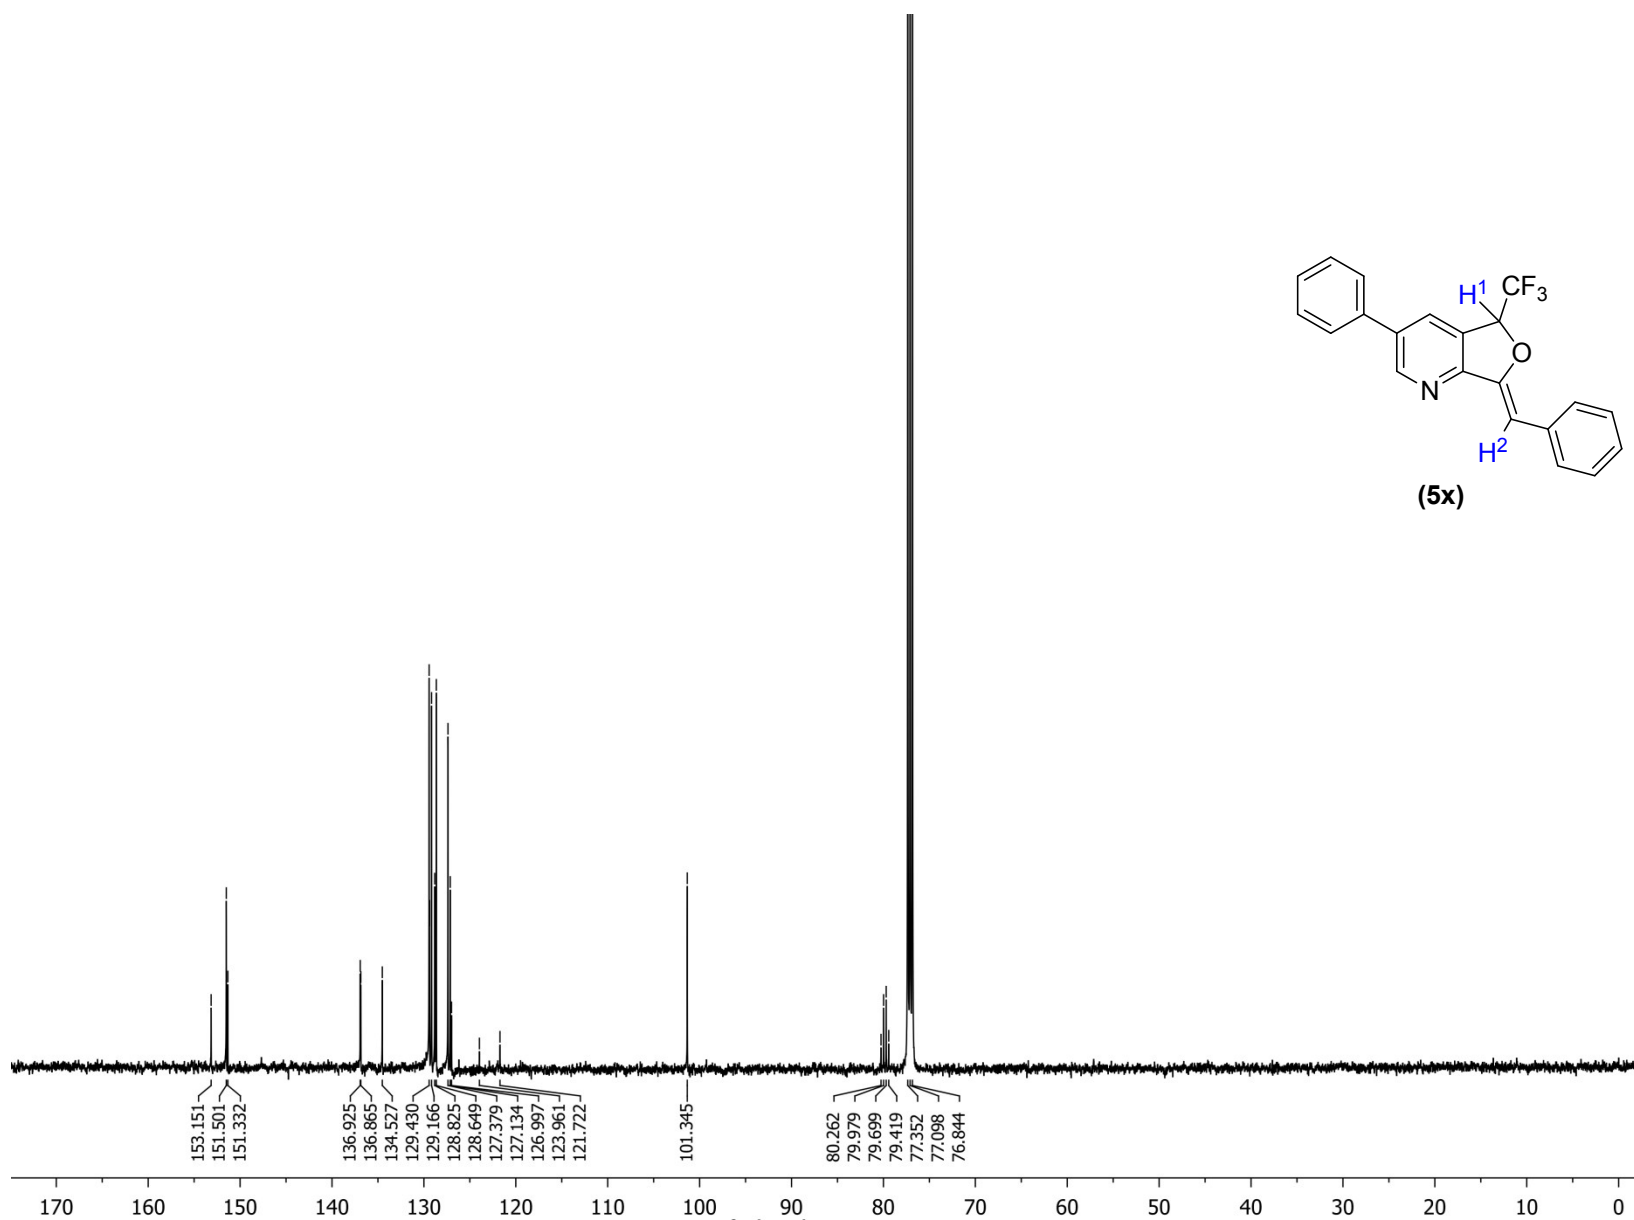

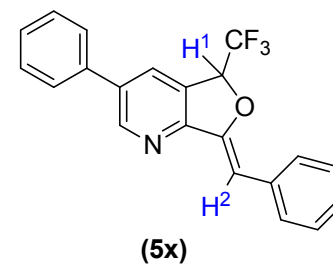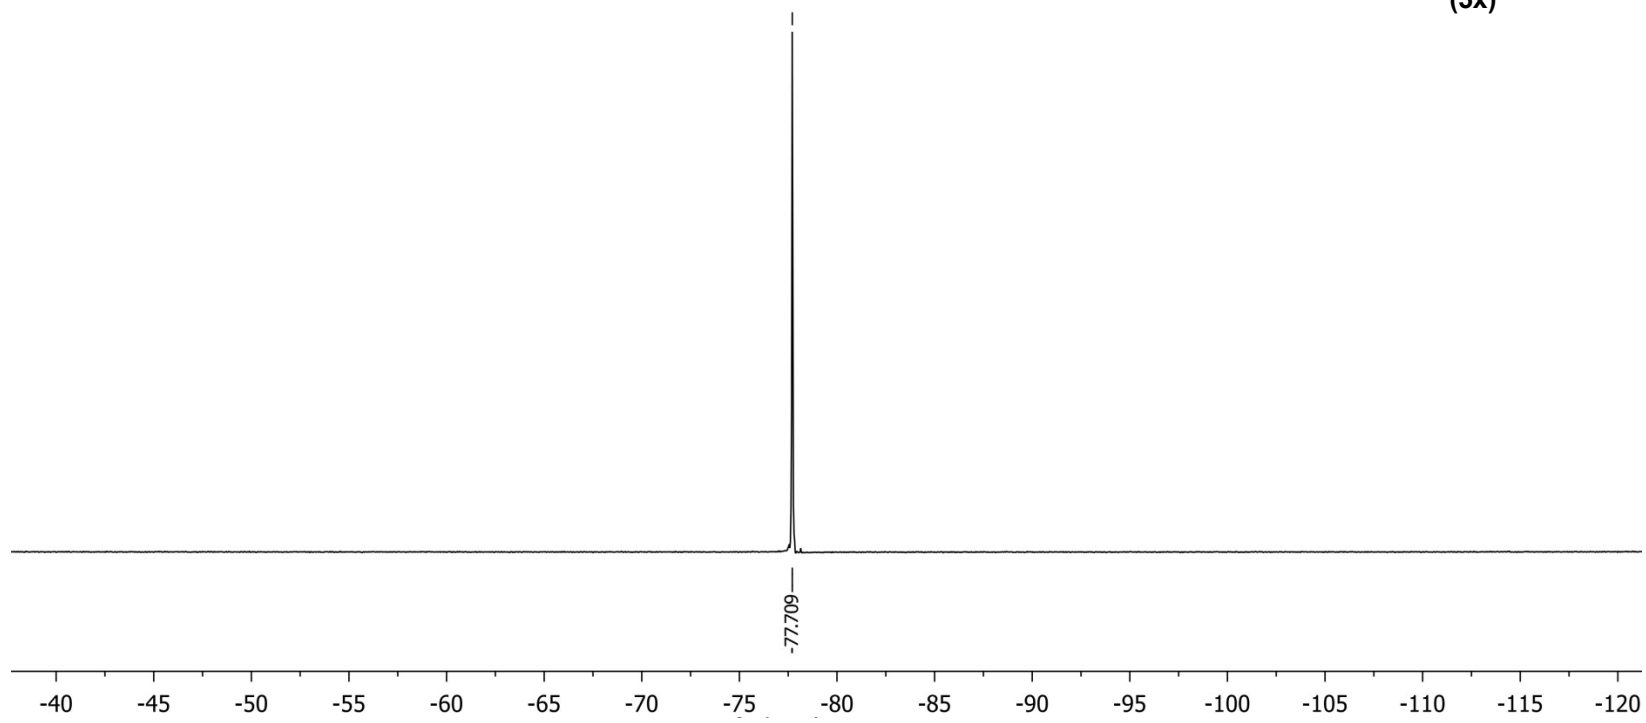

Supplement: c7qo00273d1.pdf [file c7qo00273d1.pdf]
